# Supplementary material
Source: PubMed Central journal article supplement (PMC6557121)

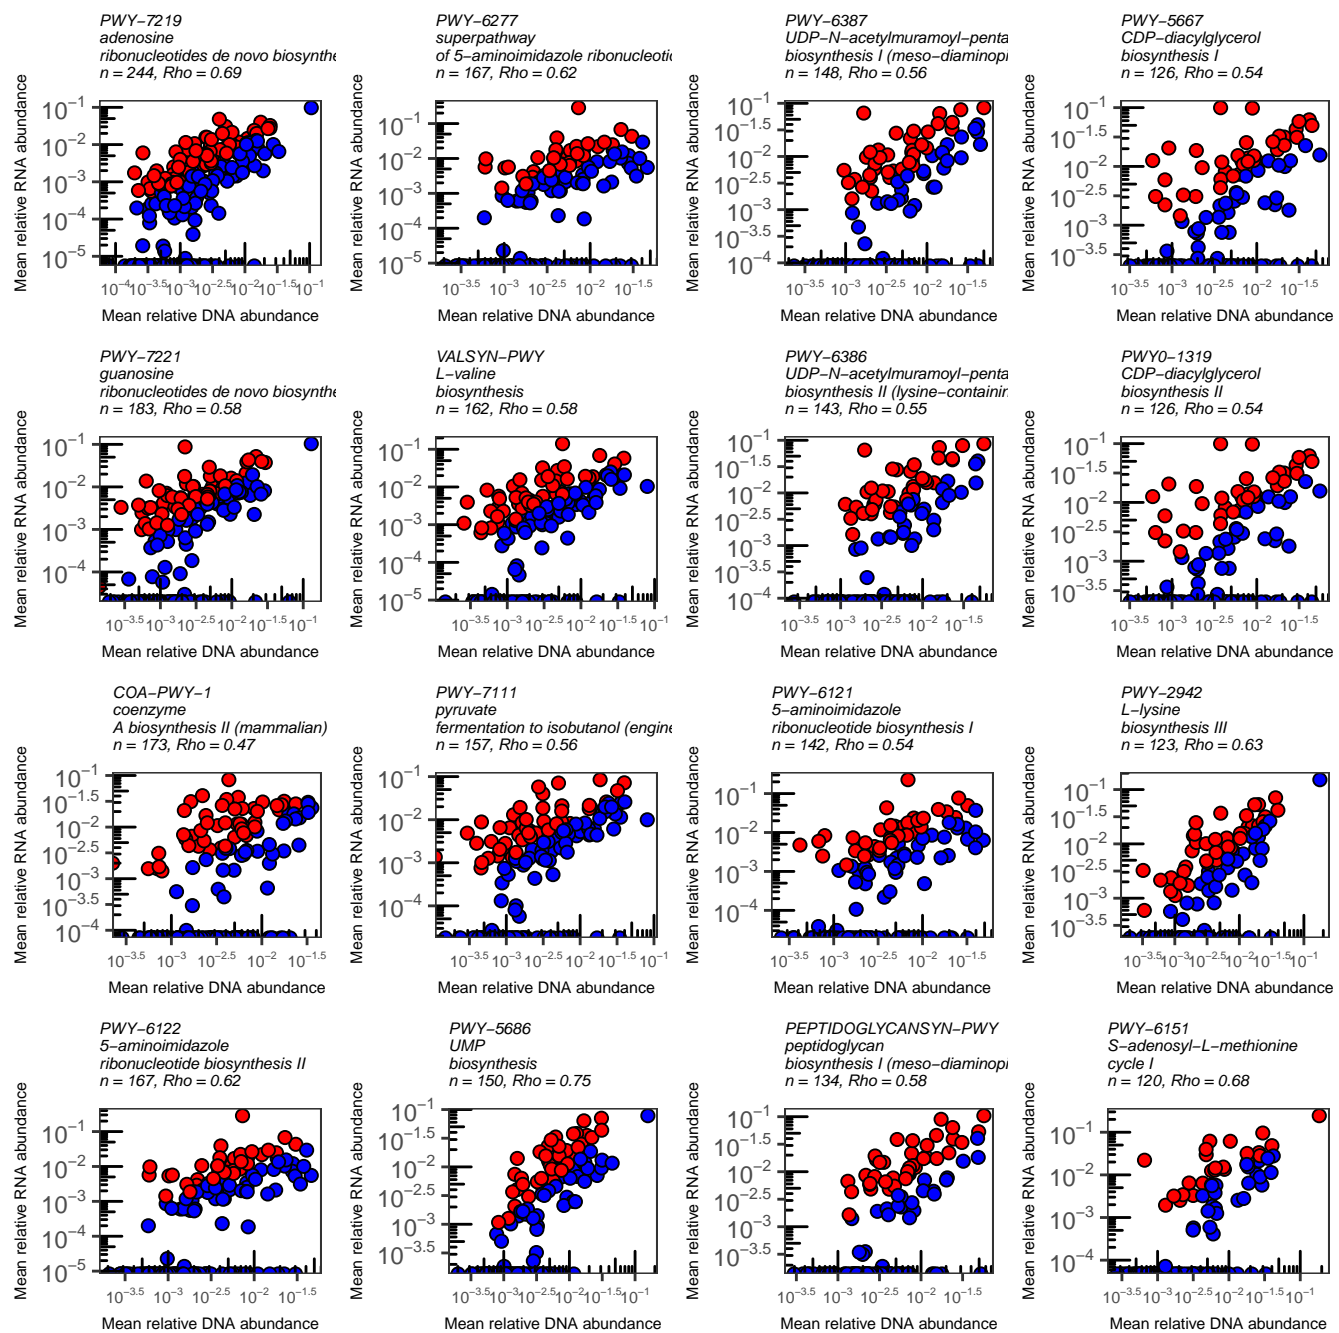

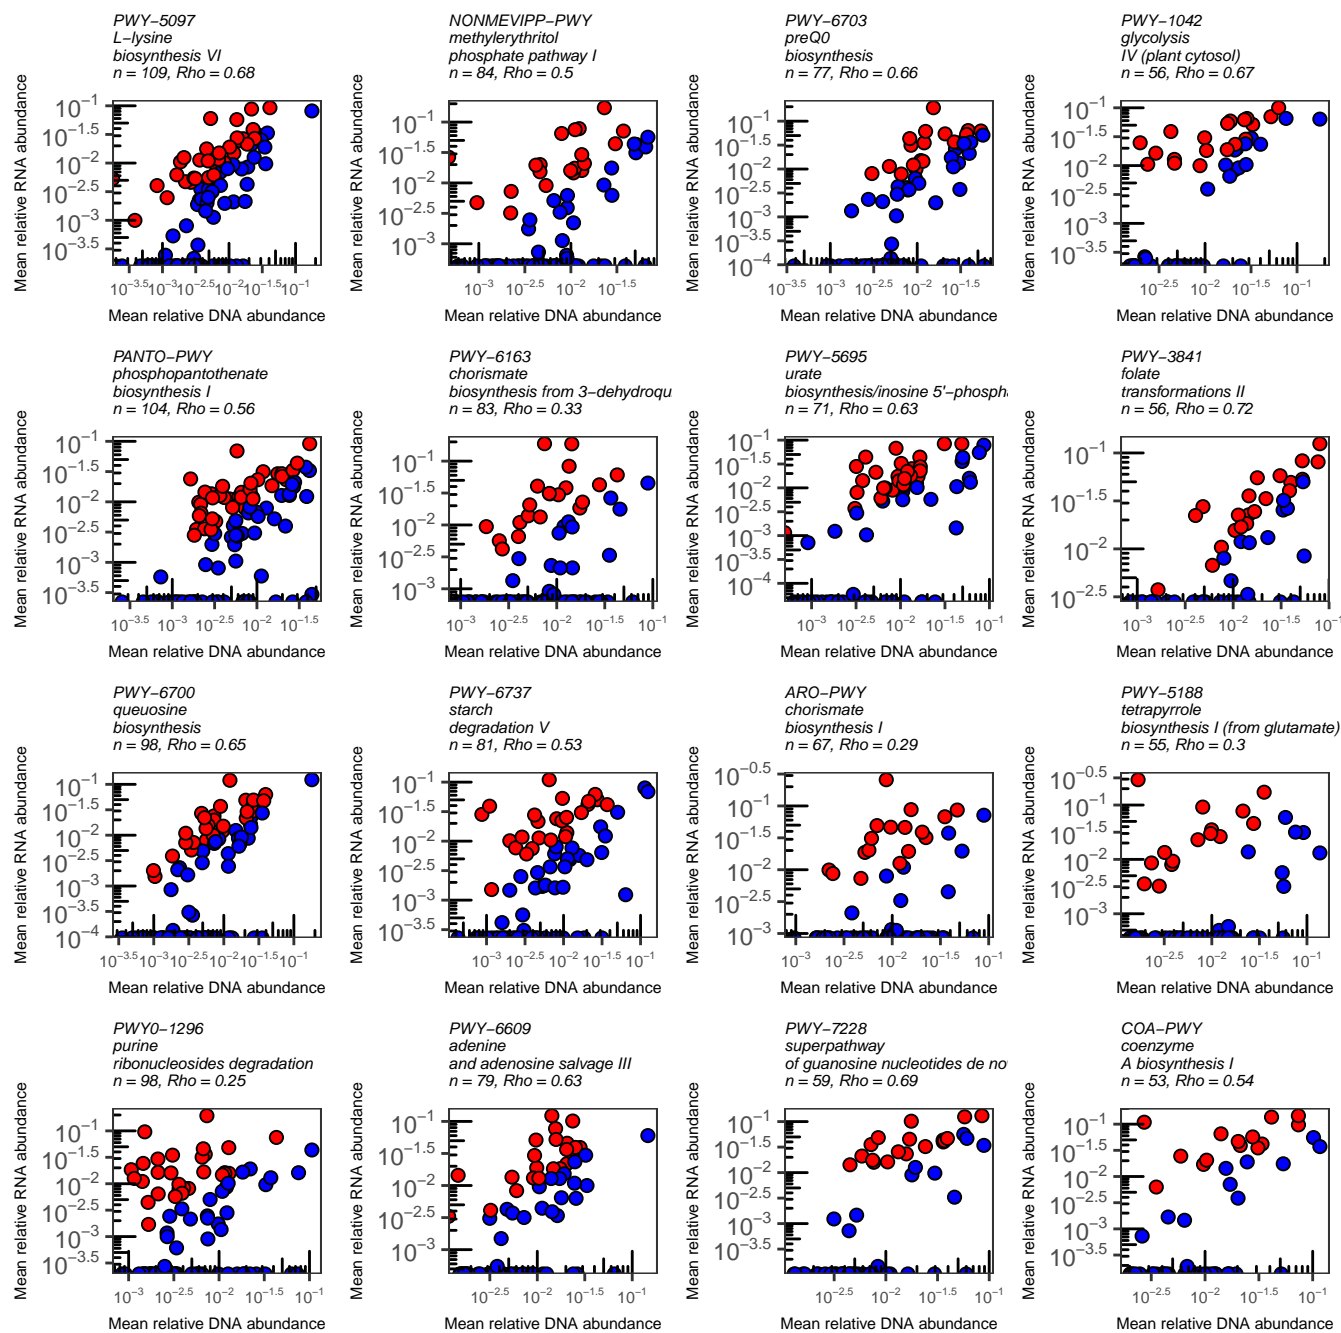

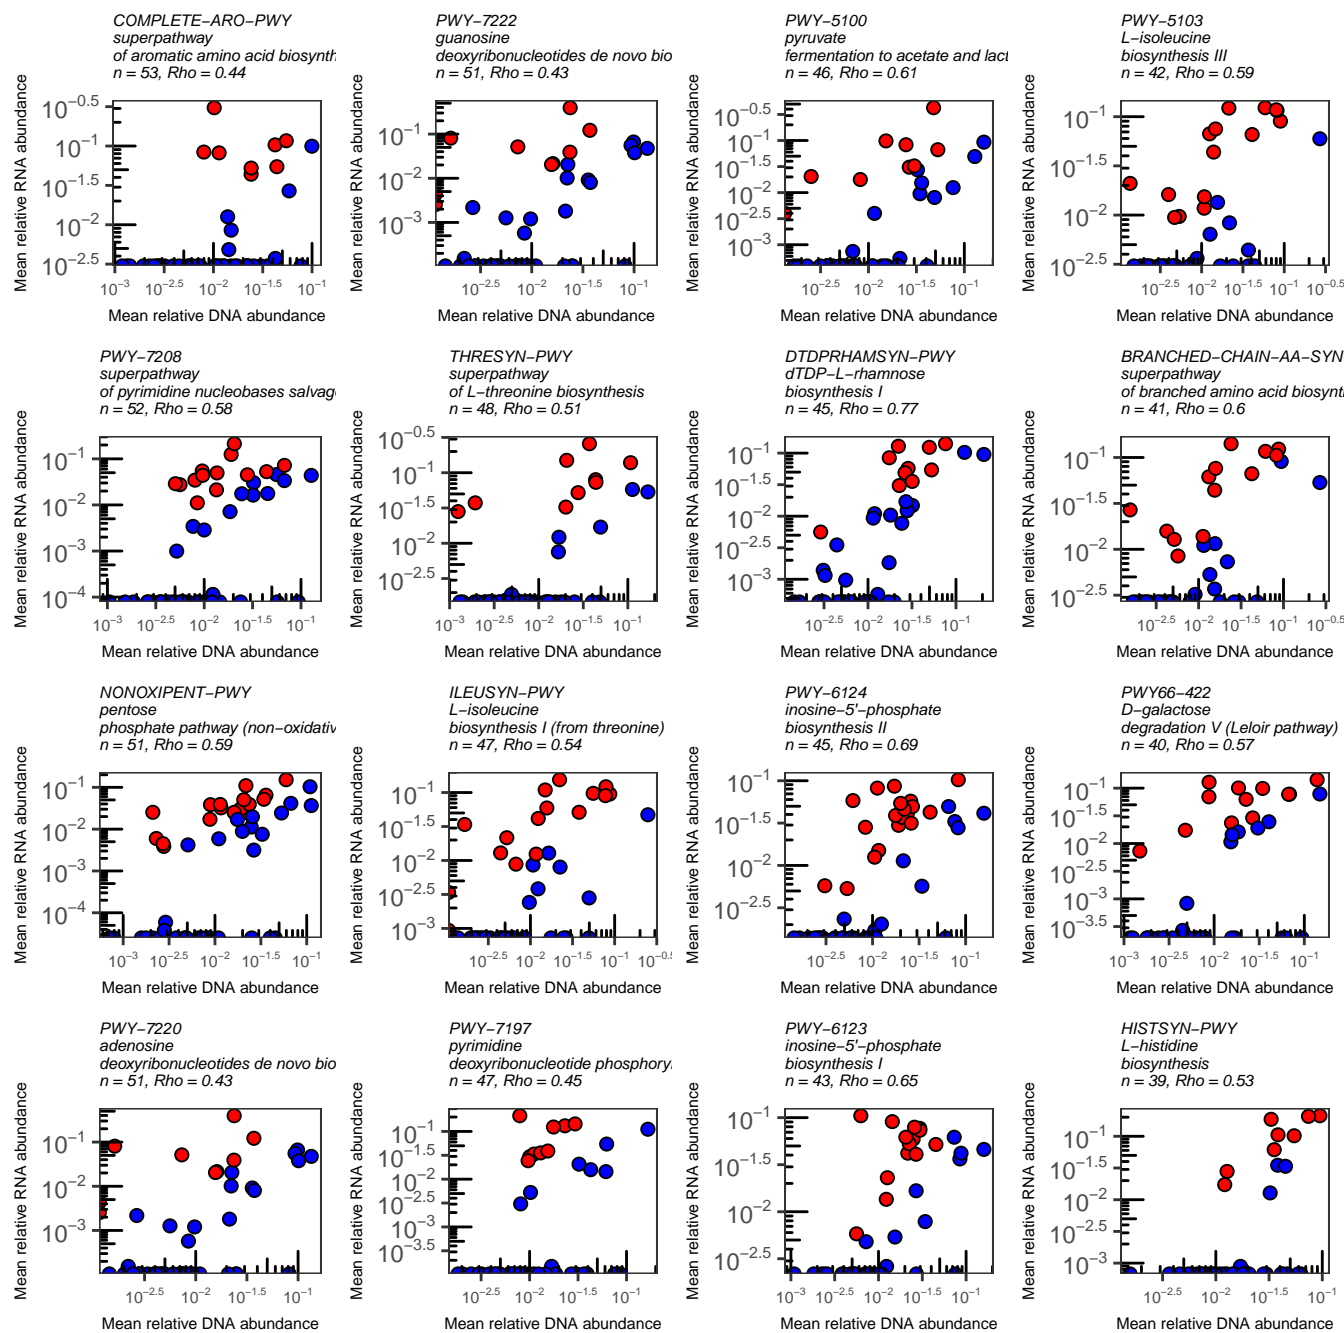

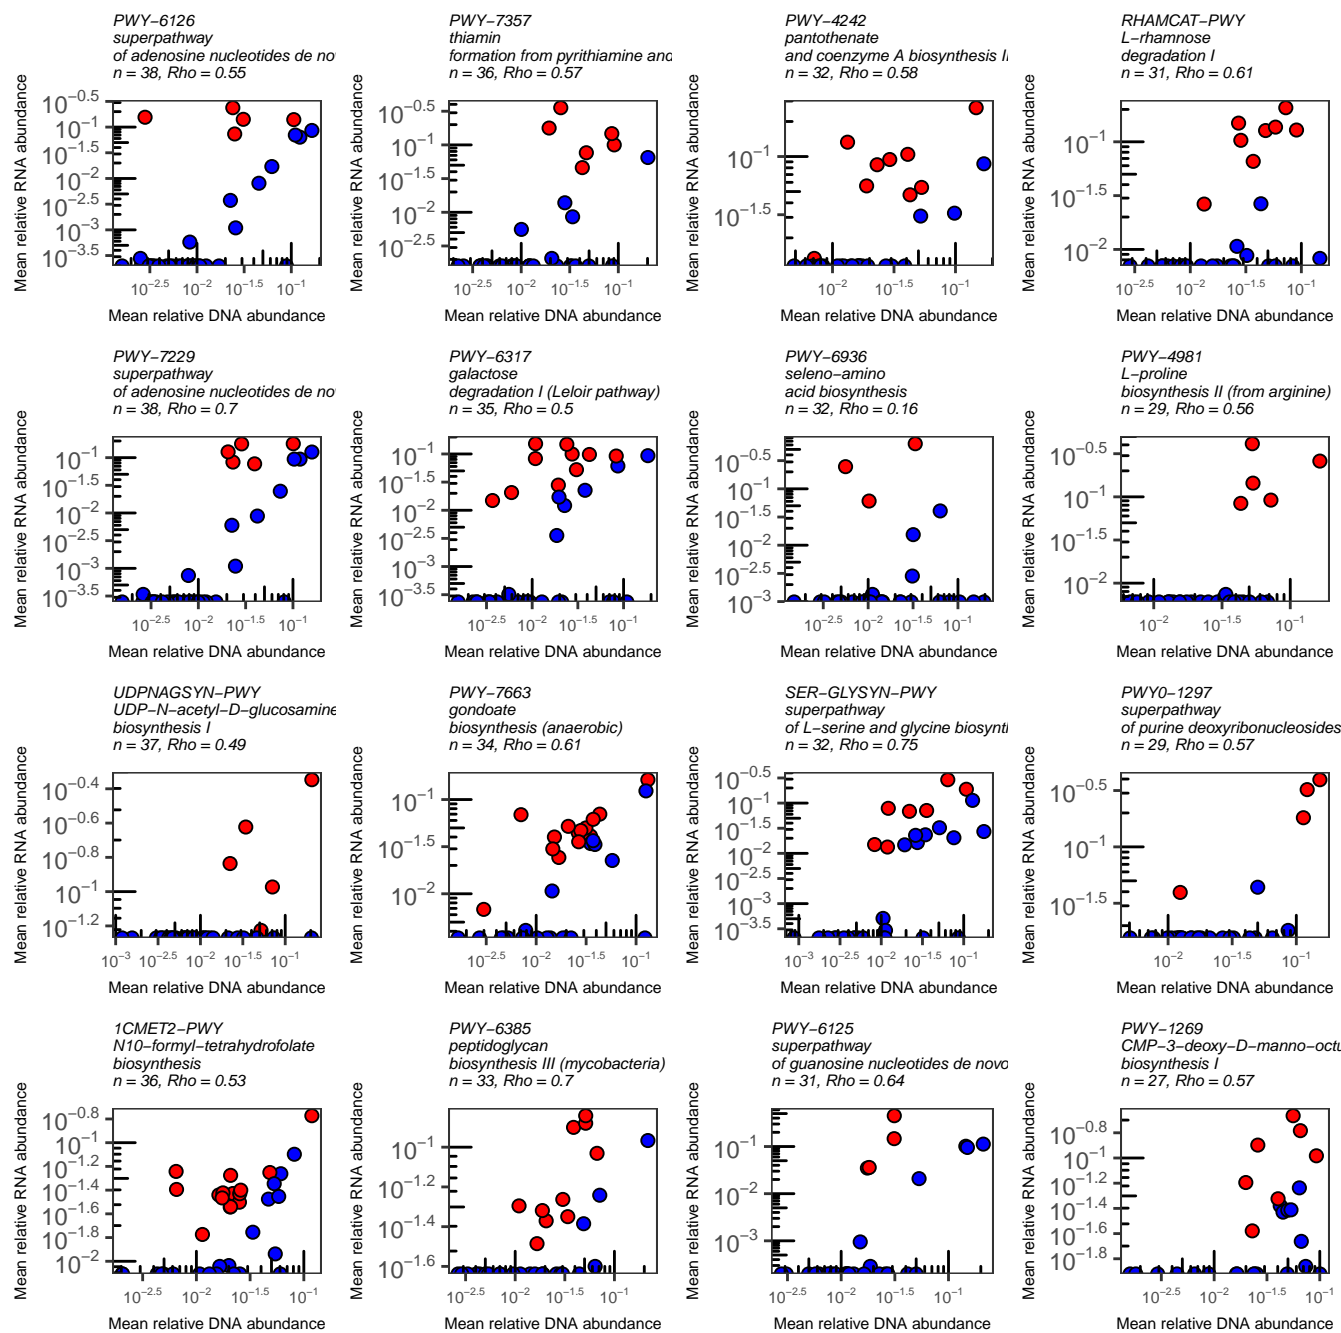

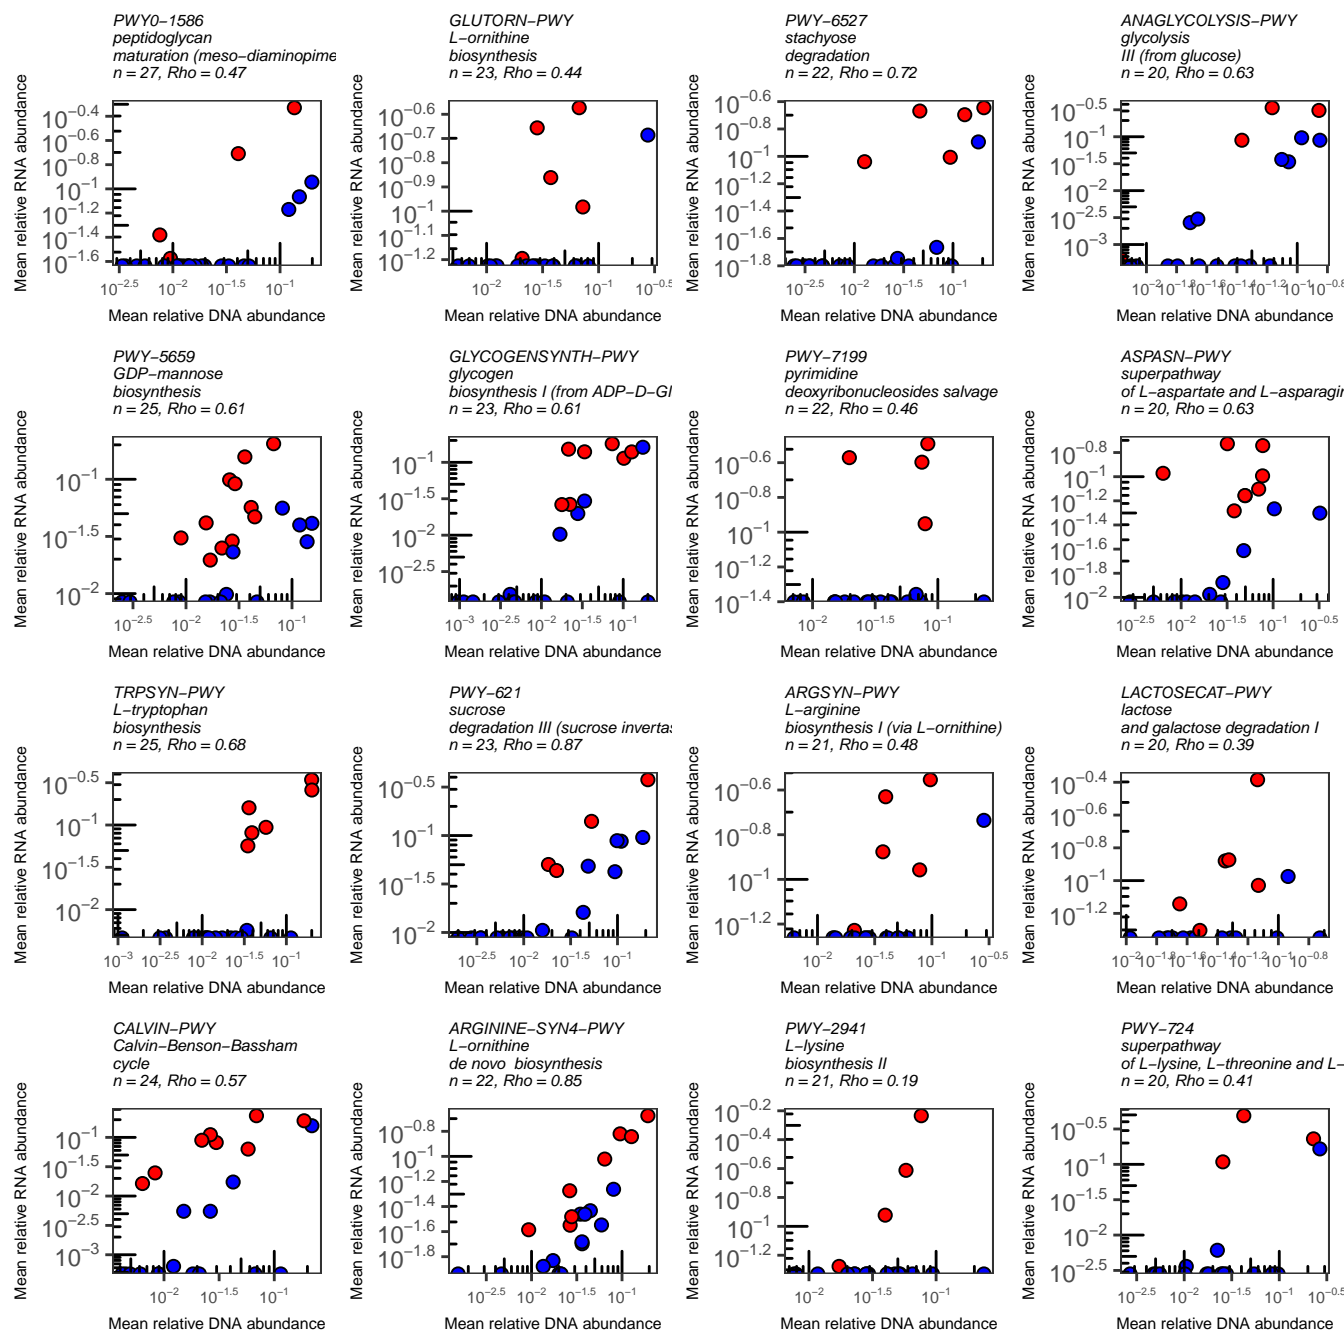

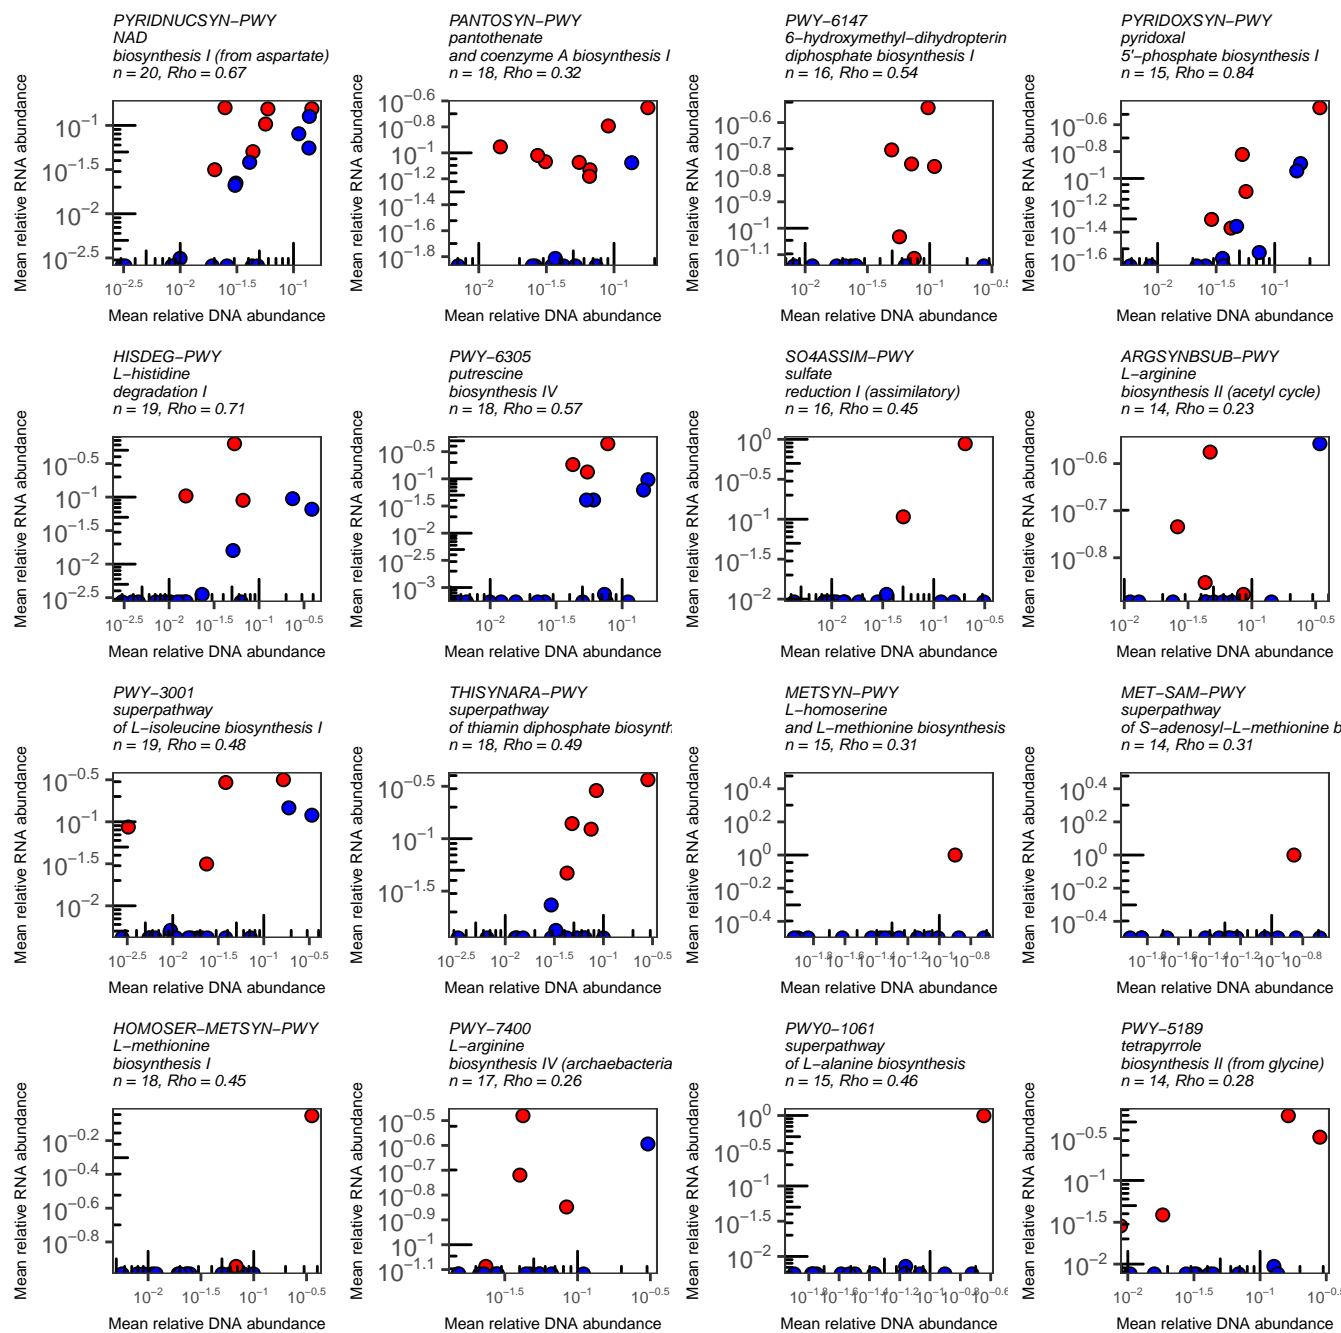

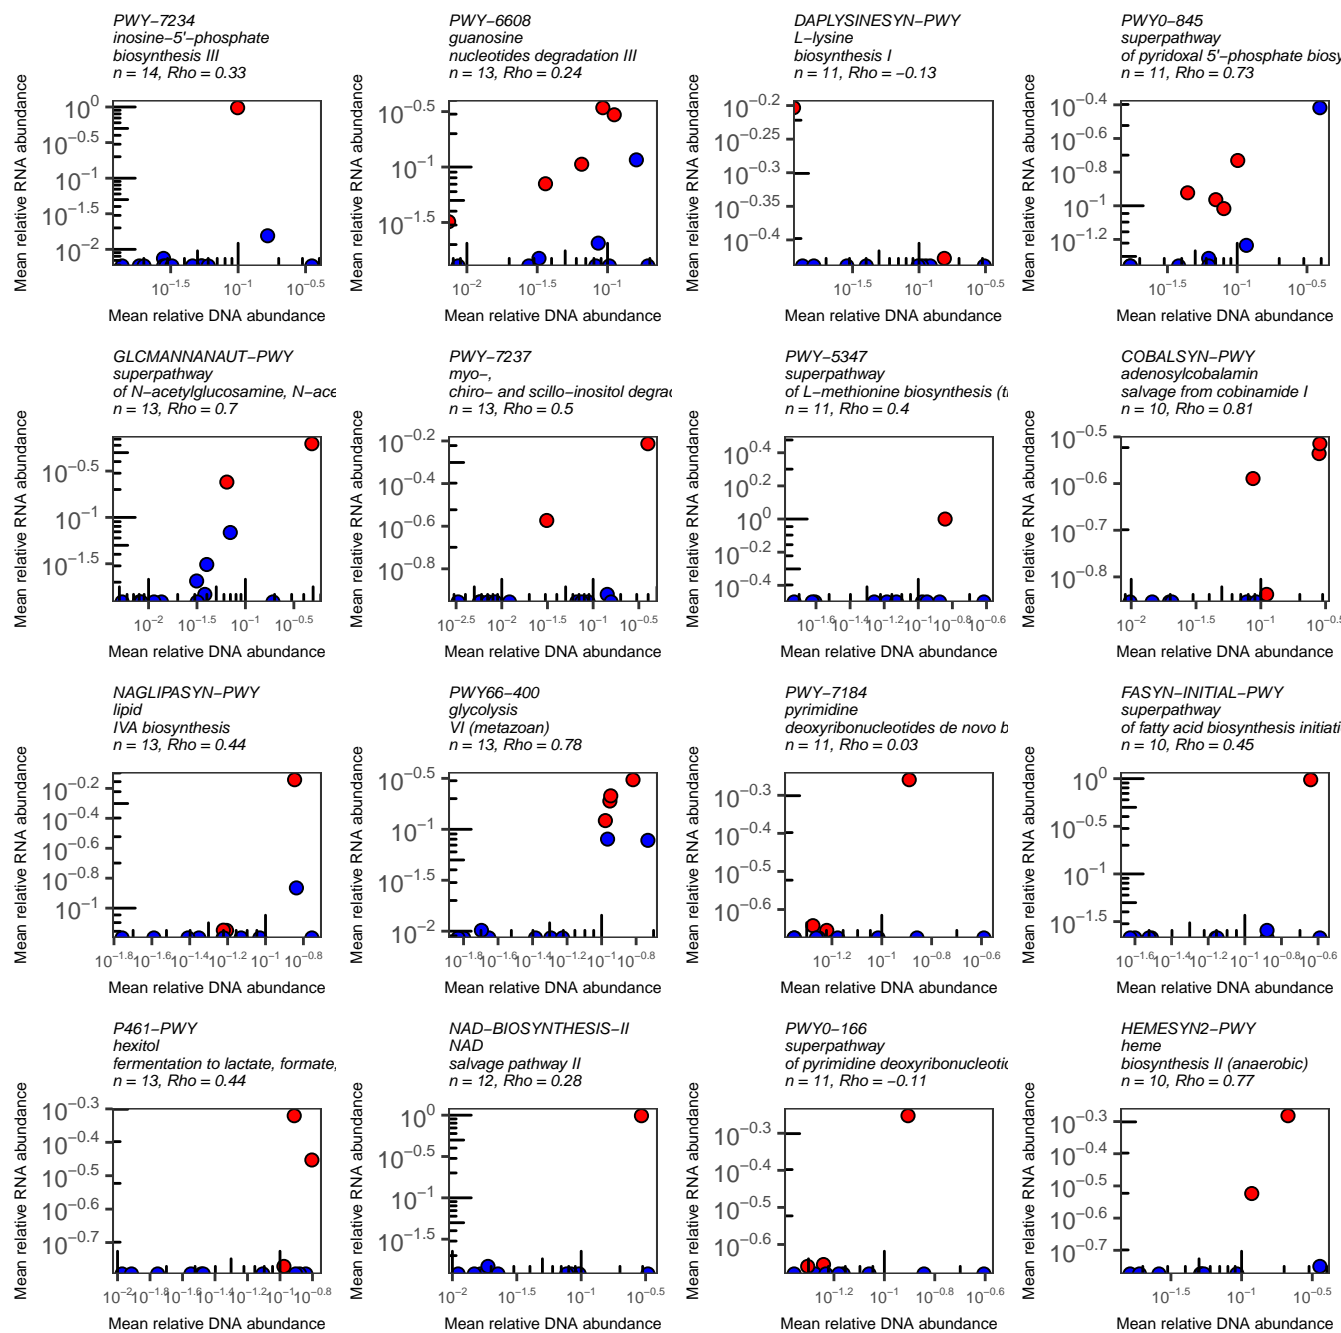



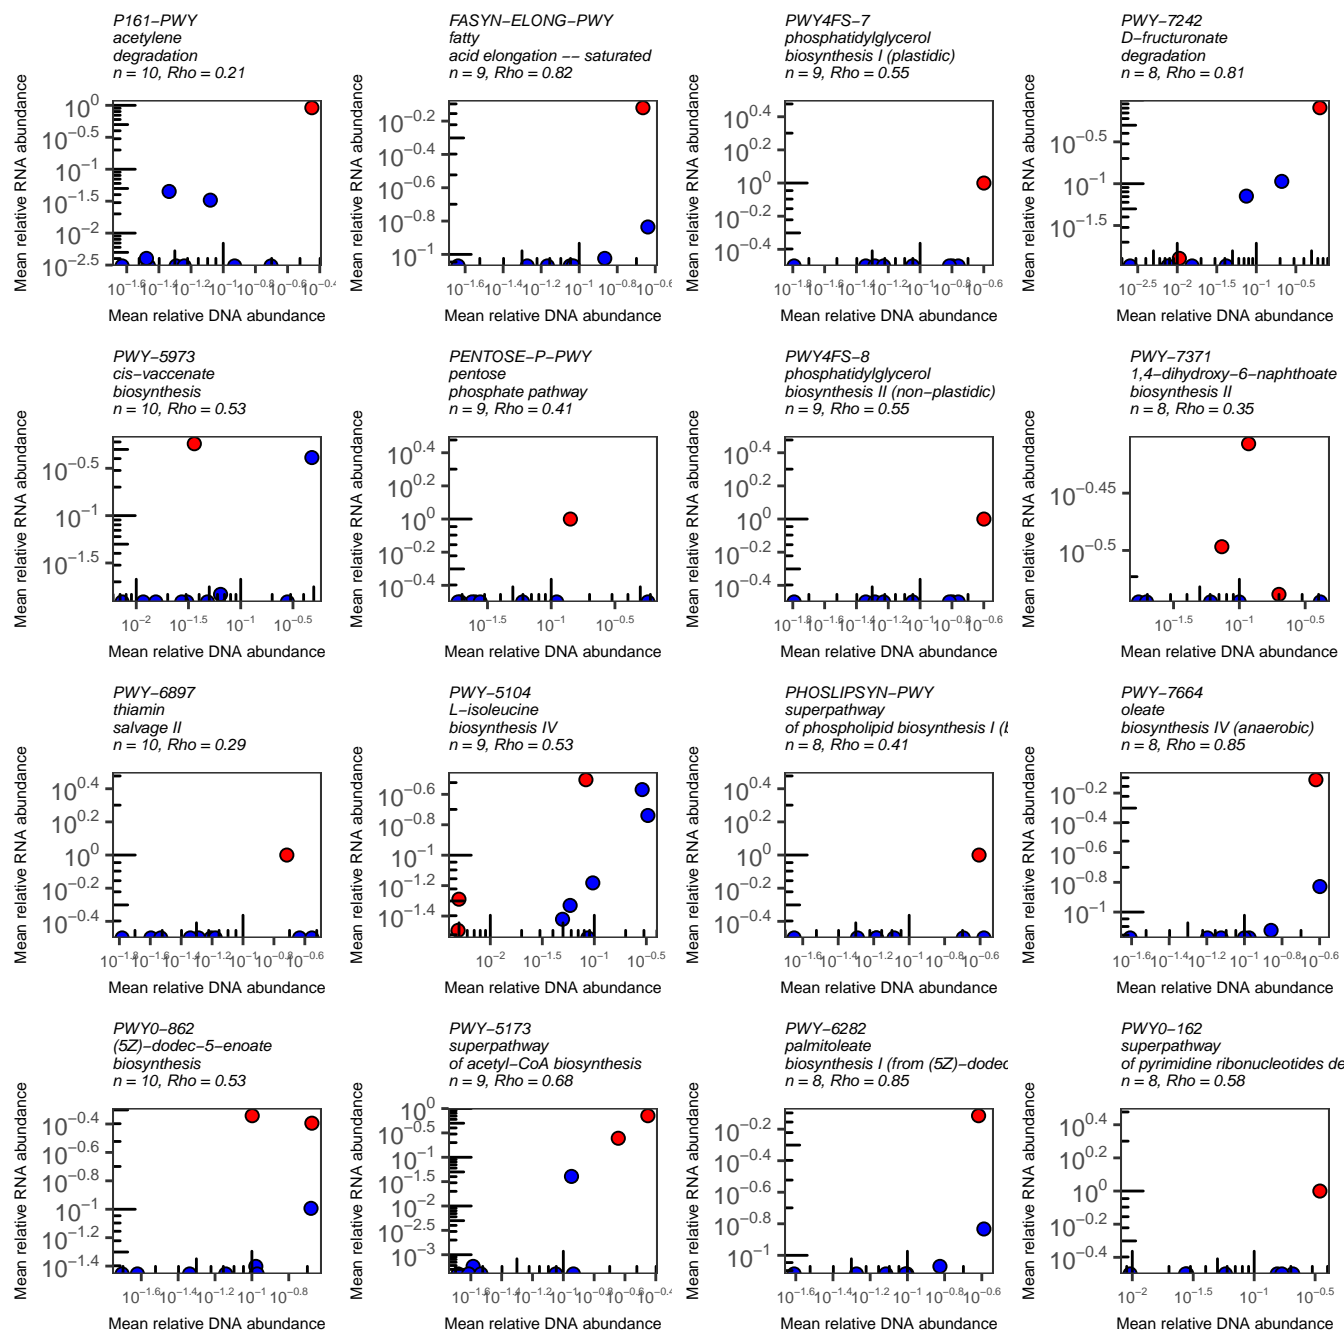

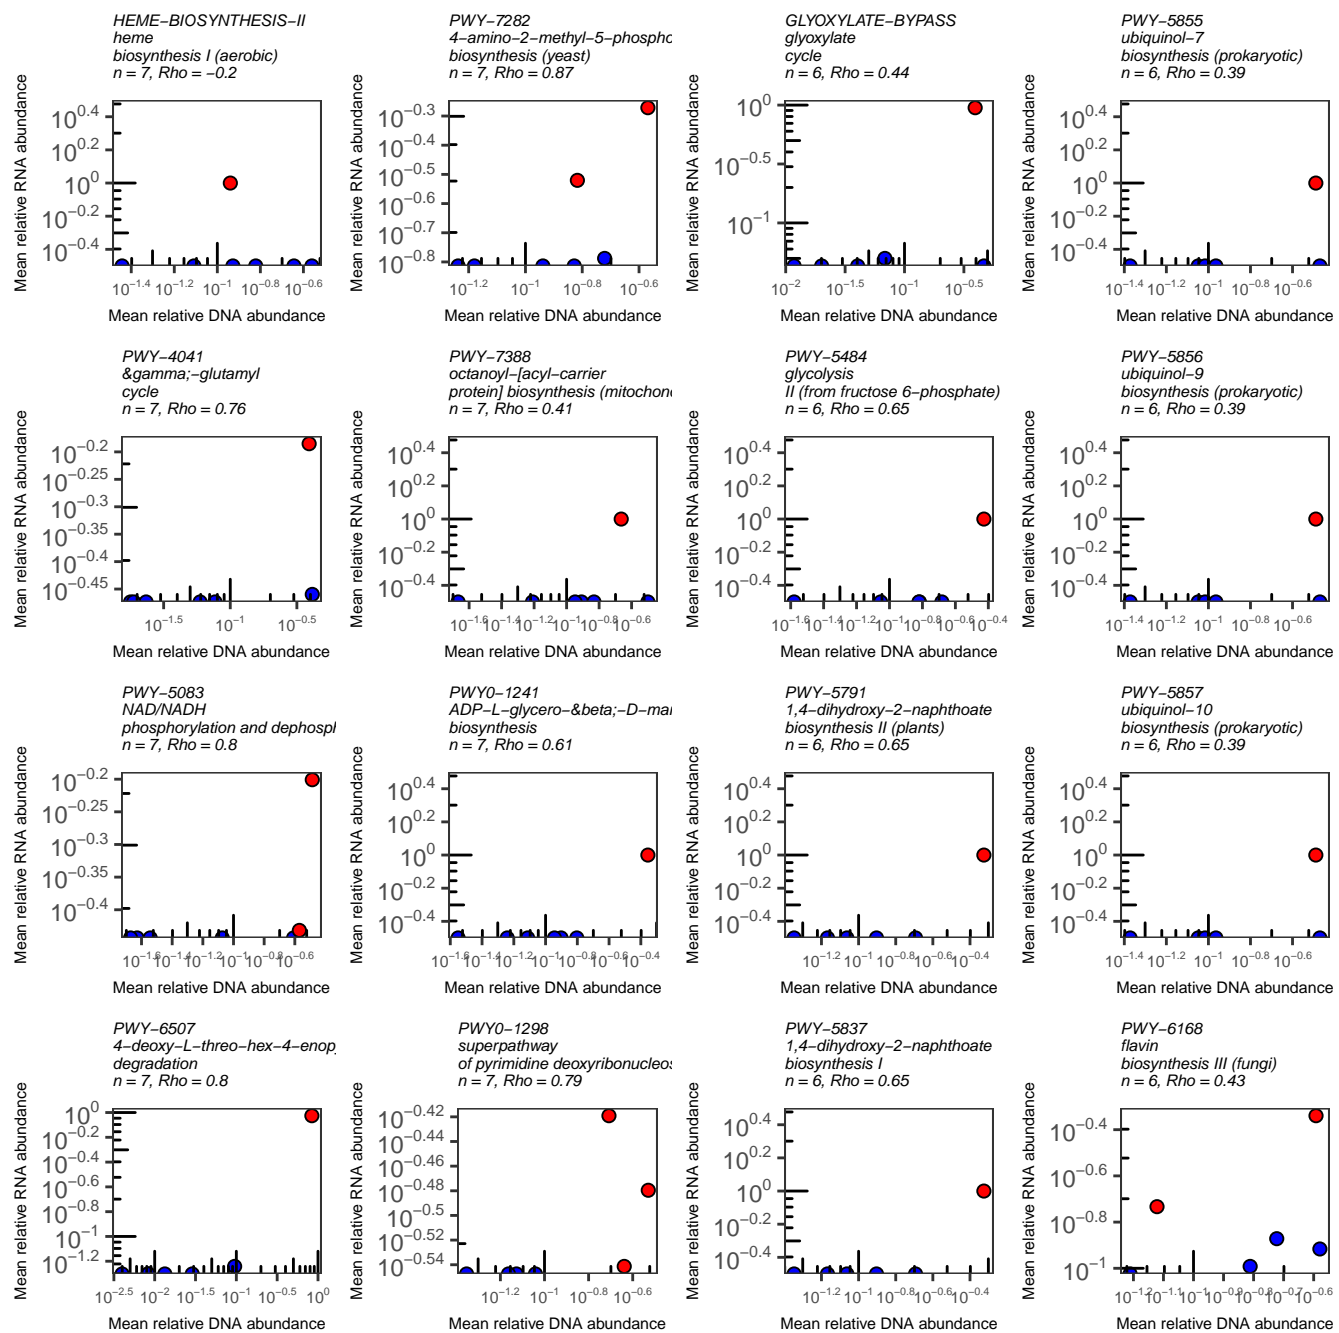

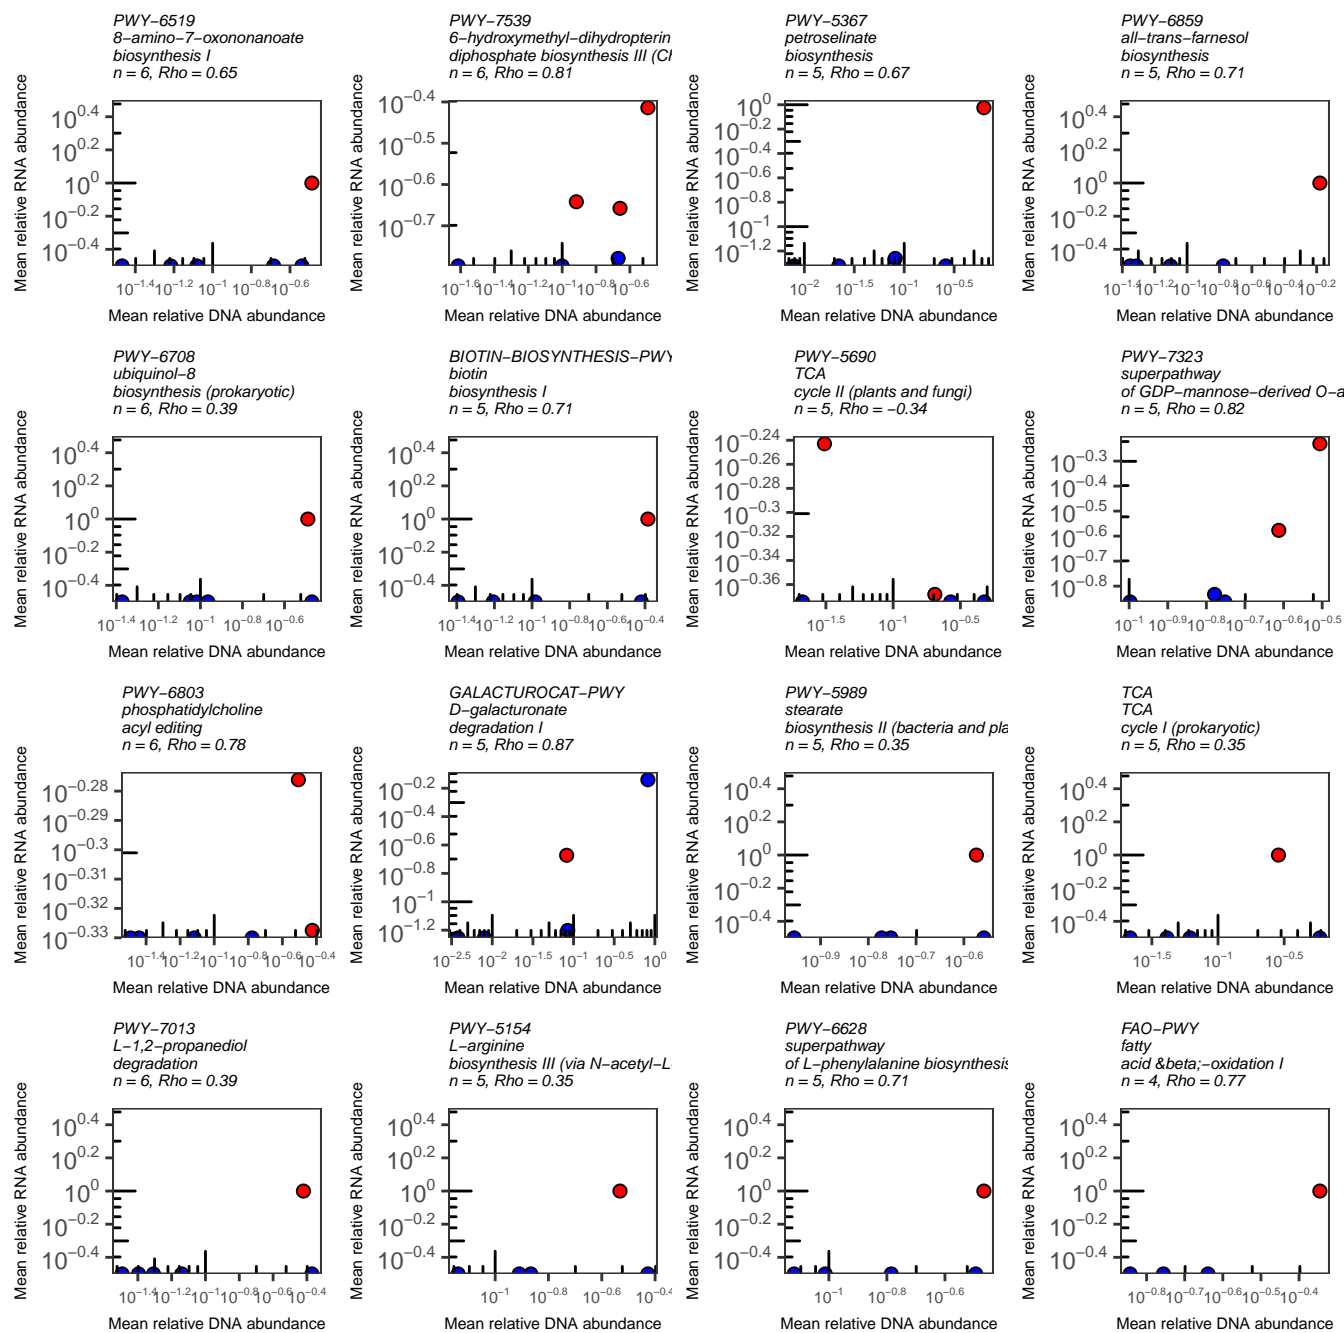

**FUCCAT-PWY**  
fucose  
degradation  
 $n = 4, Rho = 0.21$

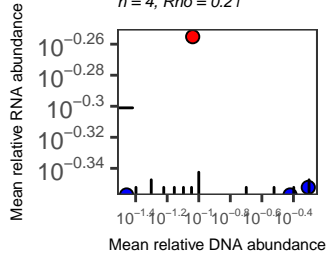

**PWY-5384**  
sucrose  
degradation IV (sucrose phospho)  
 $n = 4, Rho = 0.95$

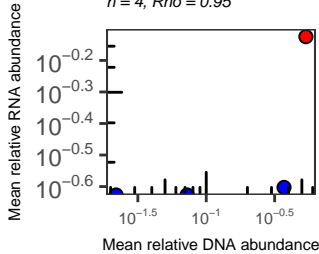

**TCA-GLYOX-BYPASS**  
superpathway  
of glyoxylate bypass and TCA  
 $n = 4, Rho = 0.77$

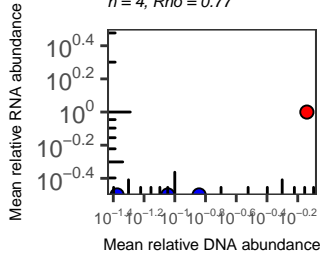

**PWY-6270**  
isoprene  
biosynthesis I  
 $n = 3, Rho = 0.87$

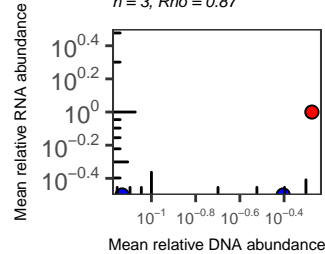

**GLUCOSE1PMETAB-PWY**  
glucose  
and glucose-1-phosphate degi  
 $n = 4, Rho = 0.77$

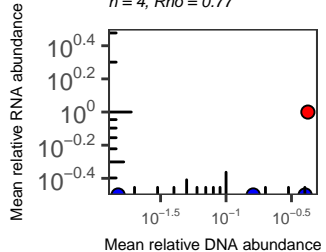

**PWY-7456**  
mannan  
degradation  
 $n = 4, Rho = 0.4$

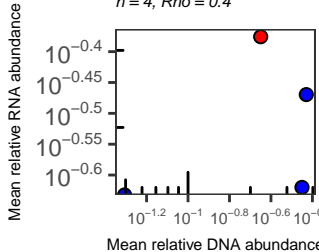

**HCAMHPDEG-PWY**  
3-phenylpropanoate  
and 3-(3-hydroxyphenyl)propa  
 $n = 3, Rho = 0.87$

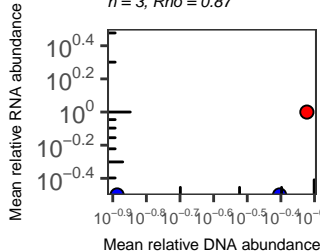

**PWY-6612**  
superpathway  
of tetrahydrofolate biosynthesis  
 $n = 3, Rho = 0.87$

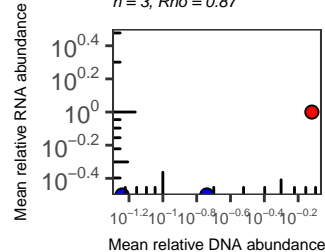

**PWY-4984**  
urea  
cycle  
 $n = 4, Rho = 0.77$

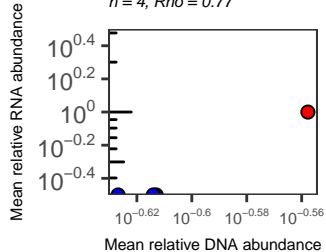

**PWY-7560**  
methylerythritol  
phosphate pathway II  
 $n = 4, Rho = 0.77$

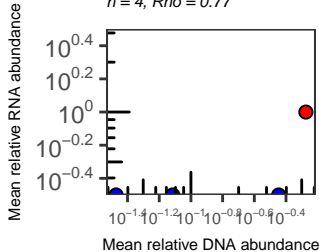

**PWY-3781**  
aerobic  
respiration I (cytochrome c)  
 $n = 3, Rho = 0.87$

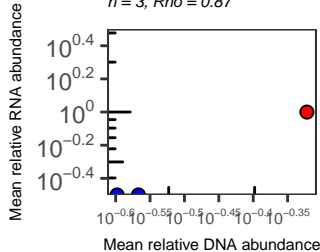

**PWY-6690**  
cinnamate  
and 3-hydroxycinnamate degra  
 $n = 3, Rho = 0.87$

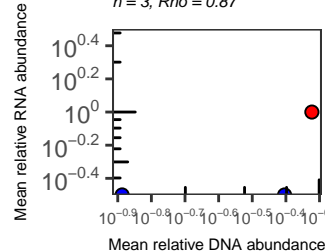

**PWY-5138**  
unsaturated,  
even numbered fatty acid & beta  
 $n = 4, Rho = 0.77$

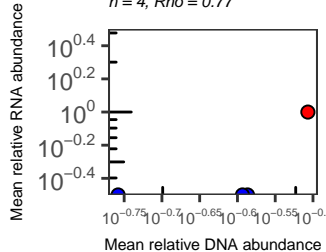

**PWY0-1479**  
tRNA  
processing  
 $n = 4, Rho = 1$

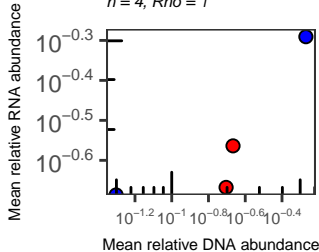

**PWY-5136**  
fatty  
acid & beta;-oxidation II (peroxi  
 $n = 3, Rho = 0.87$

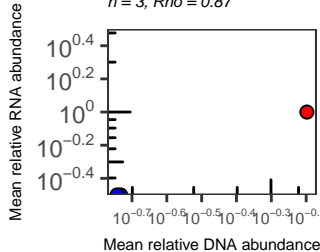

**SALVADEHYPOX-PWY**  
adenosine  
nucleotides degradation II  
 $n = 3, Rho = 0.5$

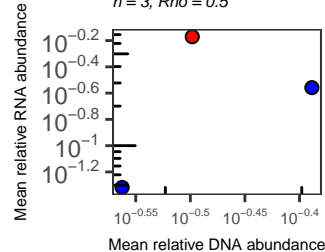

**7ALPHADEHYDROX-PWY**  
*cholate degradation (bacteria, anaerol*  
*n = 2, Rho = 1*

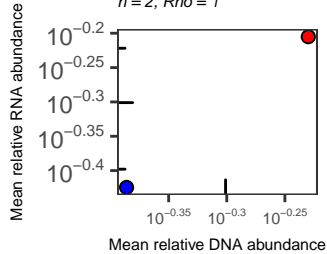

**GLYCOL-GLYOXDEG-PWY**  
*superpathway of glycol metabolism and degra*  
*n = 2, Rho = 1*

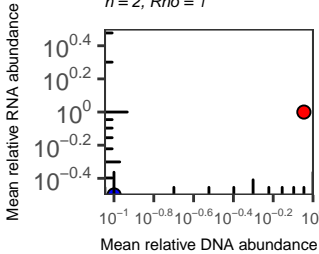

**PWY-4702**  
*phytate degradation I*  
*n = 2, Rho = -1*

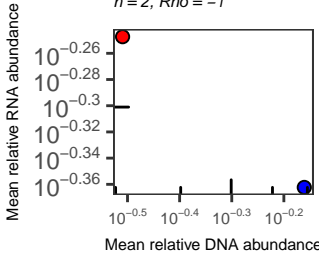

**PWY-6588**  
*pyruvate fermentation to acetone*  
*n = 2, Rho = 1*

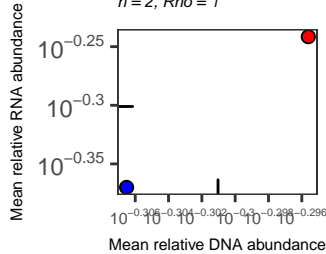

**FOLSYN-PWY**  
*superpathway of tetrahydrofolate biosynthesis*  
*n = 2, Rho = 1*

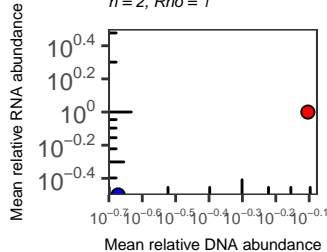

**GLYCOLYSIS**  
*glycolysis I (from glucose 6-phosphate)*  
*n = 2, Rho = 1*

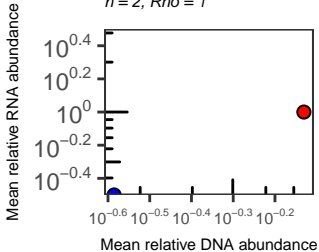

**PWY-5101**  
*L-isoleucine biosynthesis II*  
*n = 2, Rho = 1*

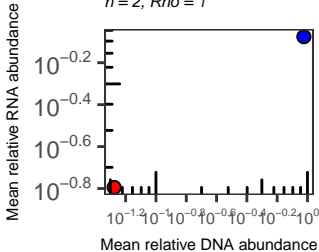

**PWY-6630**  
*superpathway of L-tyrosine biosynthesis*  
*n = 2, Rho = 1*

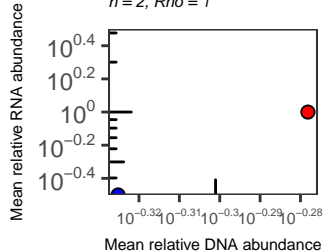

**GALACT-GLUCUROCAT-PWY**  
*superpathway of hexuronide and hexuronate c*  
*n = 2, Rho = 1*

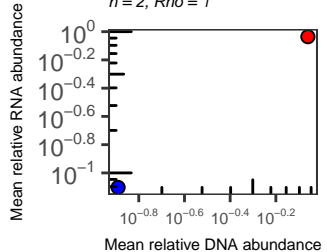

**METHANOGENESIS-PWY**  
*methanogenesis from H2 and CO2*  
*n = 2, Rho = 1*

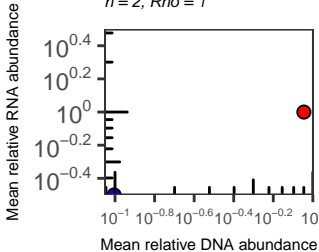

**PWY-5177**  
*glutaryl-CoA degradation*  
*n = 2, Rho = 1*

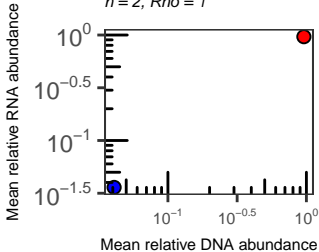

**PWY-7269**  
*NAD/NADP-NADH/NADPH mitochondrial interconversion (y*  
*n = 2, Rho = 1*

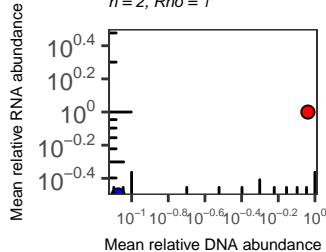

**GLUCUROCAT-PWY**  
*superpathway of &beta;-D-glucuronide and D*  
*n = 2, Rho = 1*

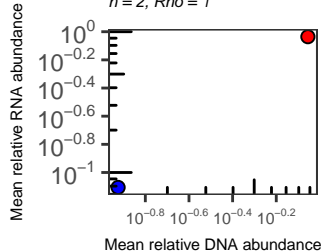

**PWY-2723**  
*trehalose degradation V*  
*n = 2, Rho = 1*

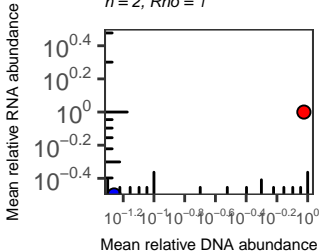

**PWY-5198**  
*factor 420 biosynthesis*  
*n = 2, Rho = 1*

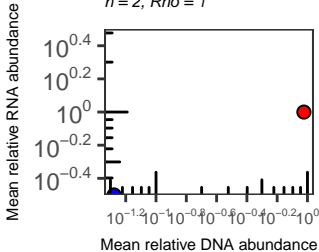

**PWY-7315**  
*dTDP-N-acetylthomosamine biosynthesis*  
*n = 2, Rho = 1*

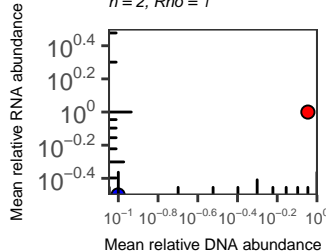

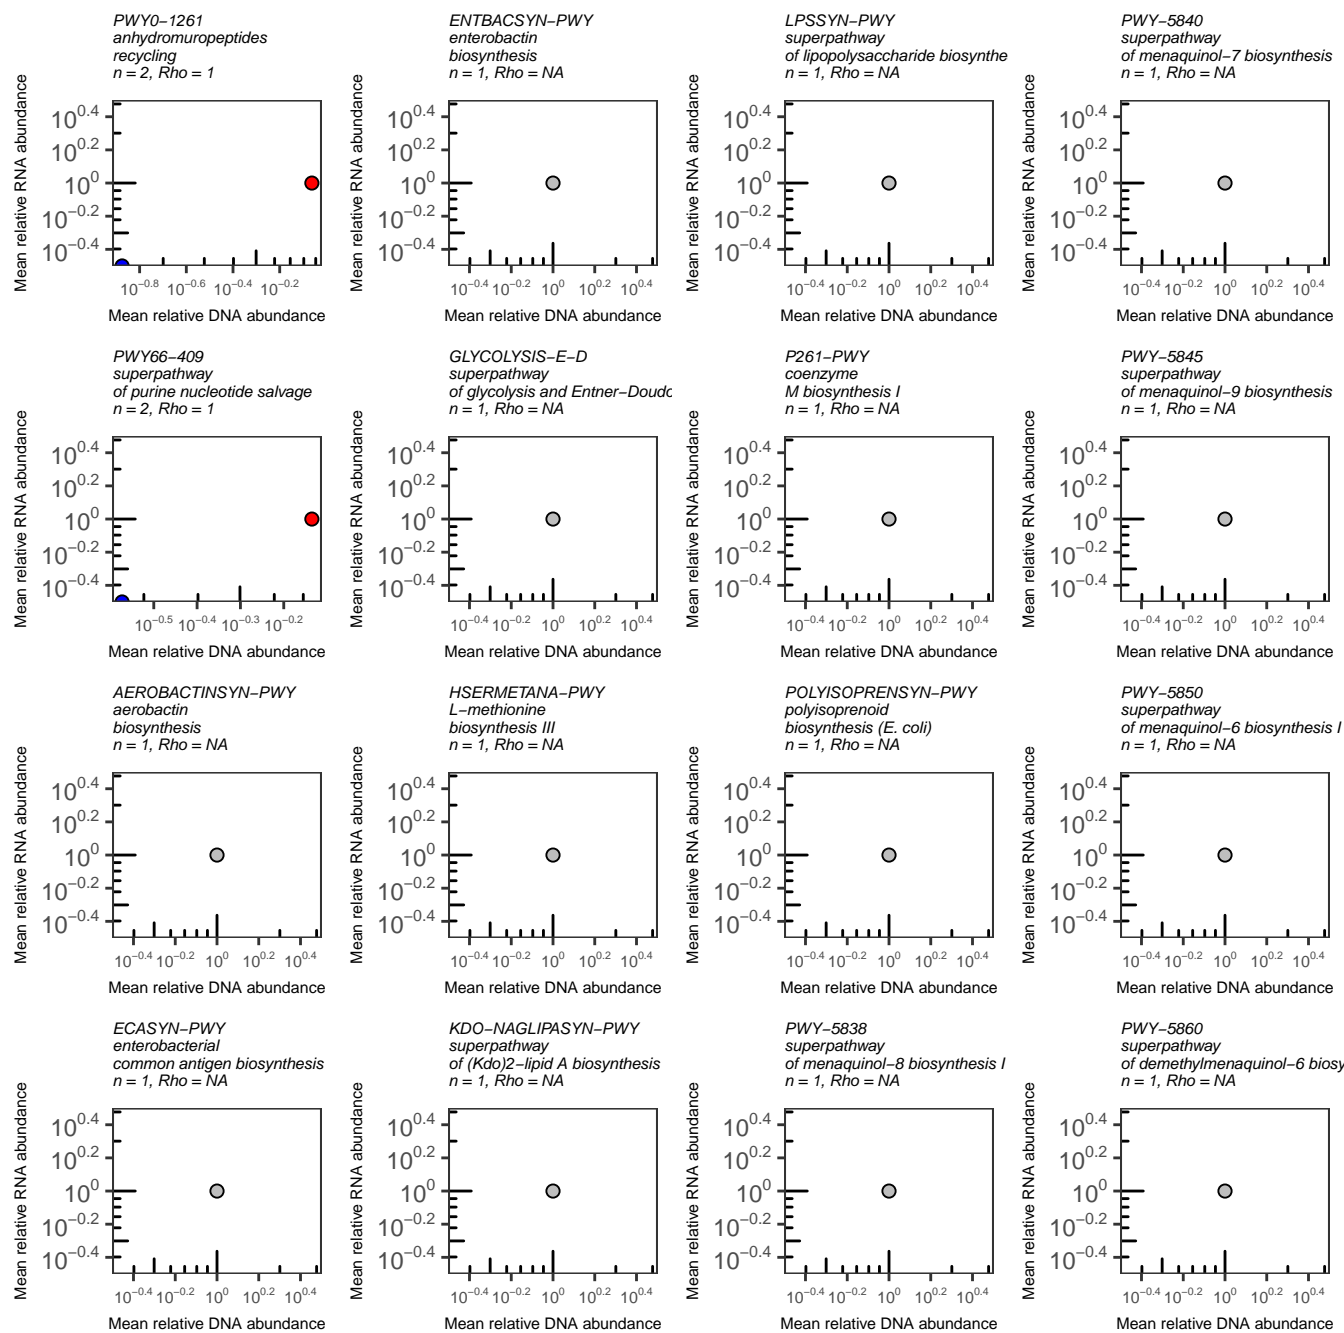

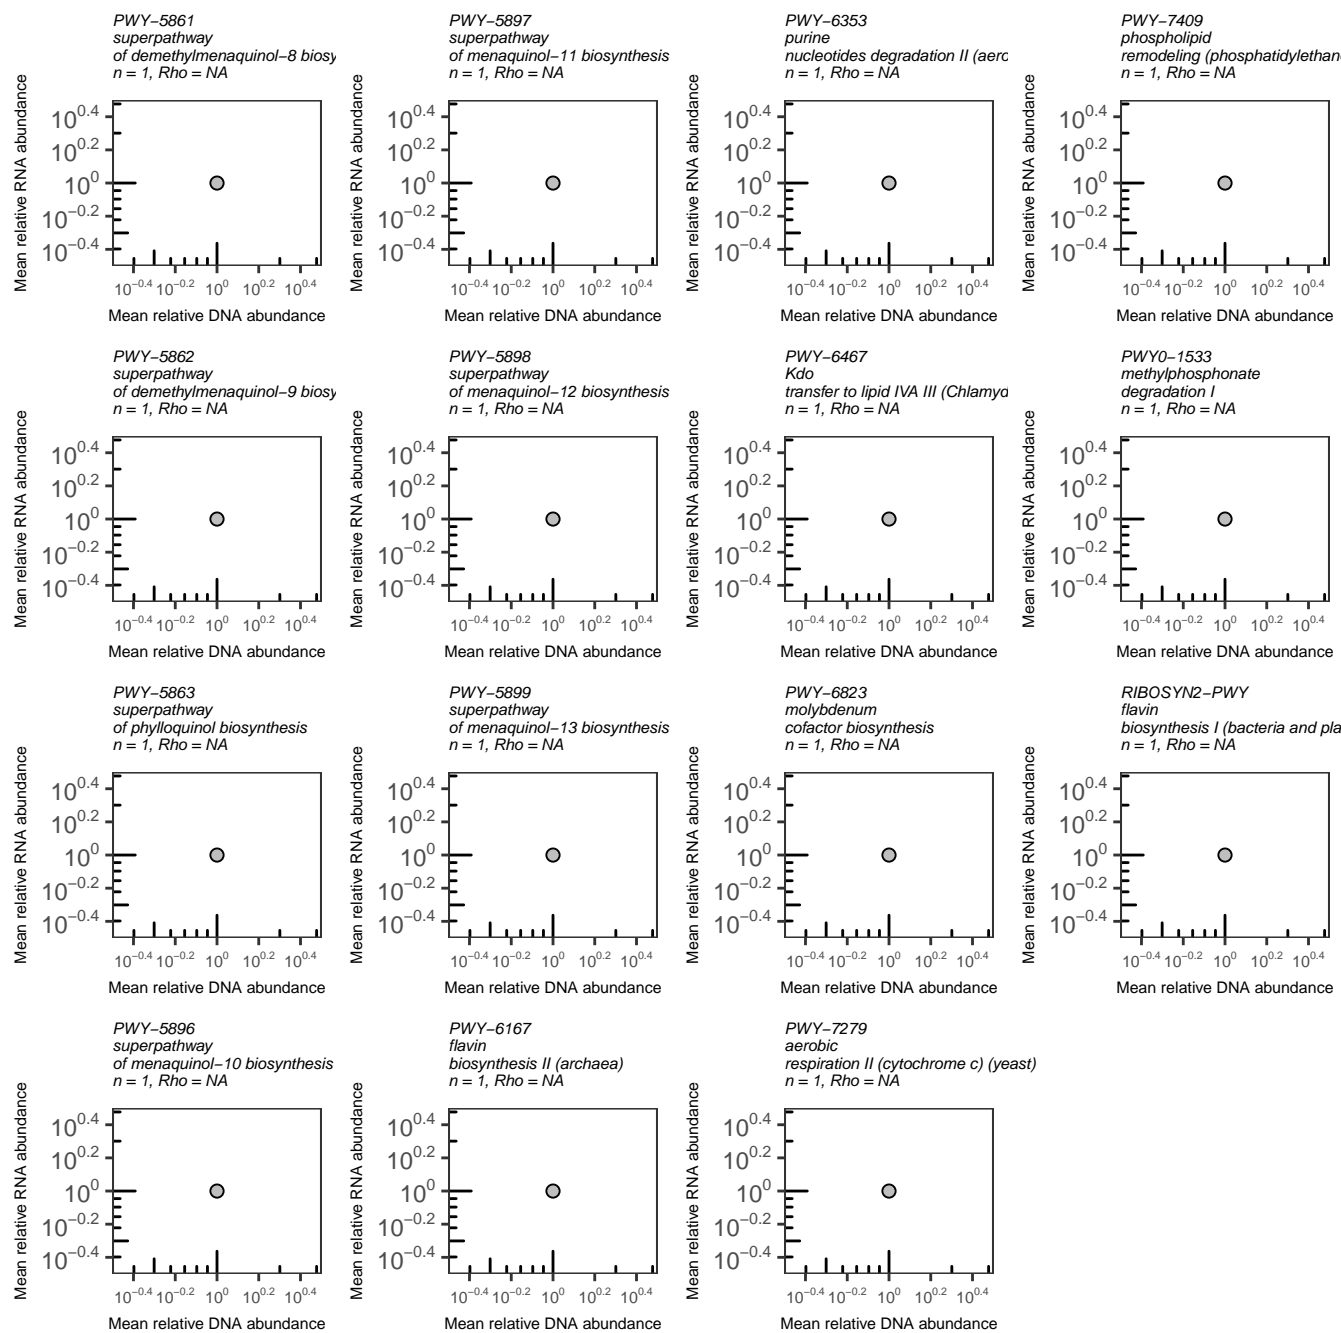

Supplement: NIHMS922671-supplement-Supplementary_Figure_7.pdf [file NIHMS922671-supplement-Supplementary_Figure_7.pdf]
