# Supplementary material
Source: PubMed Central journal article supplement (PMC6557121)

# METHANOGENESIS-PWY: methanogenesis from H2 and CO2

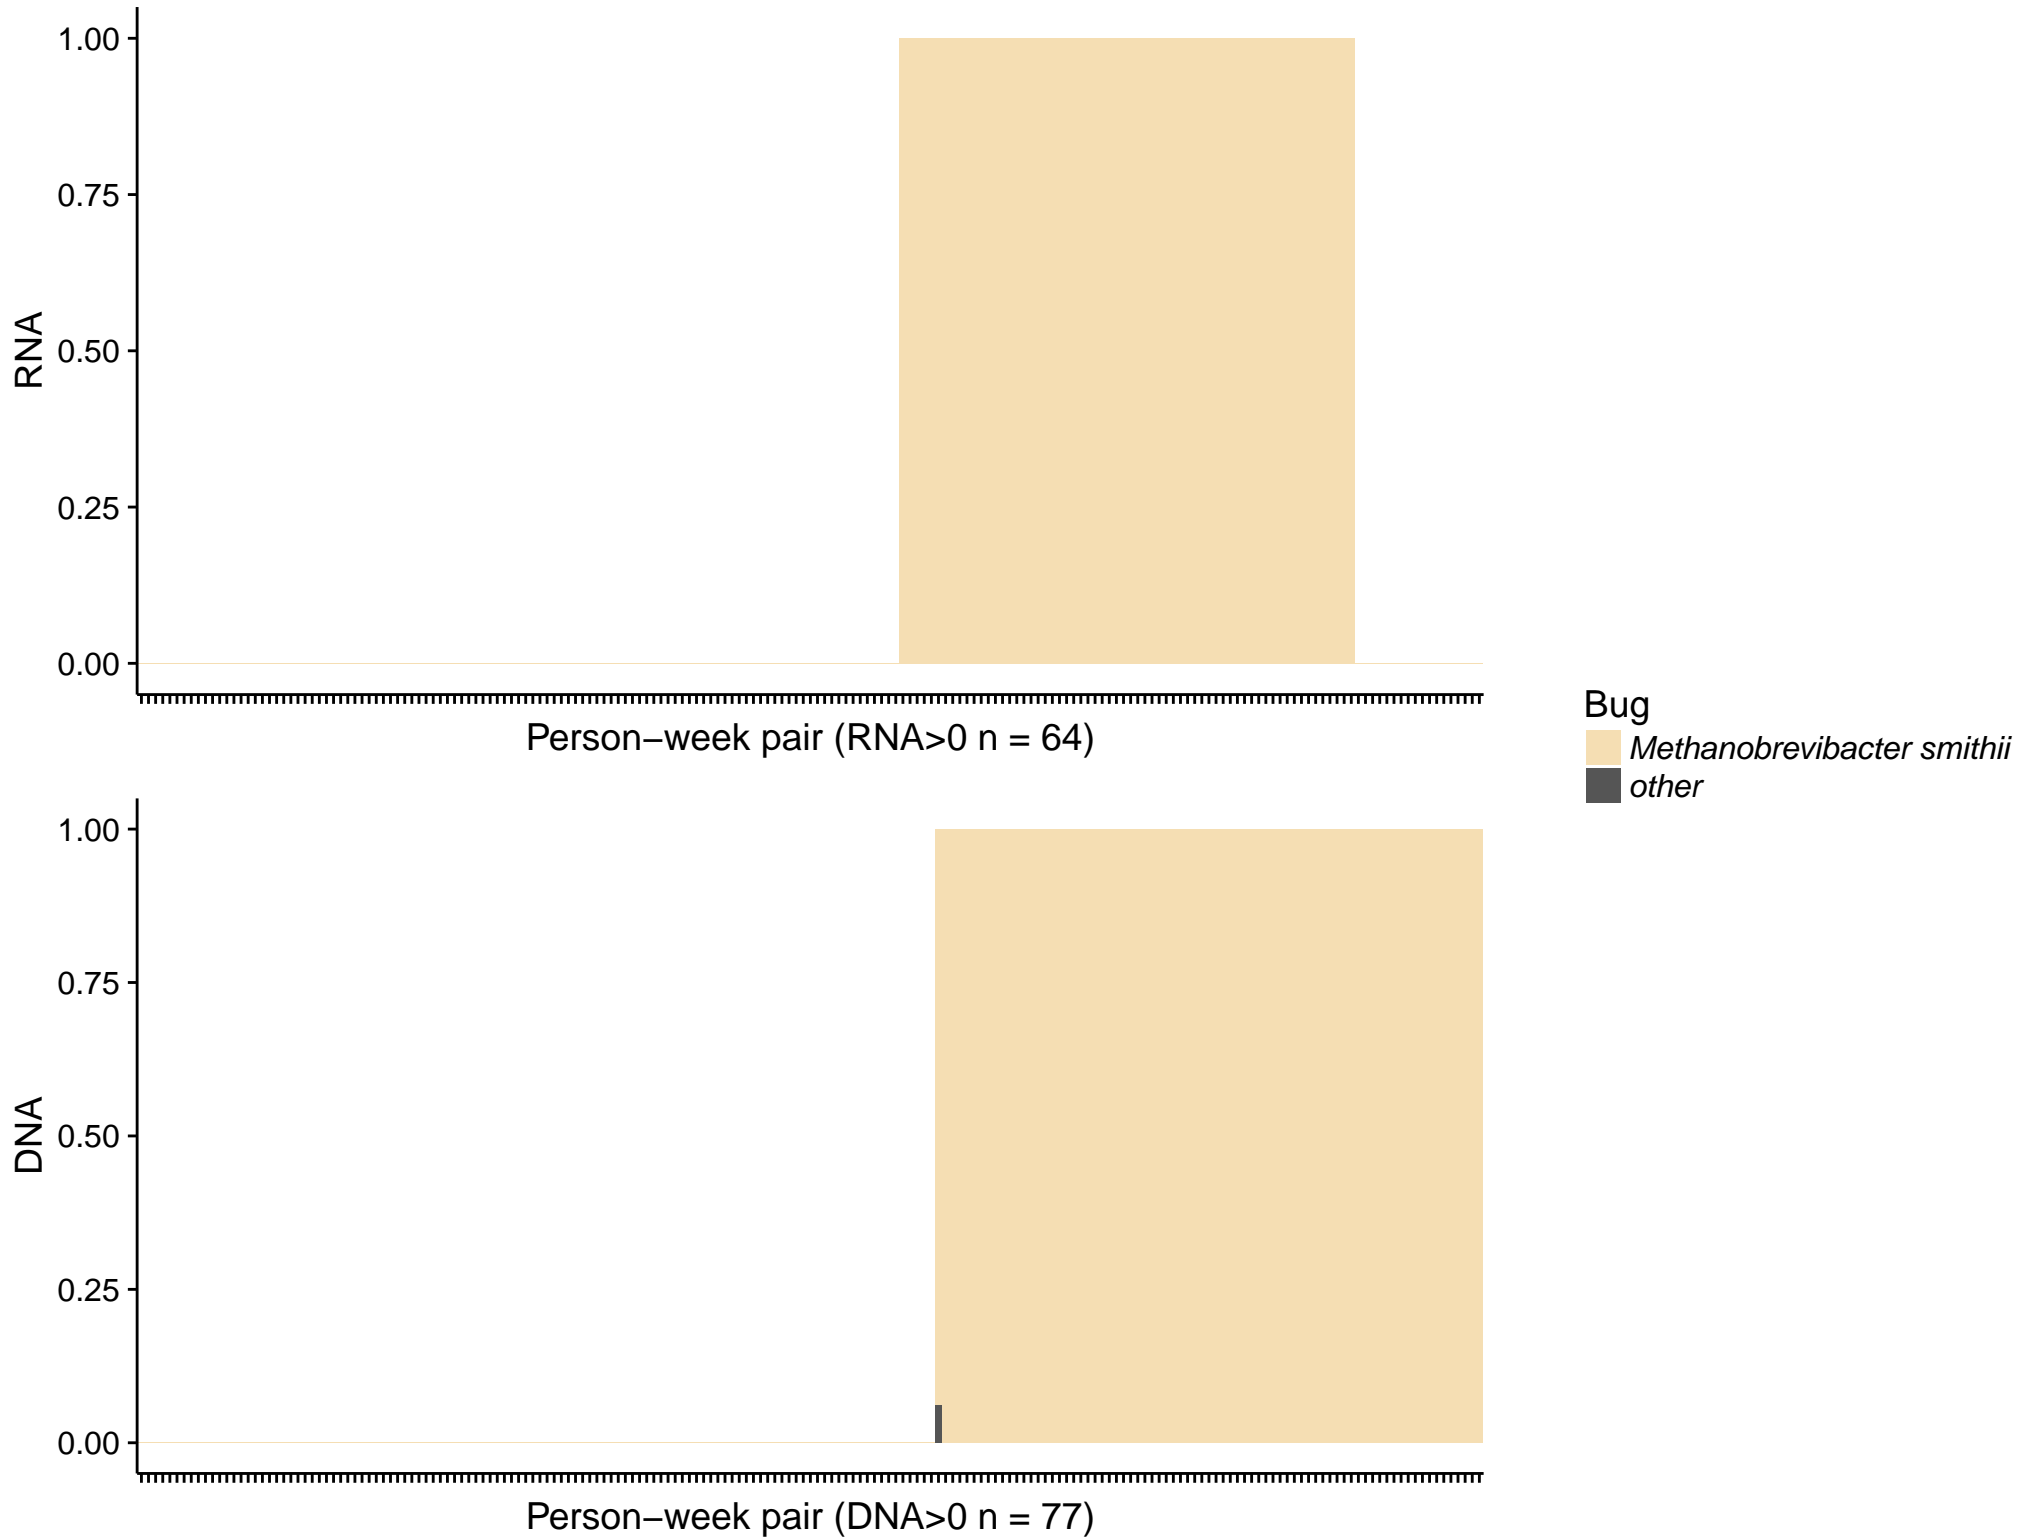

# HSERMETANA-PWY: L-methionine biosynthesis III

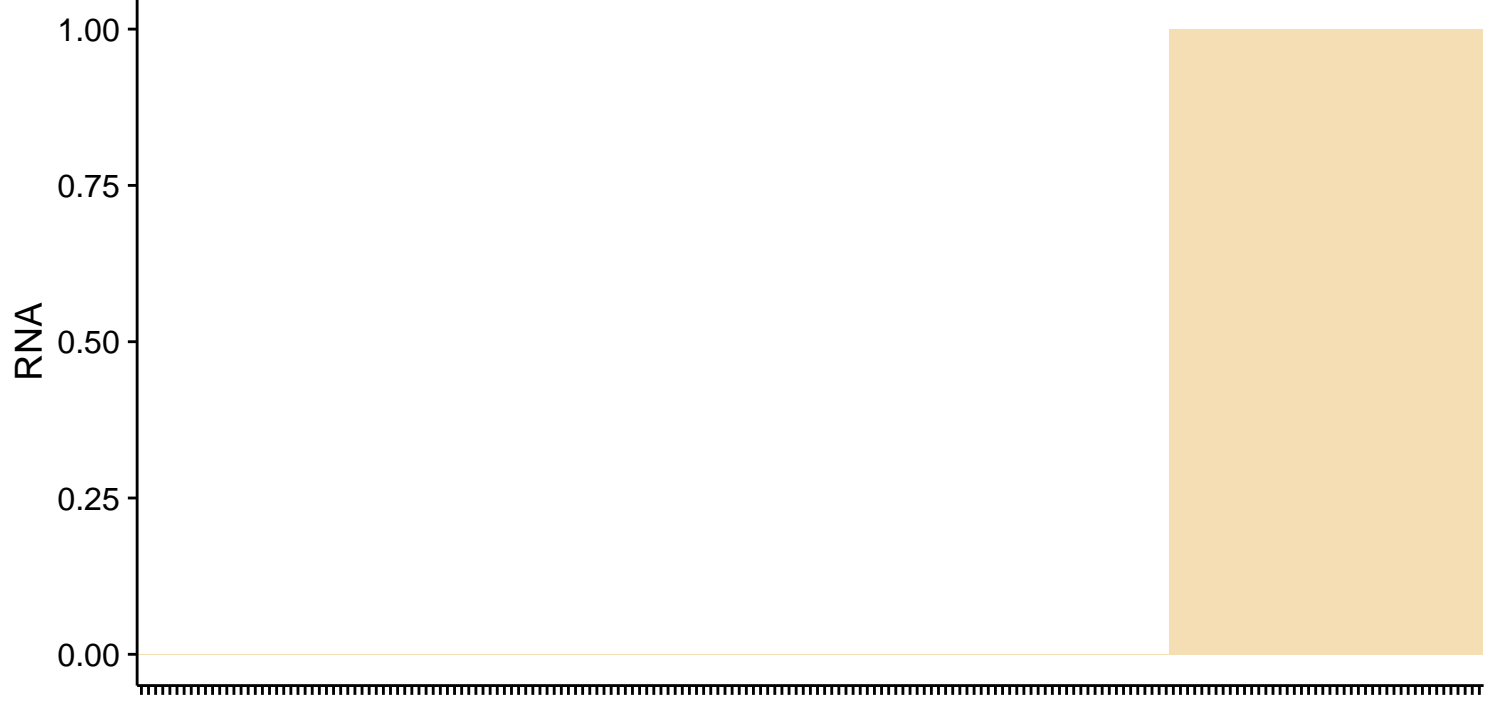

Person-week pair (RNA>0 n = 44)

Bug  
Methanobrevibacter smithii

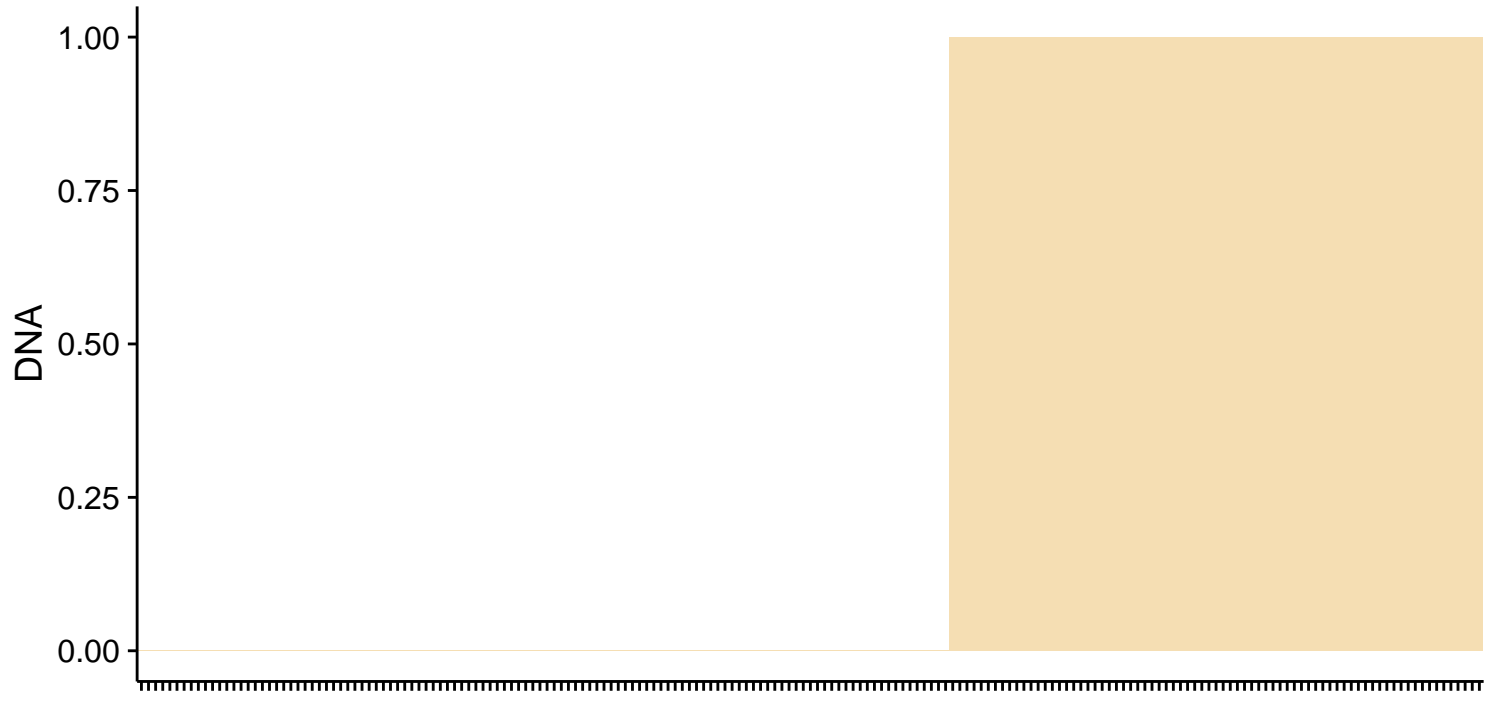

Person-week pair (DNA>0 n = 75)

# PWY-5101: L-isoleucine biosynthesis II

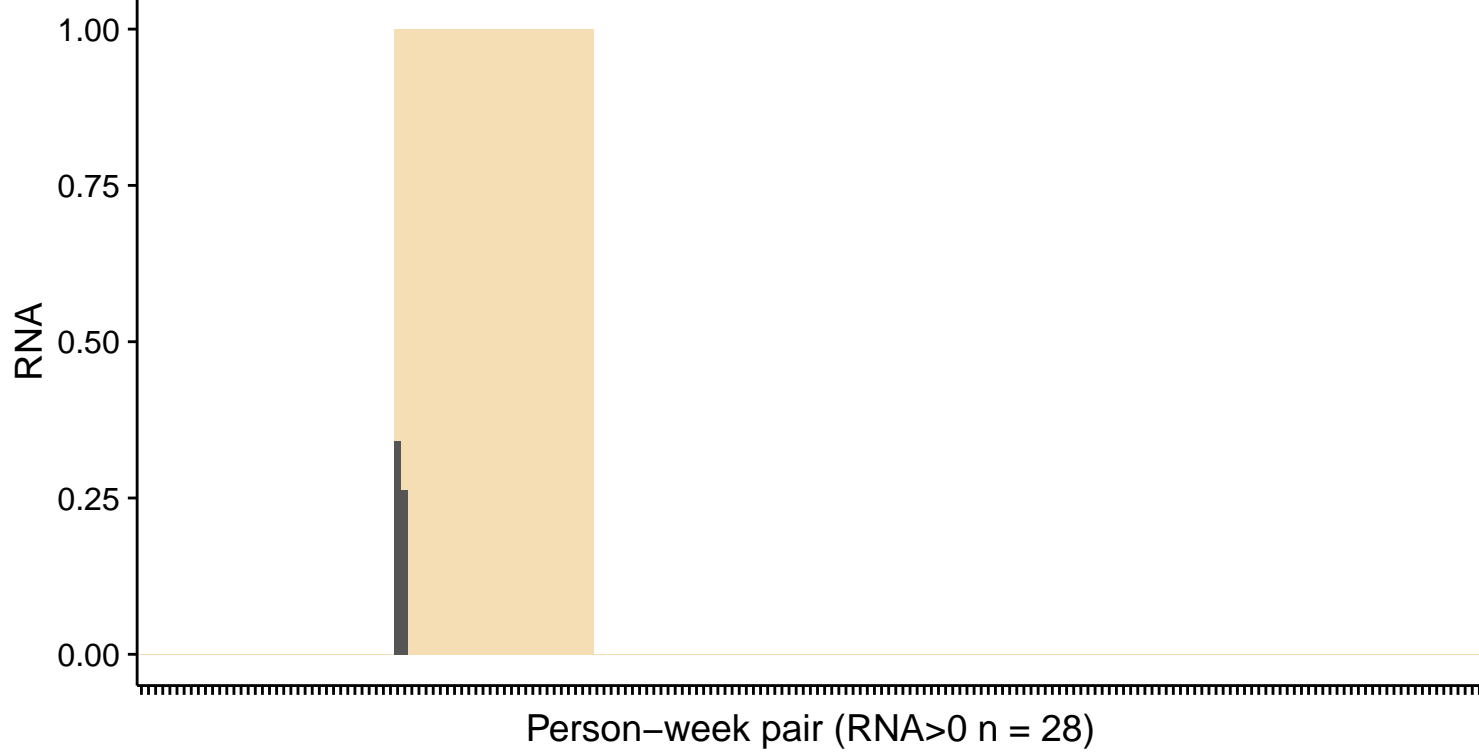

Bug  
*Methanobrevibacter smithii*  
other

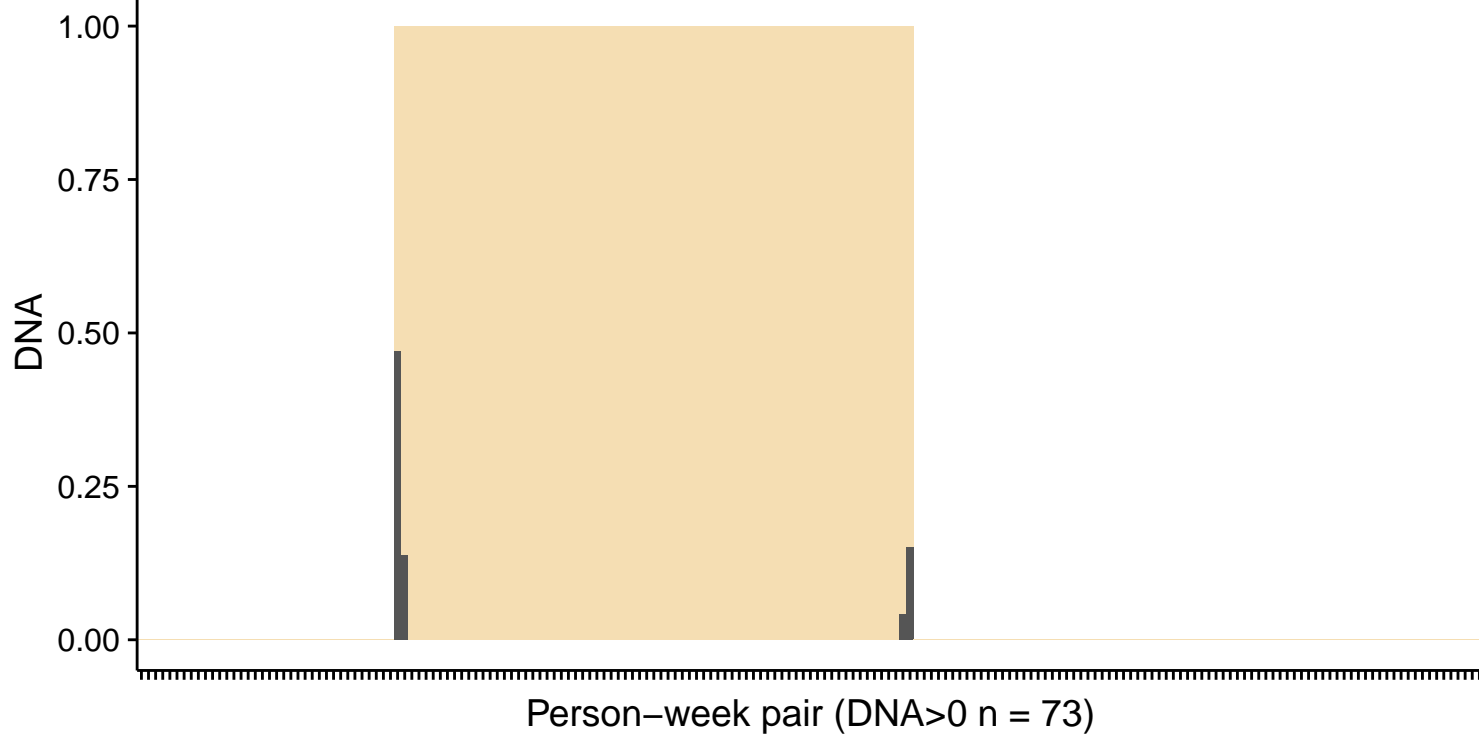

# PWY-5198: factor 420 biosynthesis

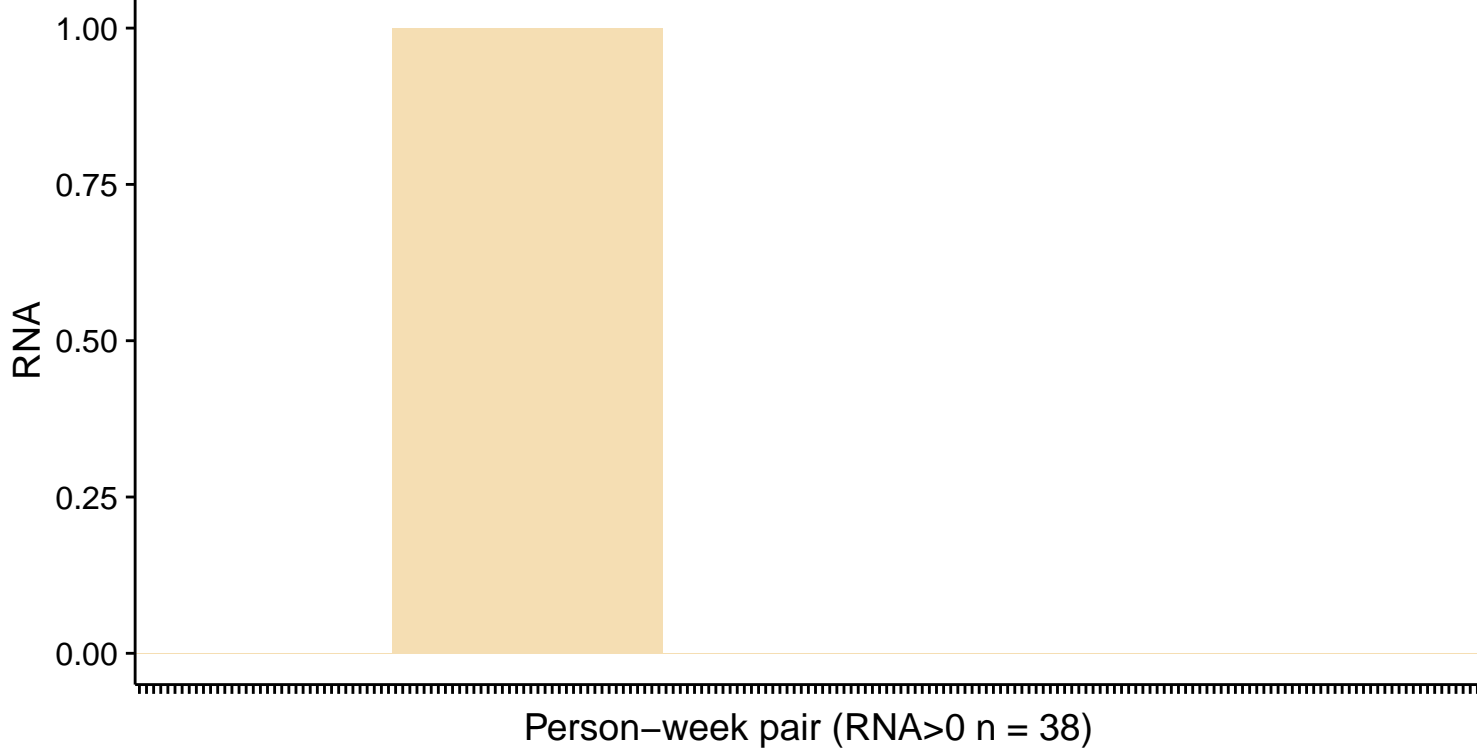

Bug  
■ *Methanobrevibacter smithii*  
■ other

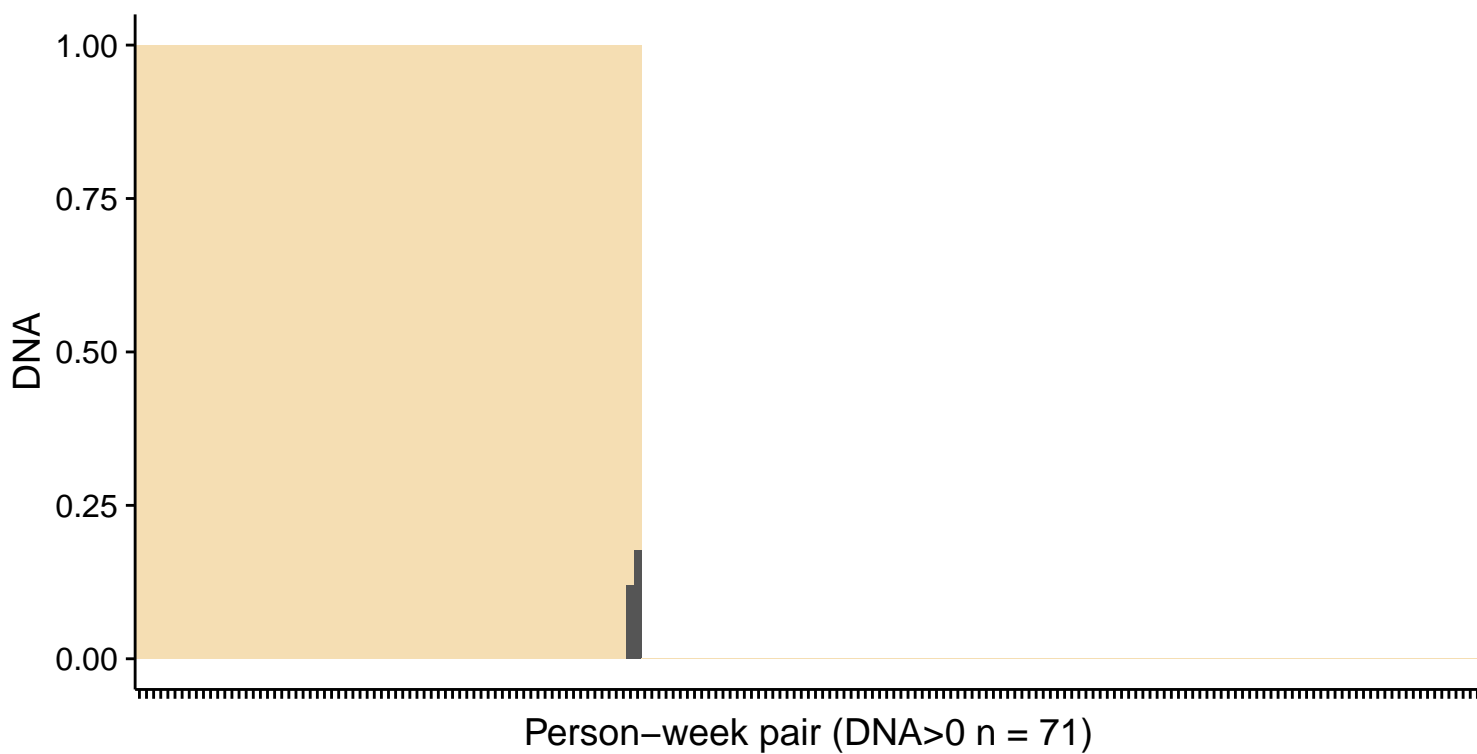

# PWY-7663: gondoate biosynthesis (anaerobic)

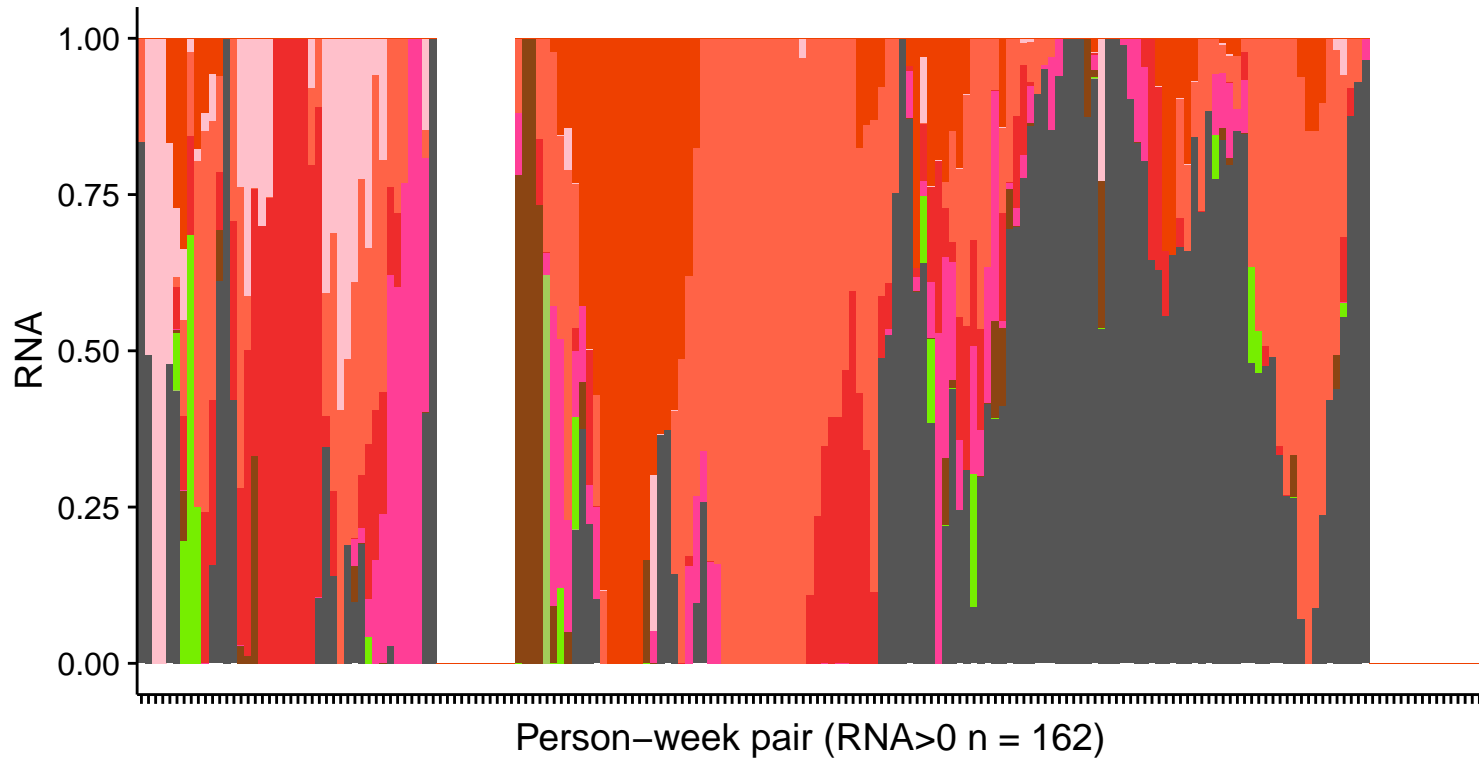

## Bug

- Bacteroides caccae*
- Bacteroides fragilis*
- Bacteroides ovatus*
- Bacteroides thetaiotaomicron*
- Bacteroides xylanisolvens*
- Odoribacter splanchnicus*
- Escherichia coli*
- Klebsiella pneumoniae*
- Haemophilus parainfluenzae*
- other

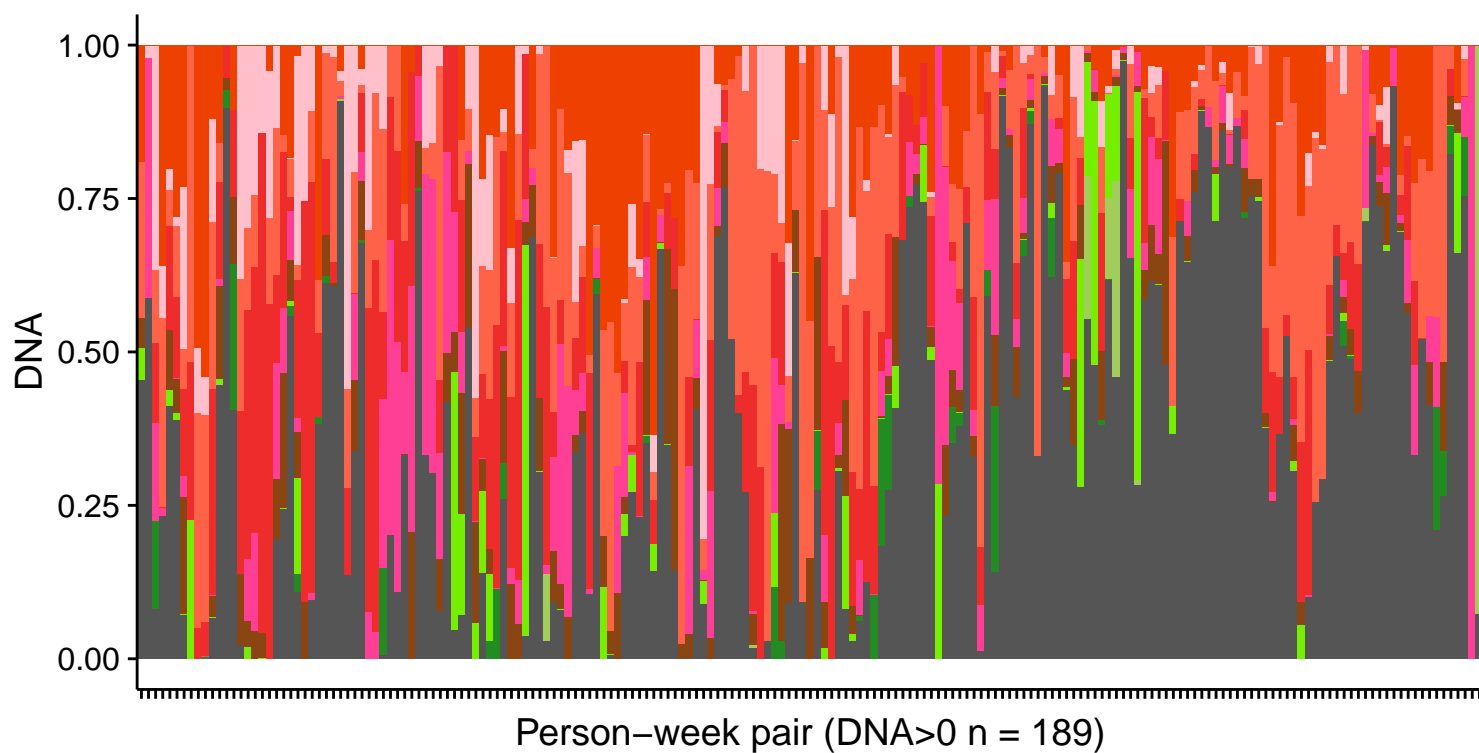

# HISDEG-PWY: L-histidine degradation I

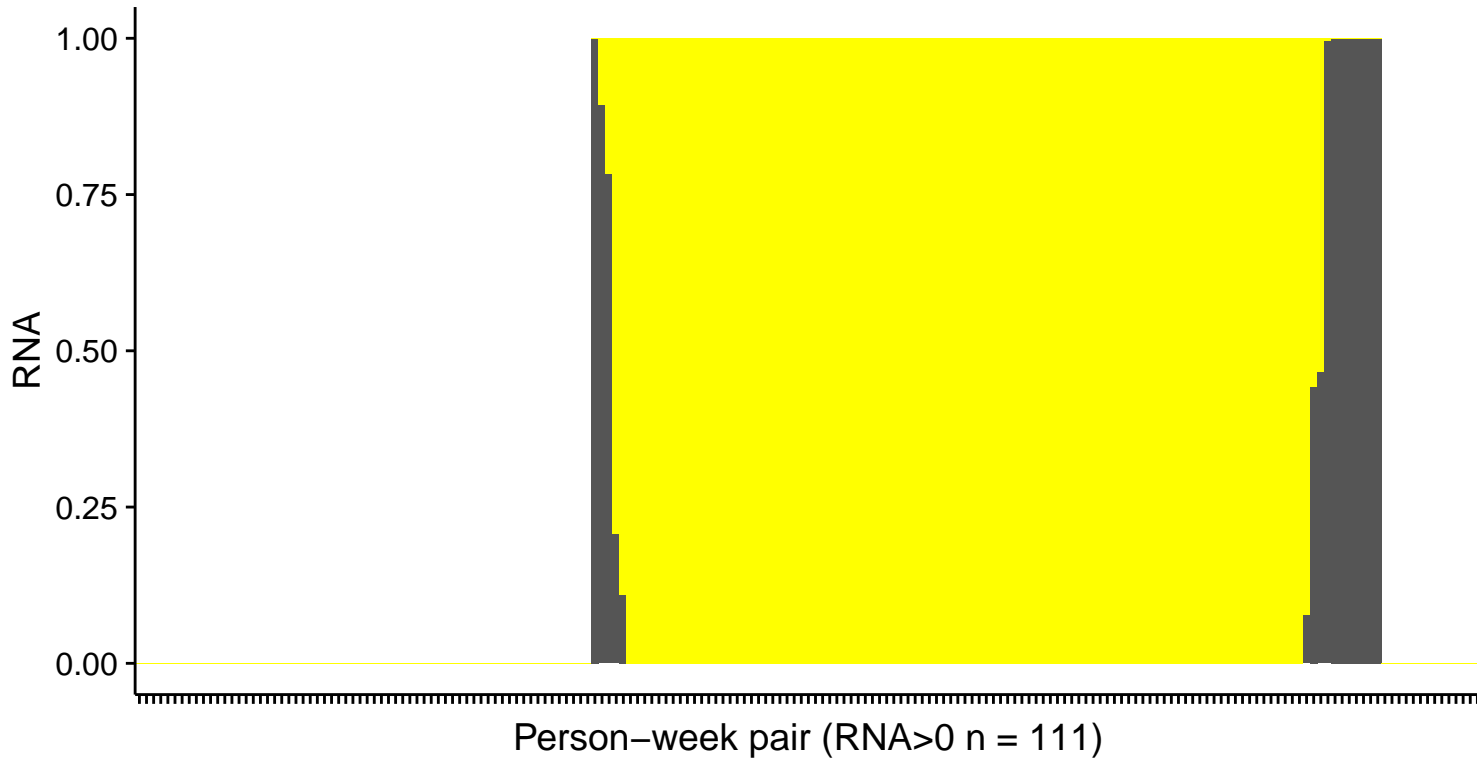

Bug

*Alistipes shahii*

*Klebsiella pneumoniae*

other

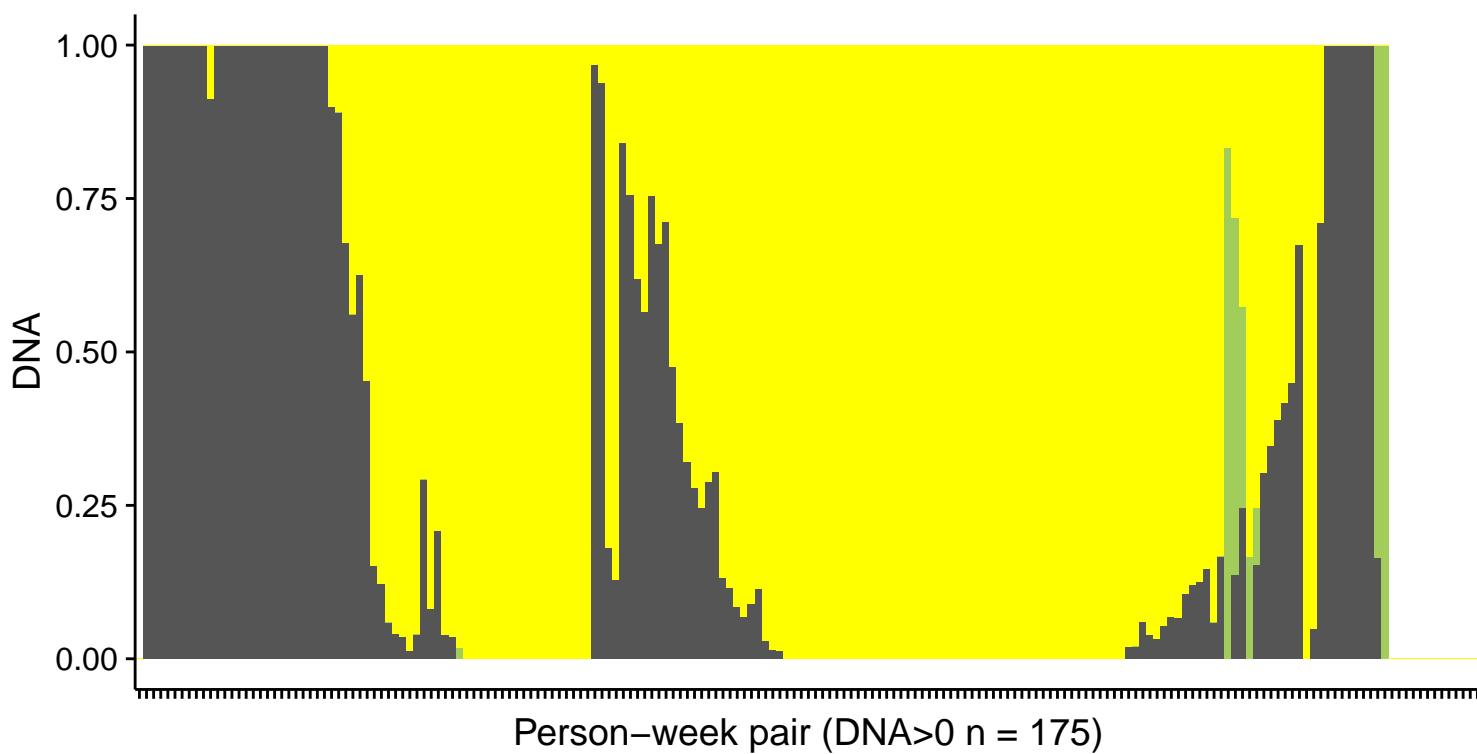

# PWY-7228: superpathway of guanosine nucleotides de novo biosynthesis I

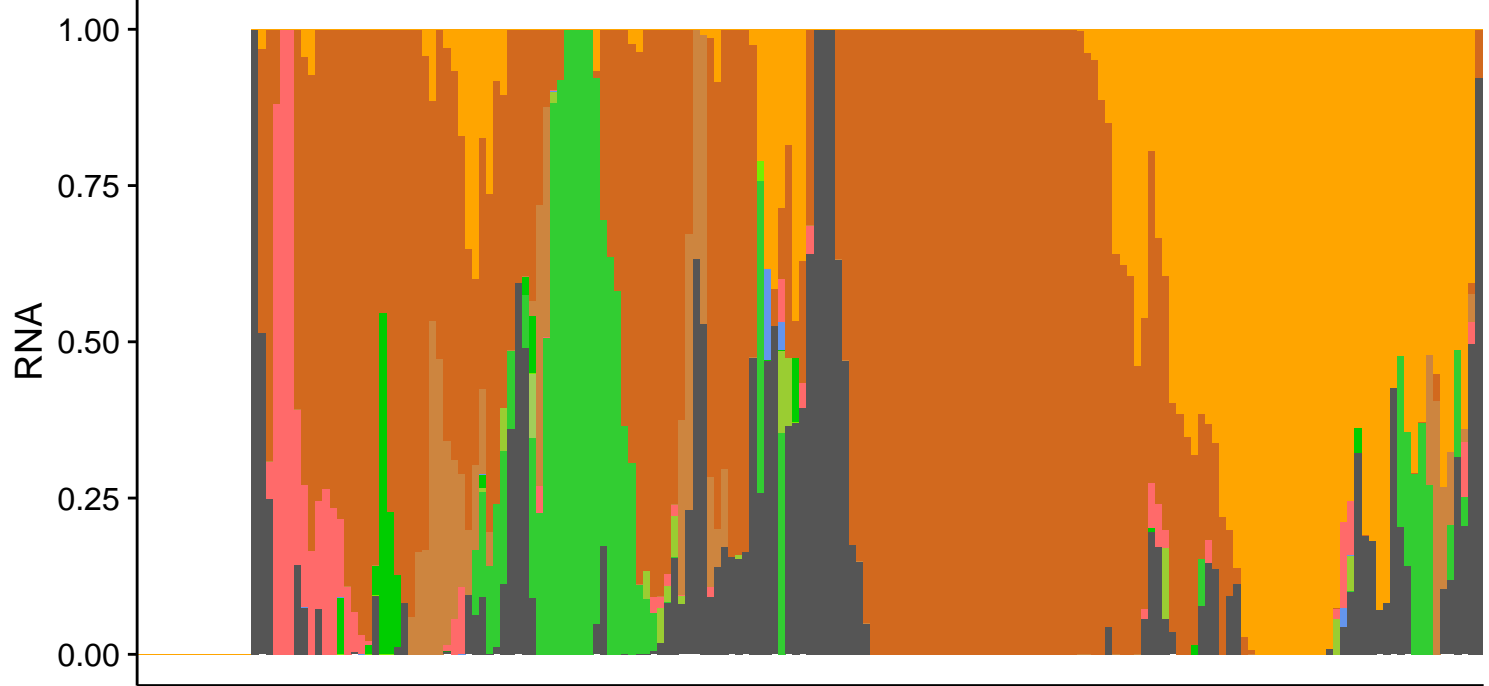

Person-week pair (RNA>0 n = 173)

- Bug
- Bacteroides dorei*
  - Bacteroides vulgatus*
  - Bacteroides massiliensis*
  - Parabacteroides distasonis*
  - Streptococcus salivarius*
  - Akkermansia muciniphila*
  - Escherichia coli*
  - Klebsiella pneumoniae*
  - Haemophilus parainfluenzae*
  - Bilophila wadsworthia*
  - Sutterella wadsworthensis*
  - other

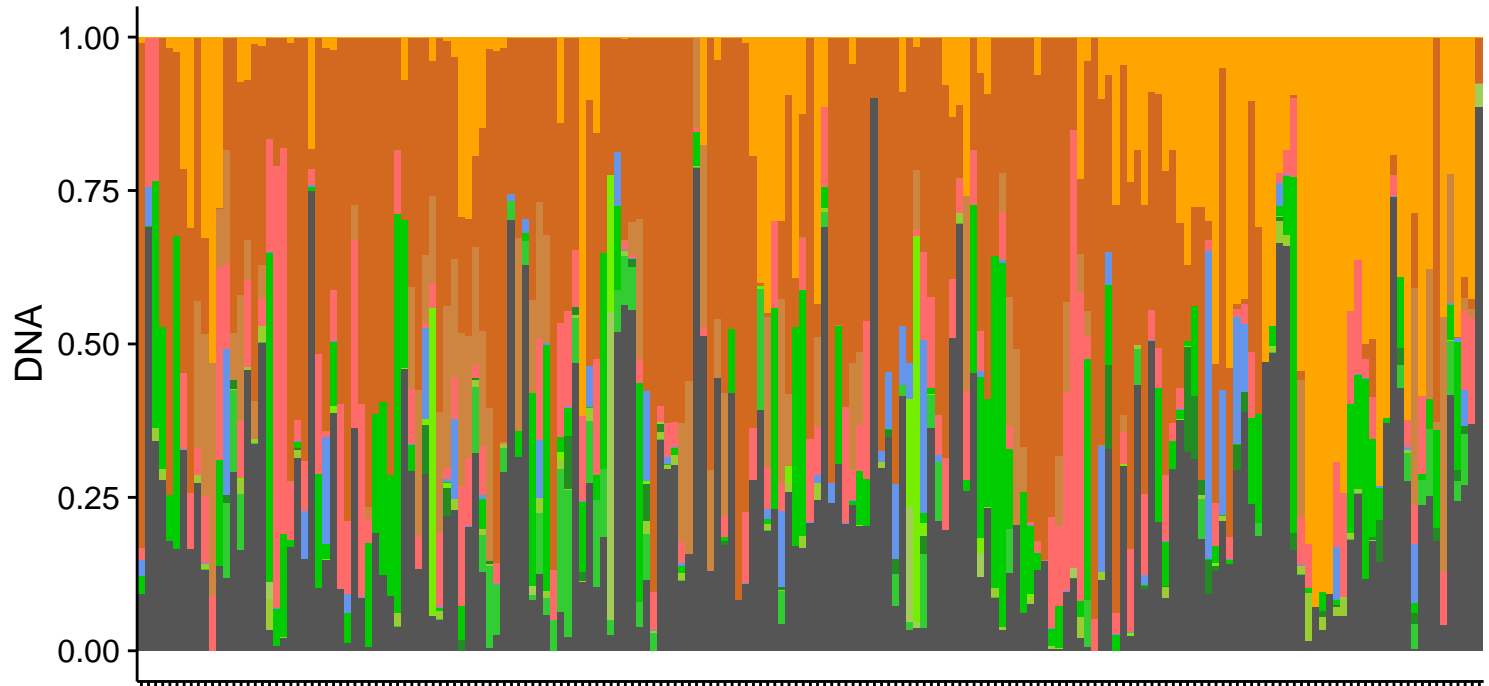

Person-week pair (DNA>0 n = 189)



# PWY-7219: adenosine ribonucleotides de novo biosynthesis

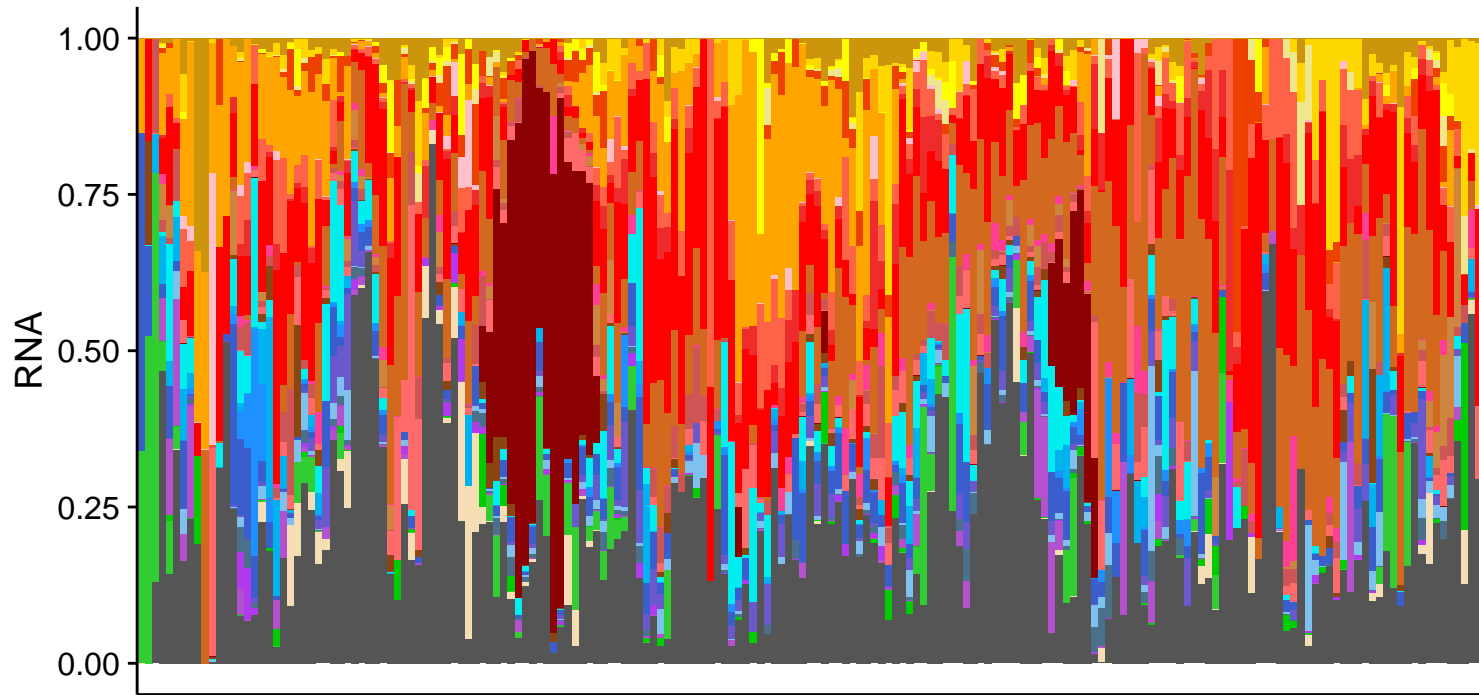

Person-week pair (RNA>0 n = 189)

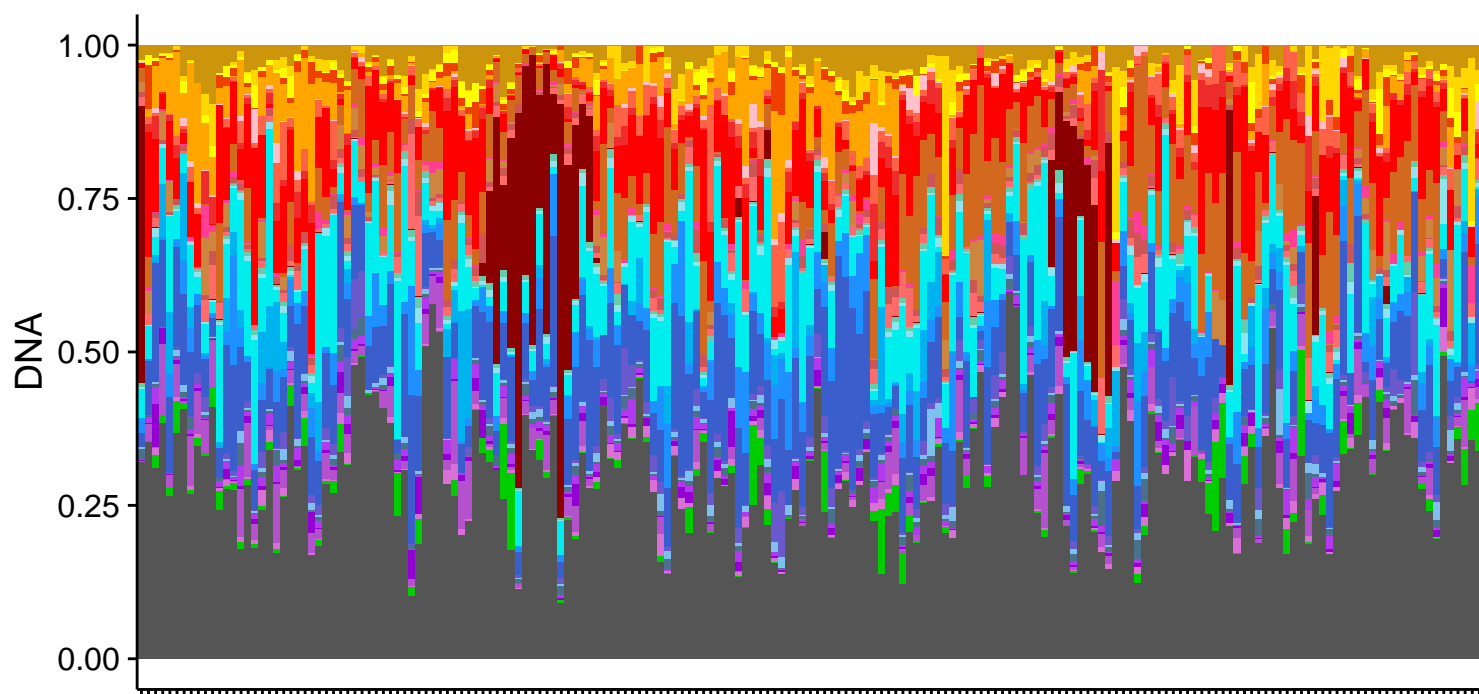

Person-week pair (DNA>0 n = 189)

## Bug

- Alistipes putredinis*
- Alistipes onderdonkii*
- Alistipes shahii*
- Bacteroides caccae*
- Bacteroides dorei*
- Bacteroides fragilis*
- Bacteroides ovatus*
- Bacteroides thetaiotaomicron*
- Bacteroides uniformis*
- Bacteroides vulgatus*
- Bacteroides massiliensis*
- Parabacteroides merdae*
- Parabacteroides distasonis*
- Prevotella copri*
- Coprococcus comes*
- Eubacterium hallii*
- Eubacterium rectale*
- Eubacterium siraeum*
- Eubacterium eligens*
- Faecalibacterium prausnitzii*
- Roseburia intestinalis*
- Roseburia hominis*
- Roseburia inulinivorans*
- Ruminococcus torques*
- Ruminococcus obeum*
- Ruminococcus bromii*
- Lachnospiraceae bacterium 5 1 63FAA*
- Akkermansia muciniphila*
- other*

# PWY-3841: folate transformations II

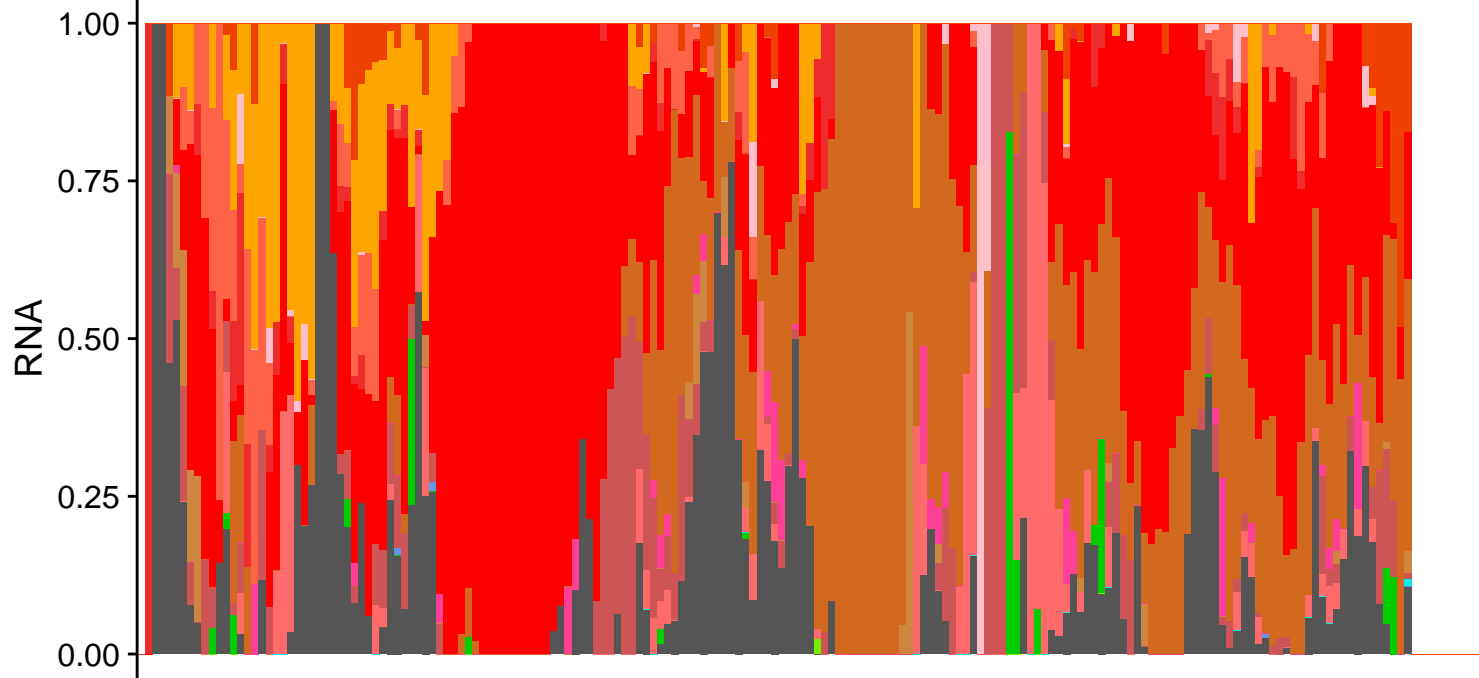

Person-week pair (RNA>0 n = 178)

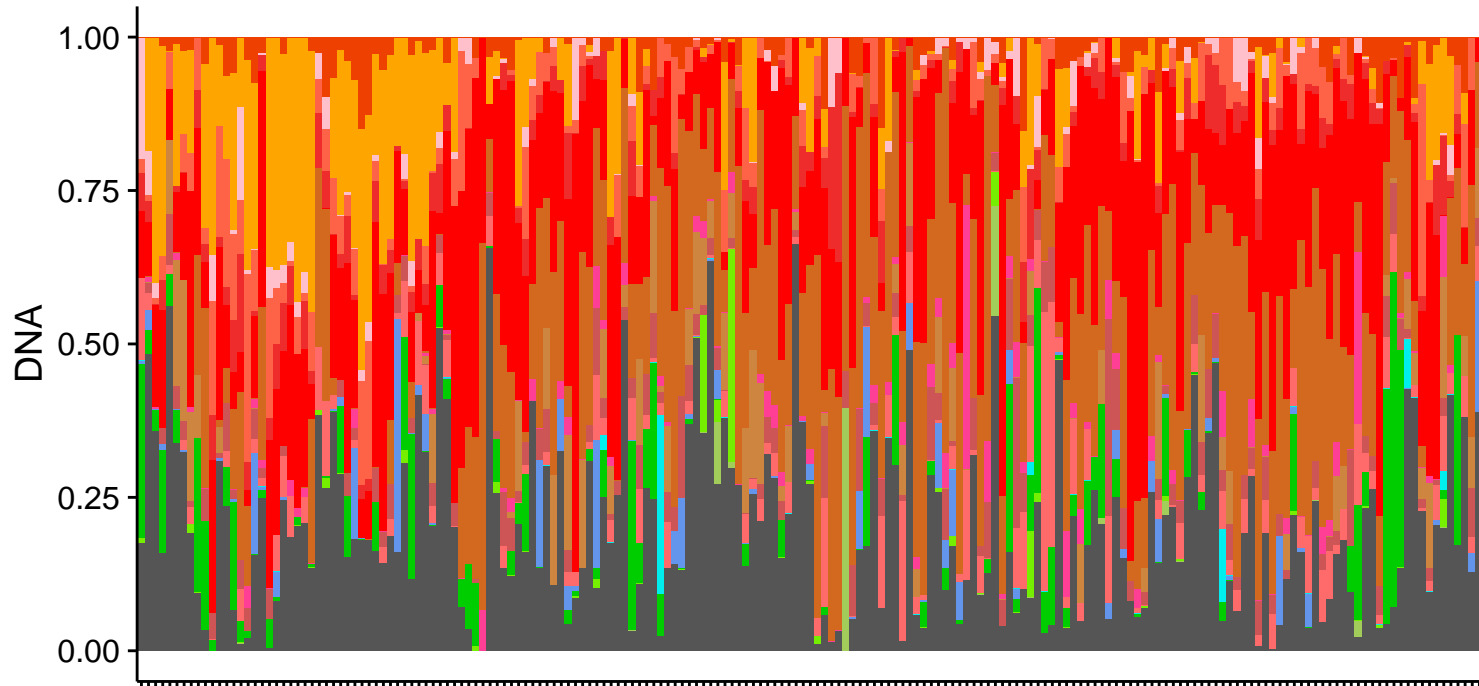

Person-week pair (DNA>0 n = 189)

- Bug**
- Bacteroides caccae*
  - Bacteroides dorei*
  - Bacteroides fragilis*
  - Bacteroides ovatus*
  - Bacteroides thetaiotaomicron*
  - Bacteroides uniformis*
  - Bacteroides vulgatus*
  - Bacteroides xylanisolvens*
  - Bacteroides massiliensis*
  - Parabacteroides merdae*
  - Parabacteroides distasonis*
  - Eubacterium rectale*
  - Streptococcus salivarius*
  - Akkermansia muciniphila*
  - Escherichia coli*
  - Klebsiella pneumoniae*
  - other

# PWY-2942: L-lysine biosynthesis III

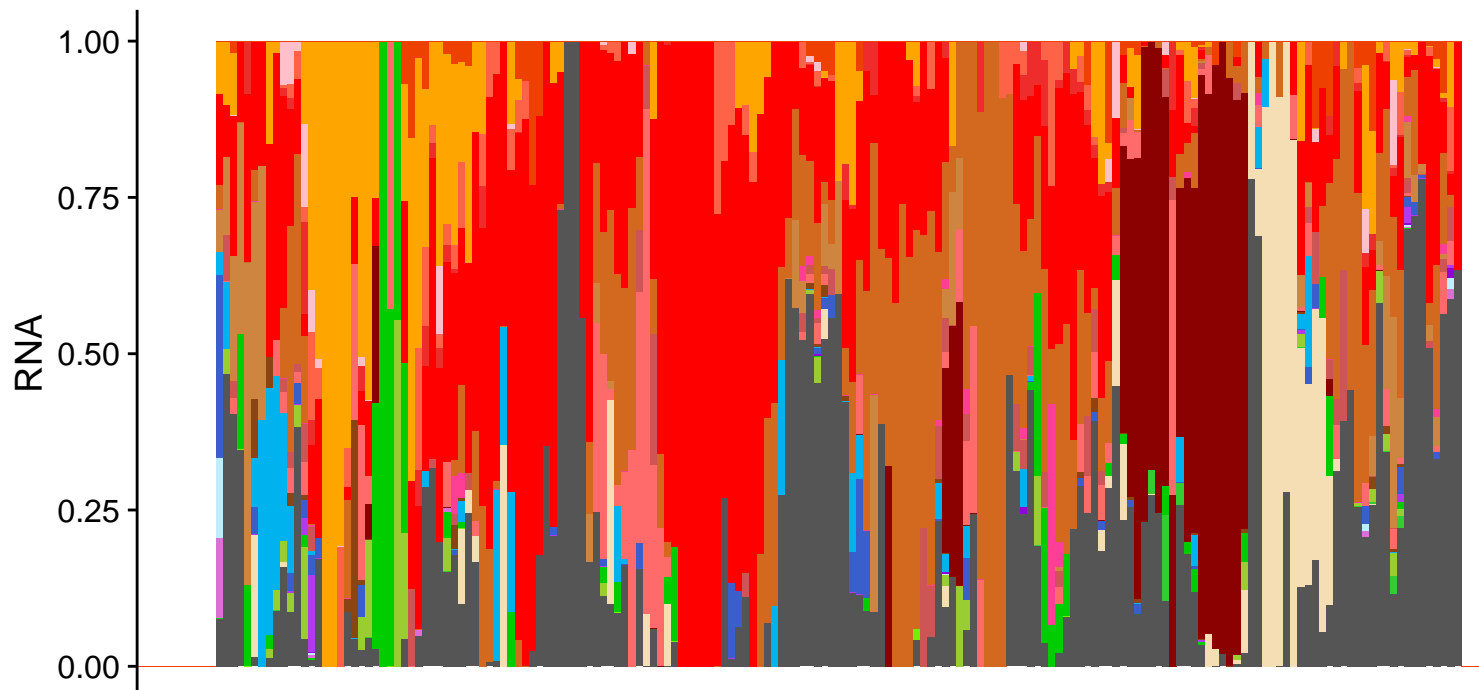

Person-week pair (RNA>0 n = 175)

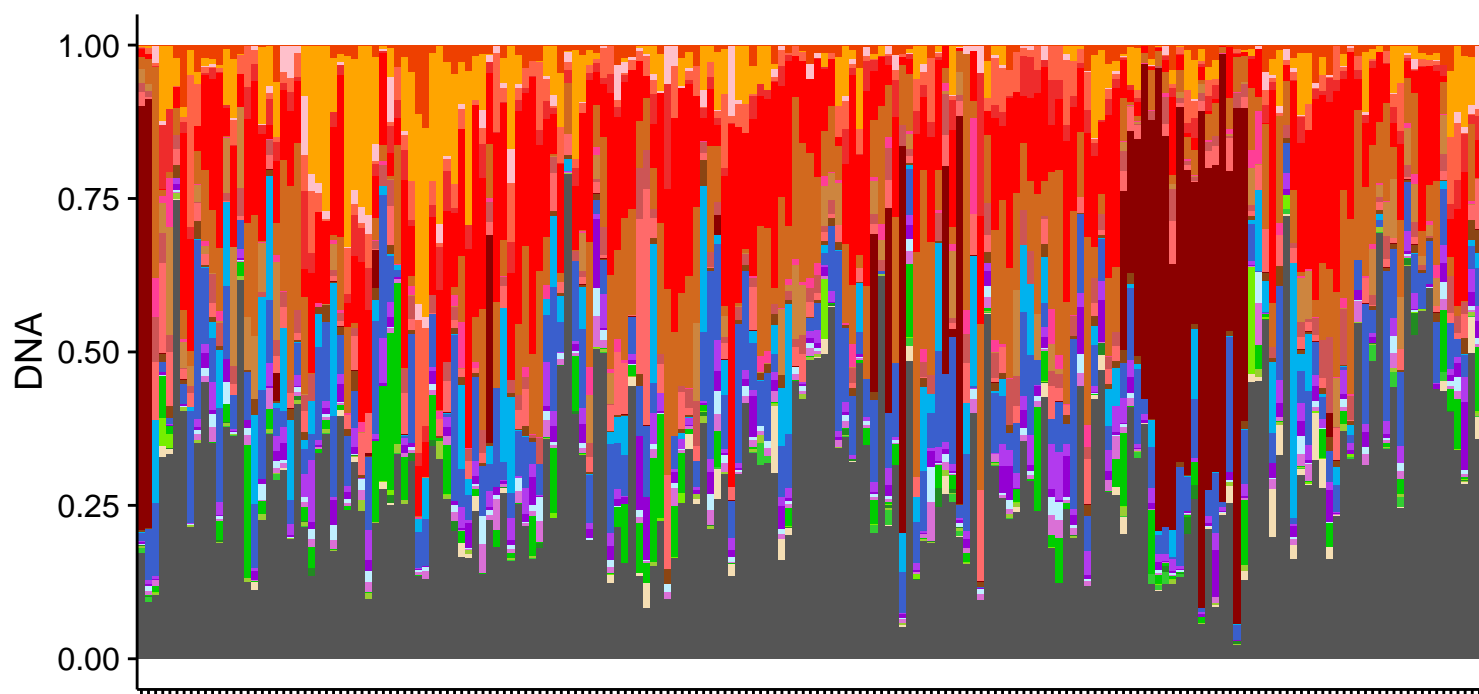

Person-week pair (DNA>0 n = 189)

## Bug

- *Bacteroides caccae*
- *Bacteroides dorei*
- *Bacteroides fragilis*
- *Bacteroides ovatus*
- *Bacteroides thetaiotaomicron*
- *Bacteroides uniformis*
- *Bacteroides vulgatus*
- *Bacteroides xylanisolvens*
- *Bacteroides massiliensis*
- *Parabacteroides merdae*
- *Parabacteroides distasonis*
- *Prevotella copri*
- *Odoribacter splanchnicus*
- *Eubacterium siraeum*
- *Faecalibacterium prausnitzii*
- *Ruminococcus torques*
- *Ruminococcus obeum*
- *Anaerostipes hadrus*
- *Lachnospiraceae bacterium 5 1 63FAA*
- *Akkermansia muciniphila*
- *Escherichia coli*
- *Haemophilus parainfluenzae*
- *Bilophila wadsworthia*
- *Sutterella wadsworthensis*
- *Methanobrevibacter smithii*
- other

# ARGININE-SYN4-PWY: L-ornithine de novo biosynthesis

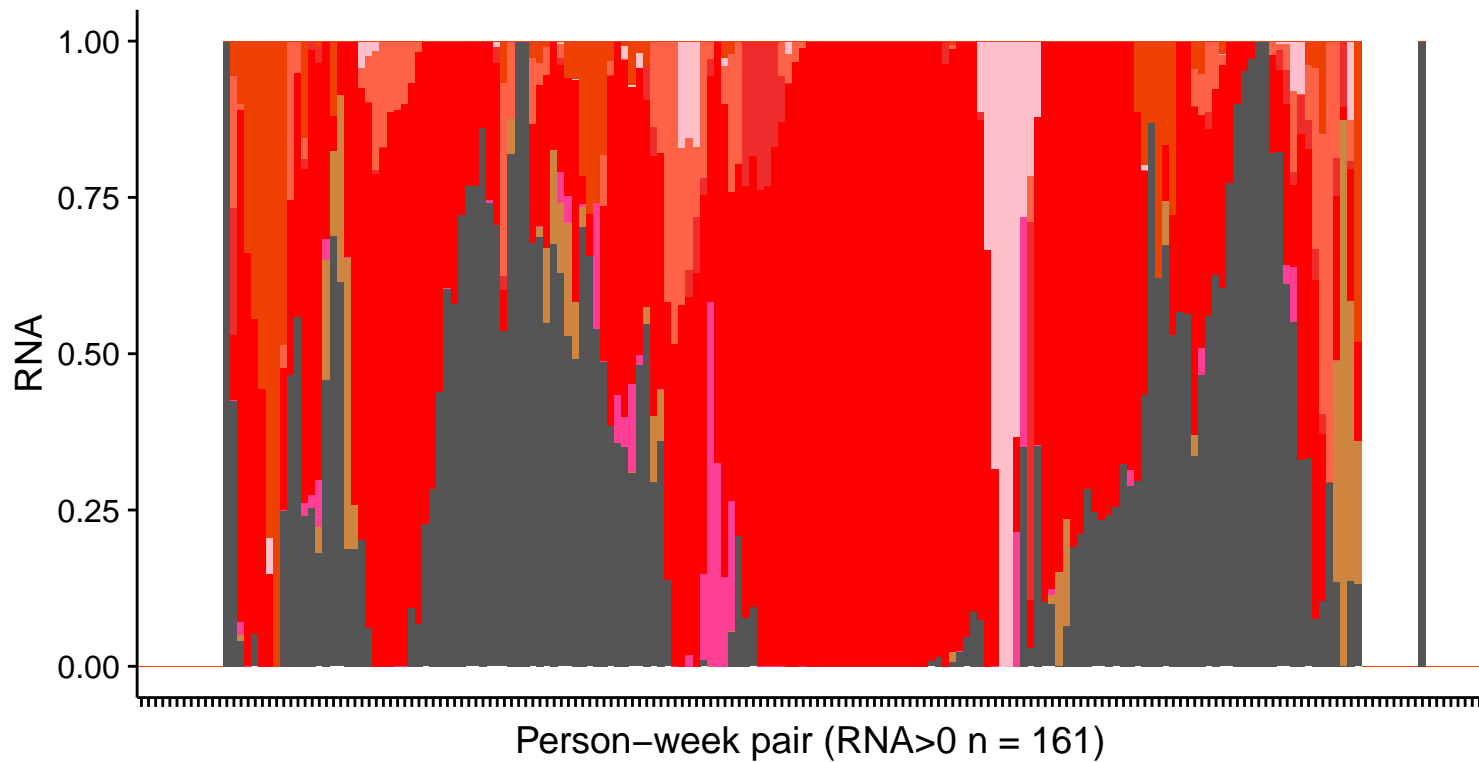

## Bug

- Bacteroides caccae*
- Bacteroides fragilis*
- Bacteroides ovatus*
- Bacteroides thetaiotaomicron*
- Bacteroides uniformis*
- Bacteroides xylanisolvens*
- Bacteroides massiliensis*
- other

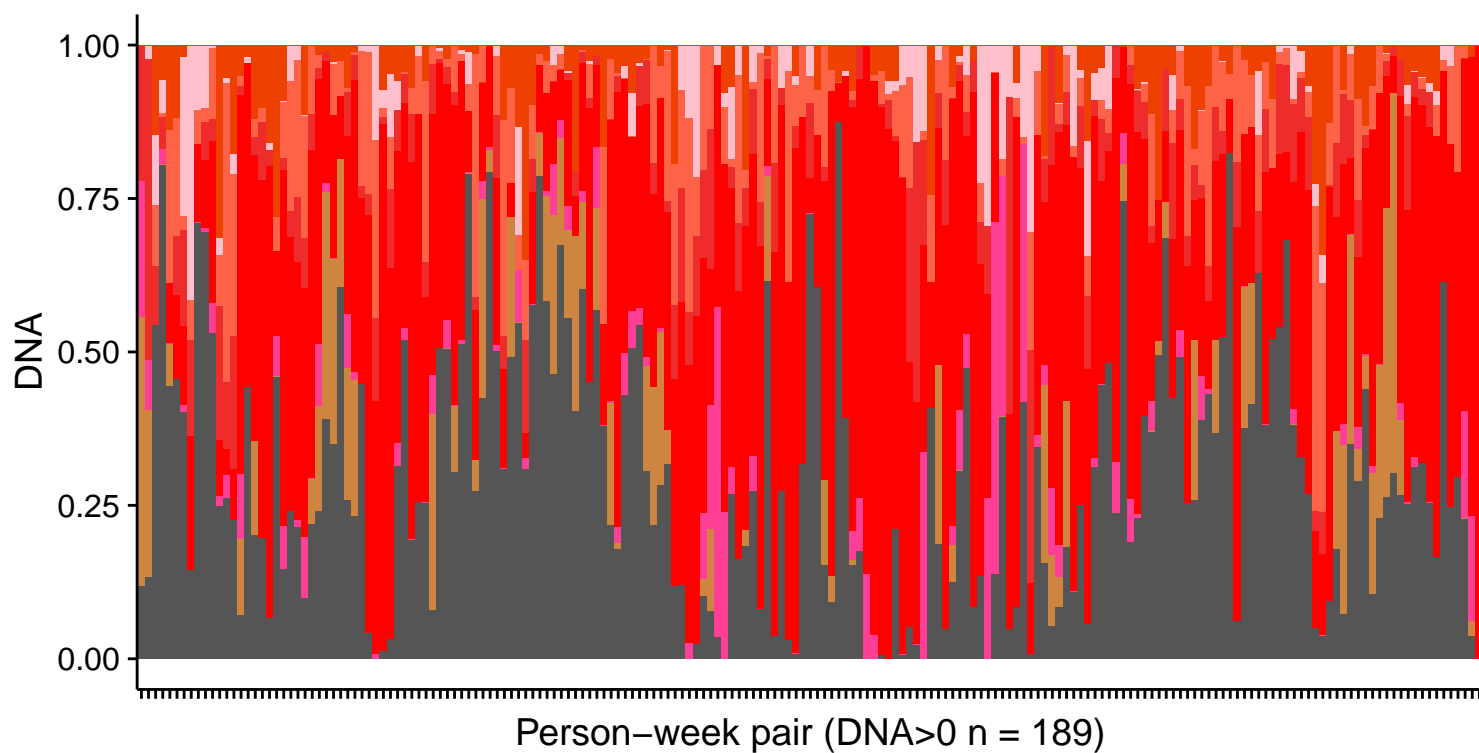

# PWY-7221: guanosine ribonucleotides de novo biosynthesis

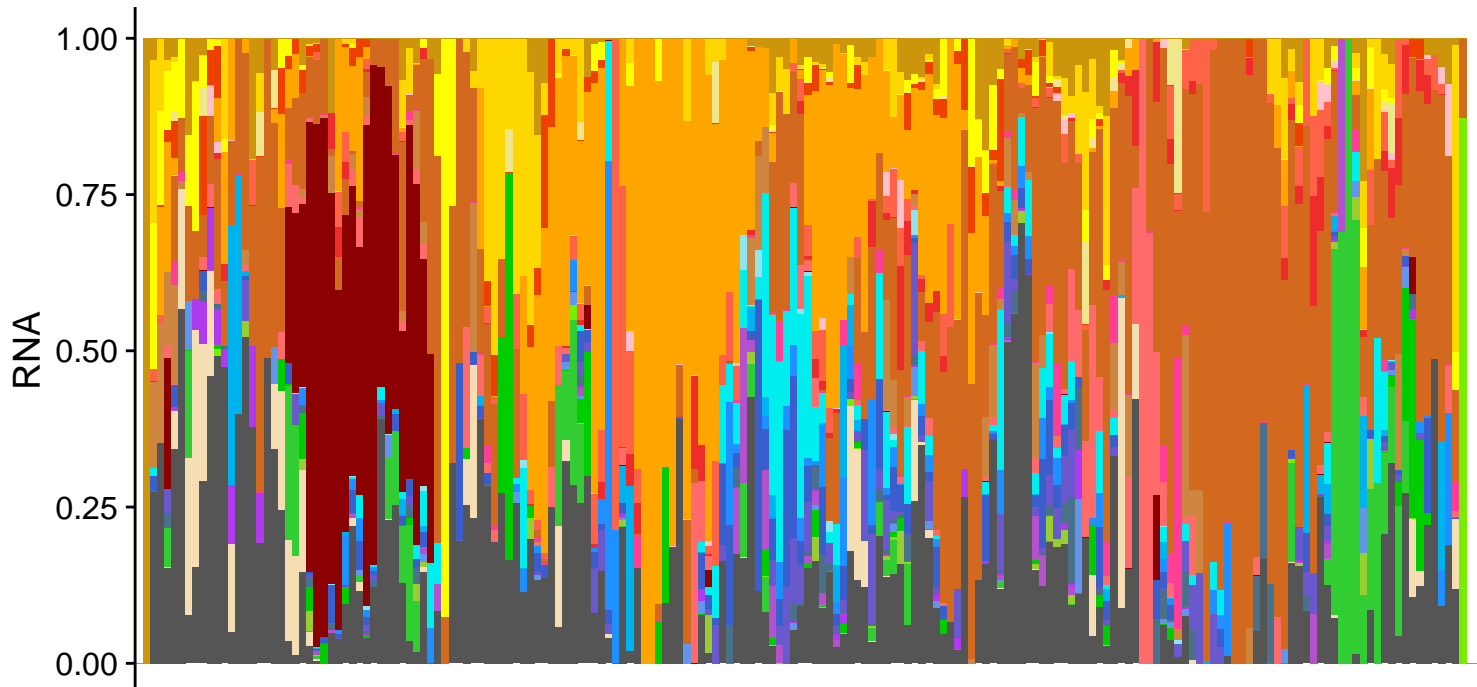

Person-week pair (RNA>0 n = 186)

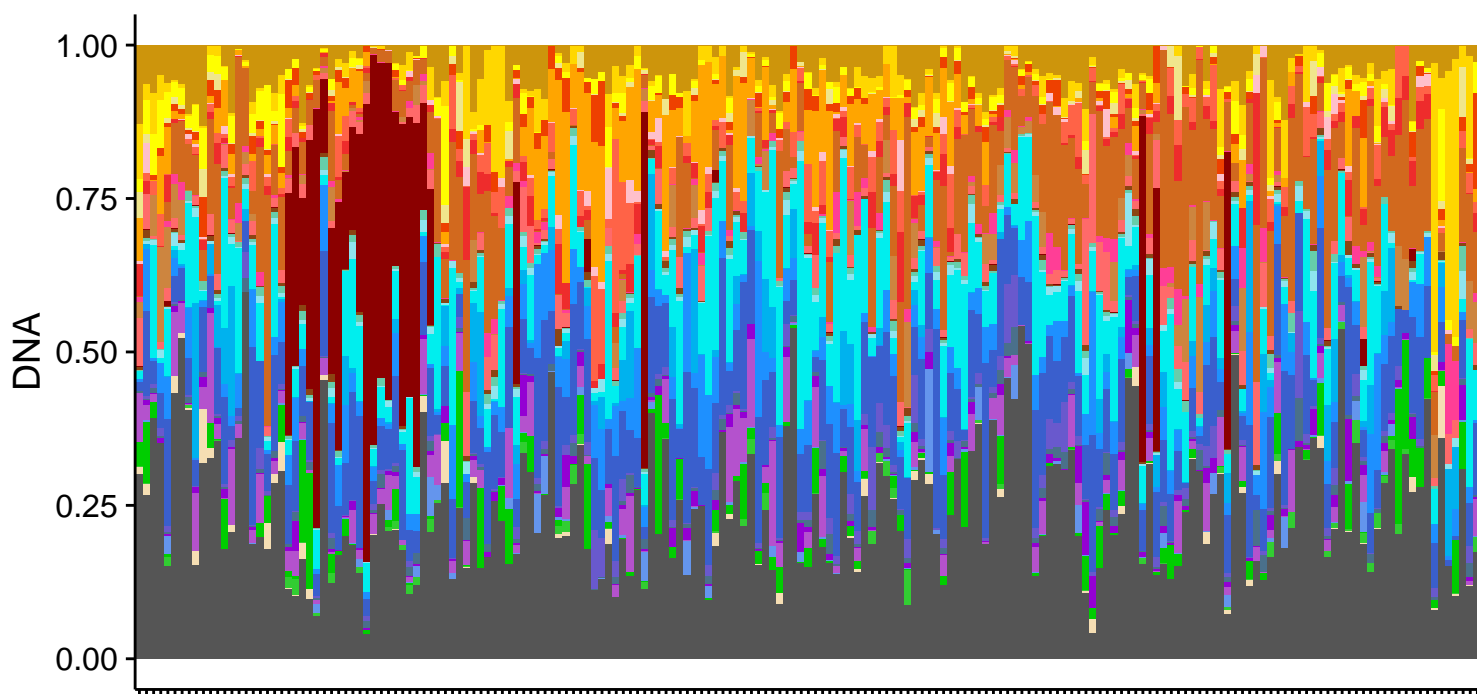

Person-week pair (DNA>0 n = 189)

## Bug

- Alistipes putredinis*
- Alistipes onderdonkii*
- Alistipes shahii*
- Alistipes finegoldii*
- Bacteroides caccae*
- Bacteroides dorei*
- Bacteroides fragilis*
- Bacteroides ovatus*
- Bacteroides thetaiotaomicron*
- Bacteroides vulgatus*
- Bacteroides xylanisolvens*
- Bacteroides massiliensis*
- Parabacteroides distasonis*
- Prevotella copri*
- Odoribacter splanchnicus*
- Coprococcus comes*
- Eubacterium hallii*
- Eubacterium rectale*
- Eubacterium siraeum*
- Eubacterium eligens*
- Faecalibacterium prausnitzii*
- Roseburia intestinalis*
- Roseburia inulinivorans*
- Ruminococcus obeum*
- Ruminococcus bromii*
- Streptococcus salivarius*
- Akkermansia muciniphila*
- Sutterella wadsworthensis*
- Methanobrevibacter smithii*
- other

# GLYCOGENSYNTH-PWY: glycogen biosynthesis I (from ADP-D-Glucose)

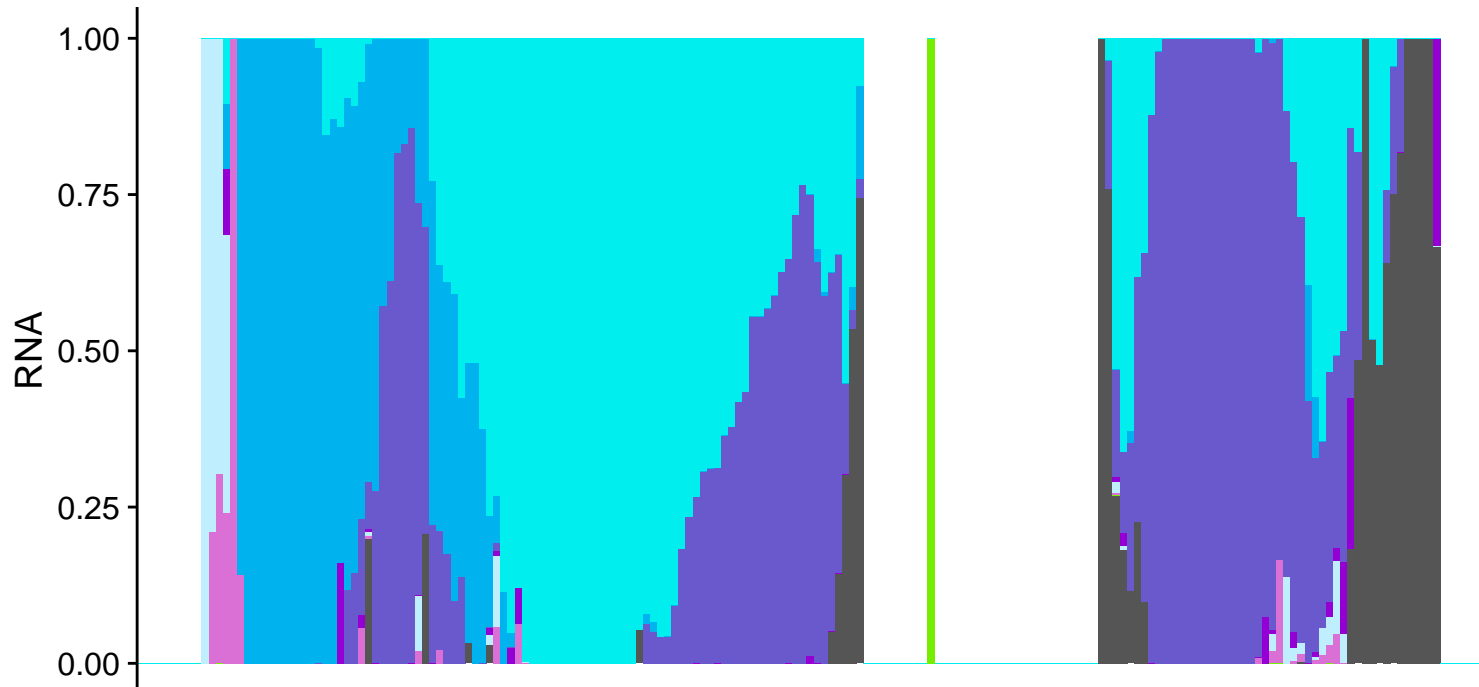

- Bug
- Eubacterium rectale*
  - Eubacterium siraeum*
  - Roseburia intestinalis*
  - Ruminococcus obeum*
  - Anaerostipes hadrus*
  - Lachnospiraceae bacterium 5\_1\_63FAA*
  - Escherichia coli*
  - Klebsiella pneumoniae*
  - other

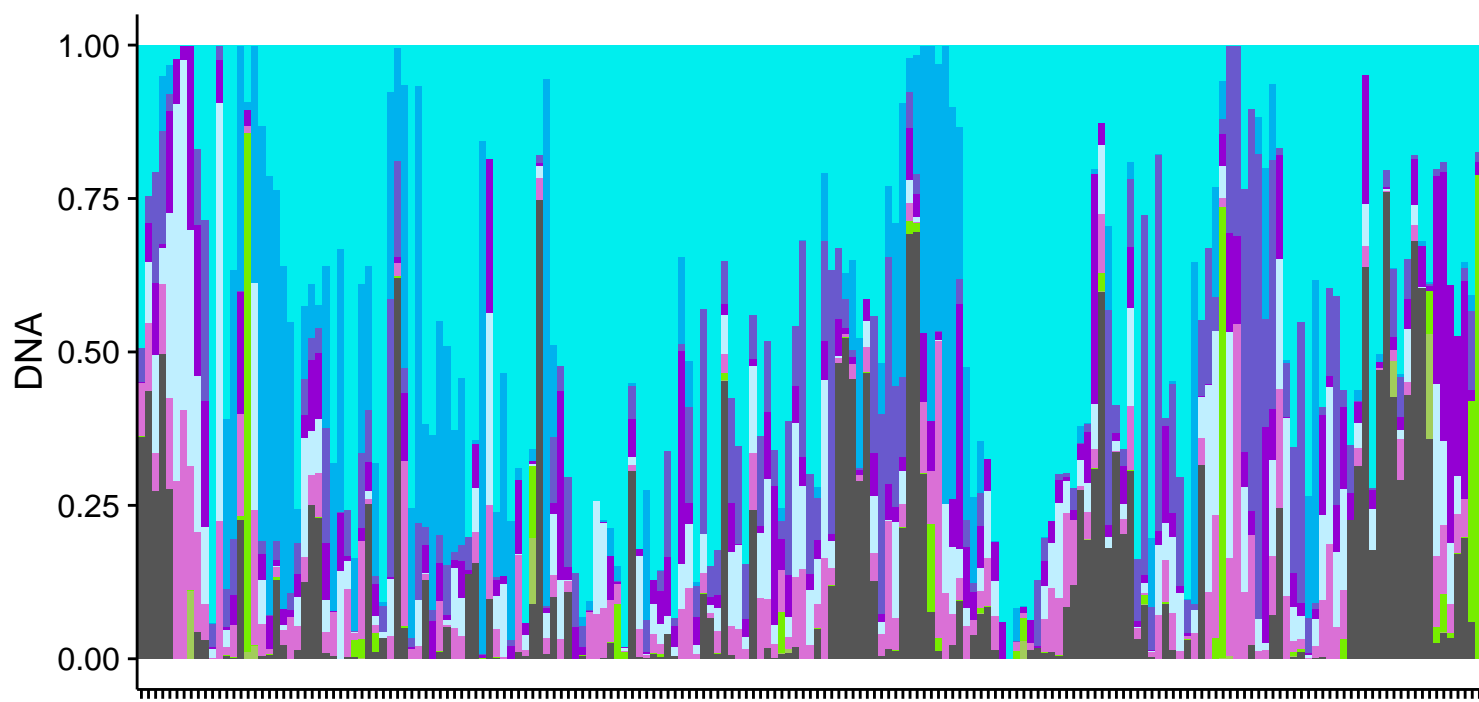

# PWY-5695: urate biosynthesis/inosine 5'-phosphate degradation

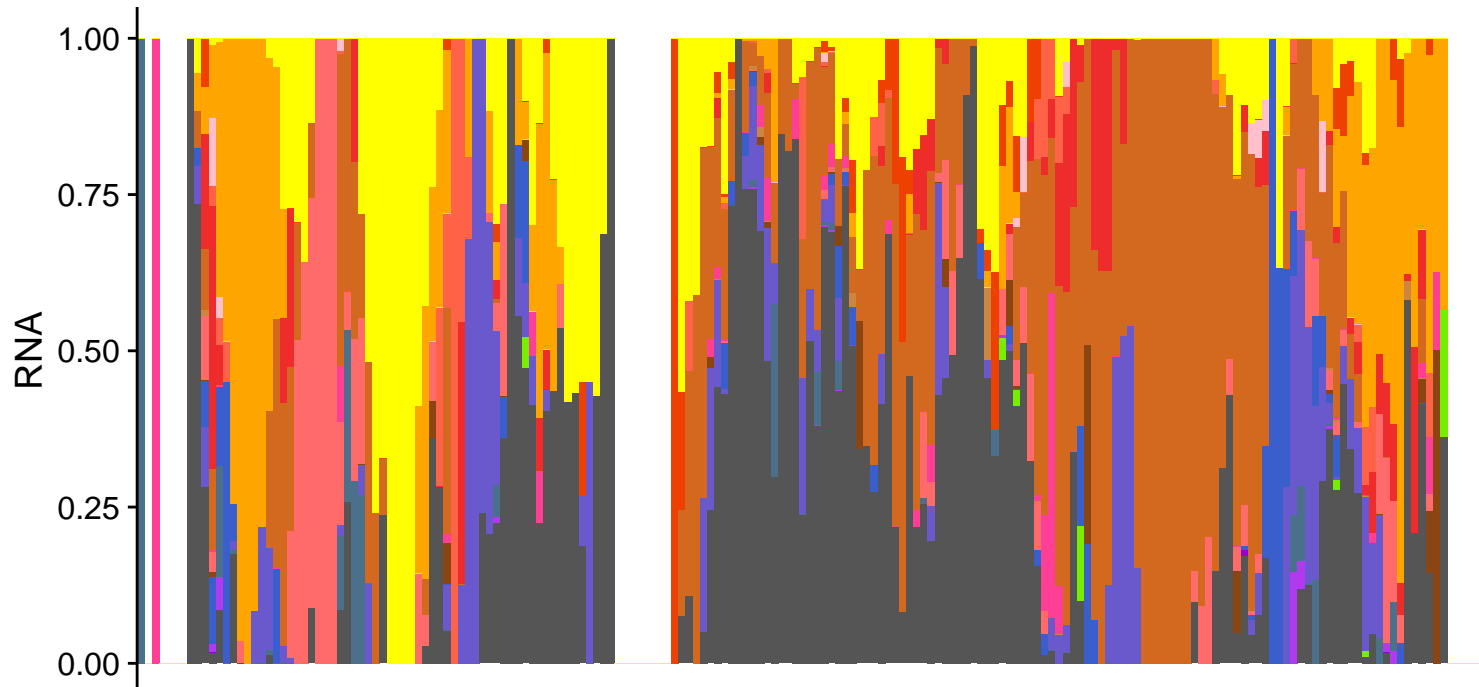

- Bug
- Alistipes shahii*
  - Bacteroides caccae*
  - Bacteroides dorei*
  - Bacteroides fragilis*
  - Bacteroides ovatus*
  - Bacteroides thetaiotaomicron*
  - Bacteroides vulgatus*
  - Bacteroides xylanisolvens*
  - Bacteroides massiliensis*
  - Parabacteroides distasonis*
  - Odoribacter splanchnicus*
  - Faecalibacterium prausnitzii*
  - Roseburia intestinalis*
  - Roseburia inulinivorans*
  - Ruminococcus torques*
  - Ruminococcus obeum*
  - Escherichia coli*
  - Klebsiella pneumoniae*
  - Haemophilus parainfluenzae*
  - other

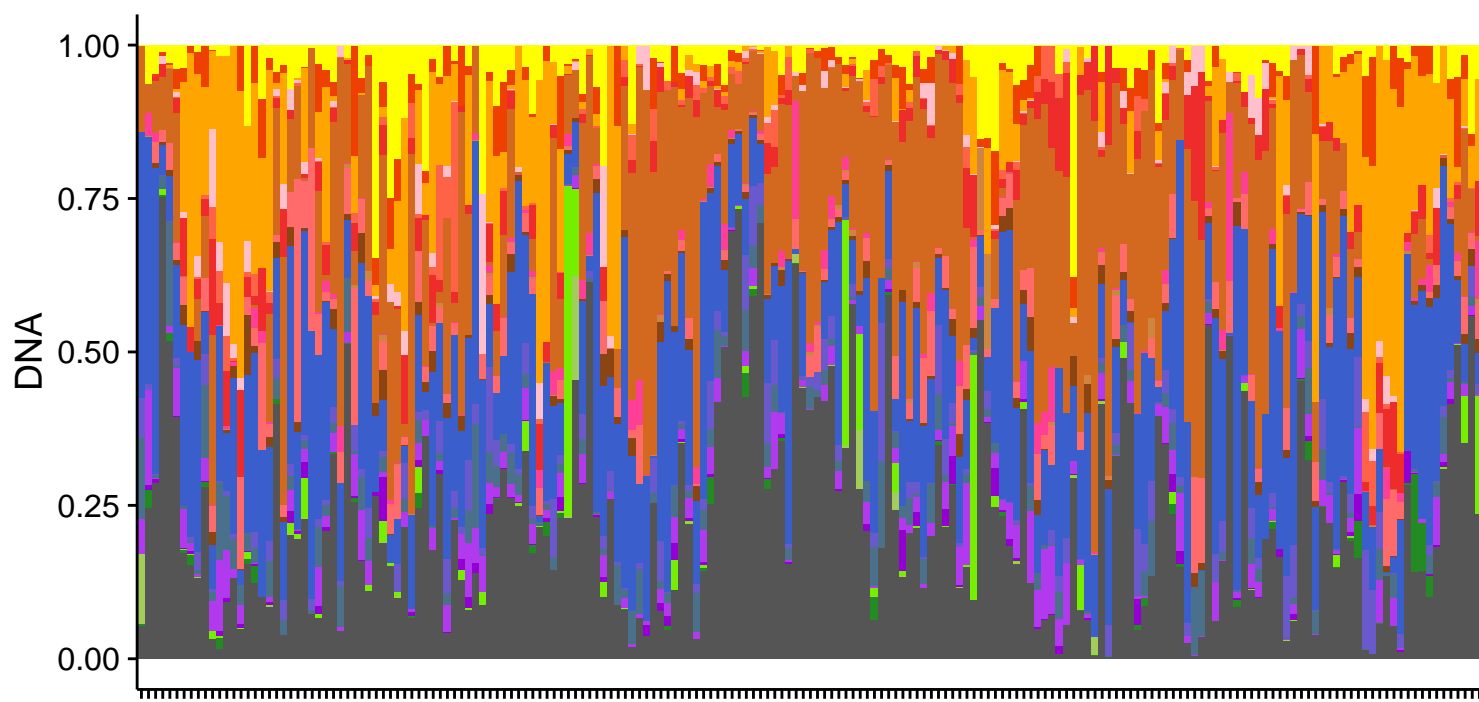

# PWY-6126: superpathway of adenosine nucleotides de novo biosynthesis II

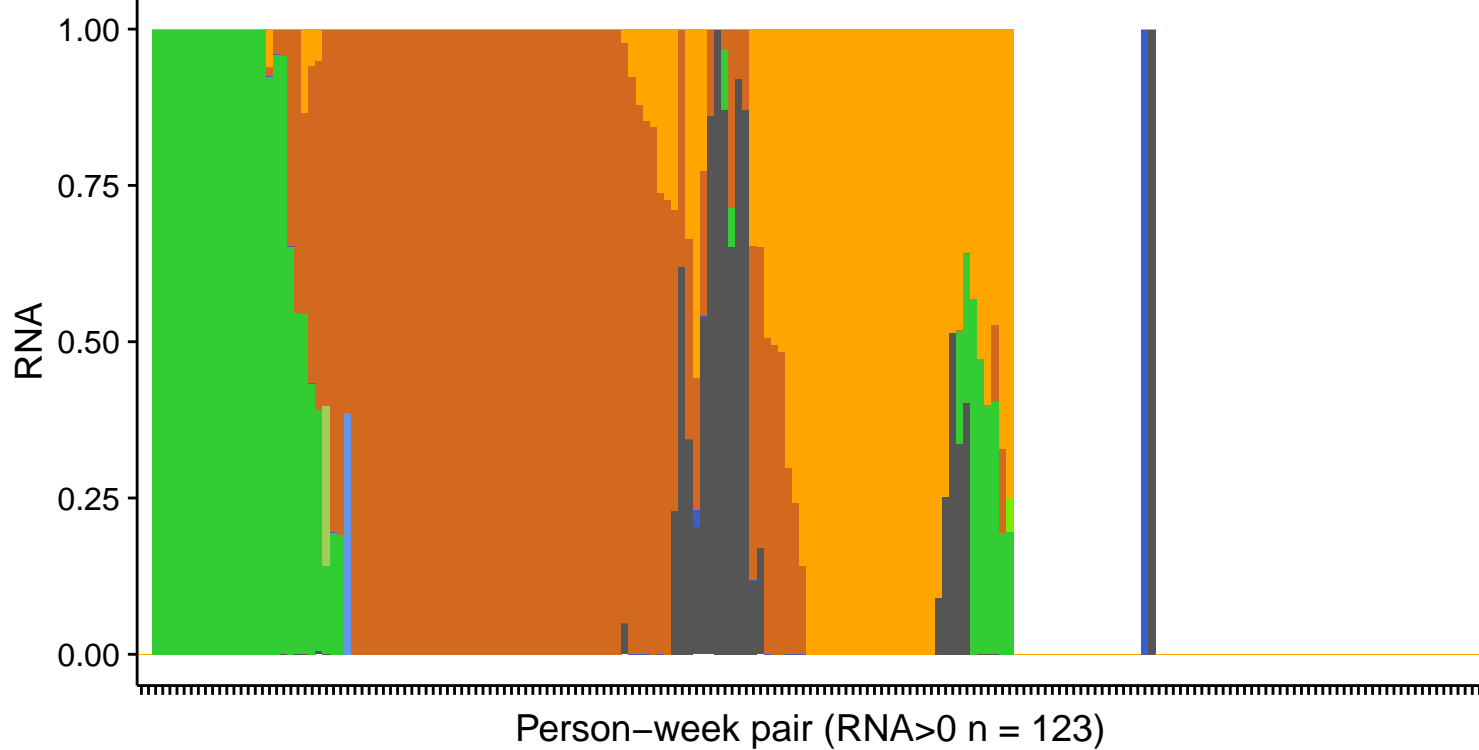

## Bug

- Bacteroides dorei*
- Bacteroides vulgatus*
- Faecalibacterium prausnitzii*
- Streptococcus salivarius*
- Escherichia coli*
- Klebsiella pneumoniae*
- Haemophilus parainfluenzae*
- Sutterella wadsworthensis*
- other*

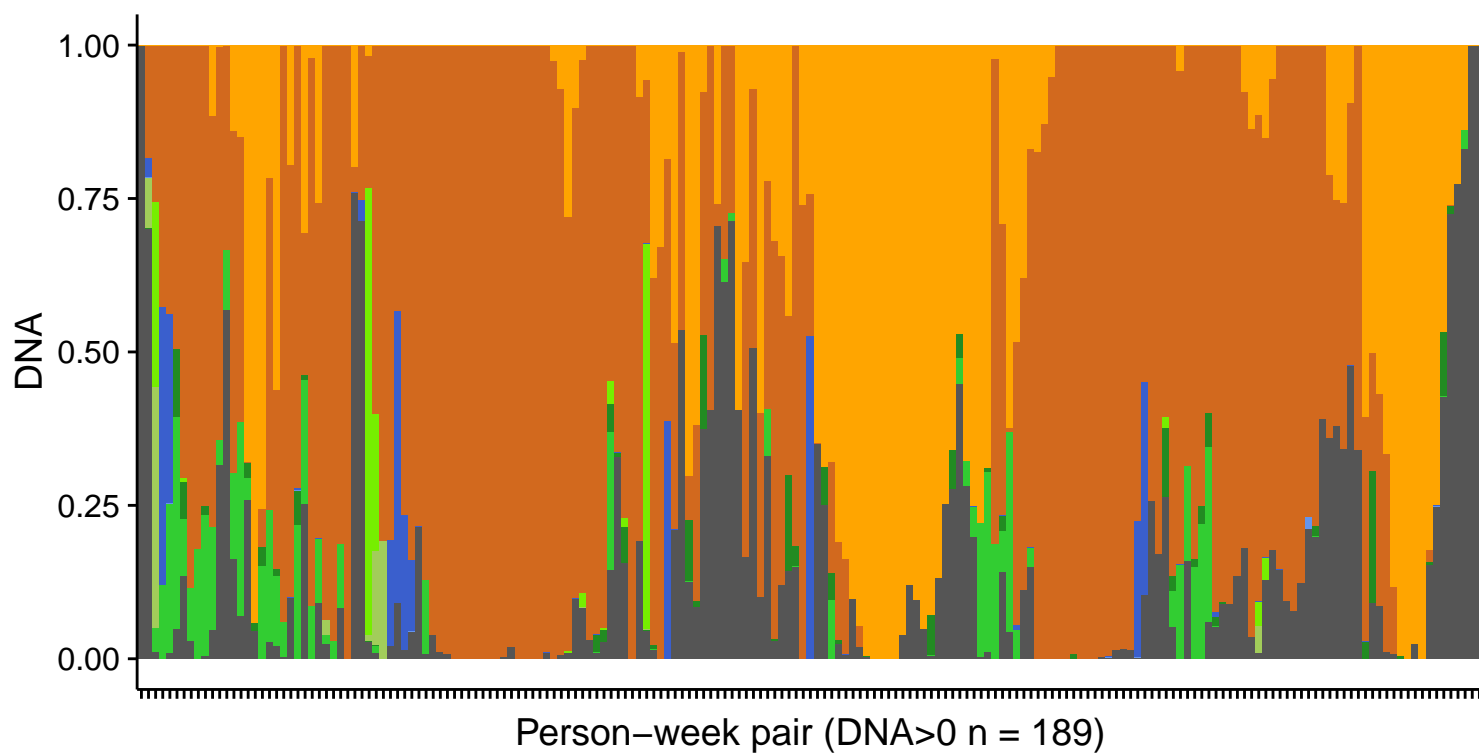



# PWY-7229: superpathway of adenosine nucleotides de novo biosynthesis I

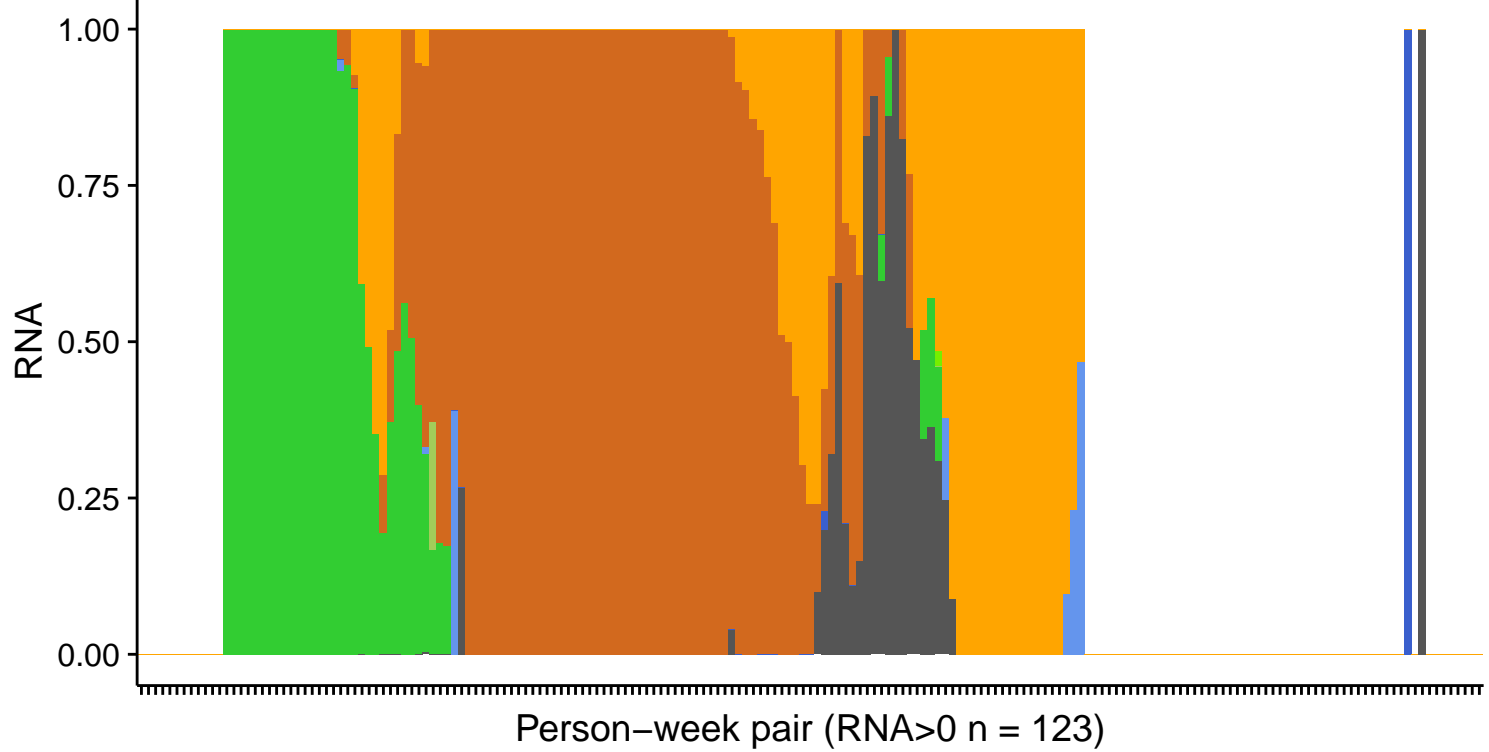

- Bug
- Bacteroides dorei*
  - Bacteroides vulgatus*
  - Faecalibacterium prausnitzii*
  - Streptococcus salivarius*
  - Escherichia coli*
  - Klebsiella pneumoniae*
  - Haemophilus parainfluenzae*
  - Sutterella wadsworthensis*
  - other*

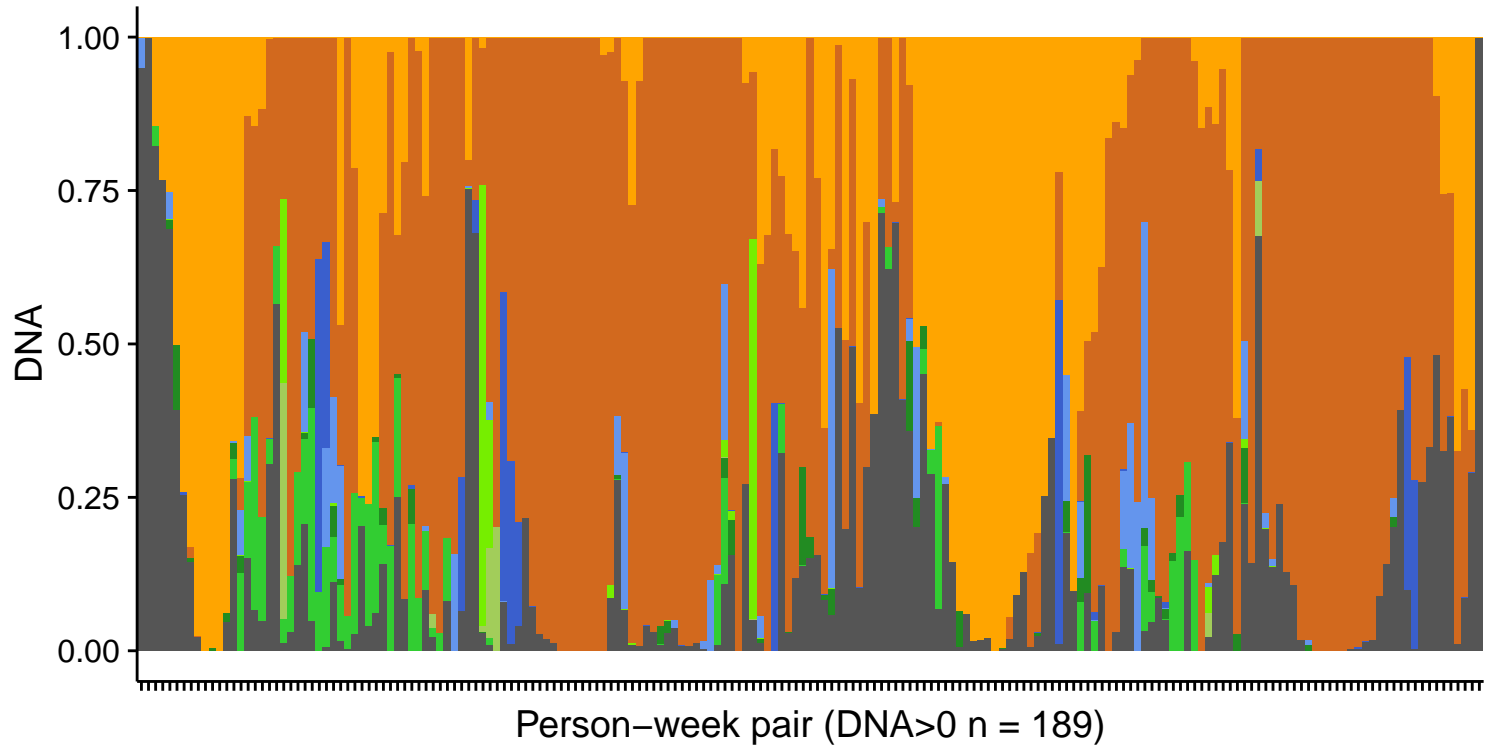

# PWY-7456: mannan degradation

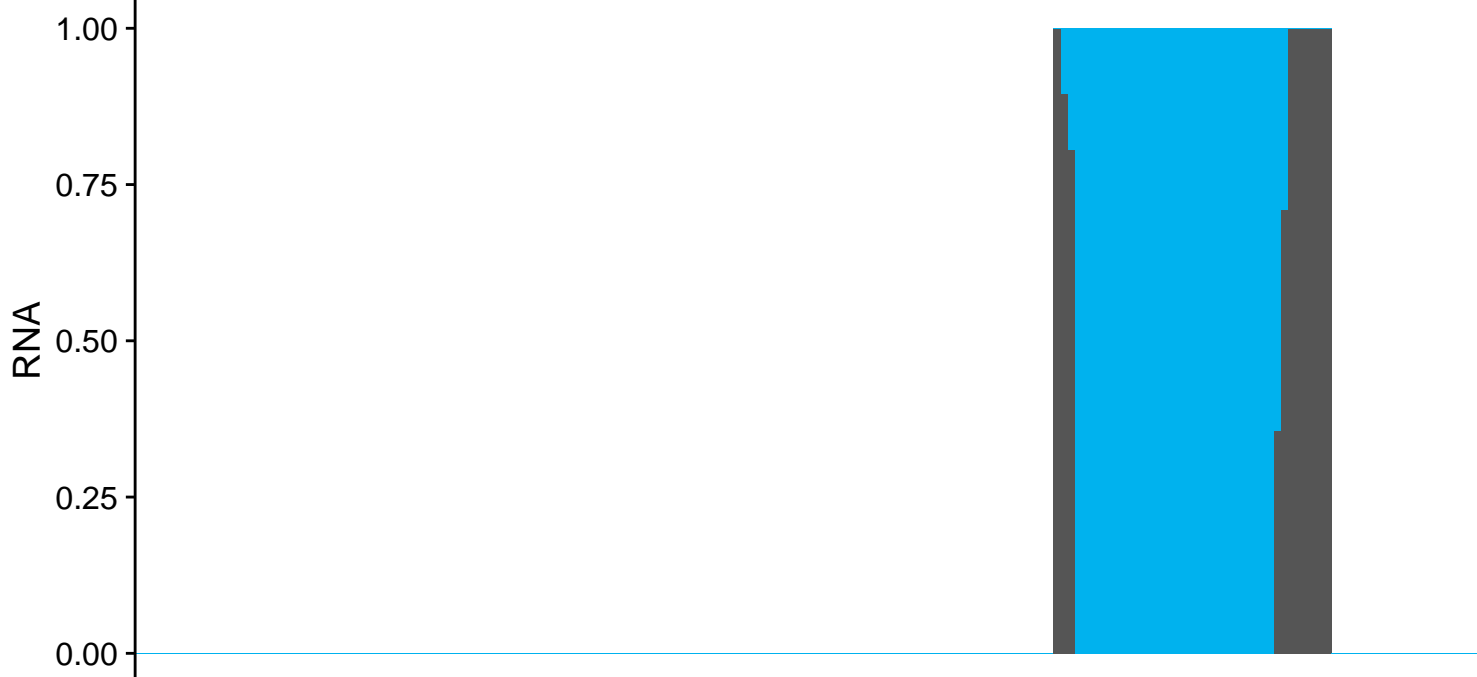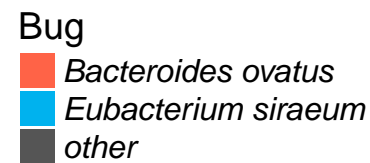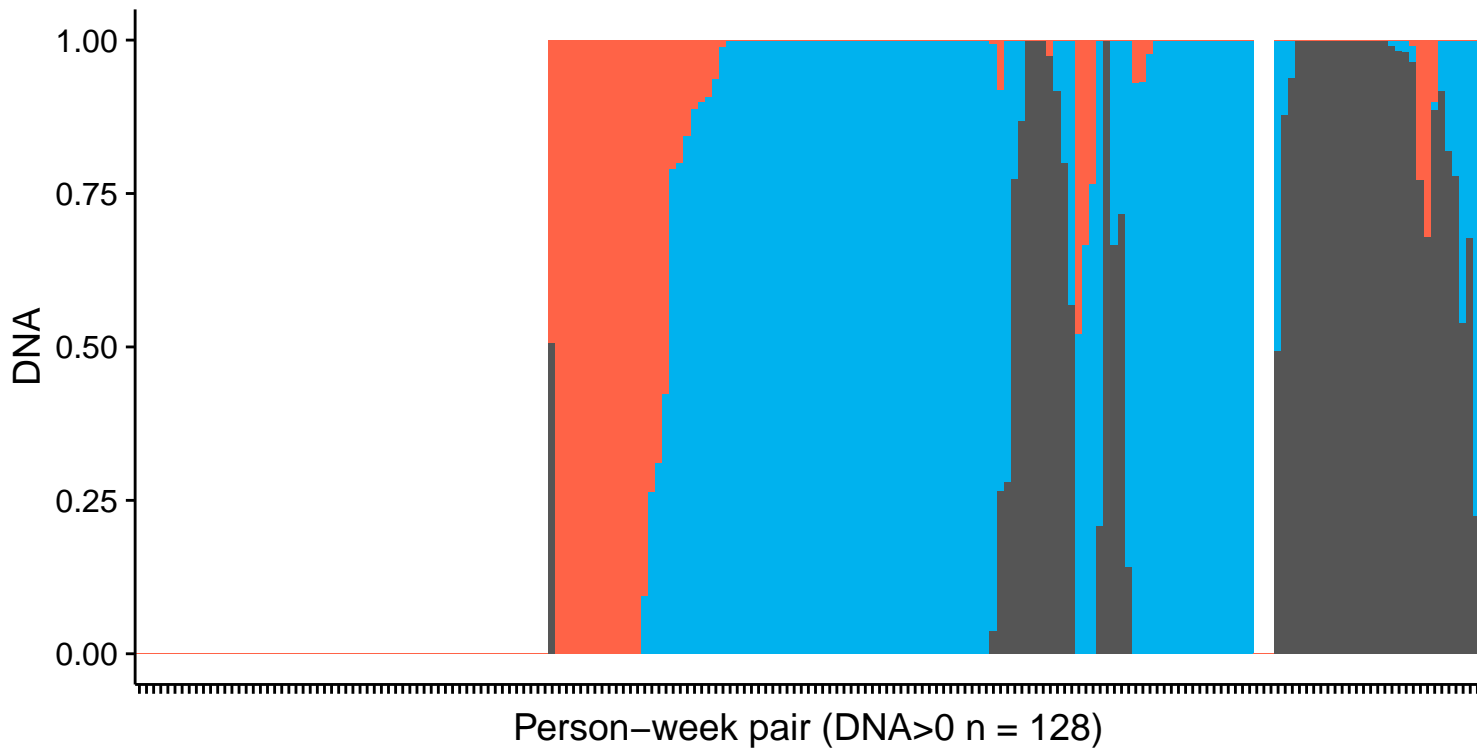

# PWY-7220: adenosine deoxyribonucleotides de novo biosynthesis II

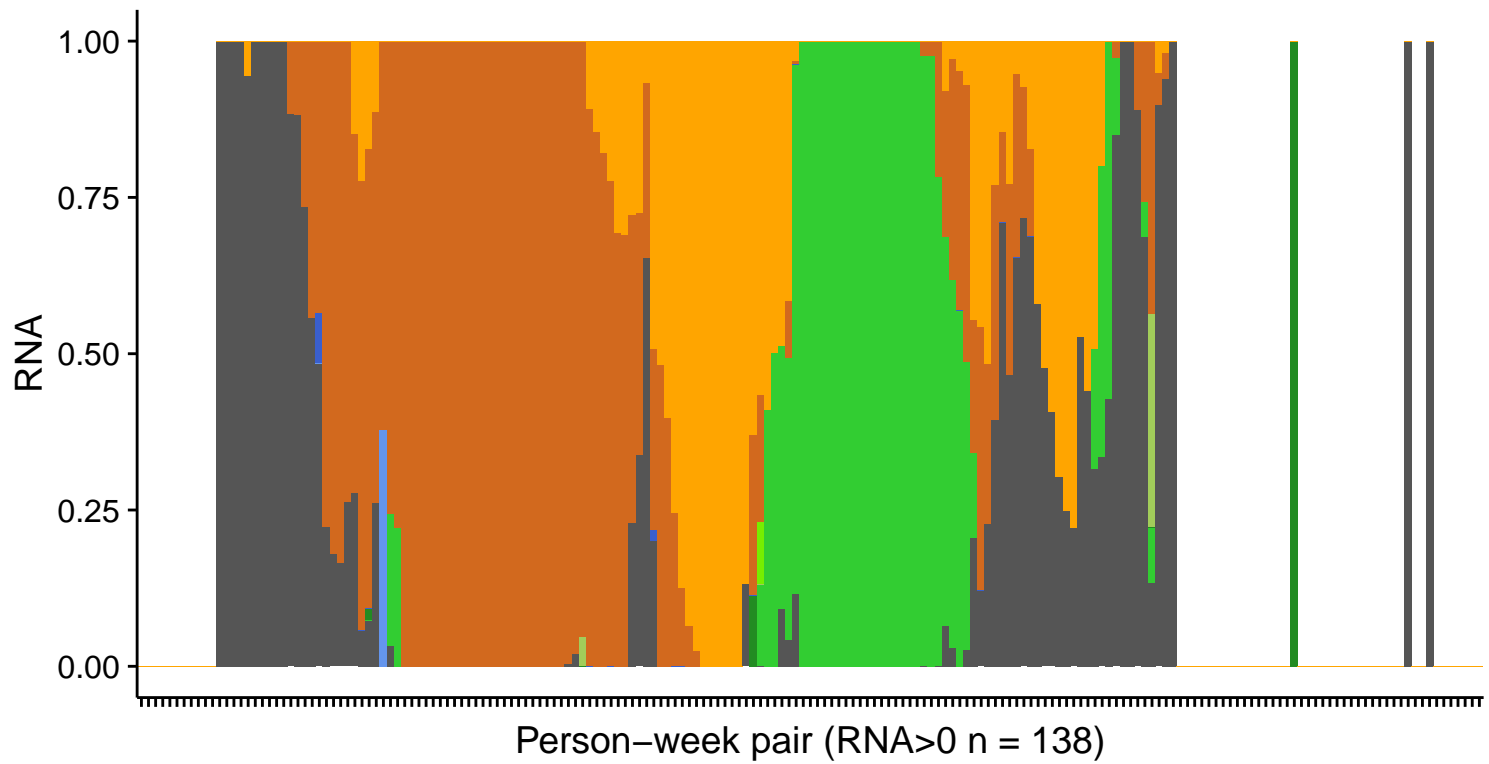

- Bug
- Bacteroides dorei*
  - Bacteroides vulgatus*
  - Faecalibacterium prausnitzii*
  - Streptococcus salivarius*
  - Escherichia coli*
  - Klebsiella pneumoniae*
  - Haemophilus parainfluenzae*
  - Sutterella wadsworthensis*
  - other*

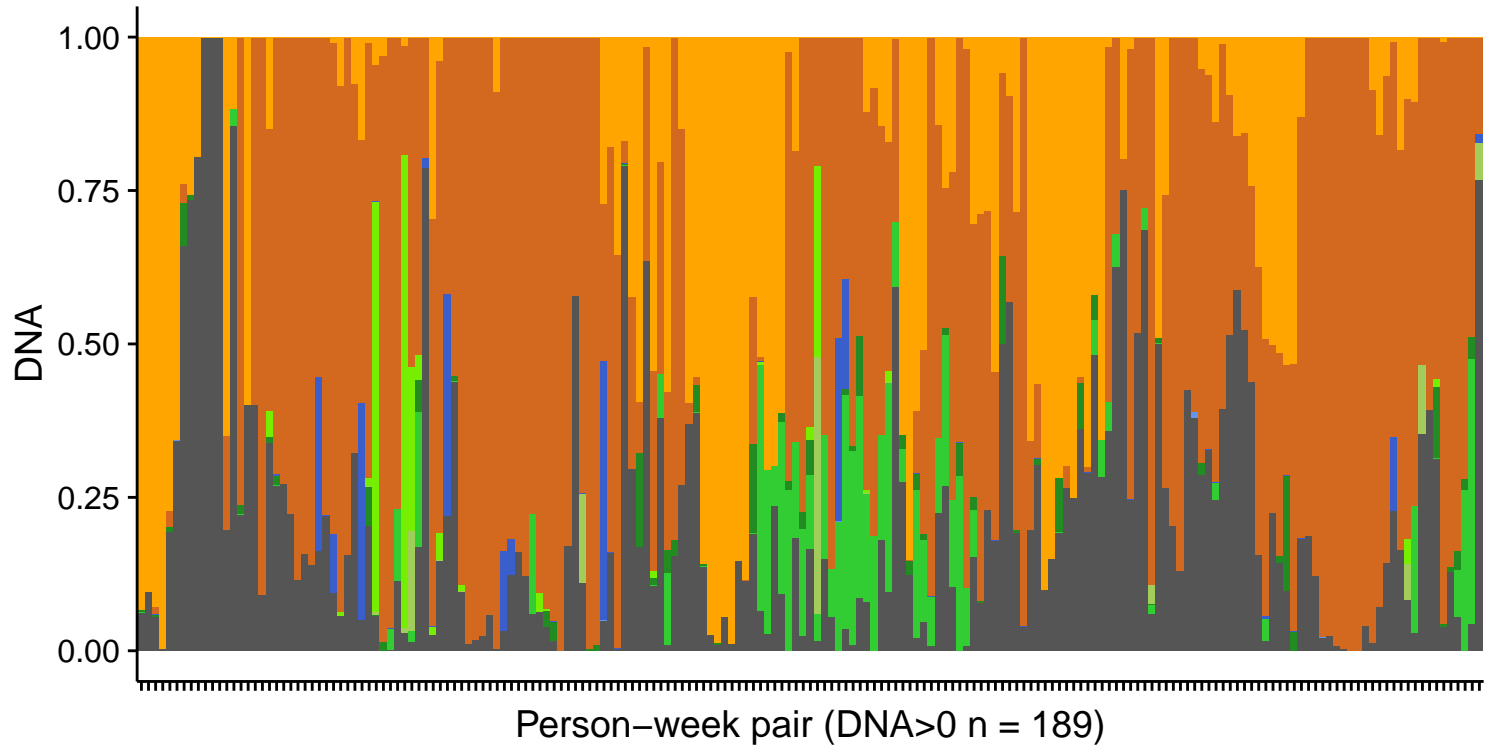

# PWY-7222: guanosine deoxyribonucleotides de novo biosynthesis II

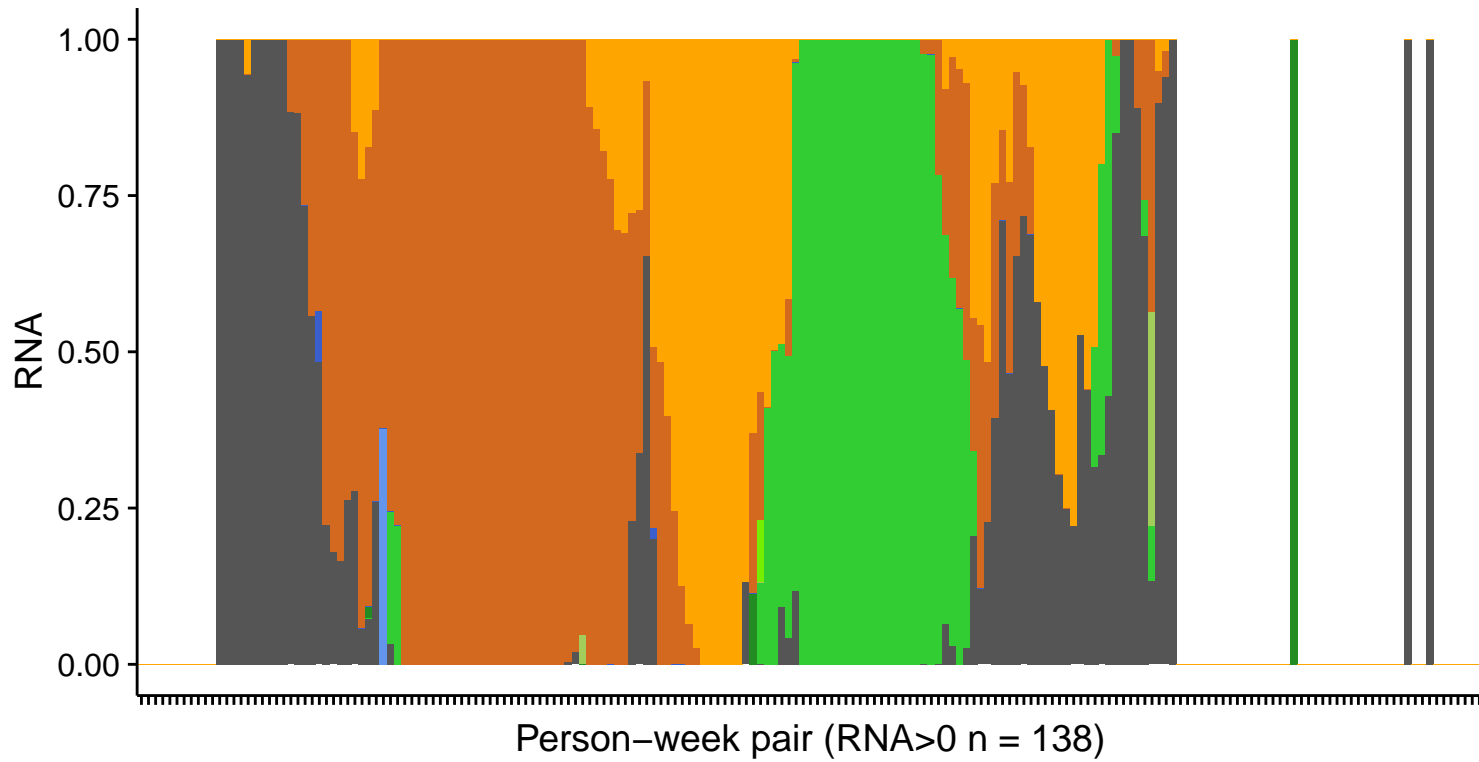

## Bug

- Bacteroides dorei*
- Bacteroides vulgatus*
- Faecalibacterium prausnitzii*
- Streptococcus salivarius*
- Escherichia coli*
- Klebsiella pneumoniae*
- Haemophilus parainfluenzae*
- Sutterella wadsworthensis*
- other

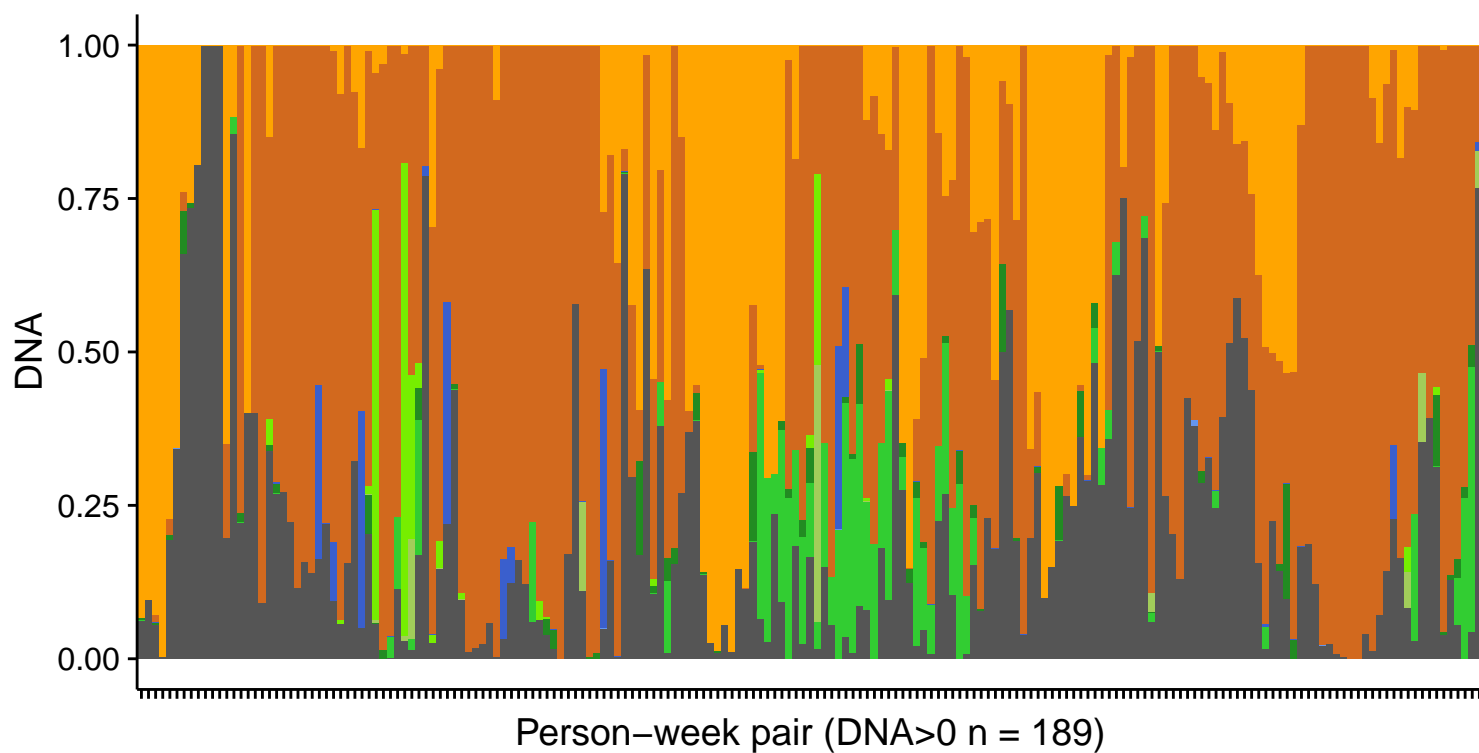

# PWY-6527: stachyose degradation

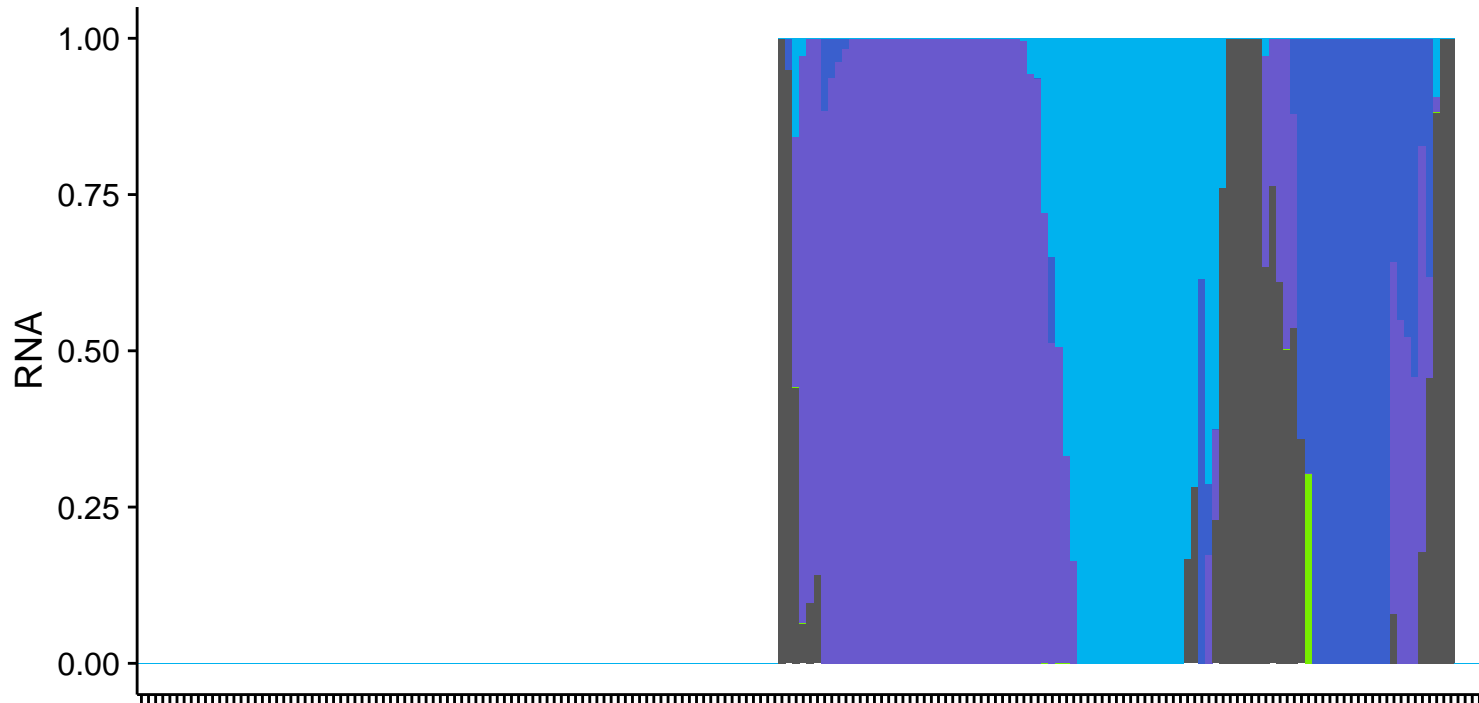

Person-week pair (RNA>0 n = 95)

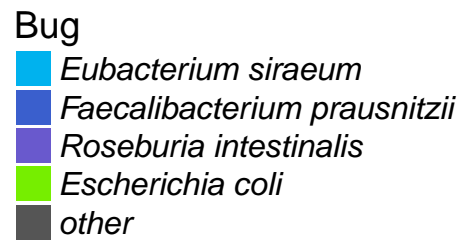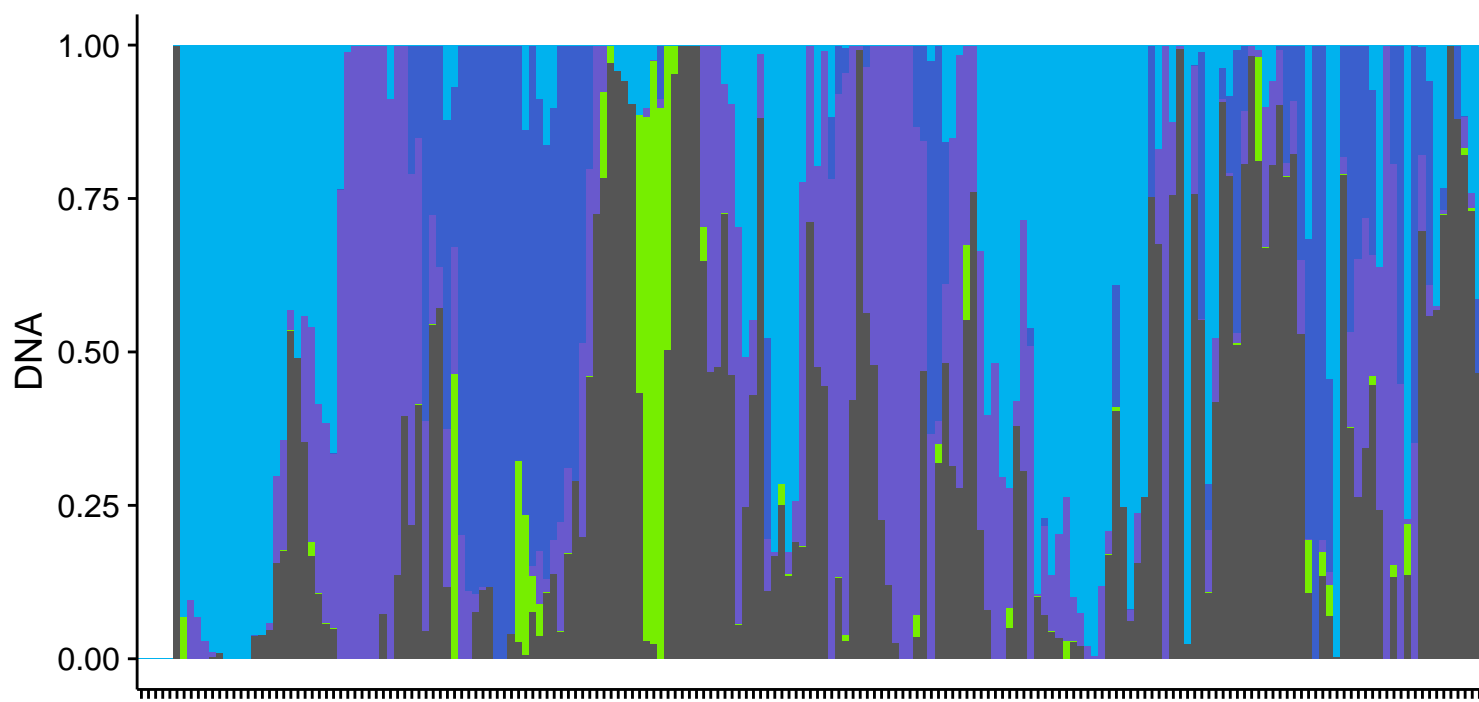

Person-week pair (DNA>0 n = 184)

# PWY-6125: superpathway of guanosine nucleotides de novo biosynthesis II

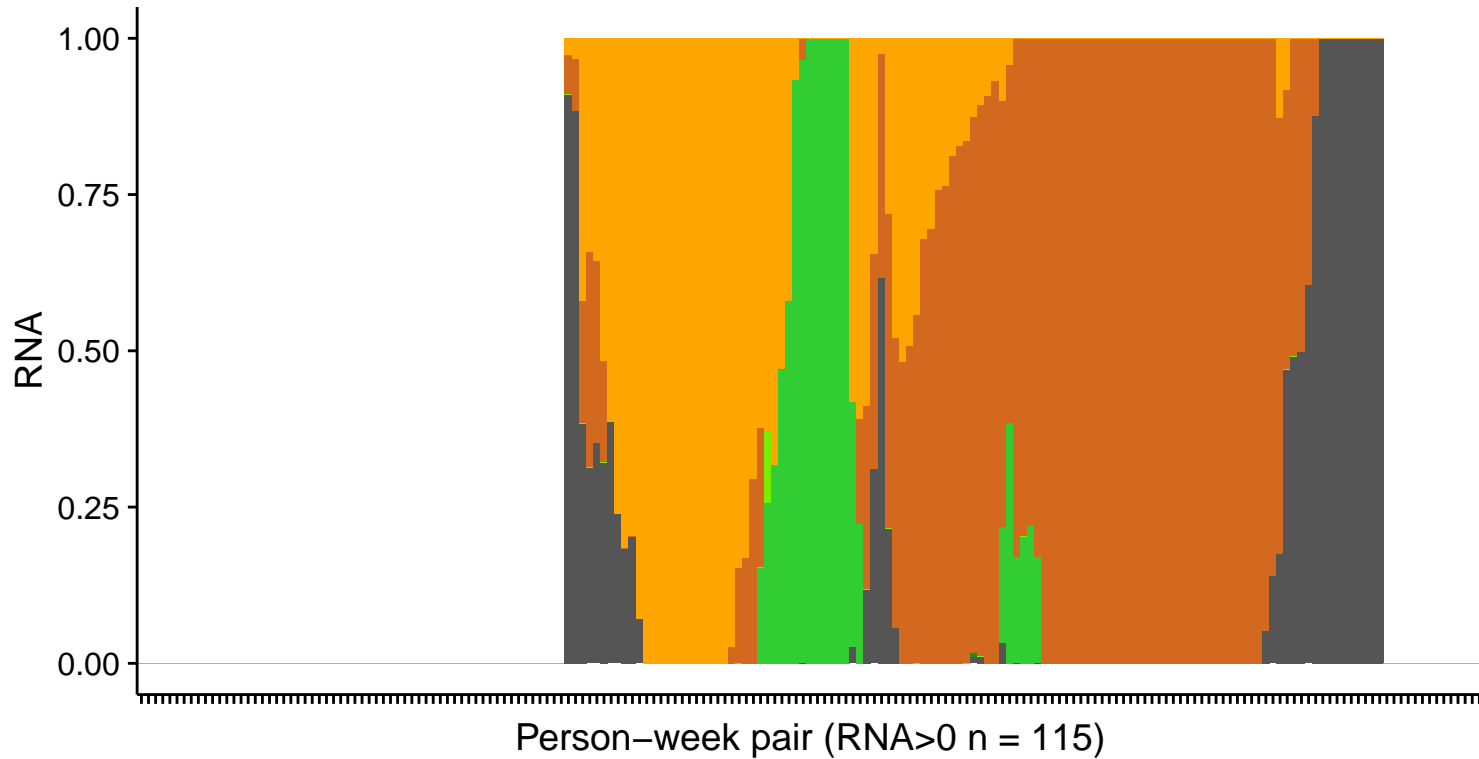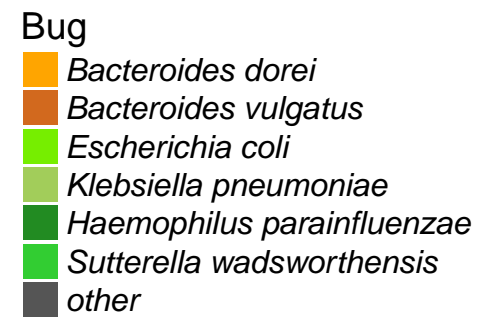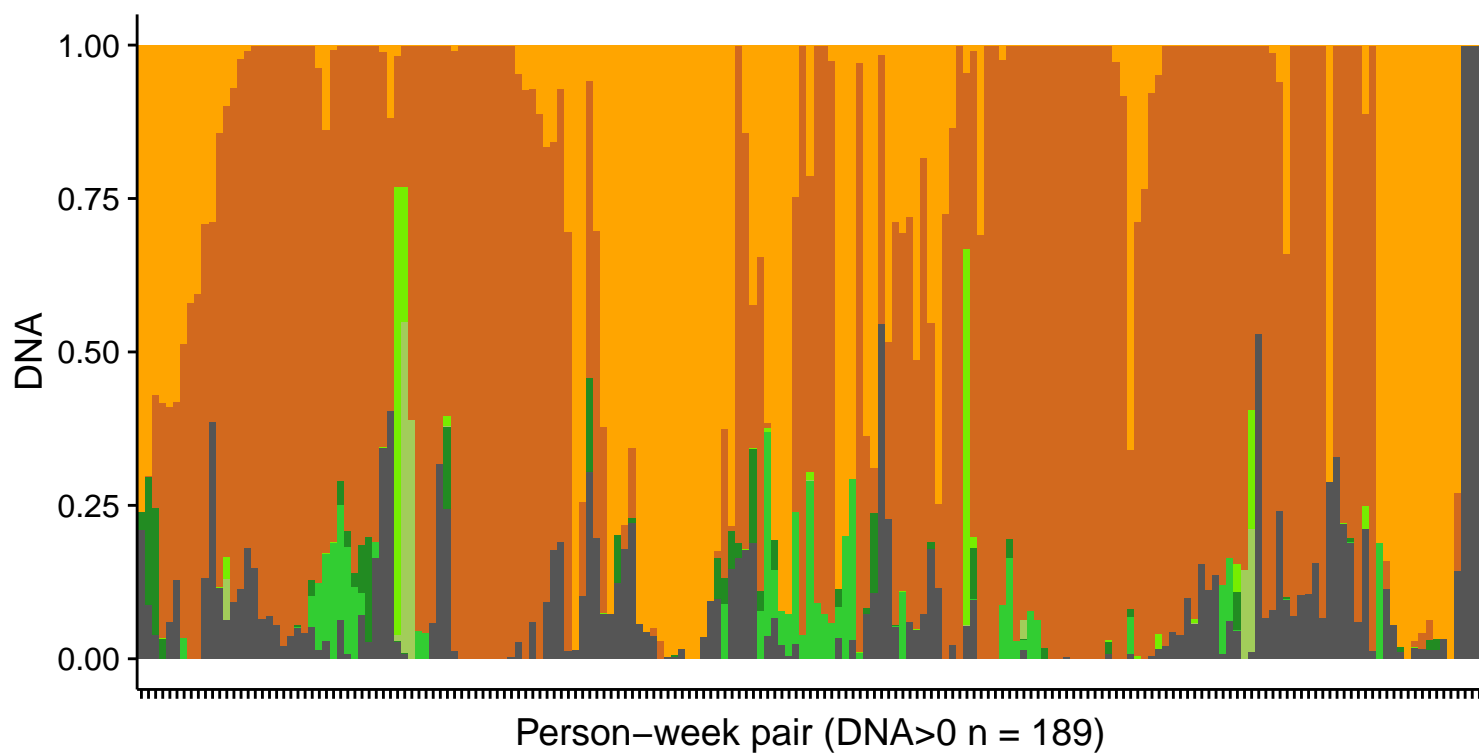

# PWY0-1479: tRNA processing

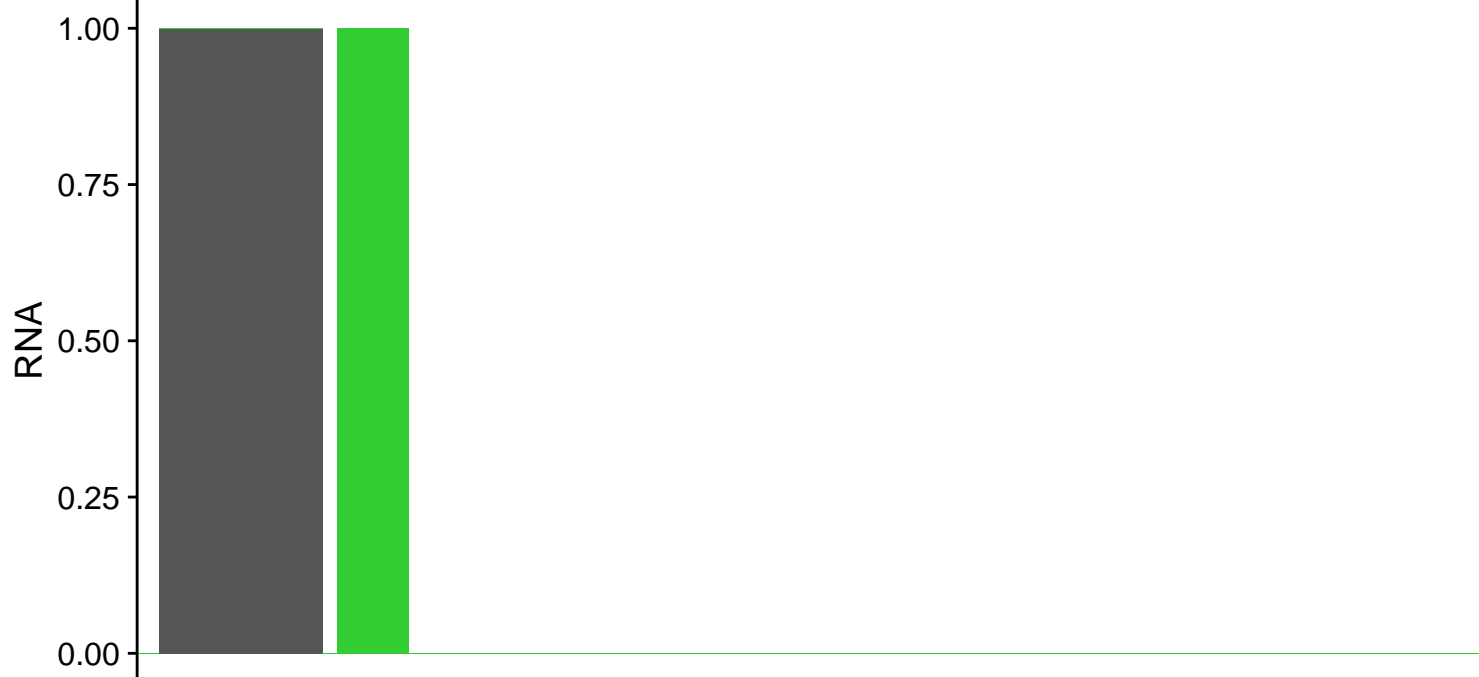

Person-week pair (RNA>0 n = 33)

Bug  
■ *Sutterella wadsworthensis*  
■ other

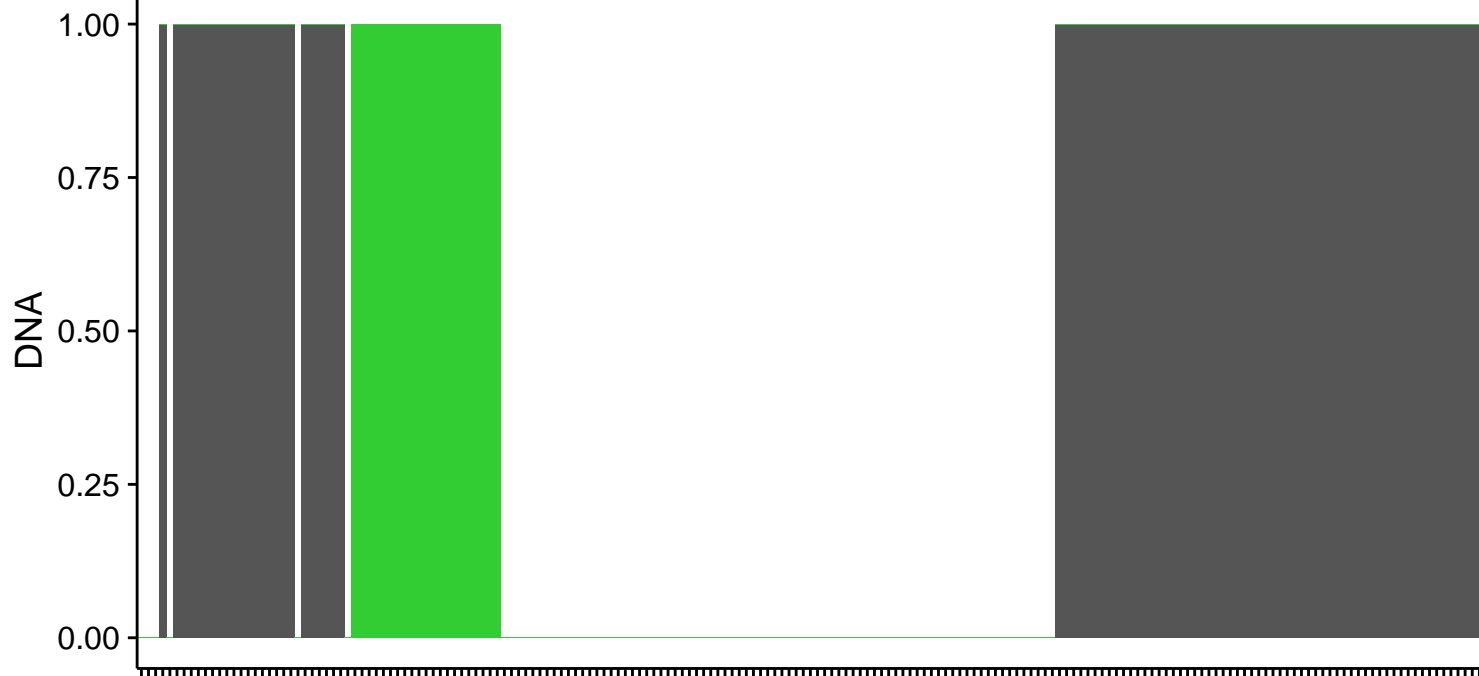

Person-week pair (DNA>0 n = 105)

# 1CMET2-PWY: N10-formyl-tetrahydrofolate biosynthesis

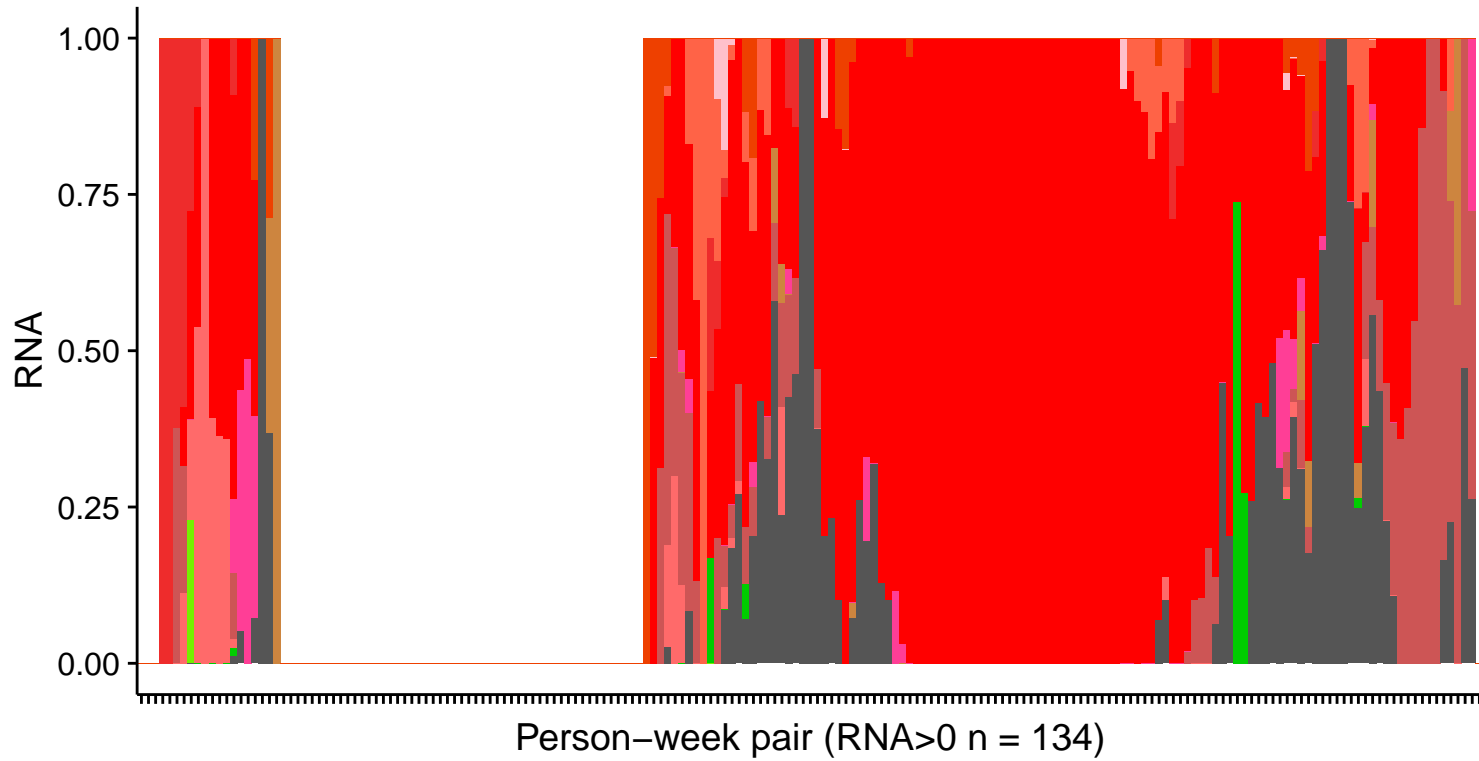

## Bug

- Bacteroides caccae*
- Bacteroides fragilis*
- Bacteroides ovatus*
- Bacteroides thetaiotaomicron*
- Bacteroides uniformis*
- Bacteroides xylanisolvens*
- Bacteroides massiliensis*
- Parabacteroides merdae*
- Parabacteroides distasonis*
- Eubacterium rectale*
- Akkermansia muciniphila*
- Escherichia coli*
- Klebsiella pneumoniae*
- other*

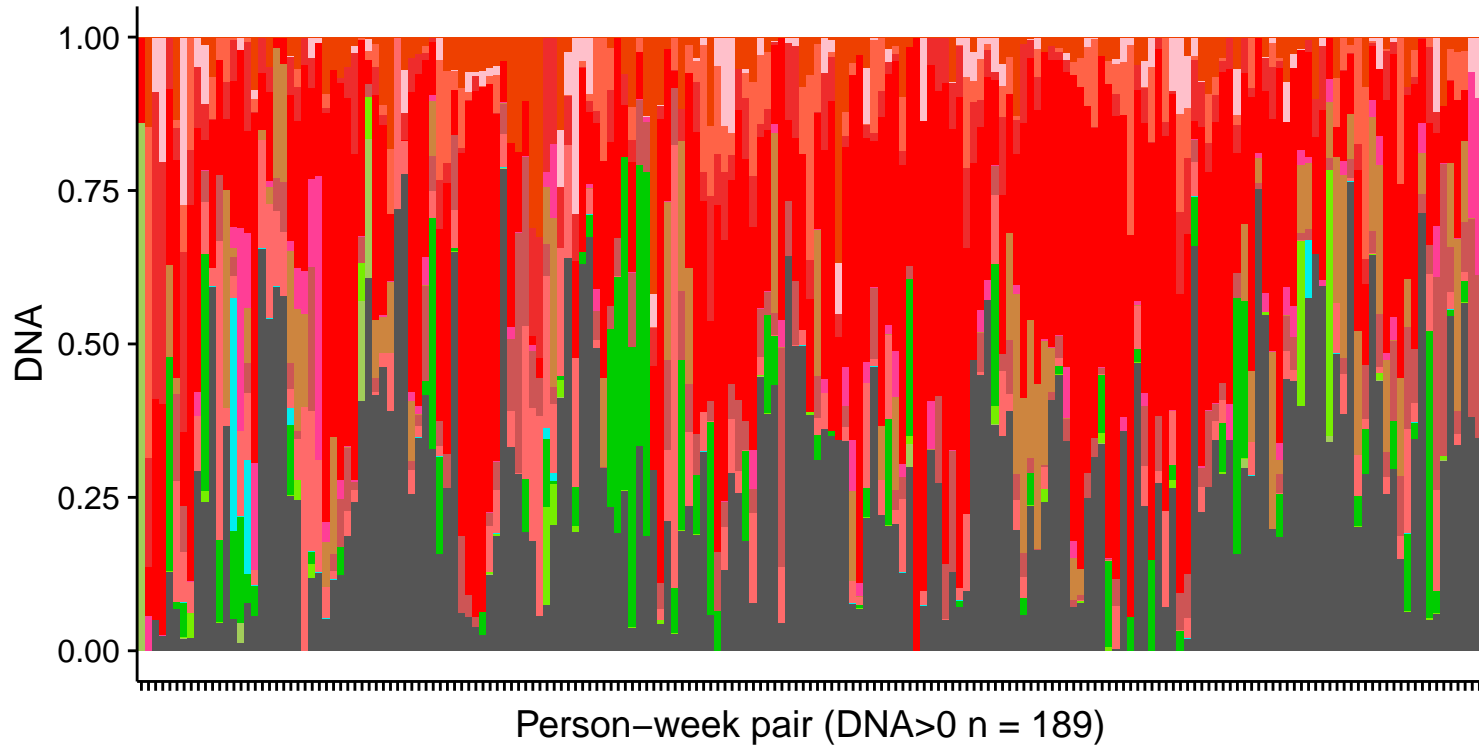



# PWY-6700: queuosine biosynthesis

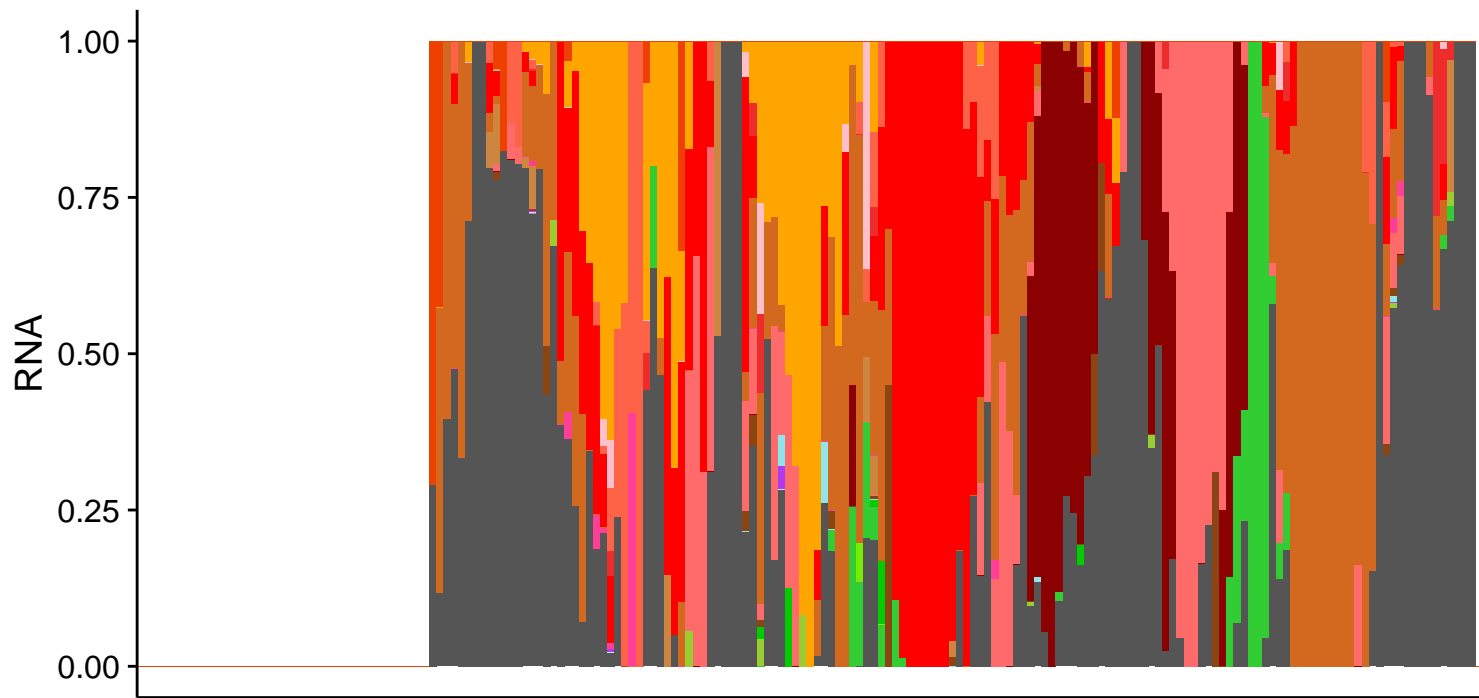

Person-week pair (RNA>0 n = 147)

- Bug
- *Bacteroides caccae*
  - *Bacteroides dorei*
  - *Bacteroides fragilis*
  - *Bacteroides ovatus*
  - *Bacteroides thetaiotaomicron*
  - *Bacteroides uniformis*
  - *Bacteroides vulgatus*
  - *Bacteroides xylanisolvens*
  - *Bacteroides massiliensis*
  - *Parabacteroides distasonis*
  - *Prevotella copri*
  - *Odoribacter splanchnicus*
  - *Eubacterium hallii*
  - *Ruminococcus torques*
  - *Anaerostipes hadrus*
  - *Lachnospiraceae bacterium 5 1 63FAA*
  - *Phascolarctobacterium succinatutens*
  - *Akkermansia muciniphila*
  - *Escherichia coli*
  - *Klebsiella pneumoniae*
  - *Haemophilus parainfluenzae*
  - *Bilophila wadsworthia*
  - *Sutterella wadsworthensis*
  - *other*

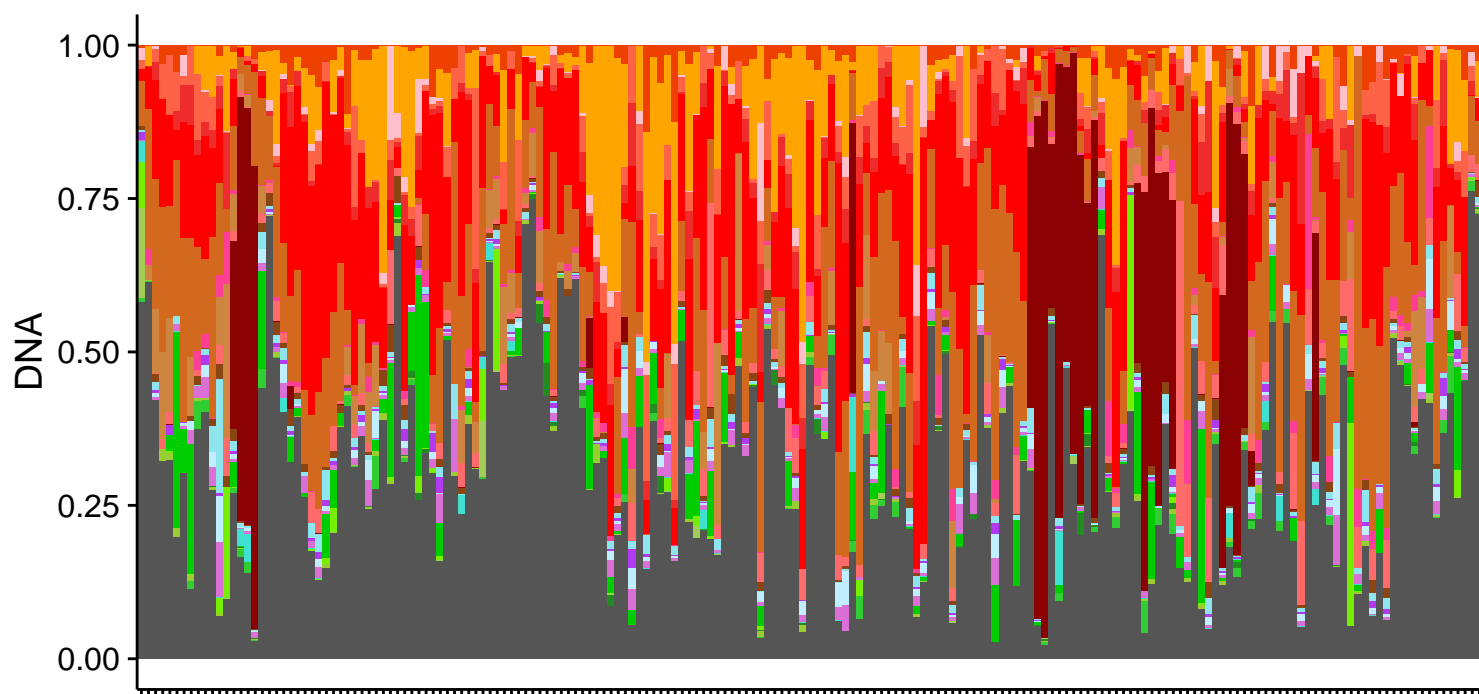

Person-week pair (DNA>0 n = 189)

# PWY-5659: GDP-mannose biosynthesis

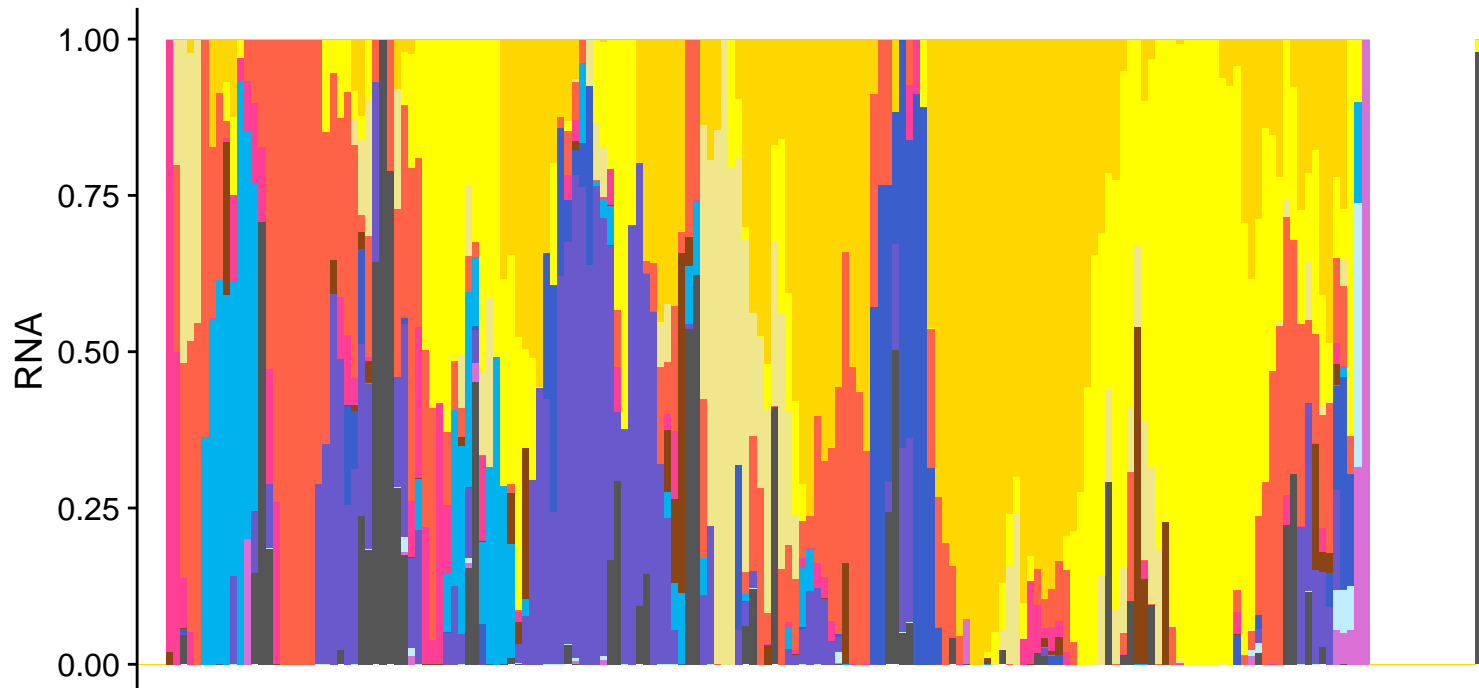

## Bug

- Alistipes onderdonkii*
- Alistipes shahii*
- Alistipes finegoldii*
- Bacteroides ovatus*
- Bacteroides xylanisolvens*
- Odoribacter splanchnicus*
- Eubacterium siraeum*
- Faecalibacterium prausnitzii*
- Roseburia intestinalis*
- Anaerostipes hadrus*
- Lachnospiraceae bacterium 5\_1\_63FAA*
- Escherichia coli*
- other

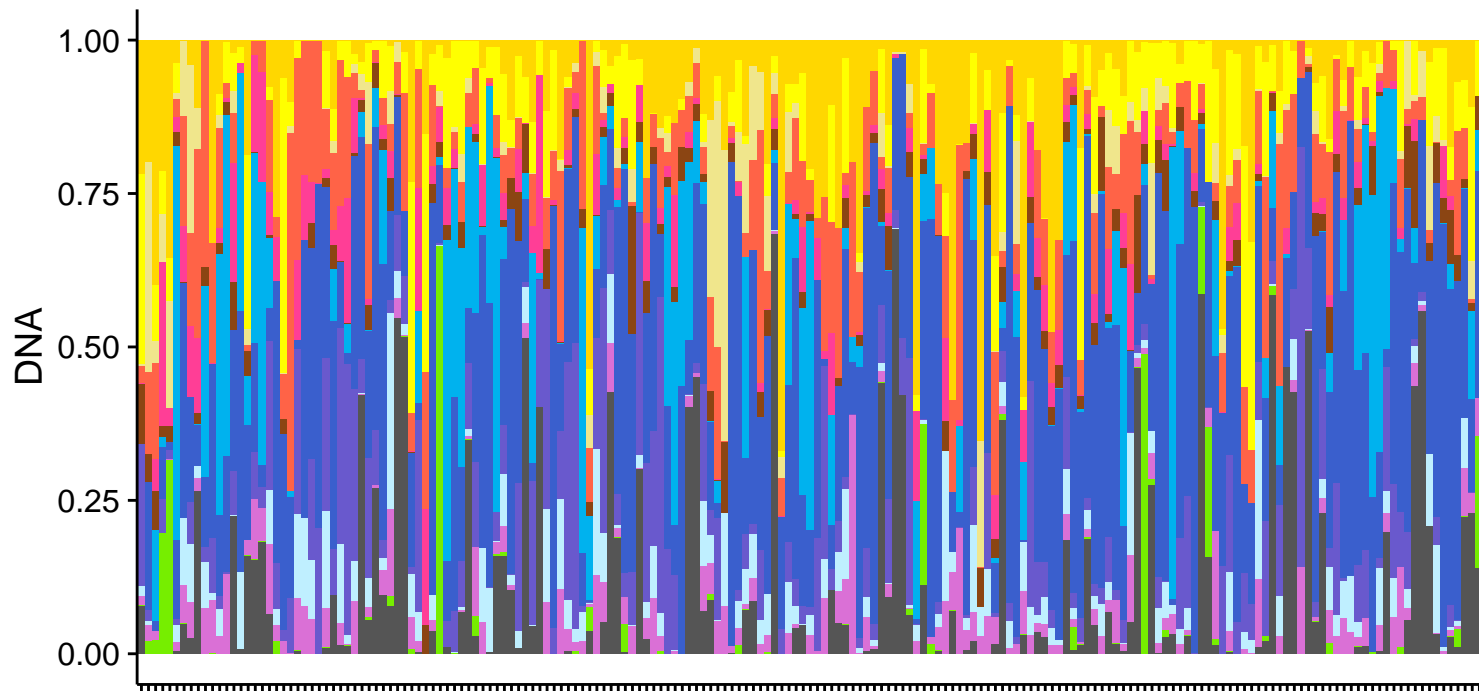

# PANTO-PWY: phosphopantothenate biosynthesis I

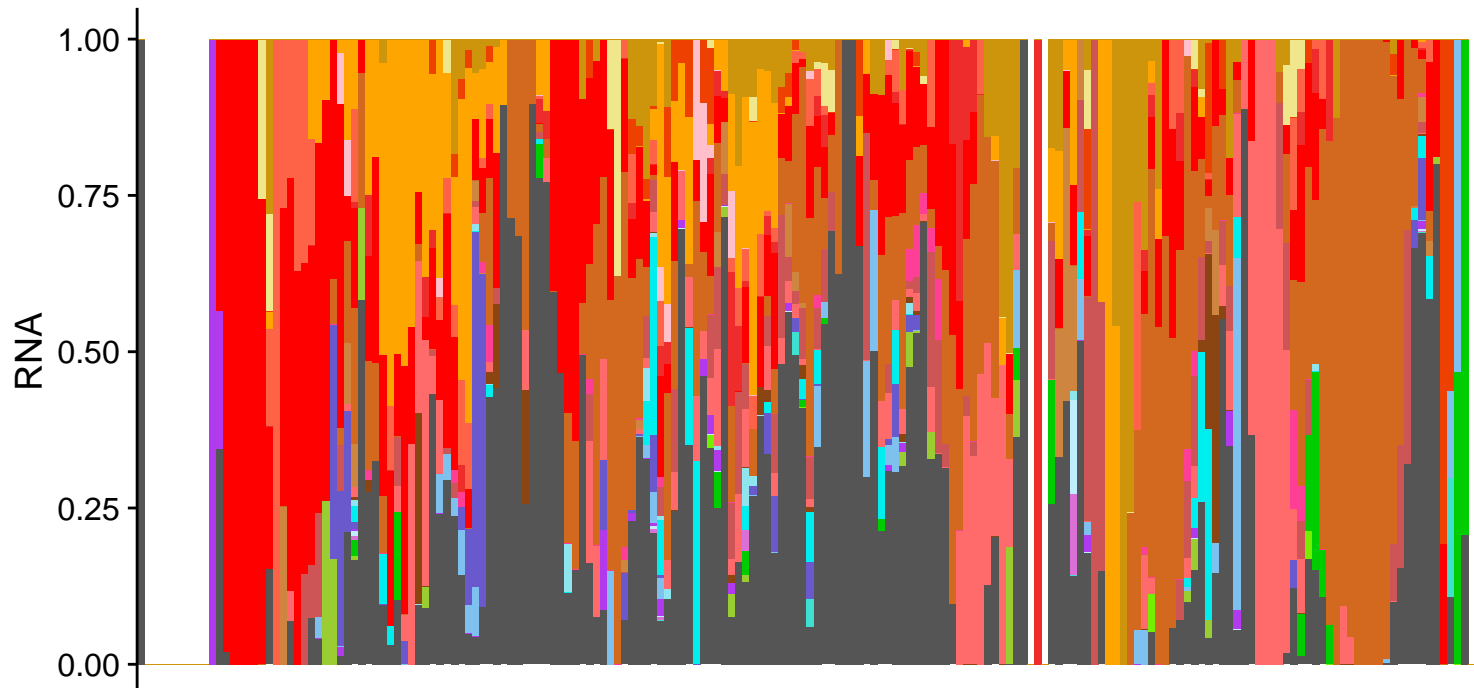

Person-week pair (RNA>0 n = 176)

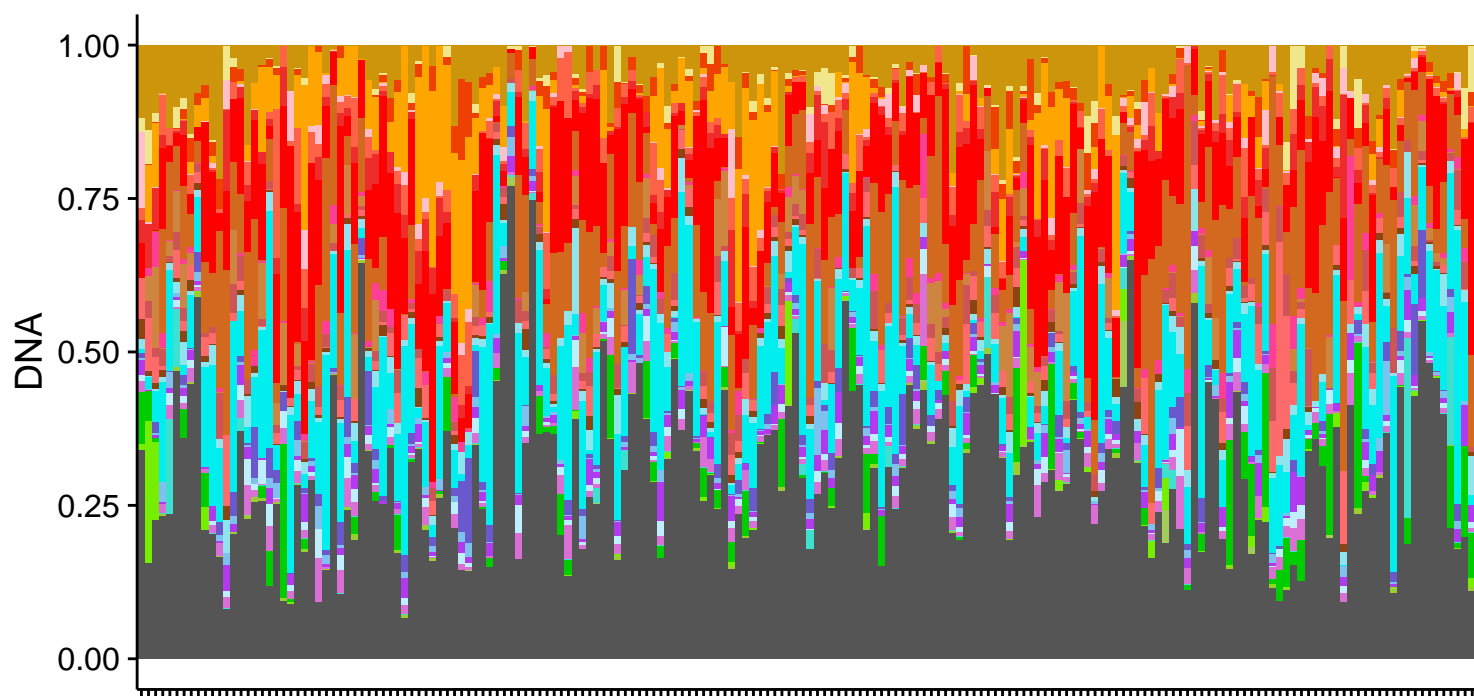

Person-week pair (DNA>0 n = 189)

## Bug

- Alistipes putredinis*
- Alistipes finegoldii*
- Bacteroides caccae*
- Bacteroides dorei*
- Bacteroides fragilis*
- Bacteroides ovatus*
- Bacteroides thetaiotaomicron*
- Bacteroides uniformis*
- Bacteroides vulgatus*
- Bacteroides massiliensis*
- Parabacteroides merdae*
- Parabacteroides distasonis*
- Odoribacter splanchnicus*
- Eubacterium hallii*
- Eubacterium rectale*
- Roseburia intestinalis*
- Roseburia hominis*
- Ruminococcus torques*
- Anaerostipes hadrus*
- Lachnospiraceae bacterium 5 1 63FAA*
- Phascolarctobacterium succinatutens*
- Rothia mucilaginosa*
- Akkermansia muciniphila*
- Escherichia coli*
- Klebsiella pneumoniae*
- Bilophila wadsworthia*
- other

# PWY-1269: CMP-3-deoxy-D-manno-octulosonate biosynthesis I

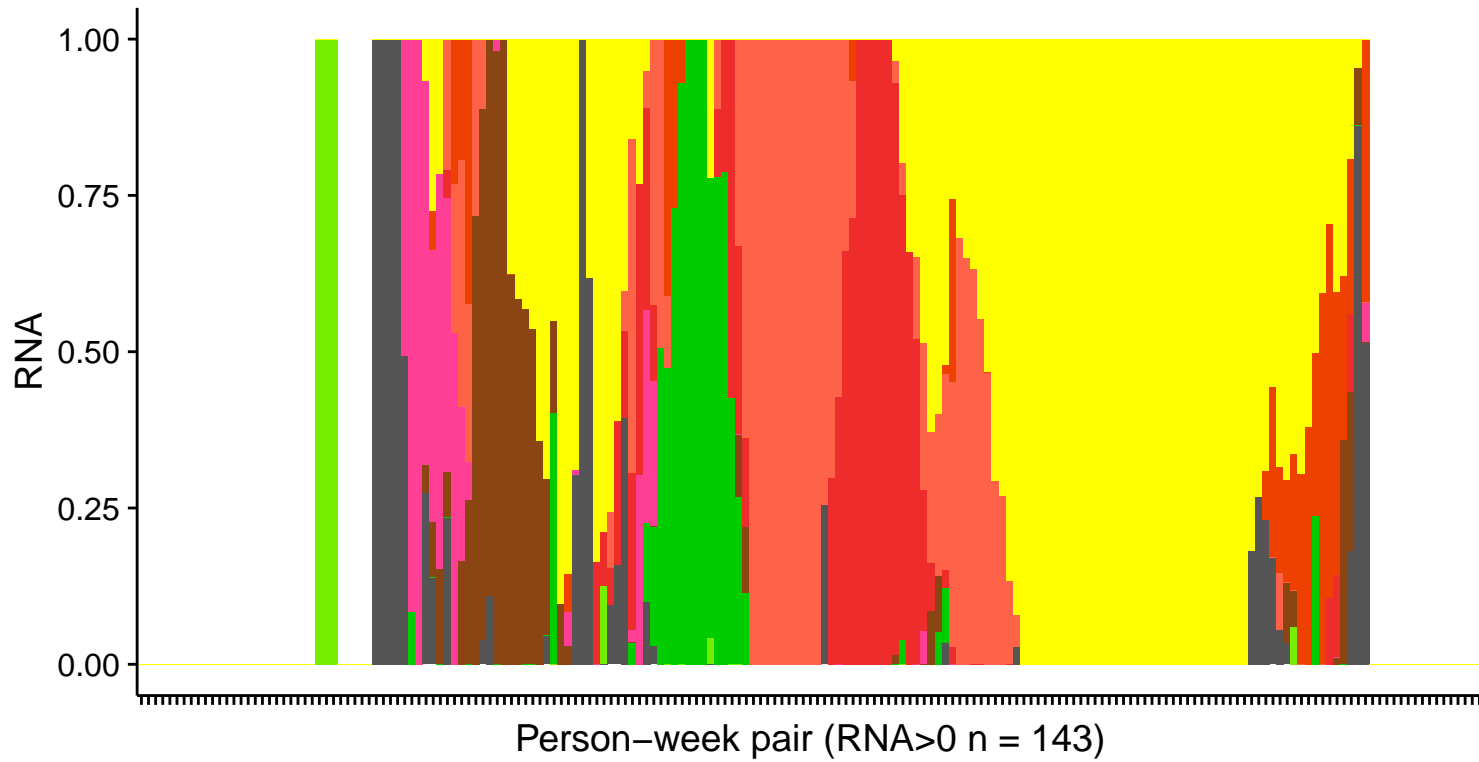

## Bug

- Alistipes shahii*
- Bacteroides caccae*
- Bacteroides ovatus*
- Bacteroides thetaiotaomicron*
- Bacteroides xylanisolvans*
- Odoribacter splanchnicus*
- Akkermansia muciniphila*
- Escherichia coli*
- Klebsiella pneumoniae*
- Haemophilus parainfluenzae*
- other

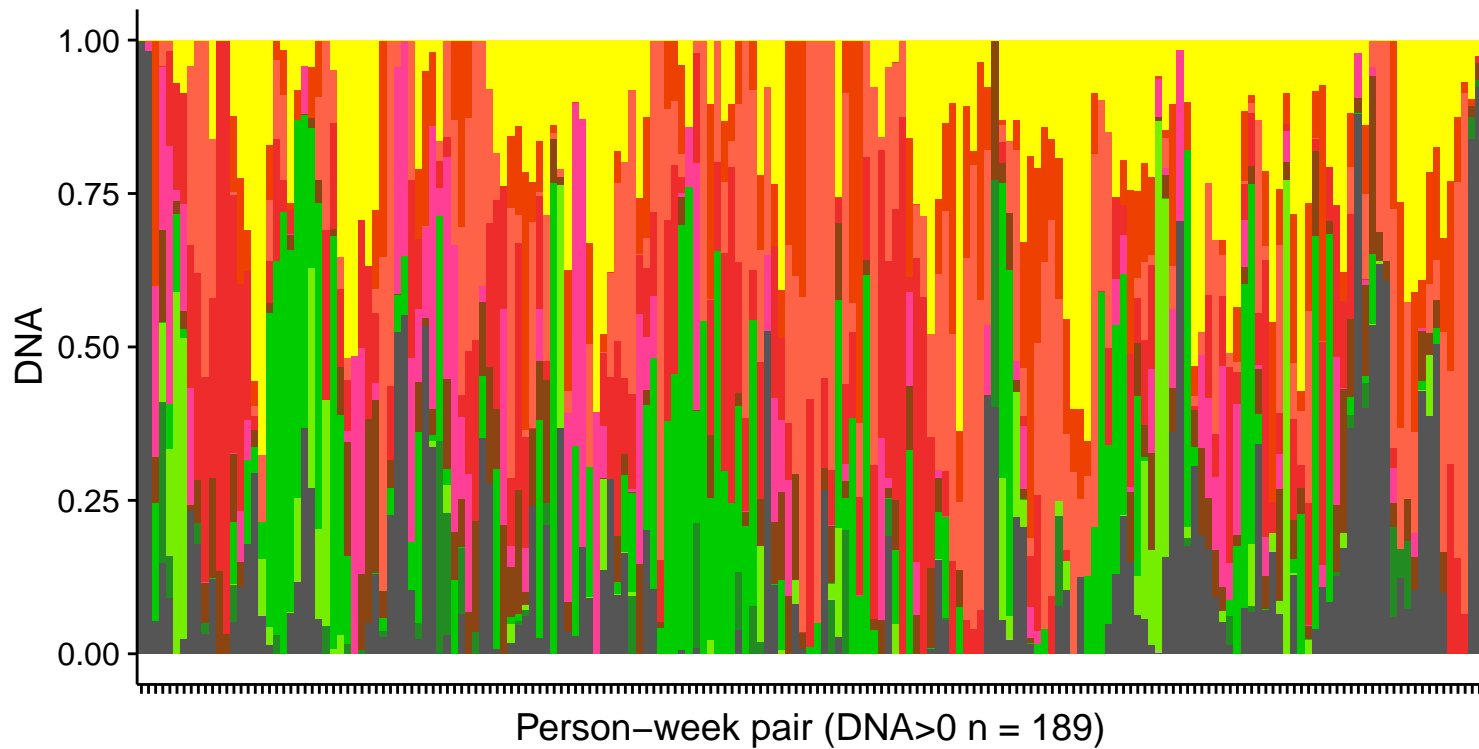

# NAGLIPASYN-PWY: lipid IVA biosynthesis

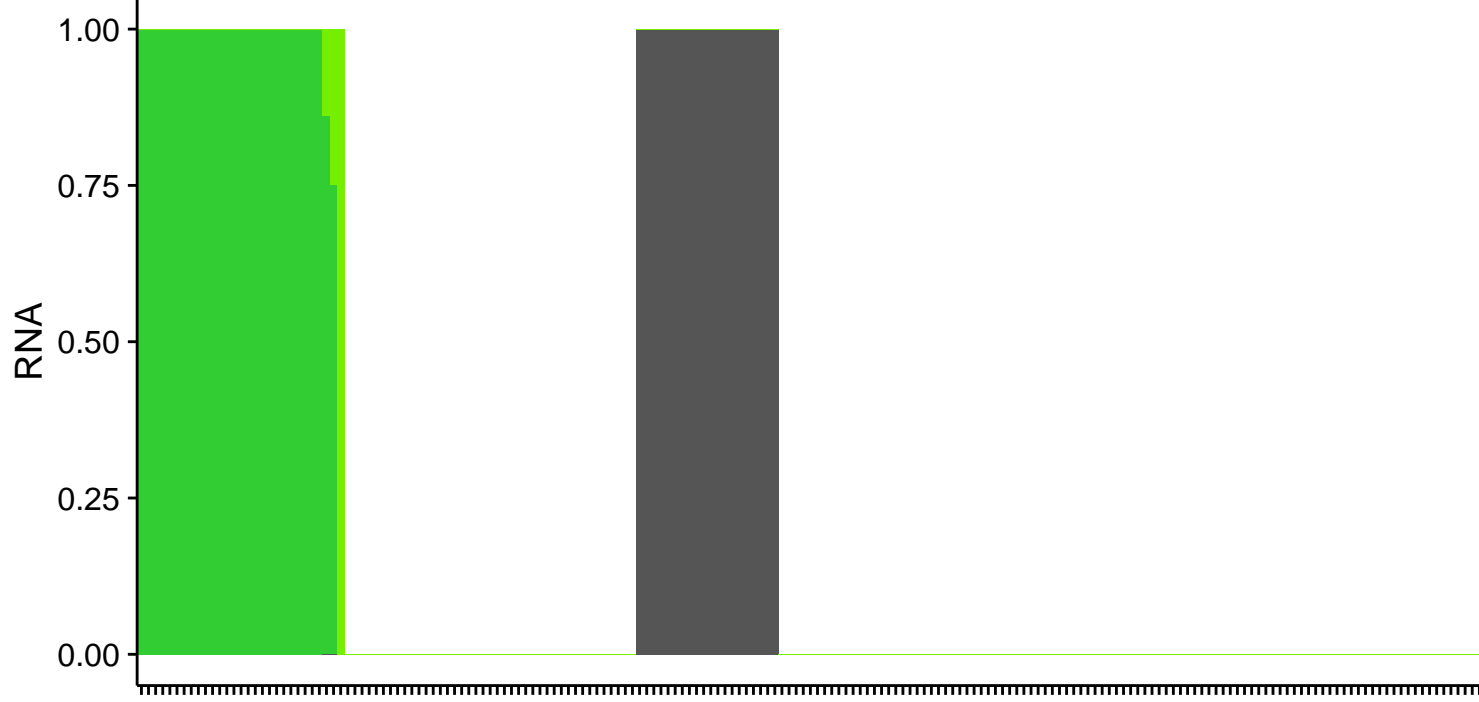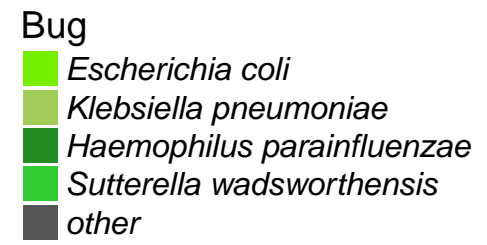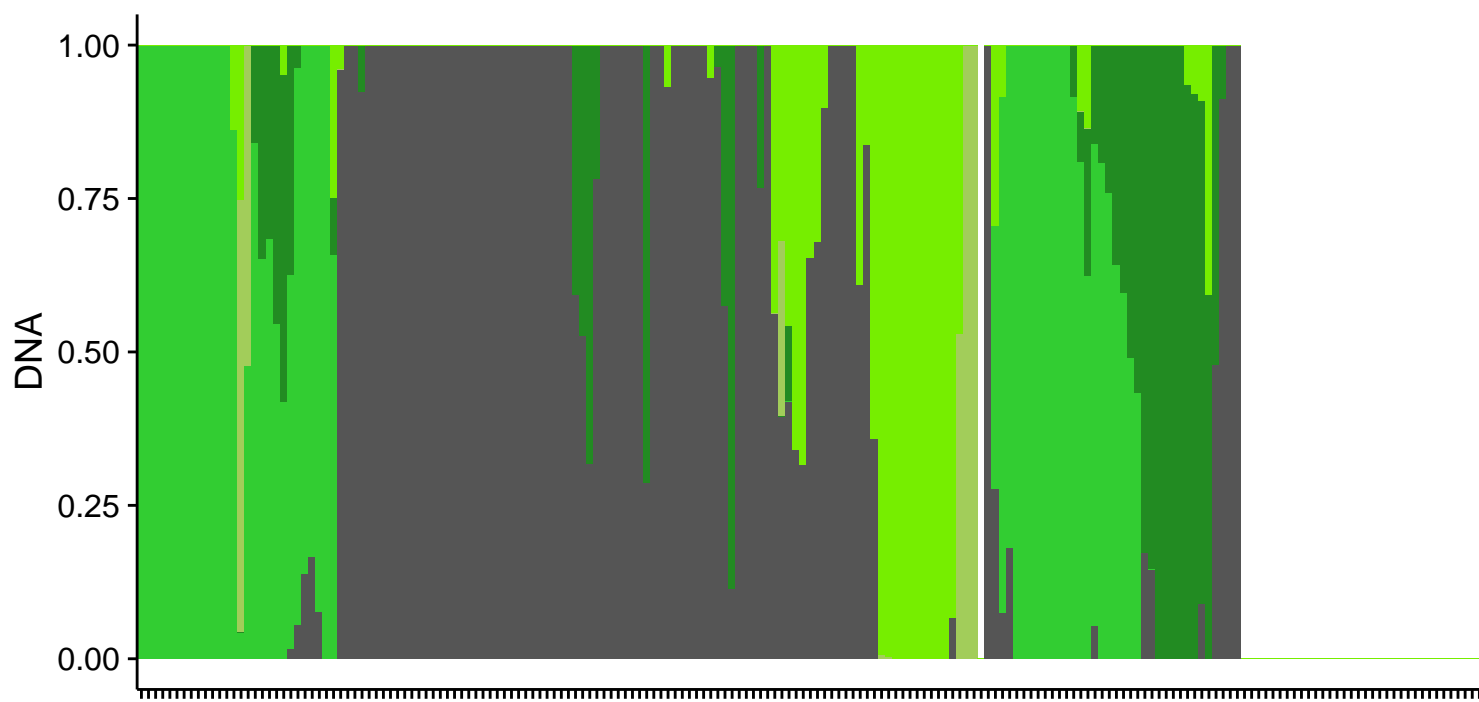

# PWY-5686: UMP biosynthesis

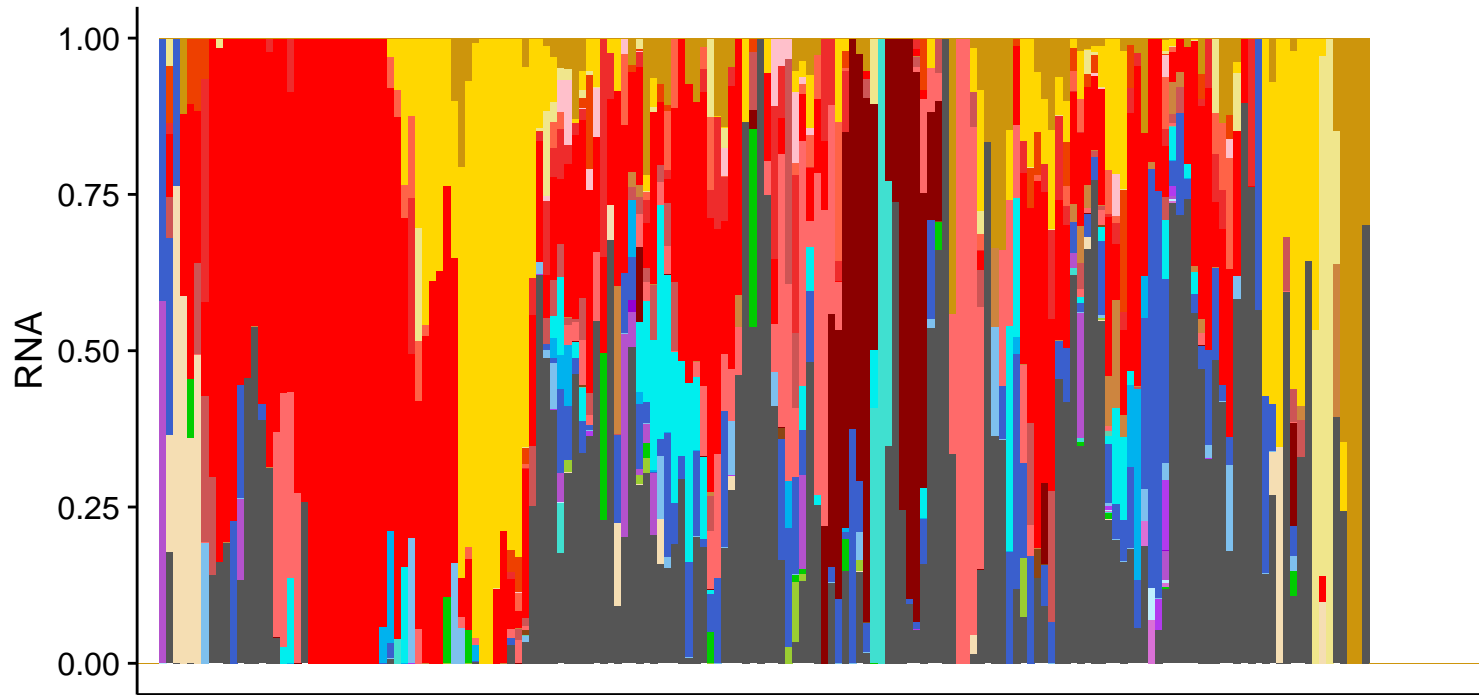

Person-week pair (RNA>0 n = 170)

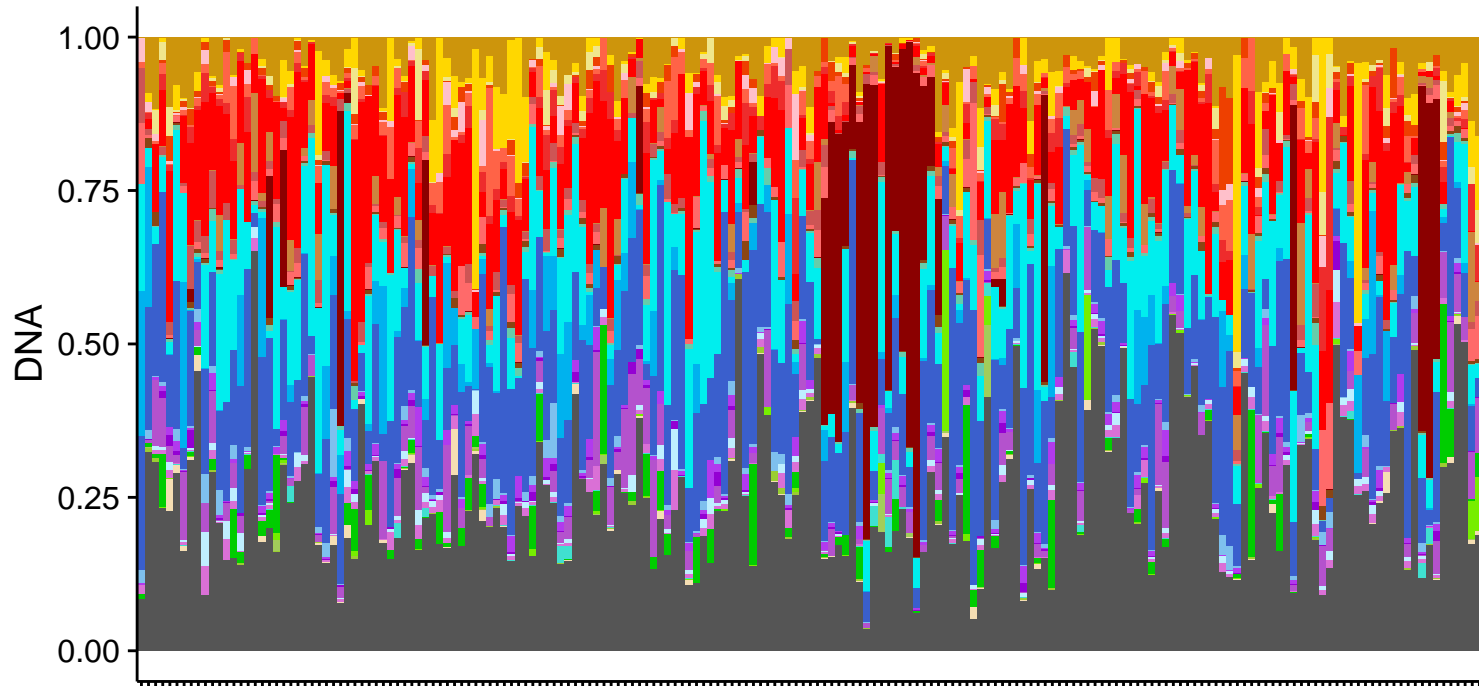

Person-week pair (DNA>0 n = 189)

## Bug

- Alistipes putredinis*
- Alistipes onderdonkii*
- Alistipes finegoldii*
- Bacteroides caccae*
- Bacteroides fragilis*
- Bacteroides ovatus*
- Bacteroides thetaiotaomicron*
- Bacteroides uniformis*
- Bacteroides massiliensis*
- Parabacteroides merdae*
- Parabacteroides distasonis*
- Prevotella copri*
- Odoribacter splanchnicus*
- Coprococcus comes*
- Eubacterium rectale*
- Eubacterium siraeum*
- Faecalibacterium prausnitzii*
- Roseburia hominis*
- Ruminococcus torques*
- Ruminococcus obeum*
- Ruminococcus bromii*
- Anaerostipes hadrus*
- Lachnospiraceae bacterium 5\_1\_63FAA*
- Phascolarctobacterium succinatutens*
- Akkermansia muciniphila*
- Escherichia coli*
- Klebsiella pneumoniae*
- Bilophila wadsworthia*
- Methanobrevibacter smithii*
- other*

# PWY-5384: sucrose degradation IV (sucrose phosphorylase)

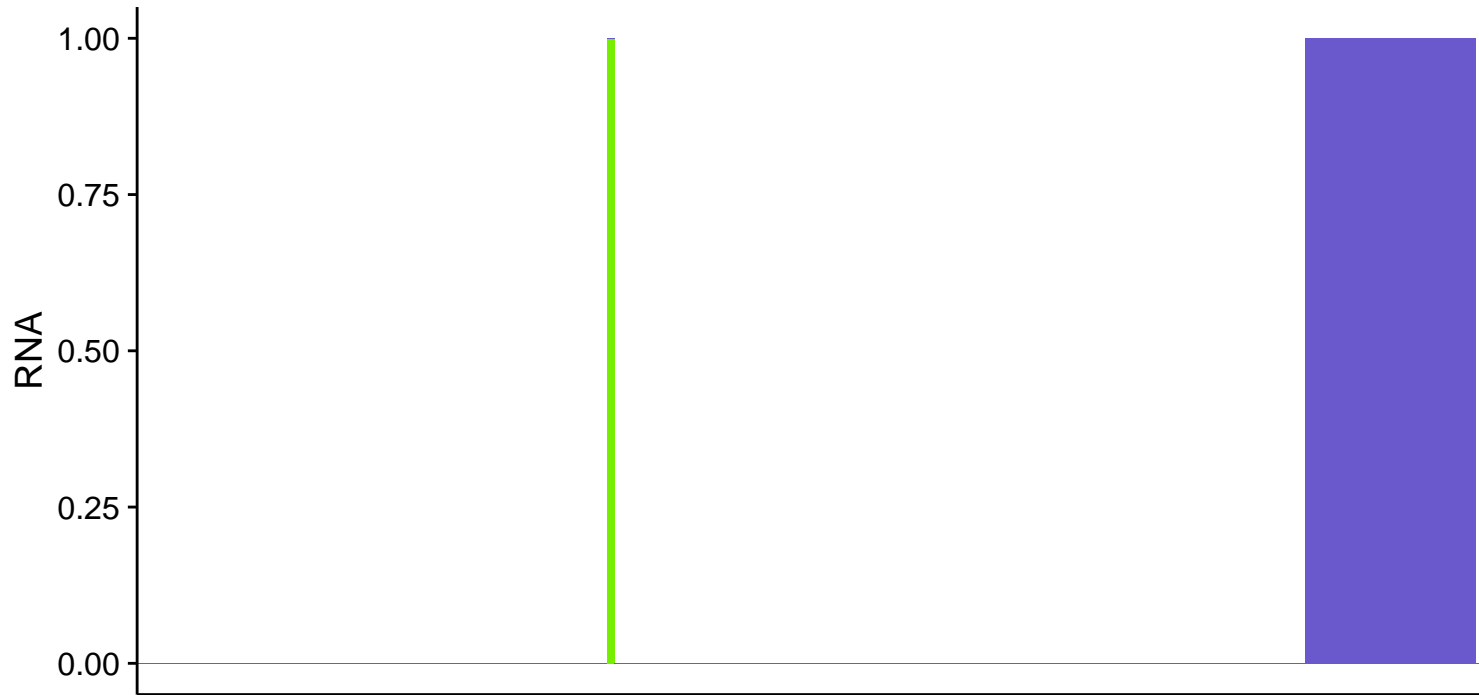

Person-week pair (RNA>0 n = 25)

## Bug

- Roseburia intestinalis*
- Escherichia coli*
- other

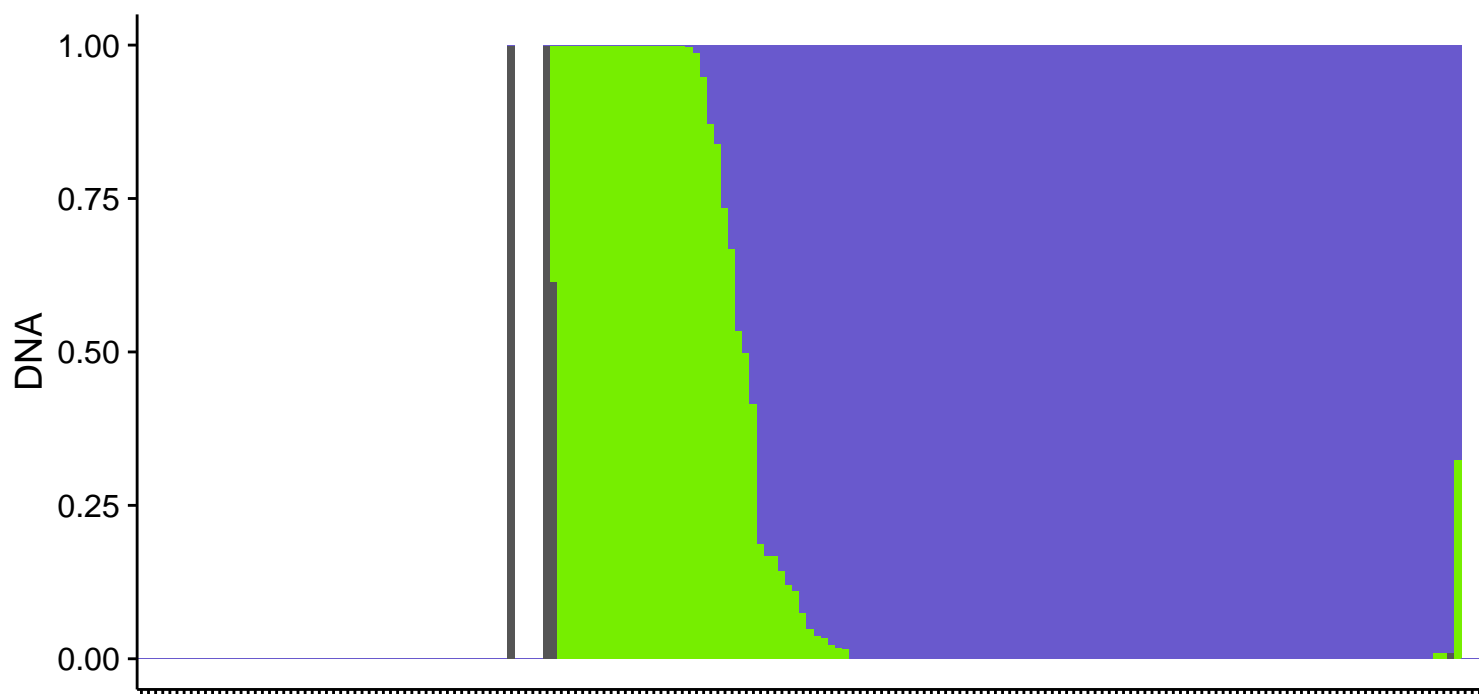

Person-week pair (DNA>0 n = 130)

# PWY-7371: 1,4-dihydroxy-6-naphthoate biosynthesis II

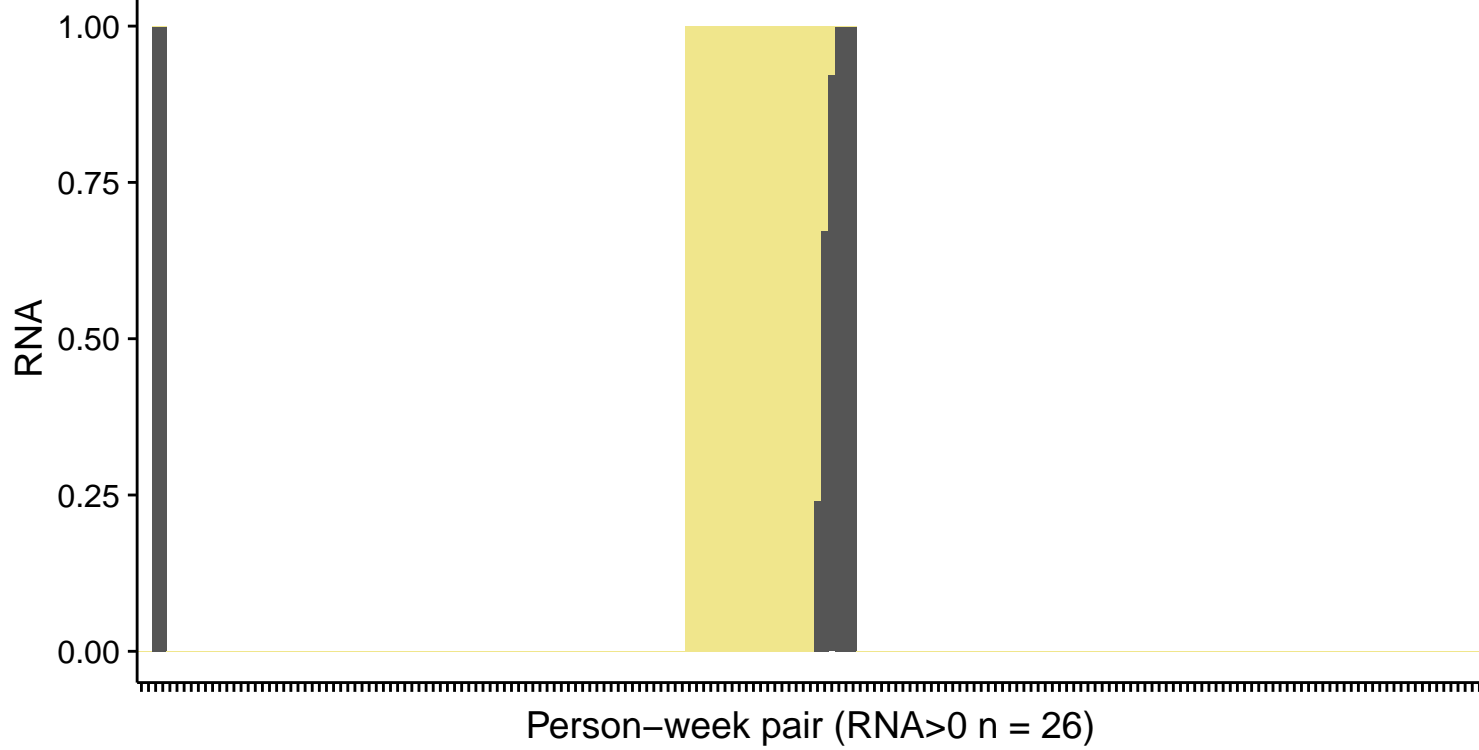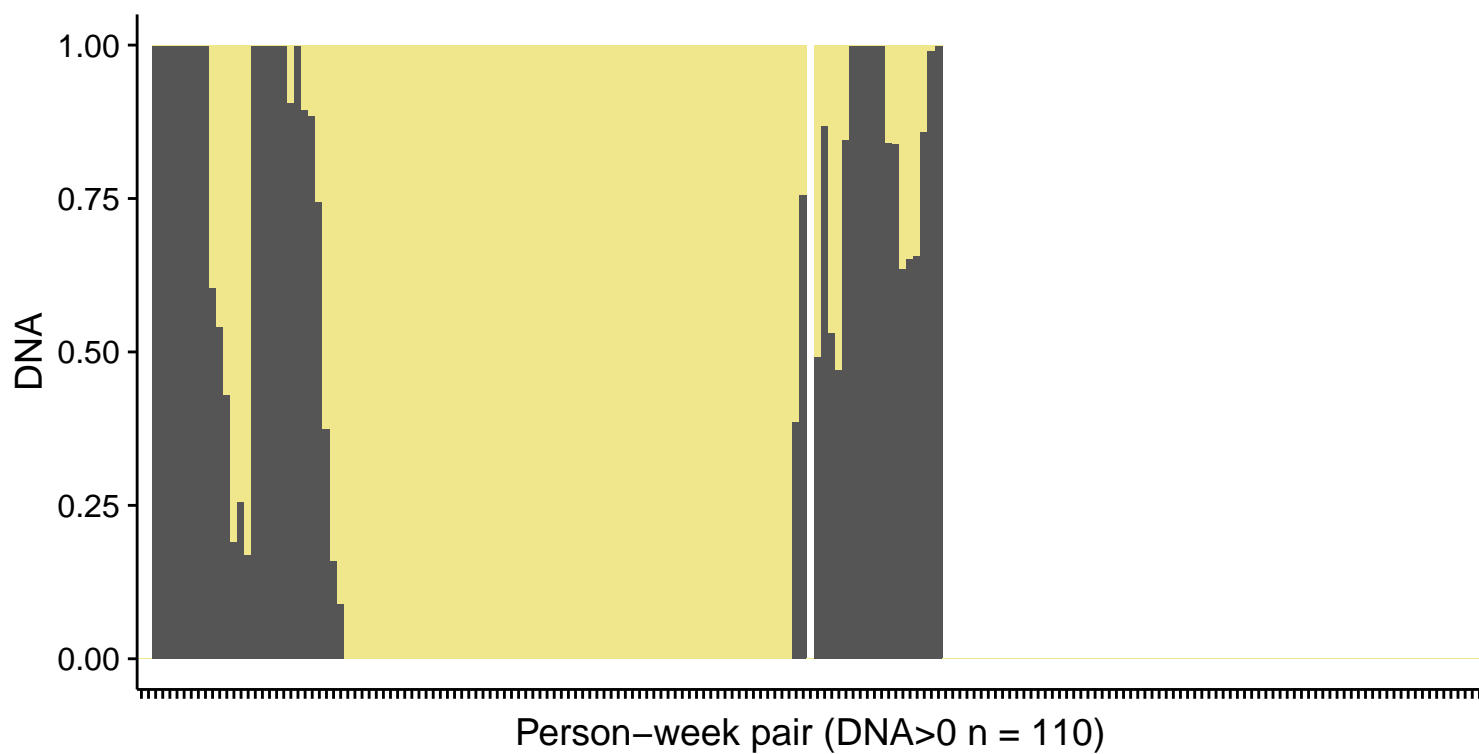



# PWY-7208: superpathway of pyrimidine nucleobases salvage

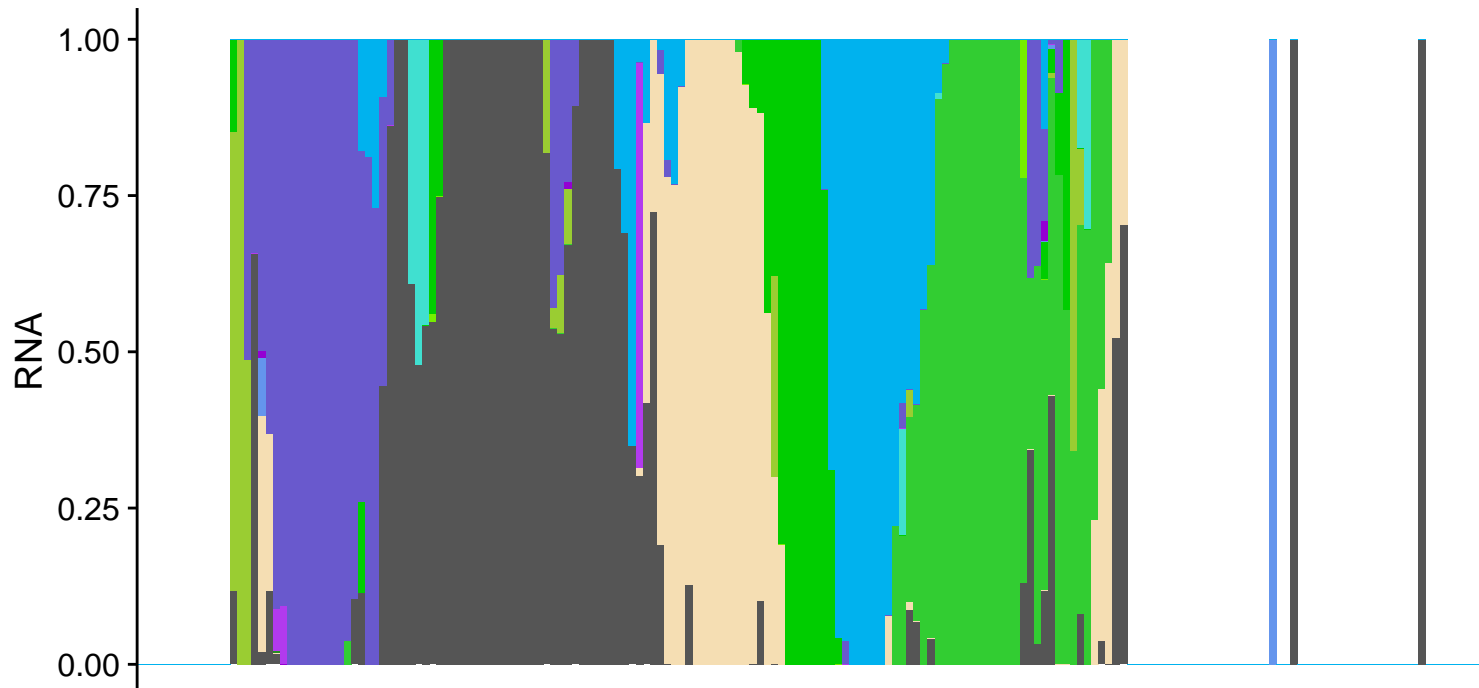

Person-week pair (RNA>0 n = 129)

## Bug

- Eubacterium siraeum*
- Roseburia intestinalis*
- Ruminococcus torques*
- Ruminococcus obeum*
- Streptococcus salivarius*
- Phascolarctobacterium succinatutens*
- Akkermansia muciniphila*
- Escherichia coli*
- Klebsiella pneumoniae*
- Haemophilus parainfluenzae*
- Bilophila wadsworthia*
- Sutterella wadsworthensis*
- Methanobrevibacter smithii*
- other

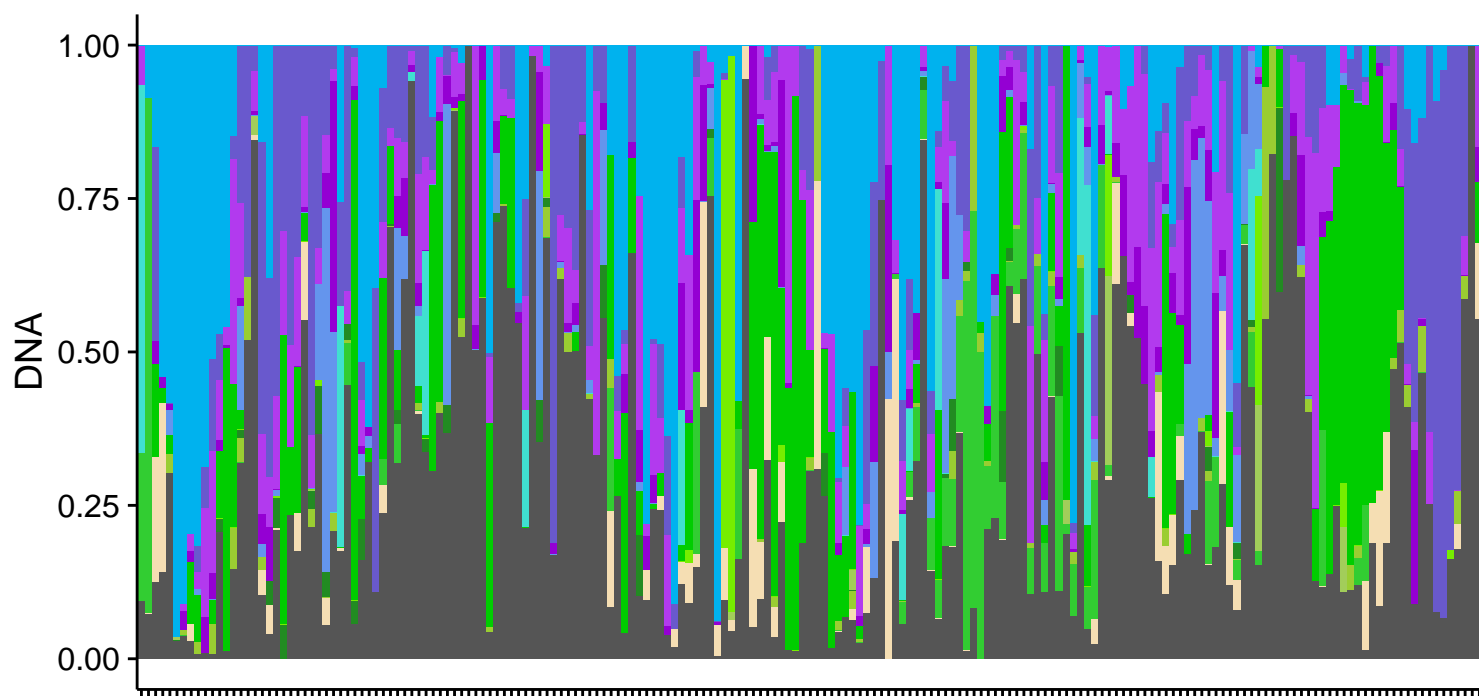

Person-week pair (DNA>0 n = 189)

# PYRIDOXSYN-PWY: pyridoxal 5'-phosphate biosynthesis I

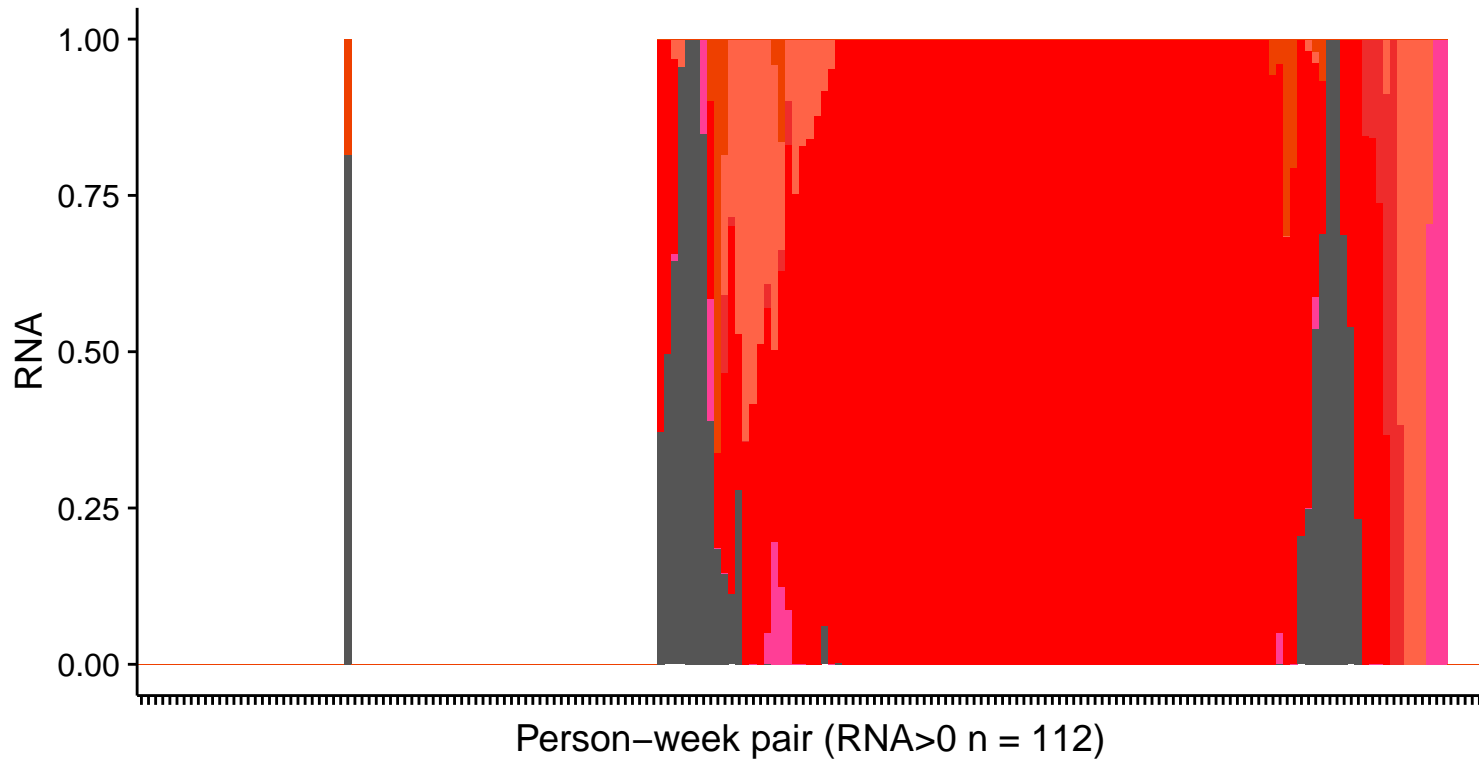

## Bug

- Bacteroides caccae*
- Bacteroides fragilis*
- Bacteroides ovatus*
- Bacteroides thetaiotaomicron*
- Bacteroides uniformis*
- Bacteroides xylanisolvens*
- other

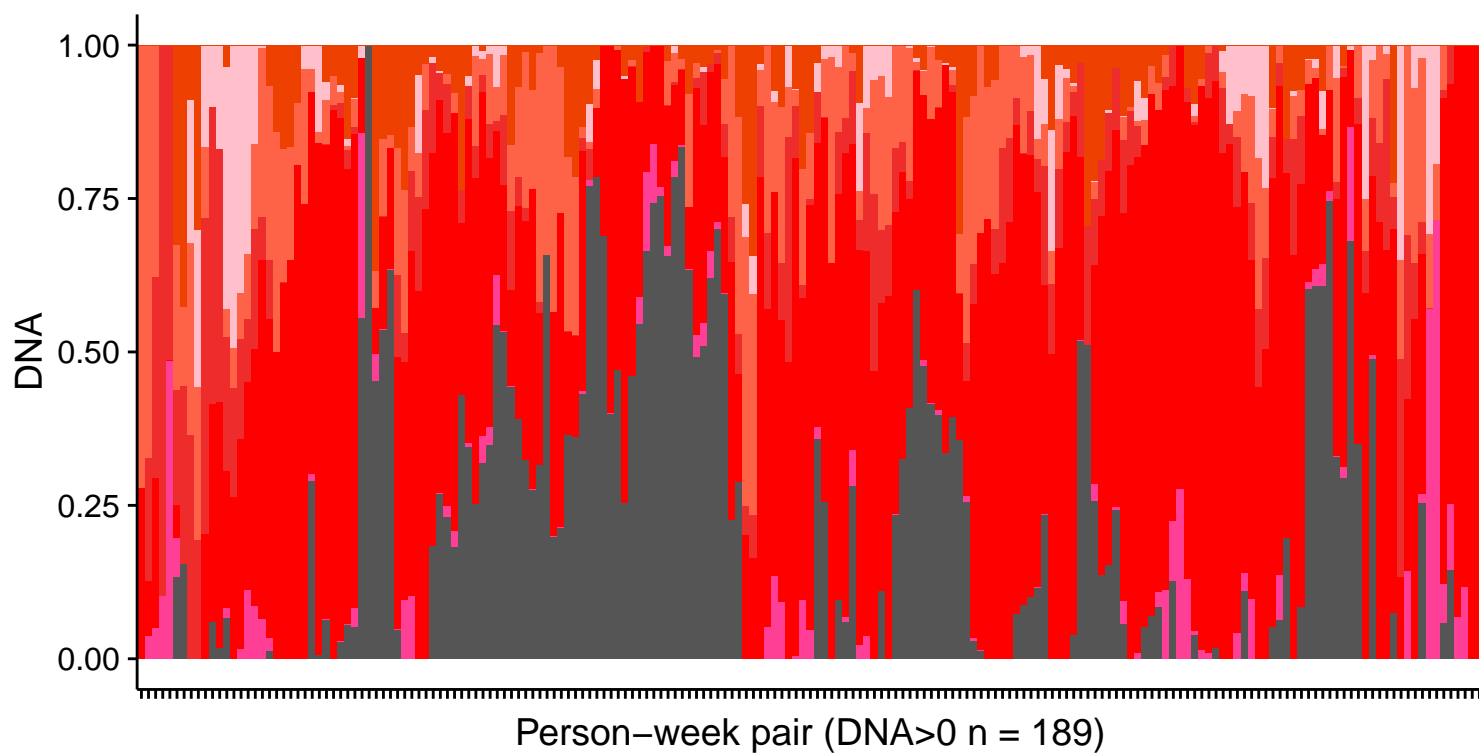

# PWY-6122: 5-aminoimidazole ribonucleotide biosynthesis II

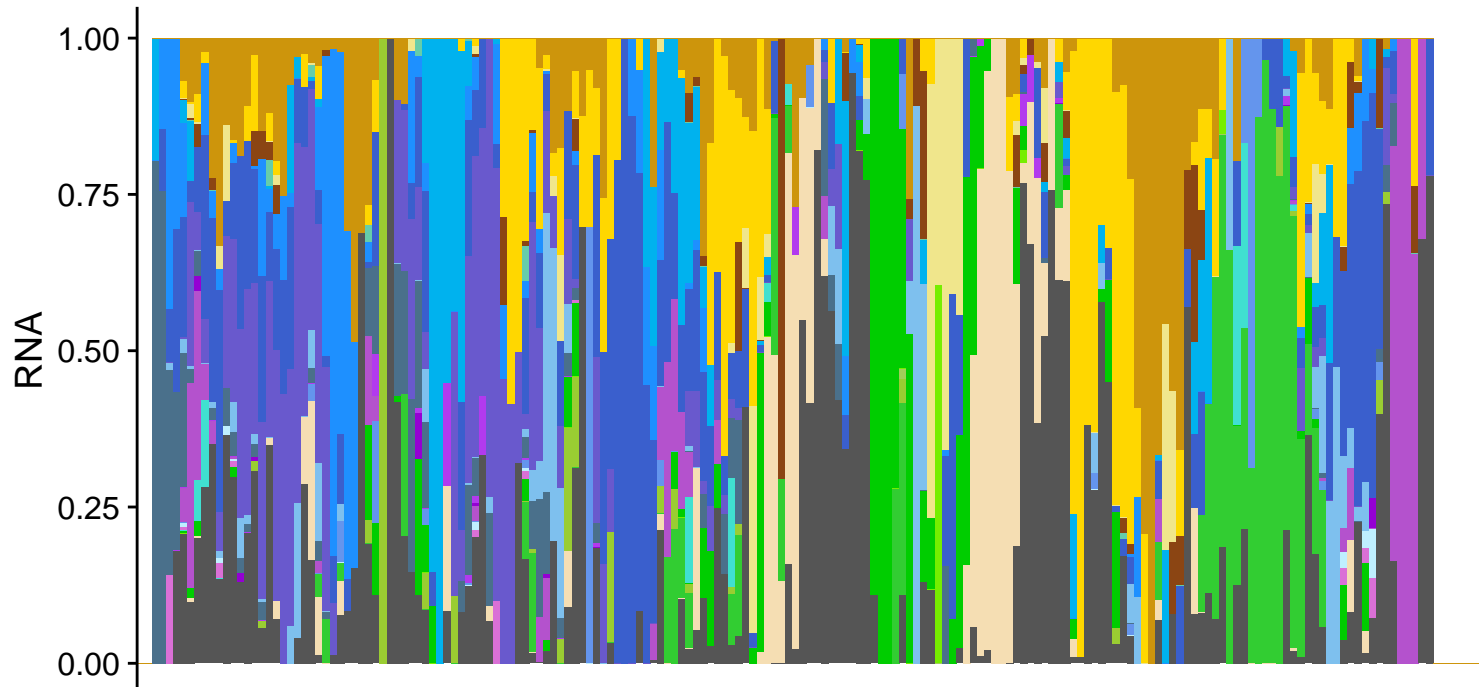

Person-week pair (RNA>0 n = 180)

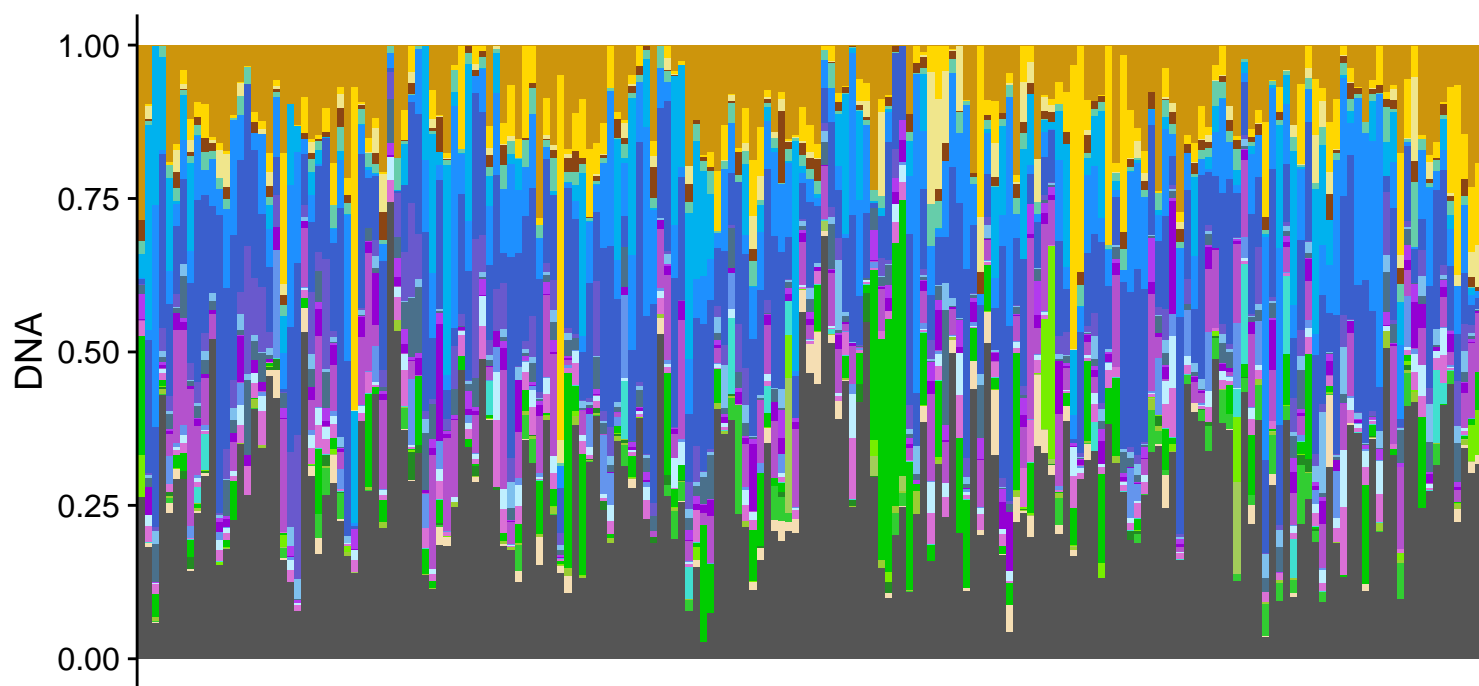

Person-week pair (DNA>0 n = 189)

## Bug

- Alistipes putredinis*
- Alistipes onderdonkii*
- Alistipes finegoldii*
- Odoribacter splanchnicus*
- Coprococcus comes*
- Eubacterium siraeum*
- Eubacterium eligens*
- Faecalibacterium prausnitzii*
- Roseburia intestinalis*
- Roseburia hominis*
- Streptococcus salivarius*
- Anaerostipes hadrus*
- Lachnospiraceae bacterium 5\_1\_63FAA*
- Phascolarctobacterium succinatutens*
- Rothia mucilaginosa*
- Akkermansia muciniphila*
- Escherichia coli*
- Klebsiella pneumoniae*
- Haemophilus parainfluenzae*
- Bilophila wadsworthia*
- Sutterella wadsworthensis*
- Methanobrevibacter smithii*
- other

PWY-6277: superpathway of 5-aminoimidazole ribonucleotide biosynthesis

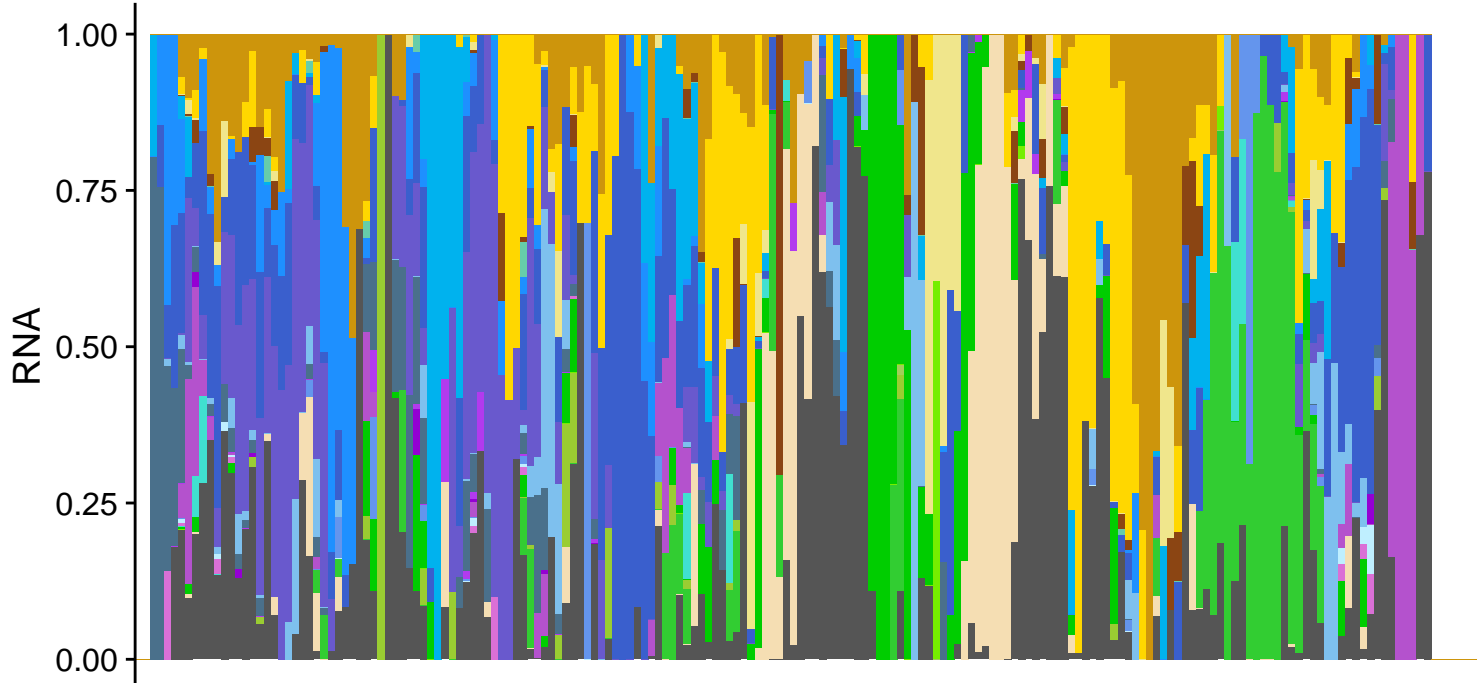

Person-week pair (RNA>0 n = 180)

Bug

- Alistipes putredinis*
- Alistipes onderdonkii*
- Alistipes finegoldii*
- Odoribacter splanchnicus*
- Coprococcus comes*
- Eubacterium siraeum*
- Eubacterium eligens*
- Faecalibacterium prausnitzii*
- Roseburia intestinalis*
- Roseburia hominis*
- Streptococcus salivarius*
- Anaerostipes hadrus*
- Lachnospiraceae bacterium 5\_1\_63FAA*
- Phascolarctobacterium succinatutens*
- Rothia mucilaginosa*
- Akkermansia muciniphila*
- Escherichia coli*
- Klebsiella pneumoniae*
- Haemophilus parainfluenzae*
- Bilophila wadsworthia*
- Sutterella wadsworthensis*
- Methanobrevibacter smithii*
- other

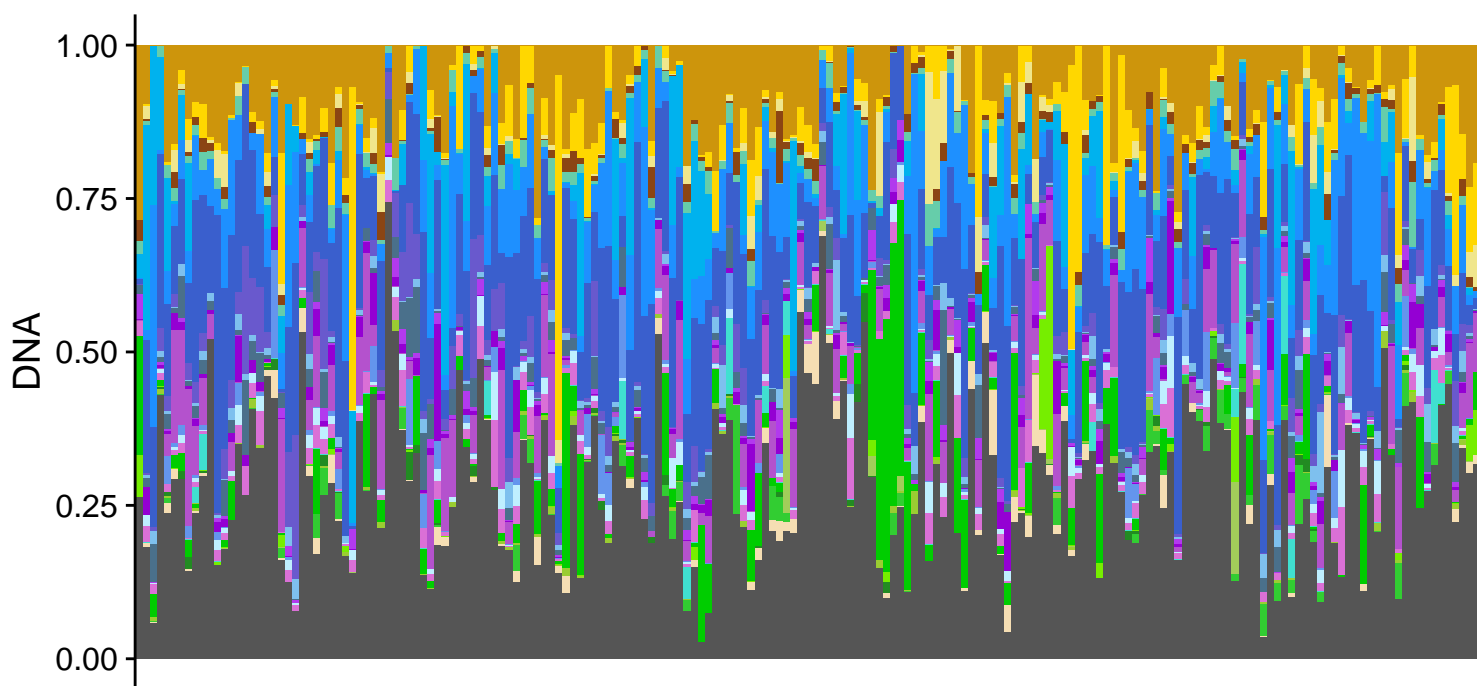

Person-week pair (DNA>0 n = 189)

# VALSYN-PWY: L-valine biosynthesis

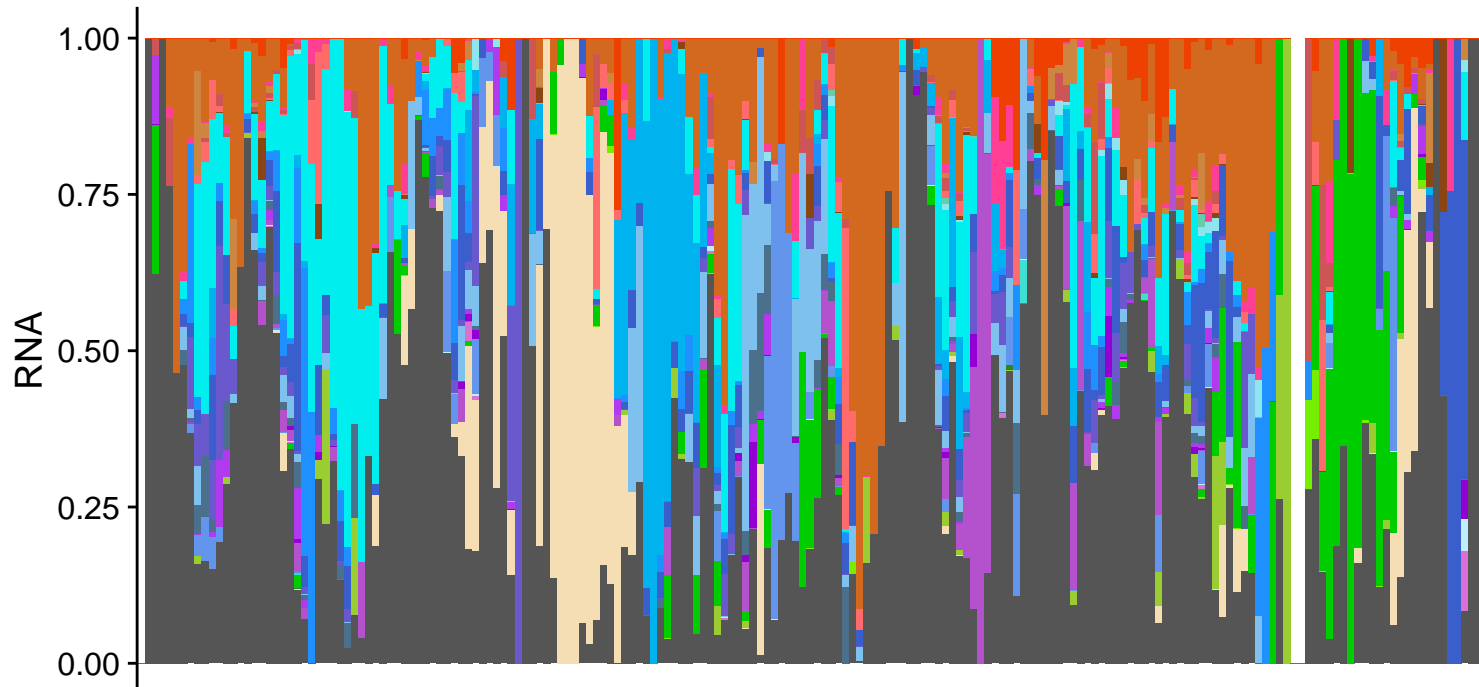

Person-week pair (RNA>0 n = 186)

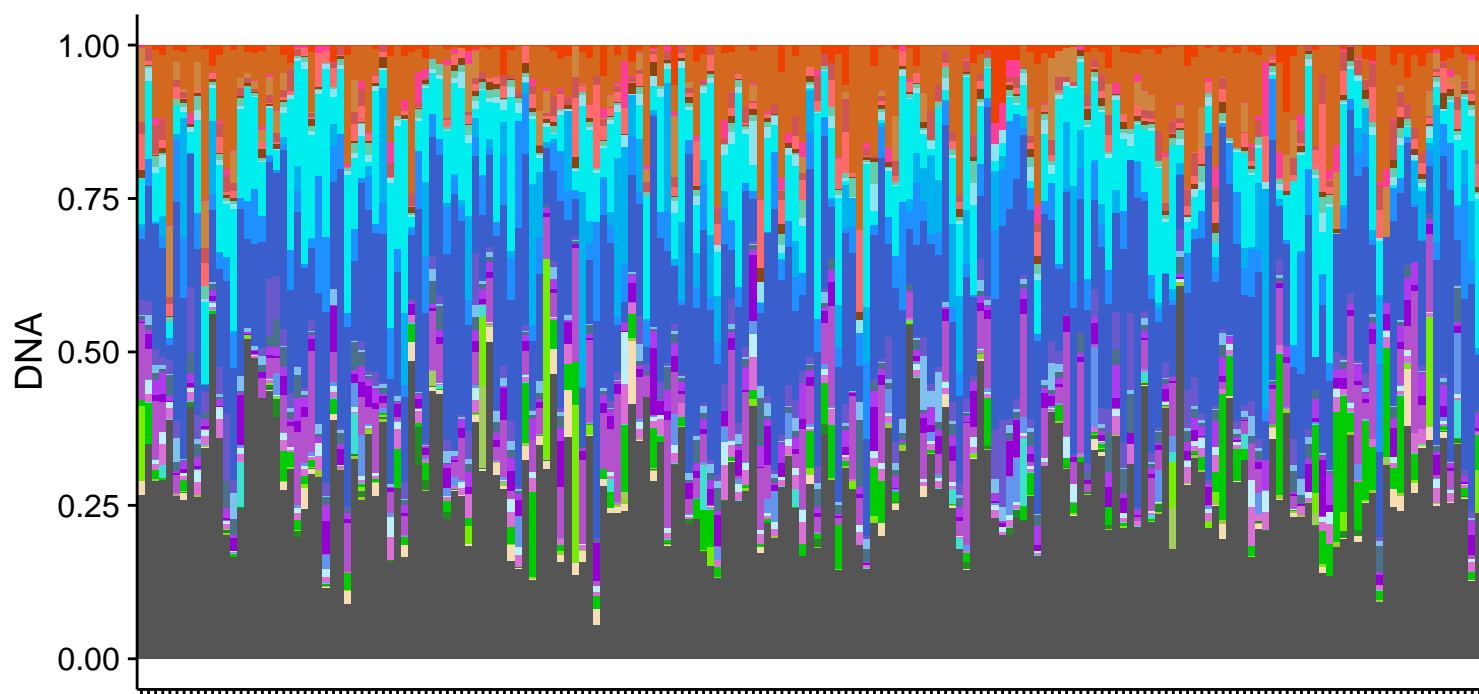

Person-week pair (DNA>0 n = 189)

## Bug

- *Bacteroides caccae*
- *Bacteroides vulgatus*
- *Bacteroides xylanisolvens*
- *Bacteroides massiliensis*
- *Parabacteroides merdae*
- *Parabacteroides distasonis*
- *Odoribacter splanchnicus*
- *Coprococcus comes*
- *Eubacterium hallii*
- *Eubacterium rectale*
- *Eubacterium siraeum*
- *Eubacterium eligens*
- *Faecalibacterium prausnitzii*
- *Roseburia intestinalis*
- *Roseburia hominis*
- *Roseburia inulinivorans*
- *Ruminococcus torques*
- *Ruminococcus obeum*
- *Ruminococcus bromii*
- *Streptococcus salivarius*
- *Anaerostipes hadrus*
- *Lachnospiraceae bacterium 5 1 63FAA*
- *Phascolarctobacterium succinatutens*
- *Akkermansia muciniphila*
- *Escherichia coli*
- *Klebsiella pneumoniae*
- *Haemophilus parainfluenzae*
- *Bilophila wadsworthia*
- *Methanobrevibacter smithii*
- other

# PWY-5667: CDP-diacylglycerol biosynthesis I

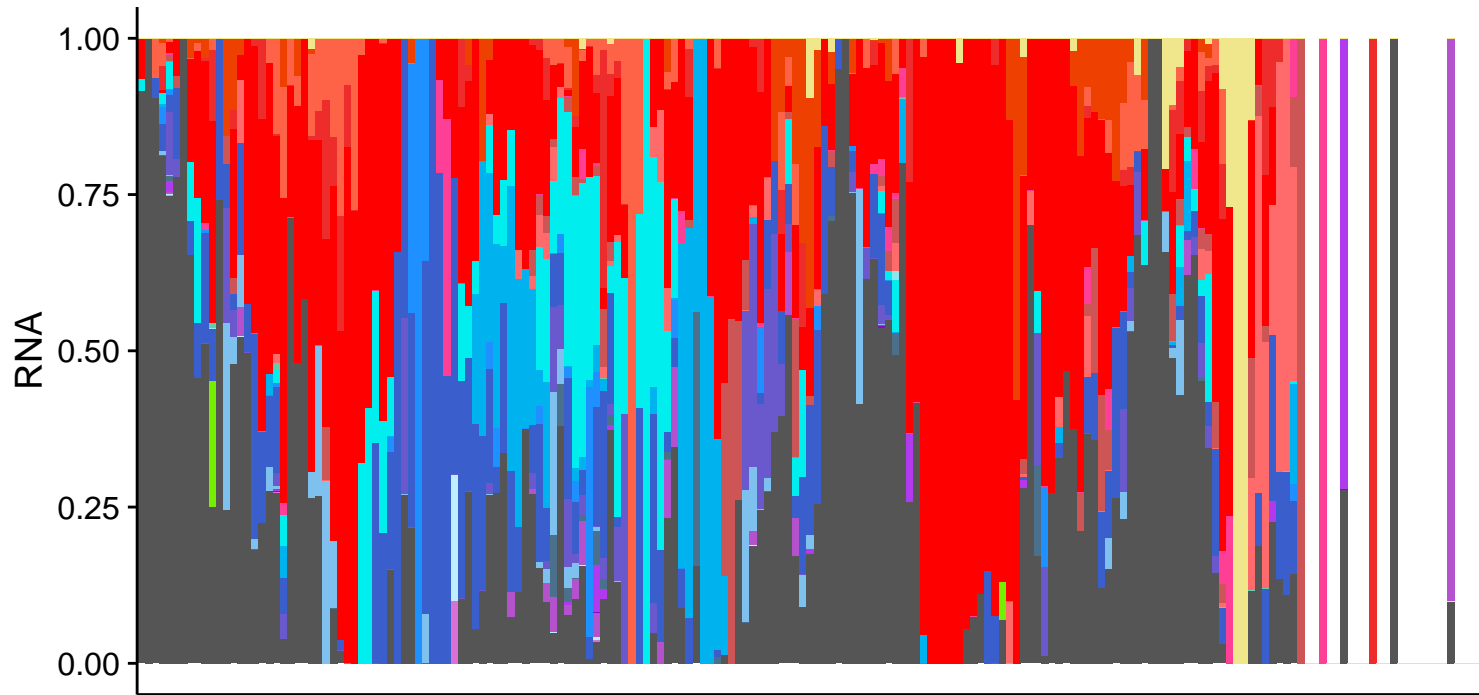

Person-week pair (RNA>0 n = 169)

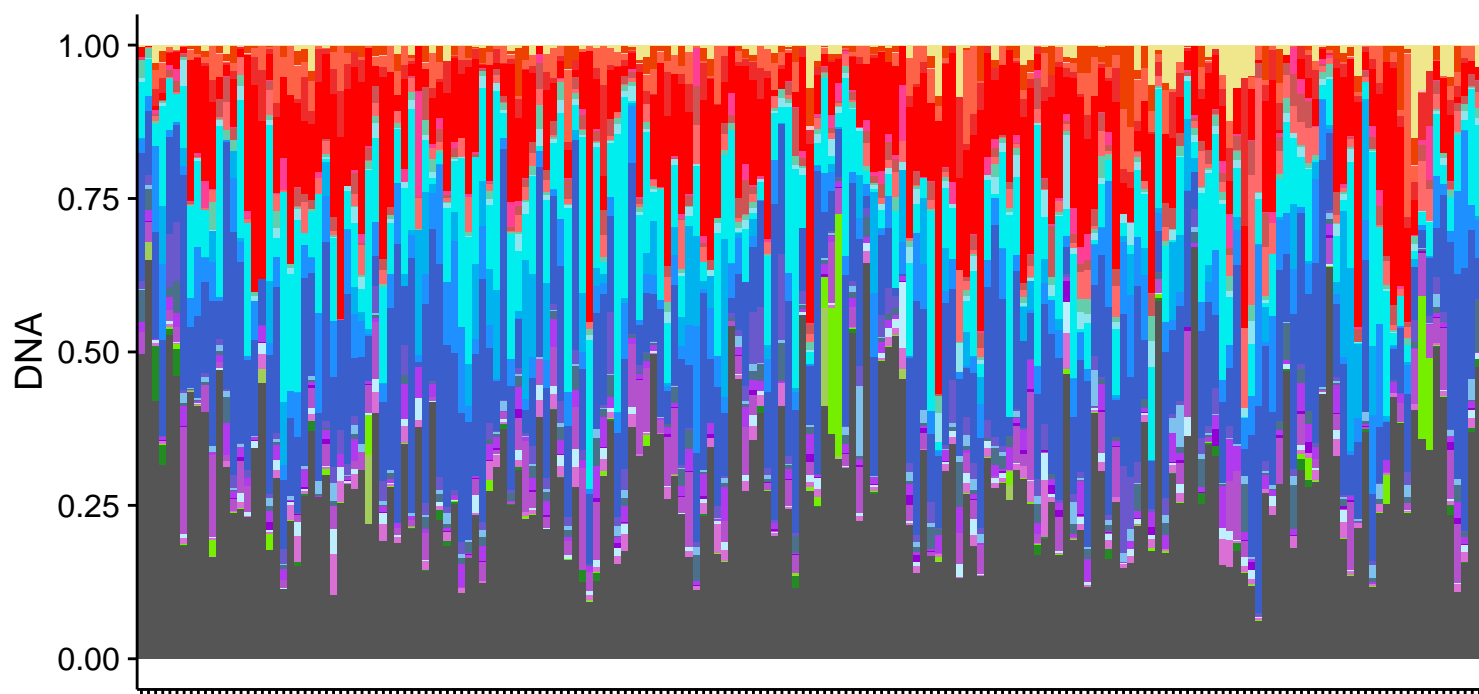

Person-week pair (DNA>0 n = 189)

## Bug

- Alistipes finegoldii*
- Bacteroides caccae*
- Bacteroides fragilis*
- Bacteroides ovatus*
- Bacteroides thetaiotaomicron*
- Bacteroides uniformis*
- Bacteroides xylanisolvens*
- Parabacteroides merdae*
- Parabacteroides distasonis*
- Coprococcus comes*
- Eubacterium hallii*
- Eubacterium rectale*
- Eubacterium siraeum*
- Eubacterium eligens*
- Faecalibacterium prausnitzii*
- Roseburia intestinalis*
- Roseburia hominis*
- Roseburia inulinivorans*
- Ruminococcus torques*
- Ruminococcus obeum*
- Ruminococcus bromii*
- Anaerostipes hadrus*
- Lachnospiraceae bacterium 5 1 63FAA*
- Escherichia coli*
- Klebsiella pneumoniae*
- Haemophilus parainfluenzae*
- other*

# PWY0-1319: CDP-diacylglycerol biosynthesis II



Person-week pair (RNA>0 n = 169)

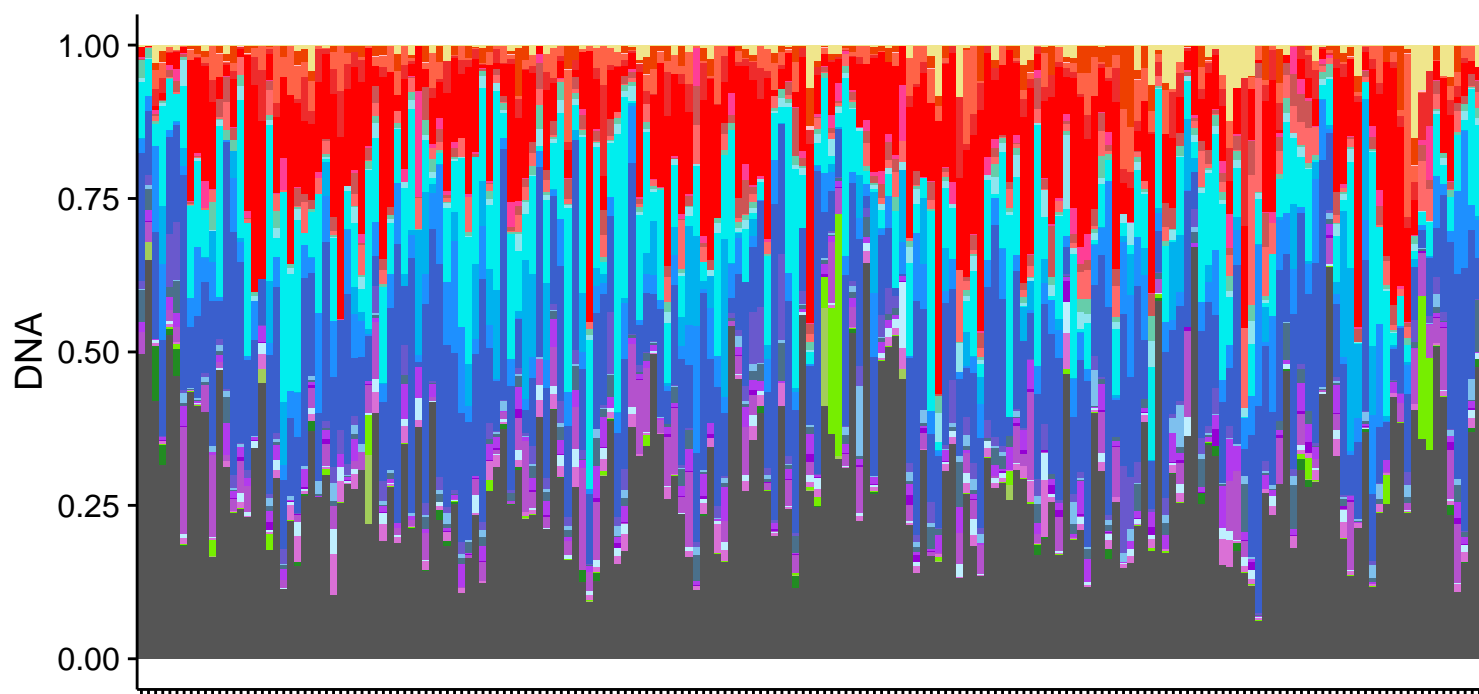

Person-week pair (DNA>0 n = 189)

## Bug

- Alistipes finegoldii*
- Bacteroides caccae*
- Bacteroides fragilis*
- Bacteroides ovatus*
- Bacteroides thetaiotaomicron*
- Bacteroides uniformis*
- Bacteroides xylanisolvens*
- Parabacteroides merdae*
- Parabacteroides distasonis*
- Coprococcus comes*
- Eubacterium hallii*
- Eubacterium rectale*
- Eubacterium siraeum*
- Eubacterium eligens*
- Faecalibacterium prausnitzii*
- Roseburia intestinalis*
- Roseburia hominis*
- Roseburia inulinivorans*
- Ruminococcus torques*
- Ruminococcus obeum*
- Ruminococcus bromii*
- Anaerostipes hadrus*
- Lachnospiraceae bacterium 5 1 63FAA*
- Escherichia coli*
- Klebsiella pneumoniae*
- Haemophilus parainfluenzae*
- other*

# SALVADEHYPOX-PWY: adenosine nucleotides degradation II

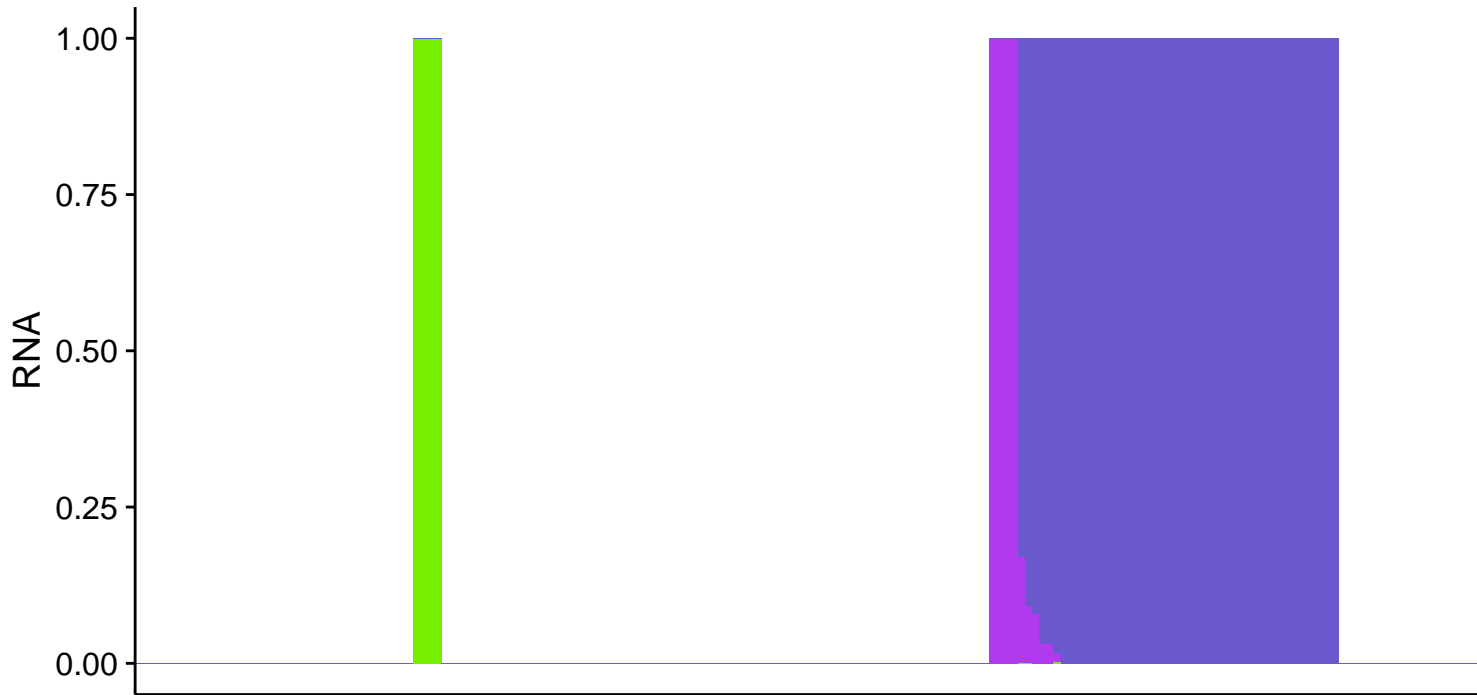

Bug

- *Roseburia intestinalis*
- *Ruminococcus torques*
- *Escherichia coli*
- other

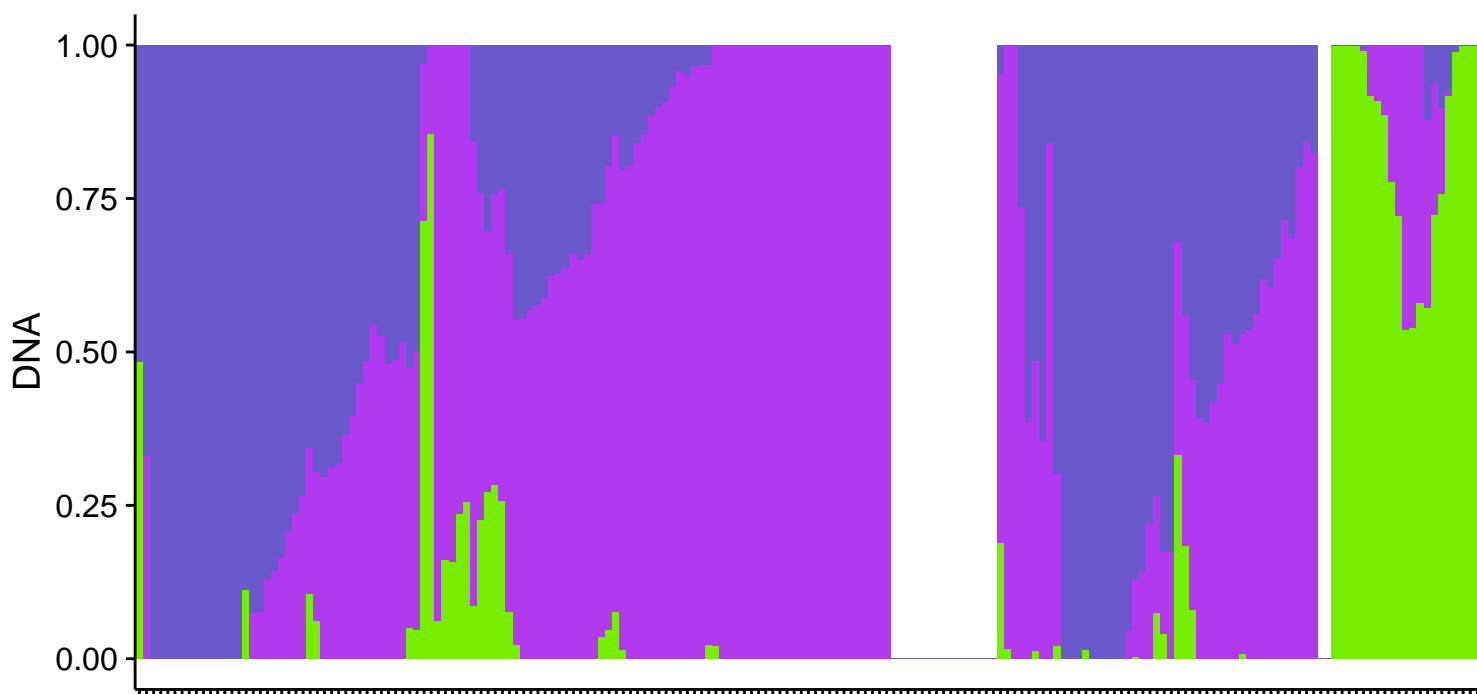



# PWY-7111: pyruvate fermentation to isobutanol (engineered)

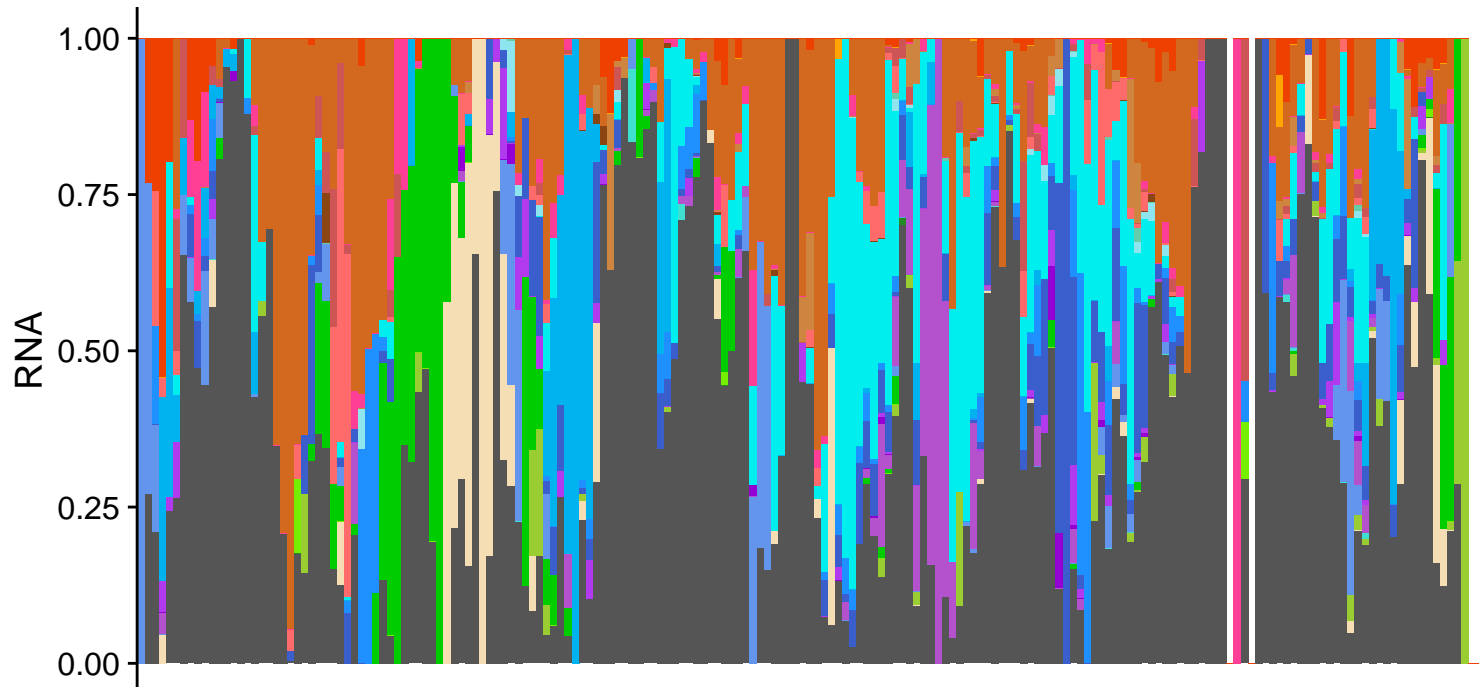

Person-week pair (RNA>0 n = 185)

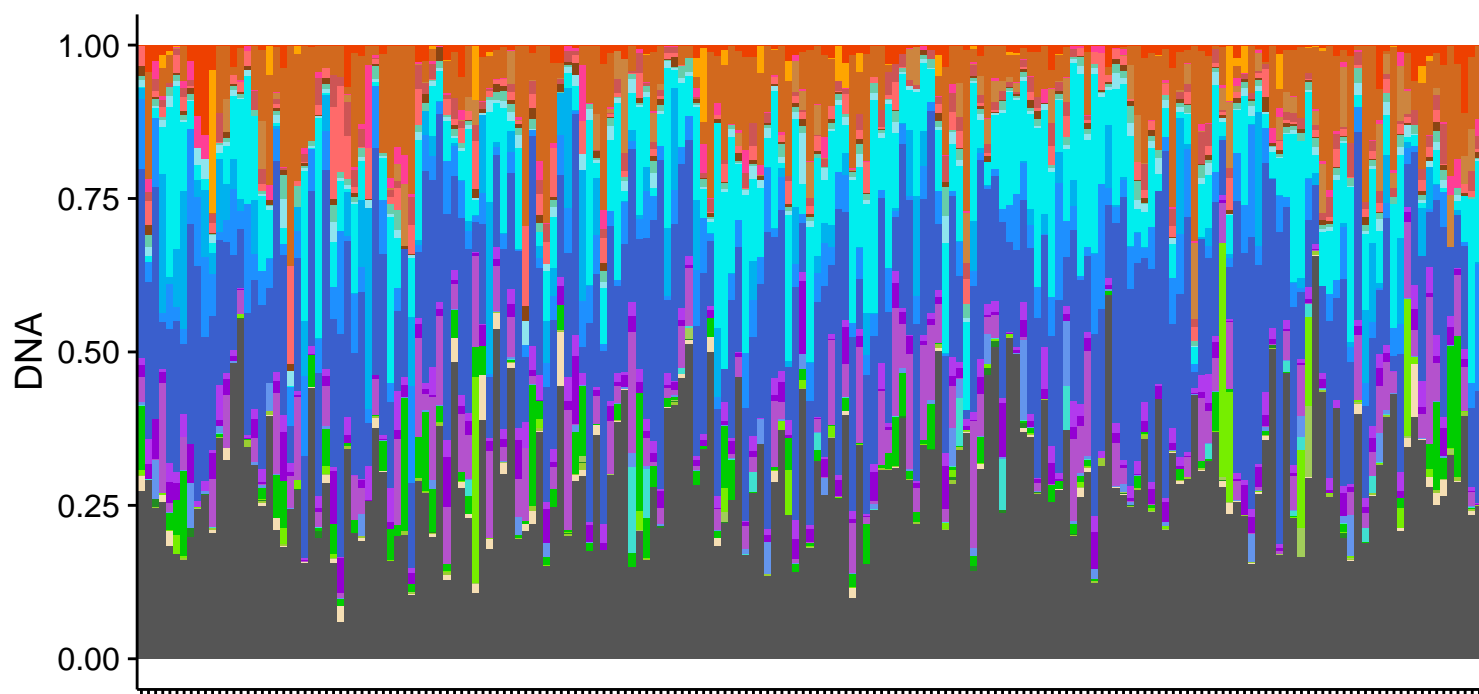

Person-week pair (DNA>0 n = 189)

## Bug

- Bacteroides caccae*
- Bacteroides dorei*
- Bacteroides vulgatus*
- Bacteroides xyloxylophilus*
- Bacteroides massiliensis*
- Parabacteroides merdae*
- Parabacteroides distasonis*
- Odoribacter splanchnicus*
- Coprococcus comes*
- Eubacterium hallii*
- Eubacterium rectale*
- Eubacterium siraeum*
- Eubacterium eligens*
- Faecalibacterium prausnitzii*
- Ruminococcus torques*
- Ruminococcus obeum*
- Ruminococcus bromii*
- Streptococcus salivarius*
- Phascolarctobacterium succinatutens*
- Akkermansia muciniphila*
- Escherichia coli*
- Klebsiella pneumoniae*
- Haemophilus parainfluenzae*
- Bilophila wadsworthia*
- Methanobrevibacter smithii*
- other

# DTDPRHAMSYN-PWY: dTDP-L-rhamnose biosynthesis I

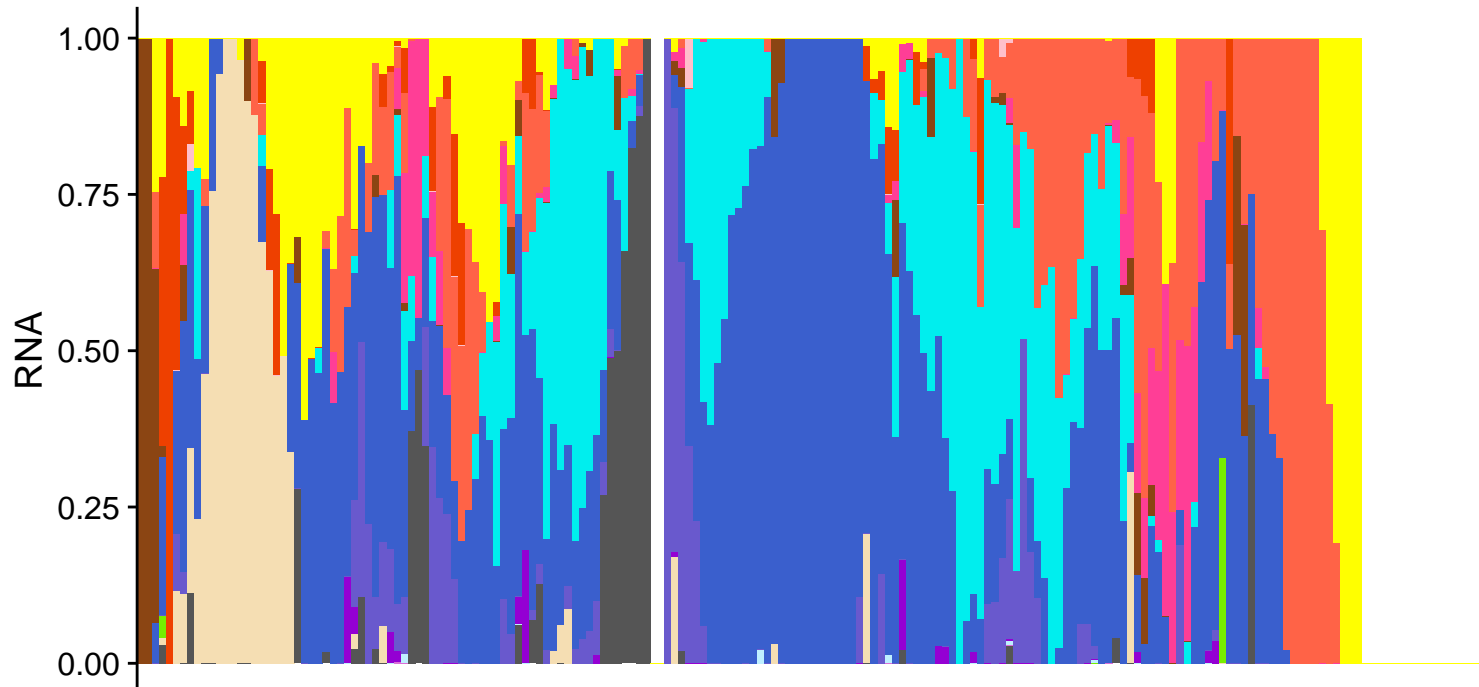

Person-week pair (RNA>0 n = 170)

## Bug

- Alistipes shahii*
- Bacteroides caccae*
- Bacteroides fragilis*
- Bacteroides ovatus*
- Bacteroides xylanisolvens*
- Odoribacter splanchnicus*
- Eubacterium rectale*
- Faecalibacterium prausnitzii*
- Roseburia intestinalis*
- Ruminococcus torques*
- Ruminococcus obeum*
- Anaerostipes hadrus*
- Lachnospiraceae bacterium 5 1 63FAA*
- Escherichia coli*
- Methanobrevibacter smithii*
- other*

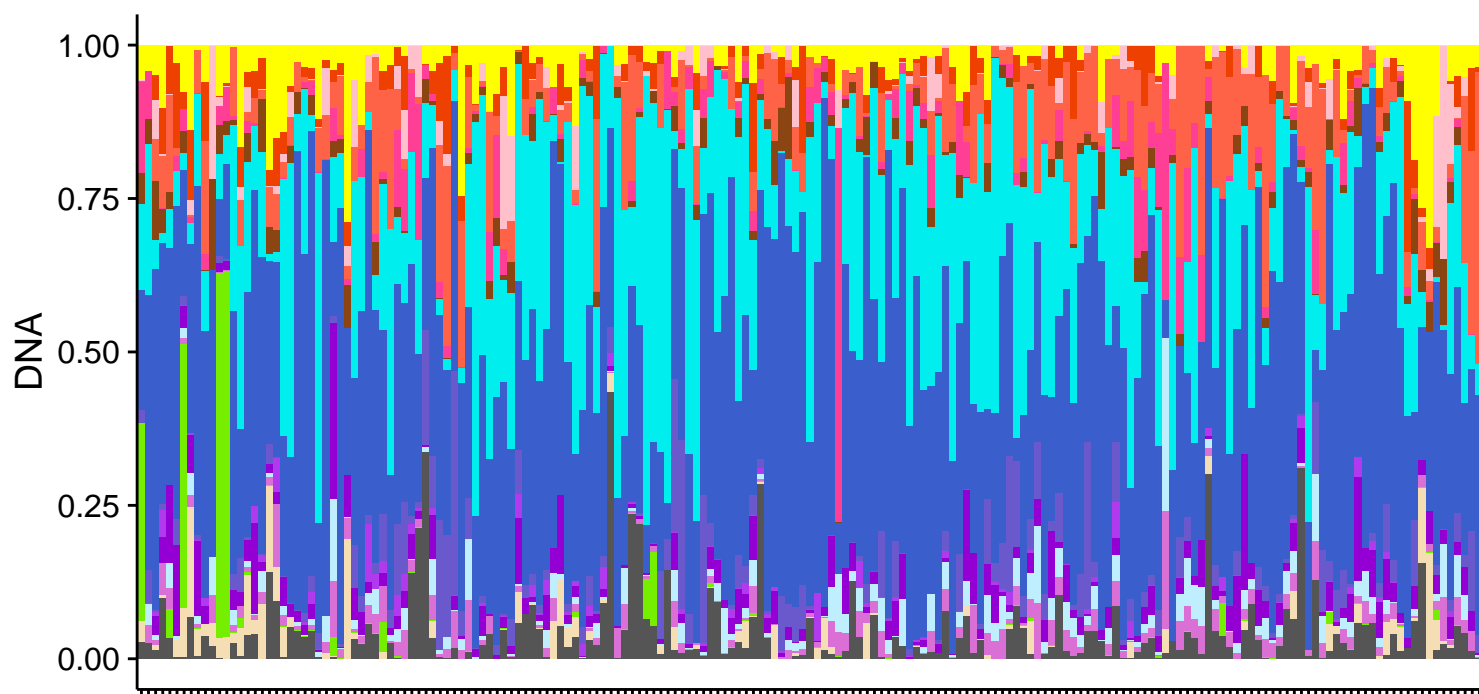

Person-week pair (DNA>0 n = 189)

# PWY-5097: L-lysine biosynthesis VI

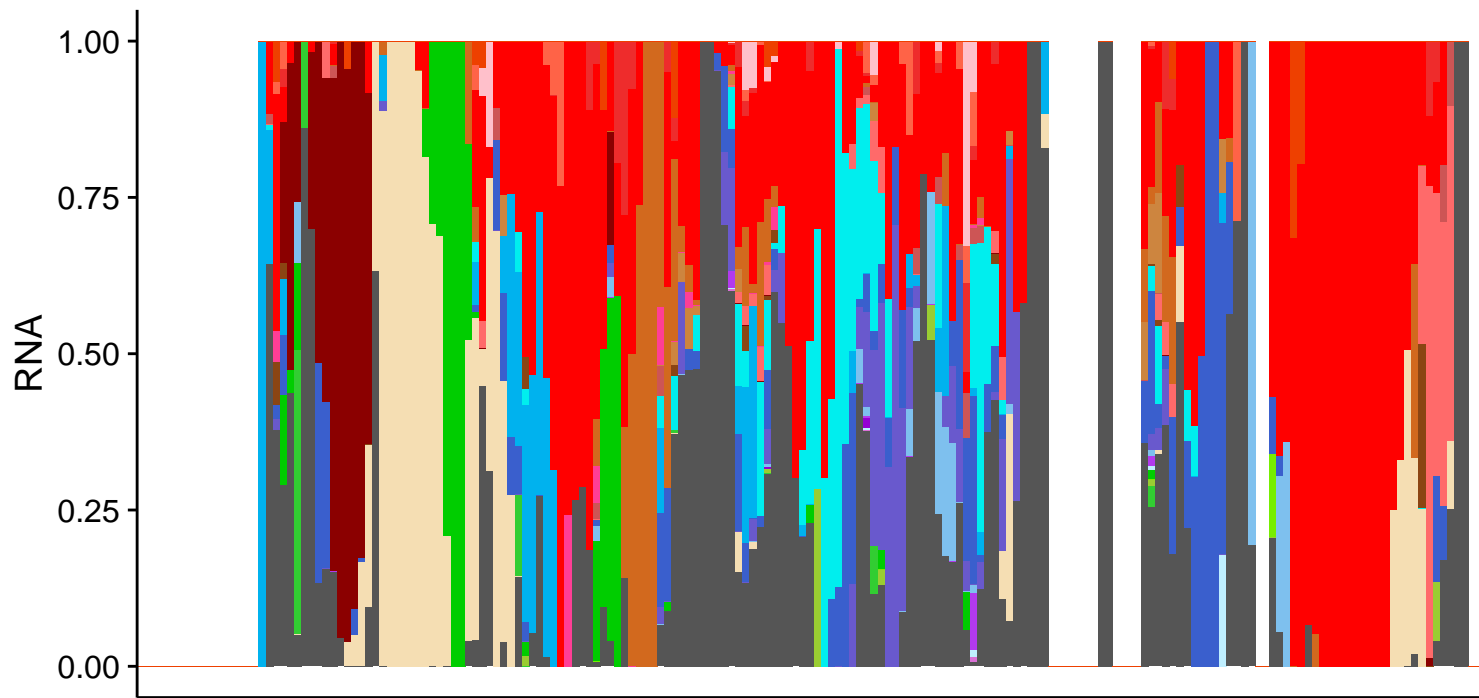

Person-week pair (RNA>0 n = 157)

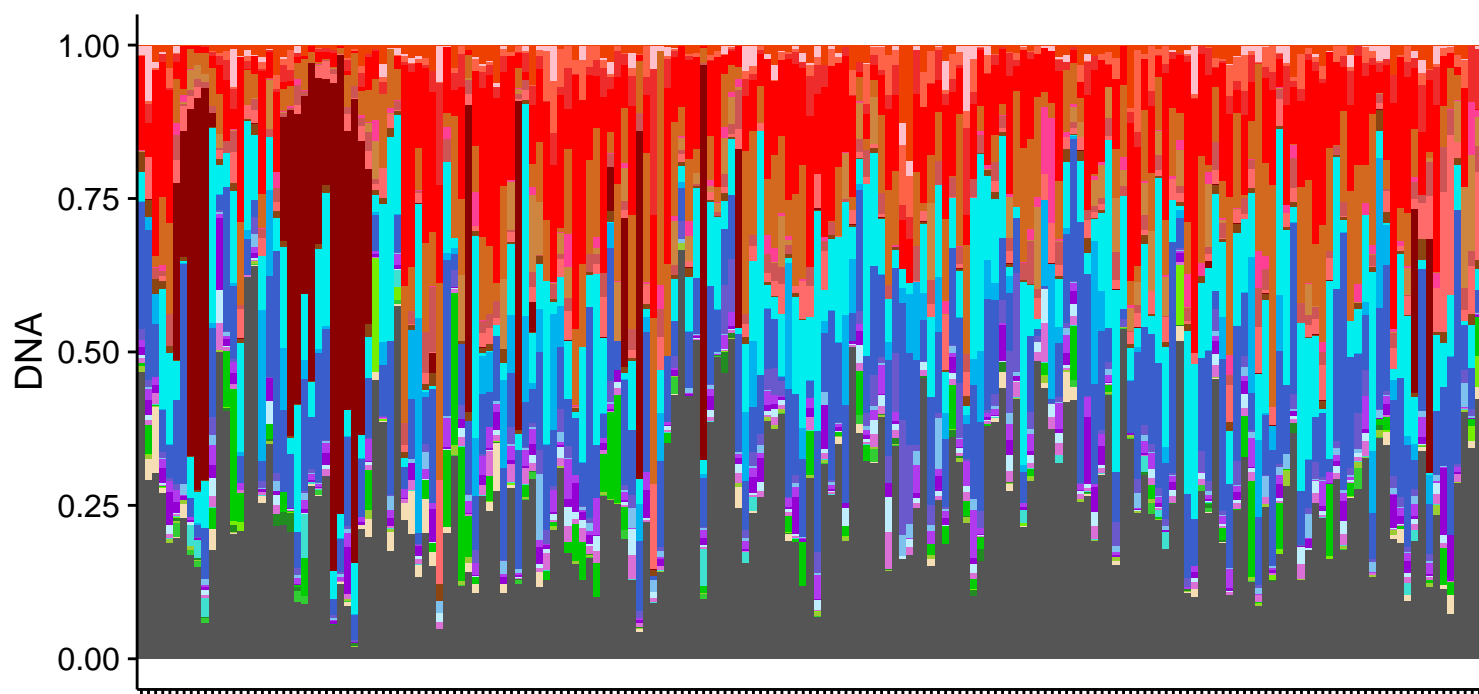

Person-week pair (DNA>0 n = 189)

## Bug

- *Bacteroides caccae*
- *Bacteroides fragilis*
- *Bacteroides ovatus*
- *Bacteroides thetaiotaomicron*
- *Bacteroides uniformis*
- *Bacteroides vulgatus*
- *Bacteroides xylanisolvens*
- *Bacteroides massiliensis*
- *Parabacteroides merdae*
- *Parabacteroides distasonis*
- *Prevotella copri*
- *Odoribacter splanchnicus*
- *Eubacterium rectale*
- *Eubacterium siraeum*
- *Faecalibacterium prausnitzii*
- *Roseburia intestinalis*
- *Roseburia hominis*
- *Ruminococcus torques*
- *Ruminococcus obeum*
- *Anaerostipes hadrus*
- *Lachnospiraceae bacterium 5 1 63FAA*
- *Phascolarctobacterium succinatutens*
- *Akkermansia muciniphila*
- *Escherichia coli*
- *Haemophilus parainfluenzae*
- *Bilophila wadsworthia*
- *Sutterella wadsworthensis*
- *Methanobrevibacter smithii*
- *other*

# PWY-5104: L-isoleucine biosynthesis IV

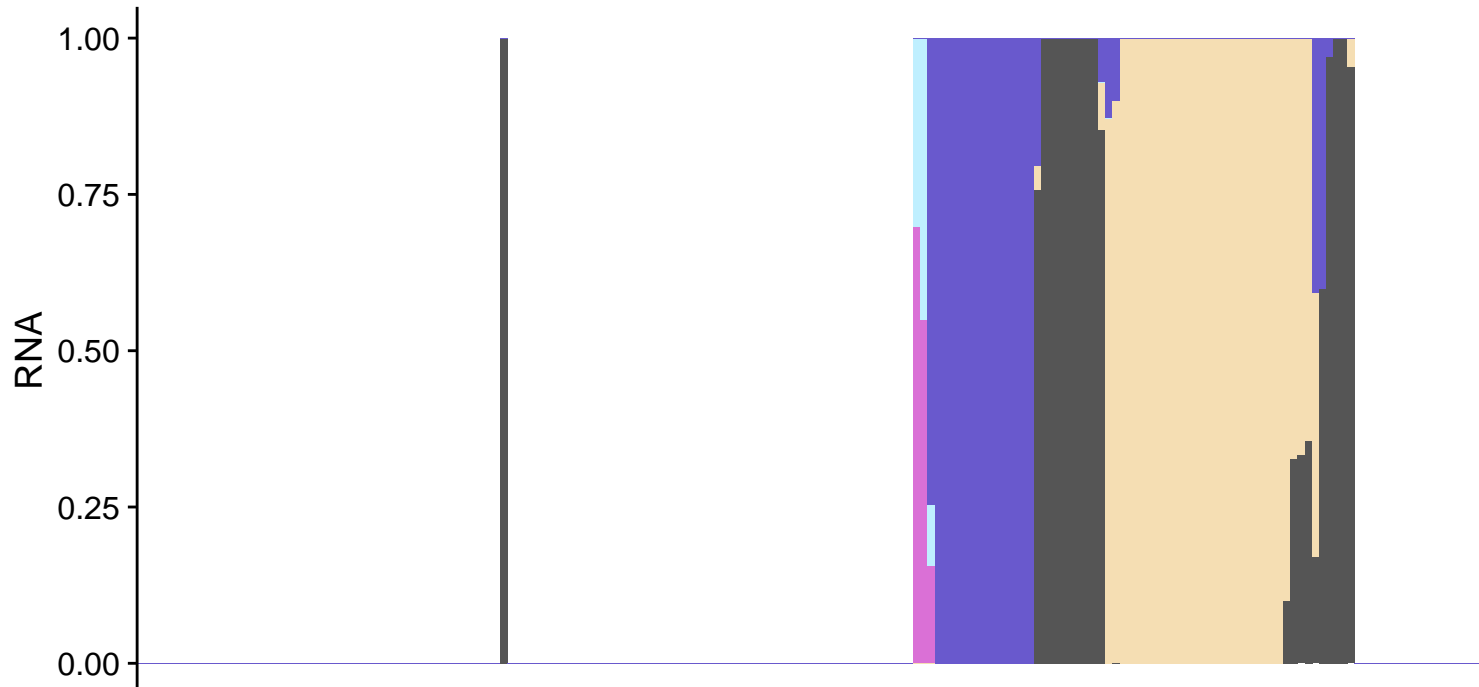

Person-week pair (RNA>0 n = 63)

Bug

*Roseburia intestinalis*

*Anaerostipes hadrus*

*Lachnospiraceae bacterium 5\_1\_63FAA*

*Methanobrevibacter smithii*

other

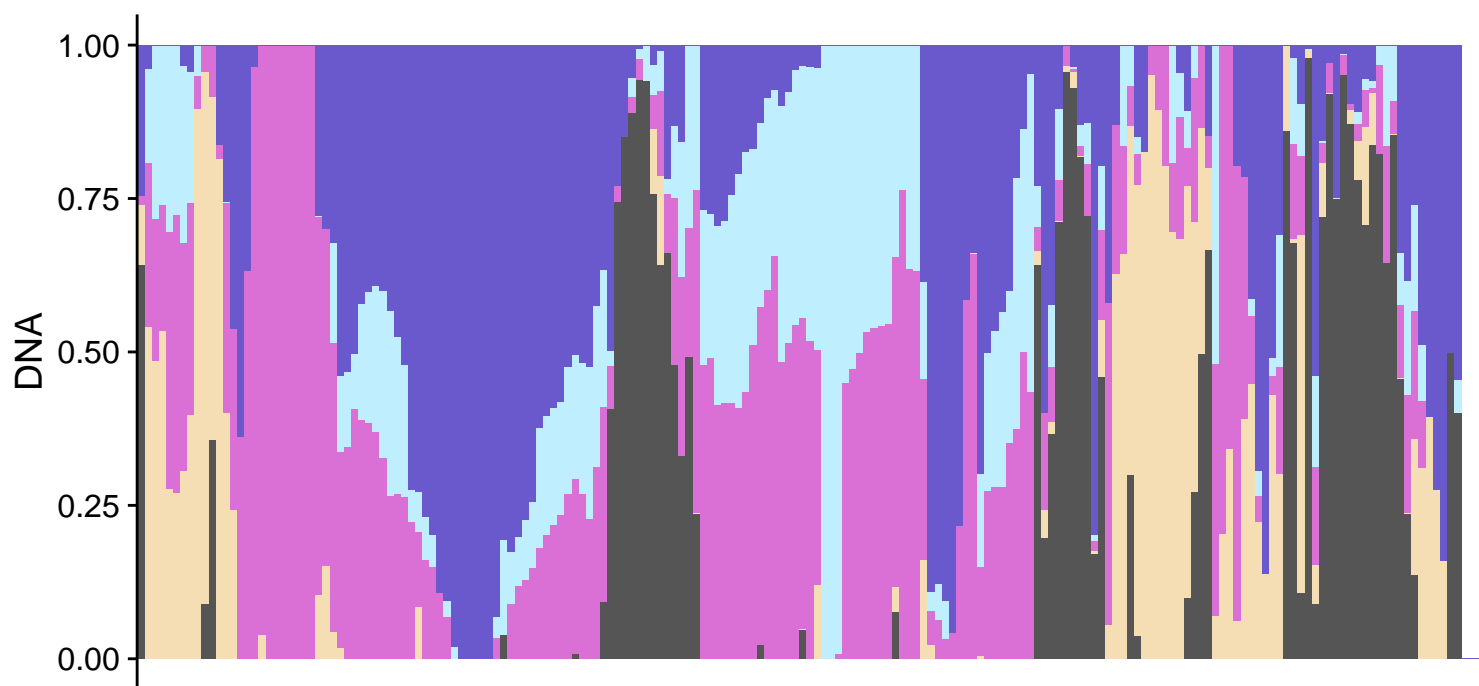

Person-week pair (DNA>0 n = 186)

# PWY-7323: superpathway of GDP-mannose-derived O-antigen building blocks biosynthesis

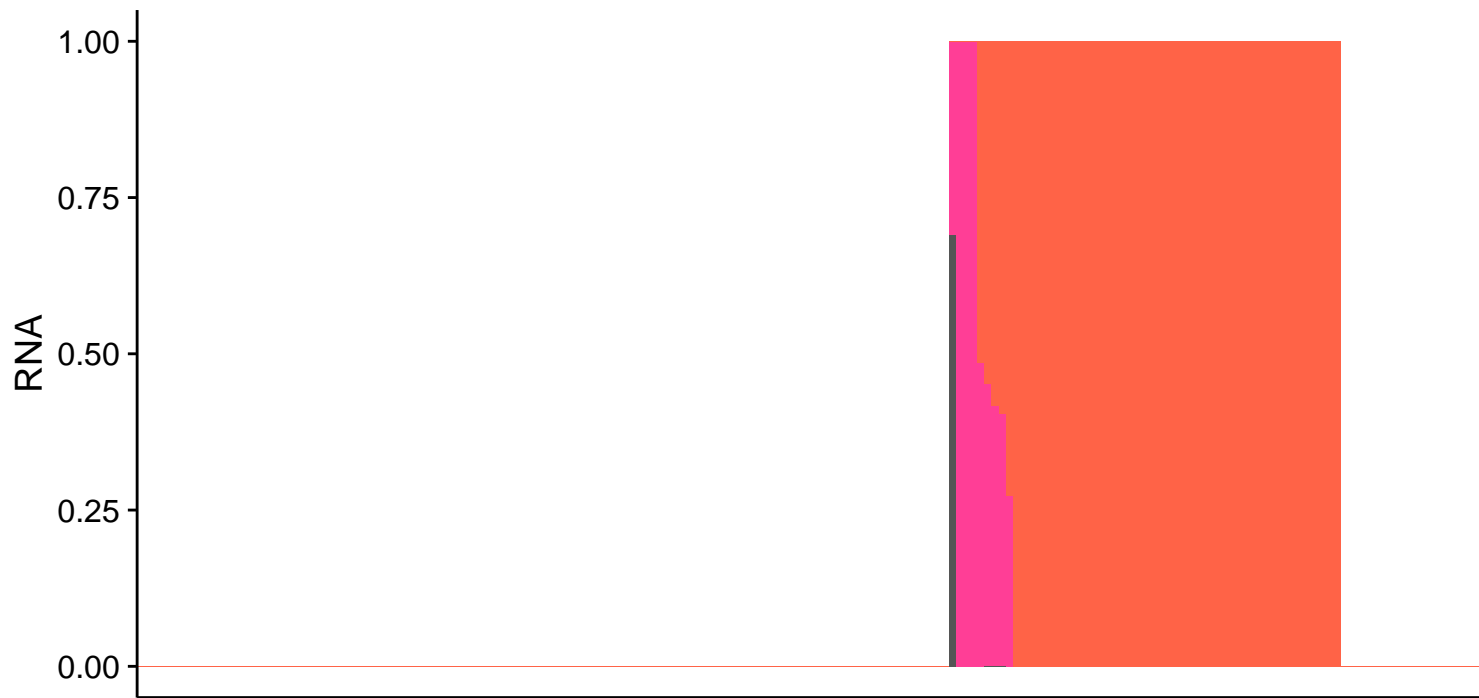

Person-week pair (RNA>0 n = 55)

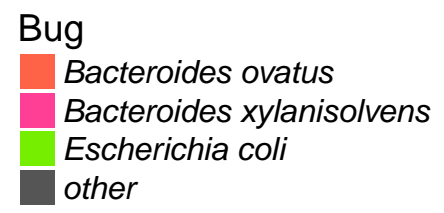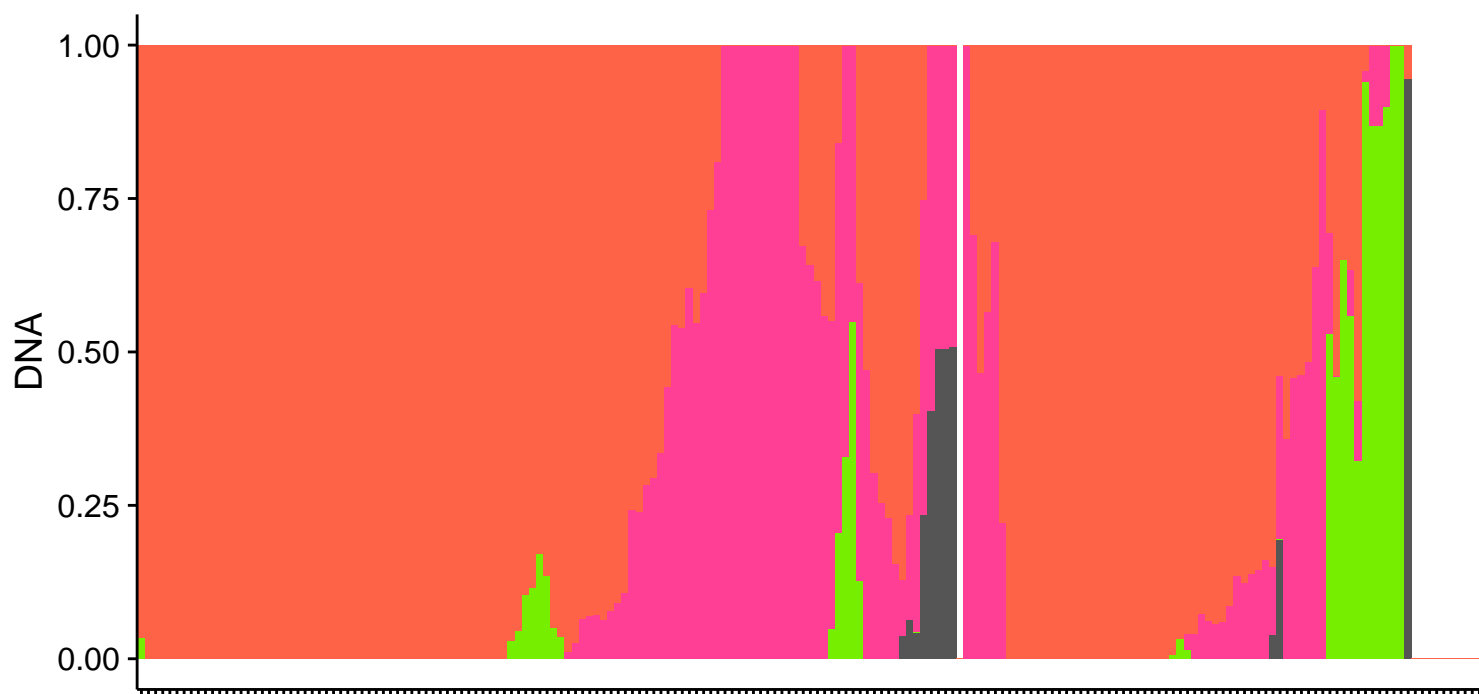

Person-week pair (DNA>0 n = 178)

# PWY-6151: S-adenosyl-L-methionine cycle I

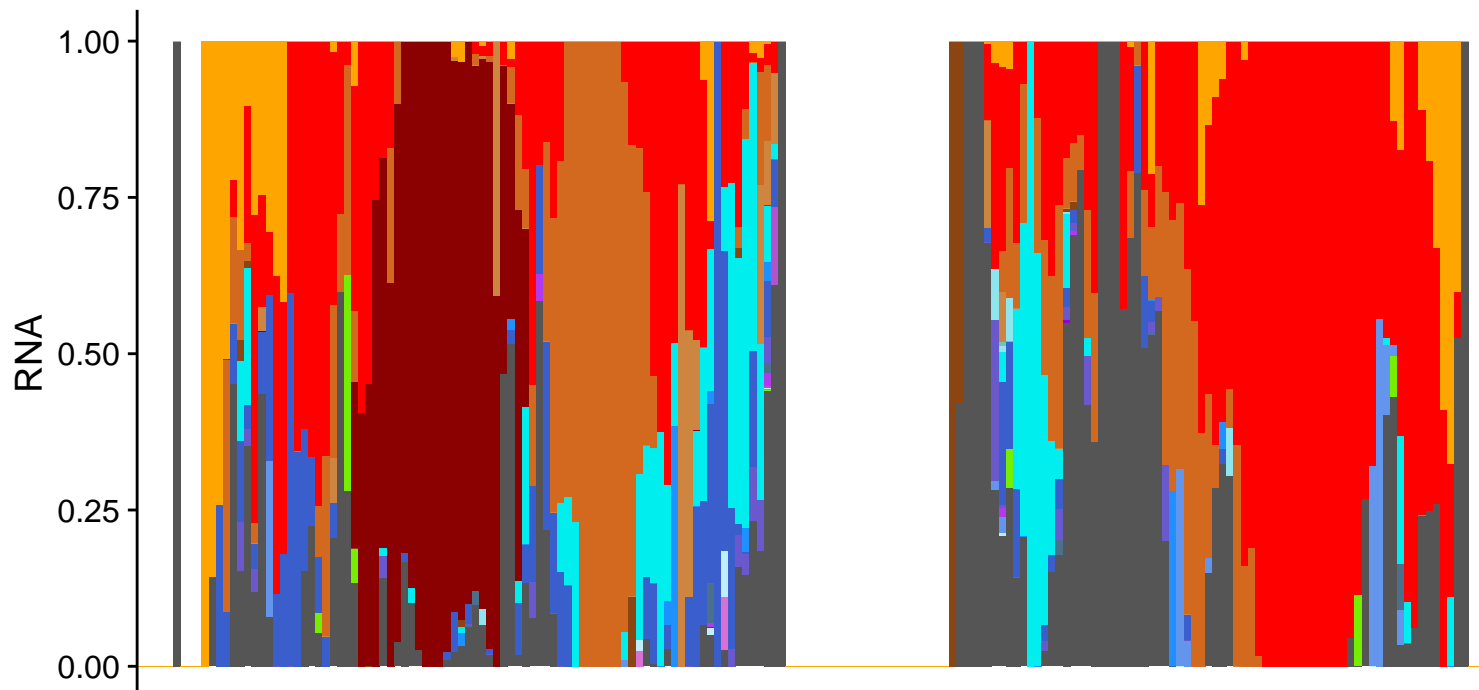

Person-week pair (RNA>0 n = 156)

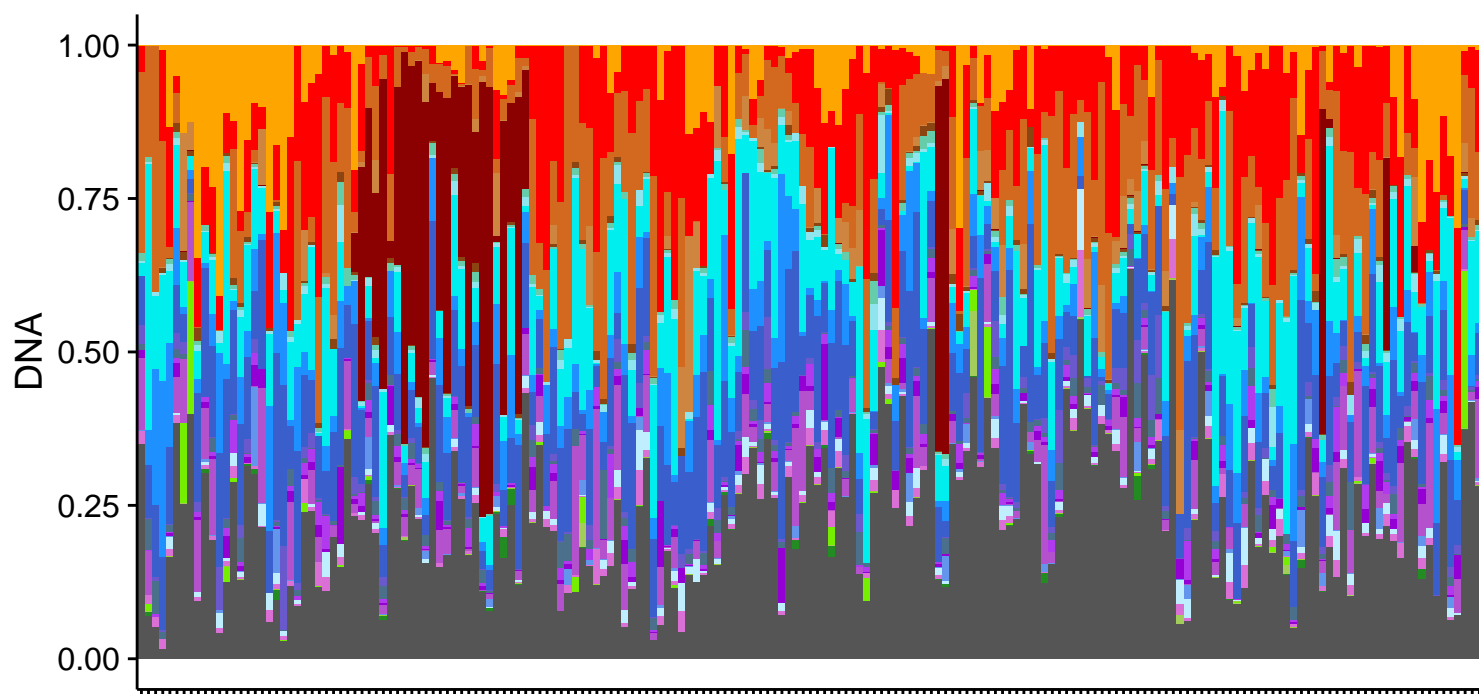

Person-week pair (DNA>0 n = 189)

## Bug

- *Bacteroides dorei*
- *Bacteroides uniformis*
- *Bacteroides vulgatus*
- *Bacteroides massiliensis*
- *Prevotella copri*
- *Odoribacter splanchnicus*
- *Coprococcus comes*
- *Eubacterium hallii*
- *Eubacterium rectale*
- *Eubacterium eligens*
- *Faecalibacterium prausnitzii*
- *Roseburia intestinalis*
- *Roseburia inulinivorans*
- *Ruminococcus torques*
- *Ruminococcus obeum*
- *Ruminococcus bromii*
- *Streptococcus salivarius*
- *Anaerostipes hadrus*
- *Lachnospiraceae bacterium 5 1 63FAA*
- *Rothia mucilaginosa*
- *Escherichia coli*
- *Klebsiella pneumoniae*
- *Haemophilus parainfluenzae*
- *other*

# PWY-6124: inosine-5'-phosphate biosynthesis II

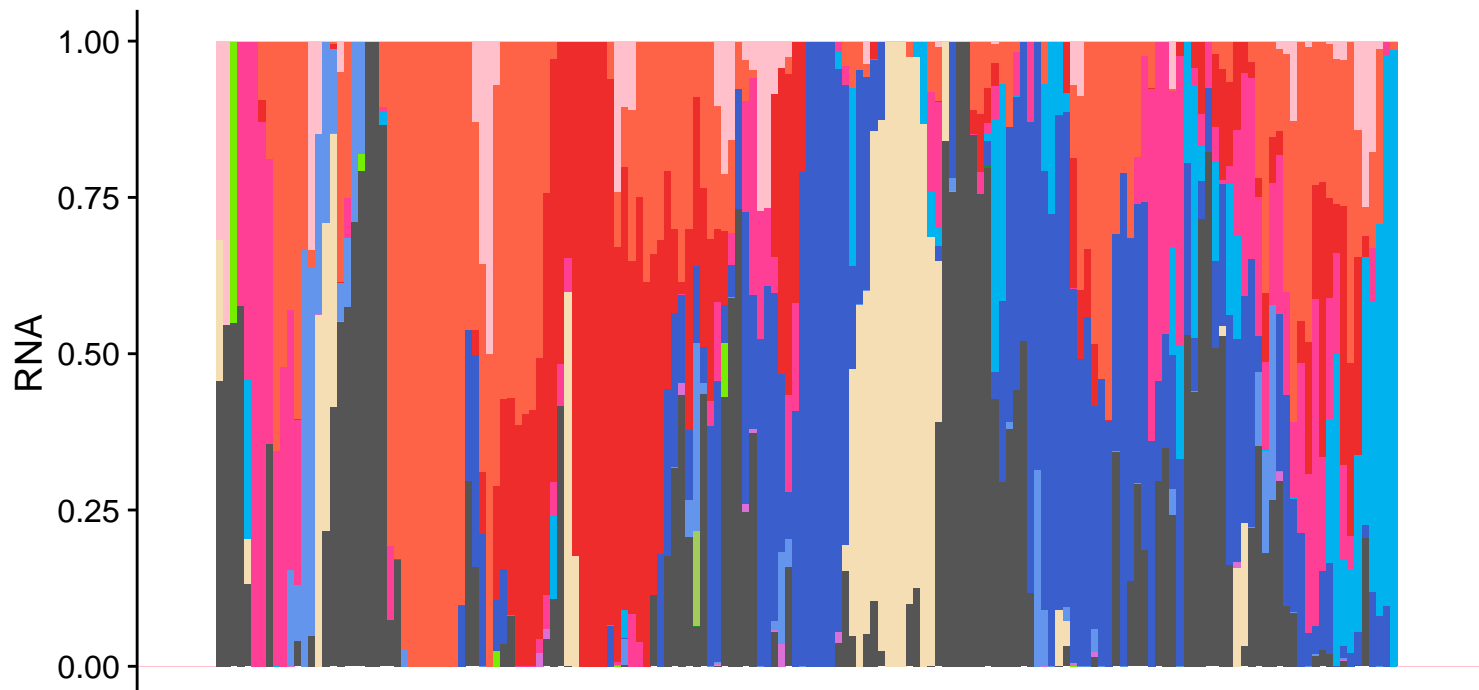

Person-week pair (RNA>0 n = 166)

## Bug

- Bacteroides fragilis*
- Bacteroides ovatus*
- Bacteroides thetaiotaomicron*
- Bacteroides xylanisolvens*
- Eubacterium siraeum*
- Faecalibacterium prausnitzii*
- Streptococcus salivarius*
- Lachnospiraceae bacterium 5\_1\_63FAA*
- Escherichia coli*
- Klebsiella pneumoniae*
- Haemophilus parainfluenzae*
- Methanobrevibacter smithii*
- other

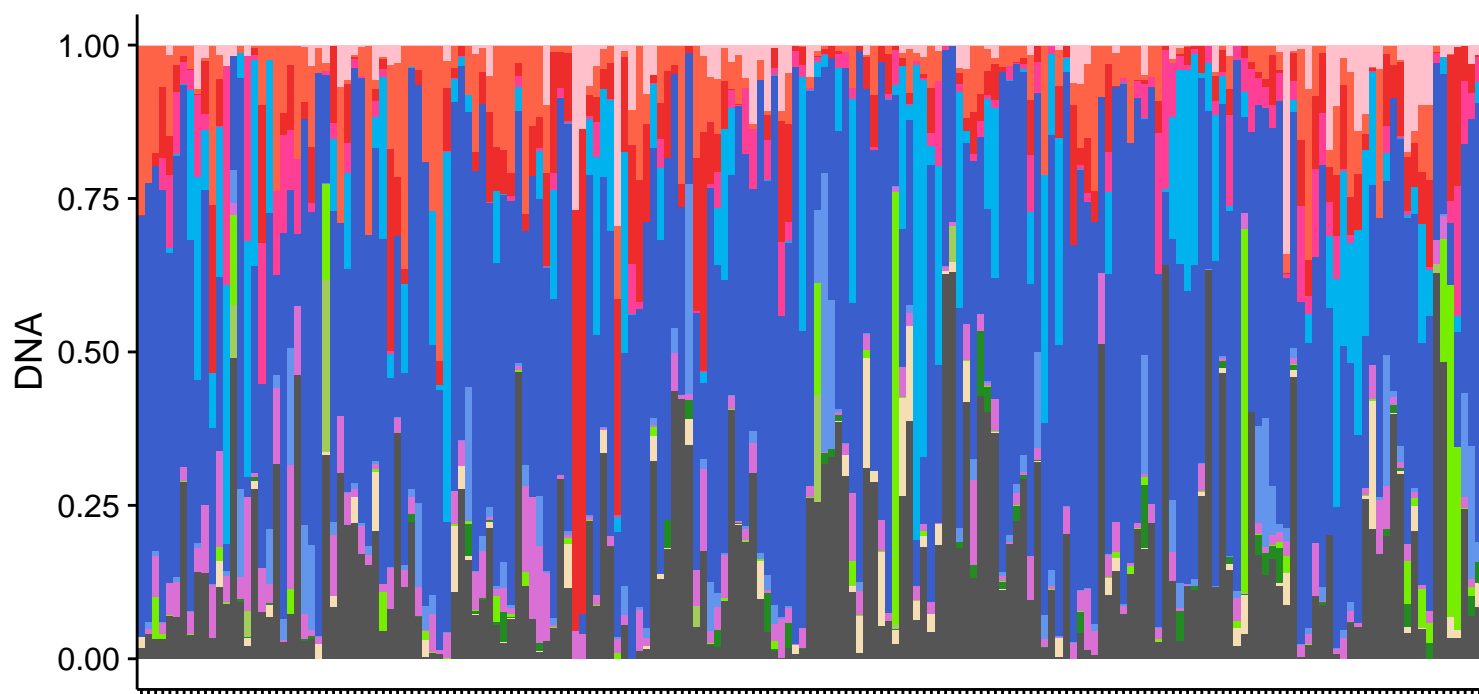

Person-week pair (DNA>0 n = 189)

# PWY-5100: pyruvate fermentation to acetate and lactate II

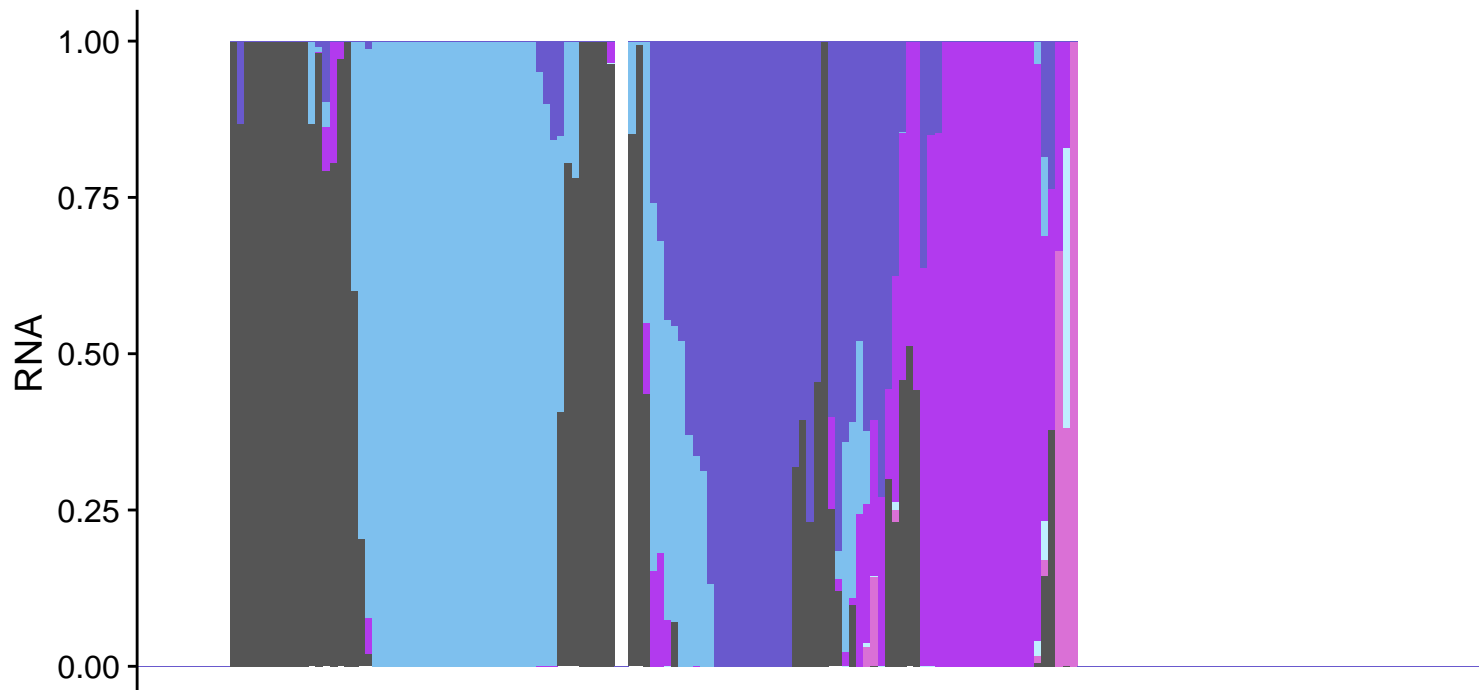

## Bug

- Roseburia intestinalis*
- Roseburia hominis*
- Ruminococcus torques*
- Anaerostipes hadrus*
- Lachnospiraceae bacterium 5\_1\_63FAA*
- Klebsiella pneumoniae*
- other

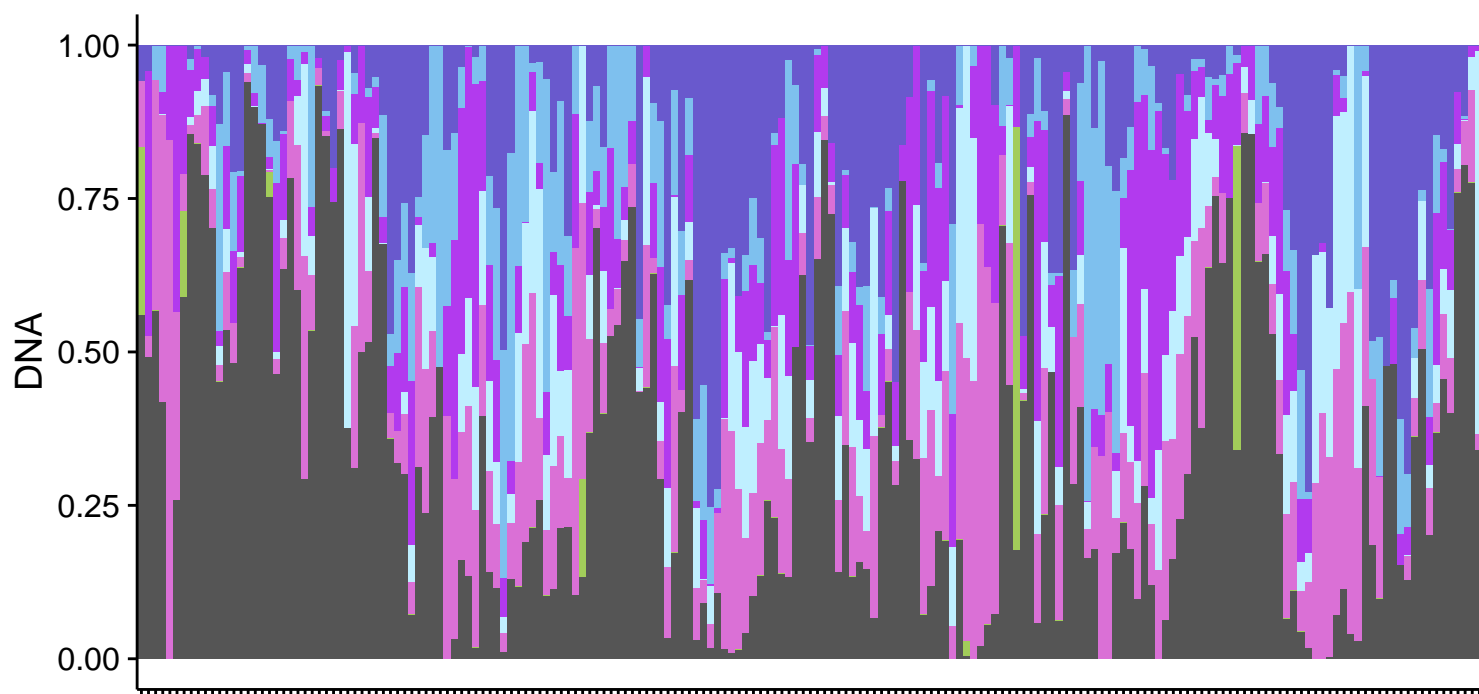



# PWY-5173: superpathway of acetyl-CoA biosynthesis

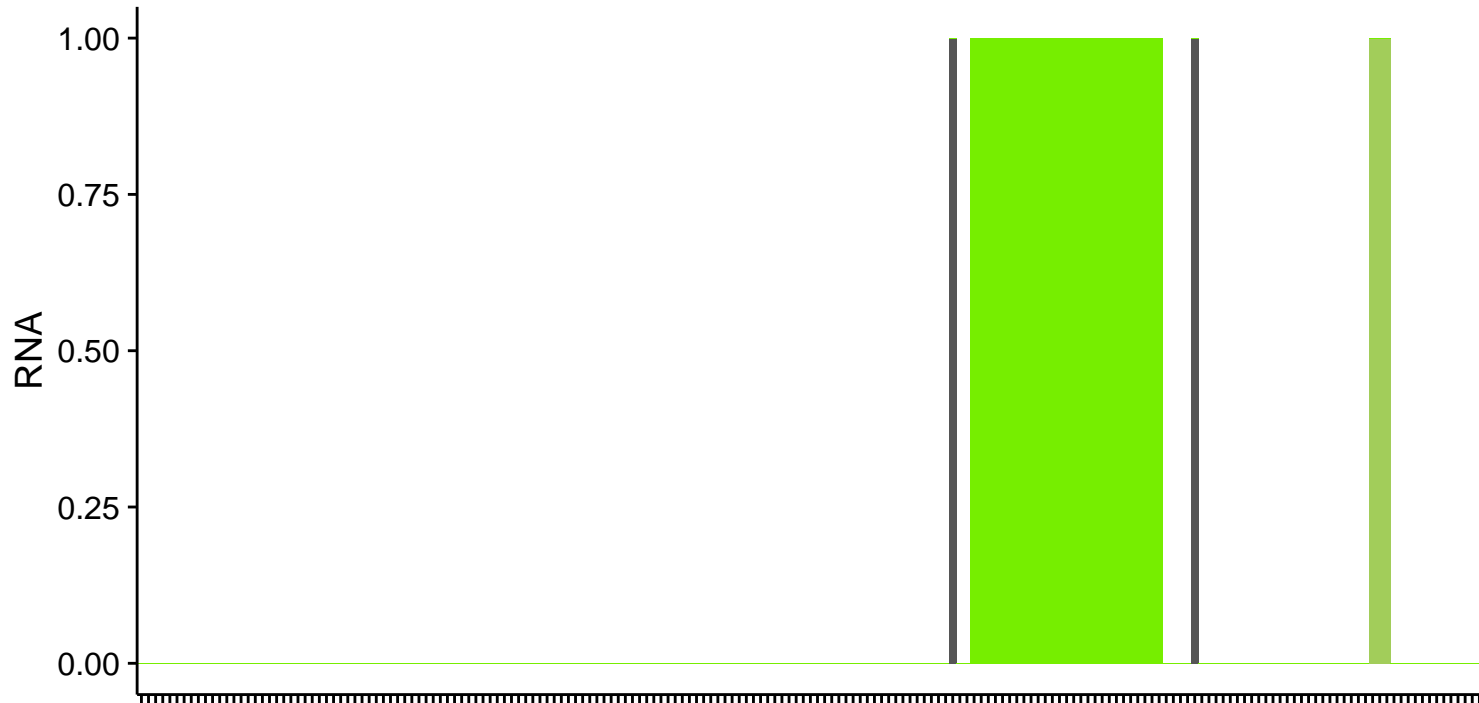

Person-week pair (RNA>0 n = 32)

Bug

- Escherichia coli*
- Klebsiella pneumoniae*
- other

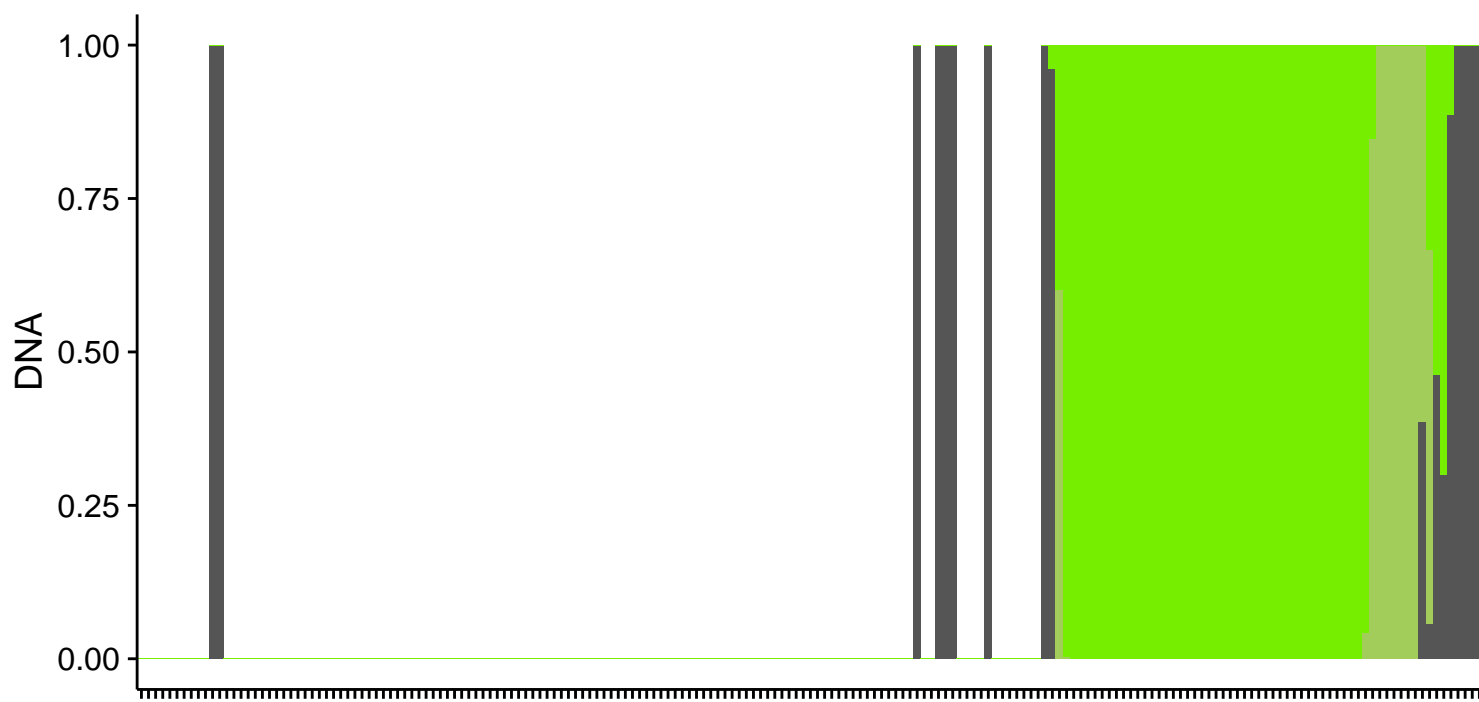

Person-week pair (DNA>0 n = 69)

# COA-PWY: coenzyme A biosynthesis I

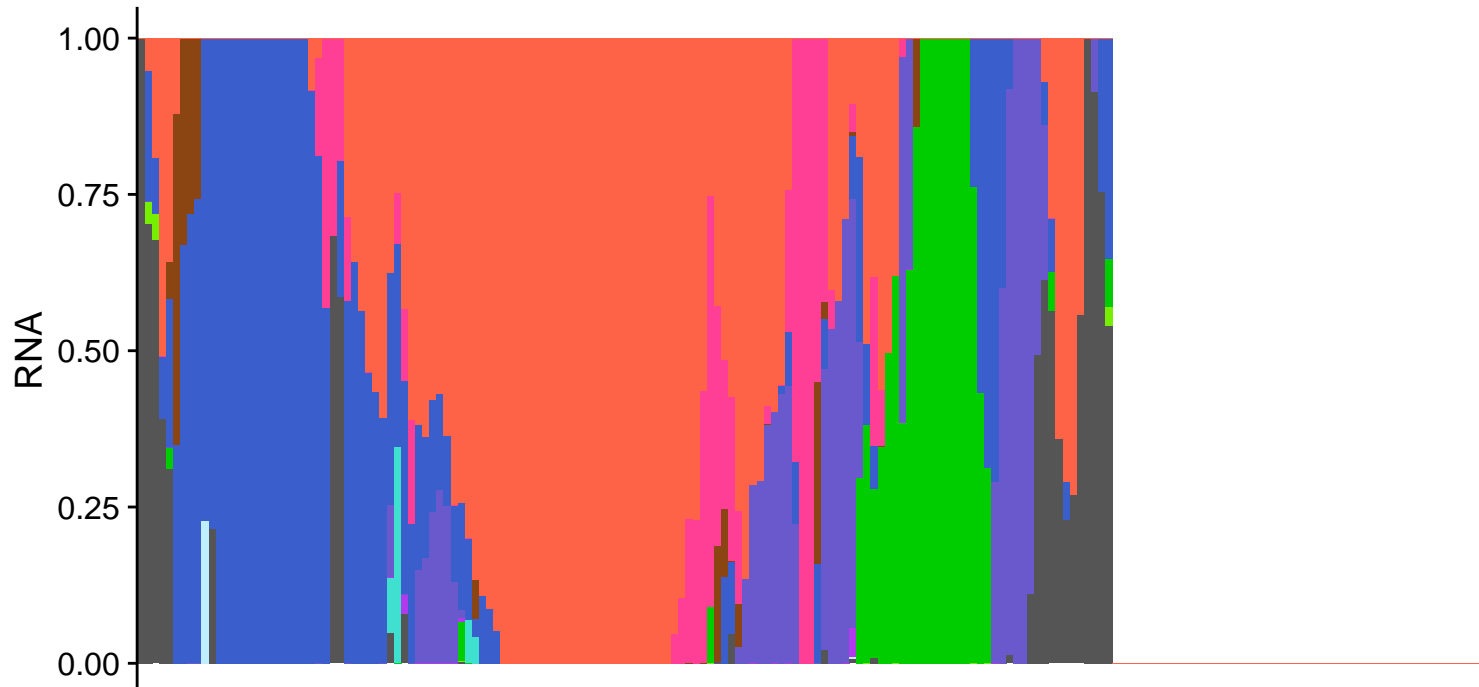

Person-week pair (RNA>0 n = 137)

## Bug

- Bacteroides ovatus*
- Bacteroides xylanisolvens*
- Odoribacter splanchnicus*
- Faecalibacterium prausnitzii*
- Roseburia intestinalis*
- Ruminococcus torques*
- Anaerostipes hadrus*
- Lachnospiraceae bacterium 5\_1\_63FAA*
- Phascolarctobacterium succinatutens*
- Akkermansia muciniphila*
- Escherichia coli*
- other*

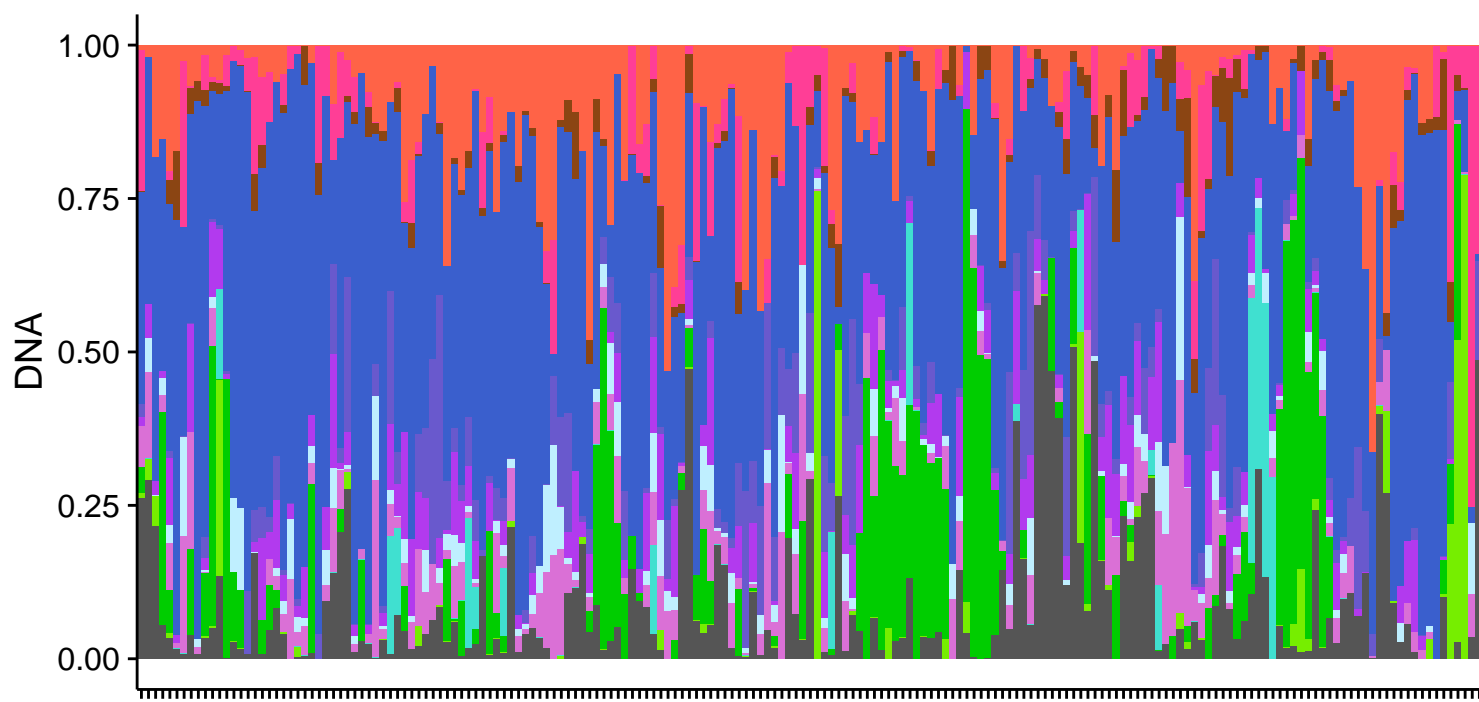

Person-week pair (DNA>0 n = 189)

# PWY-6703: preQ0 biosynthesis

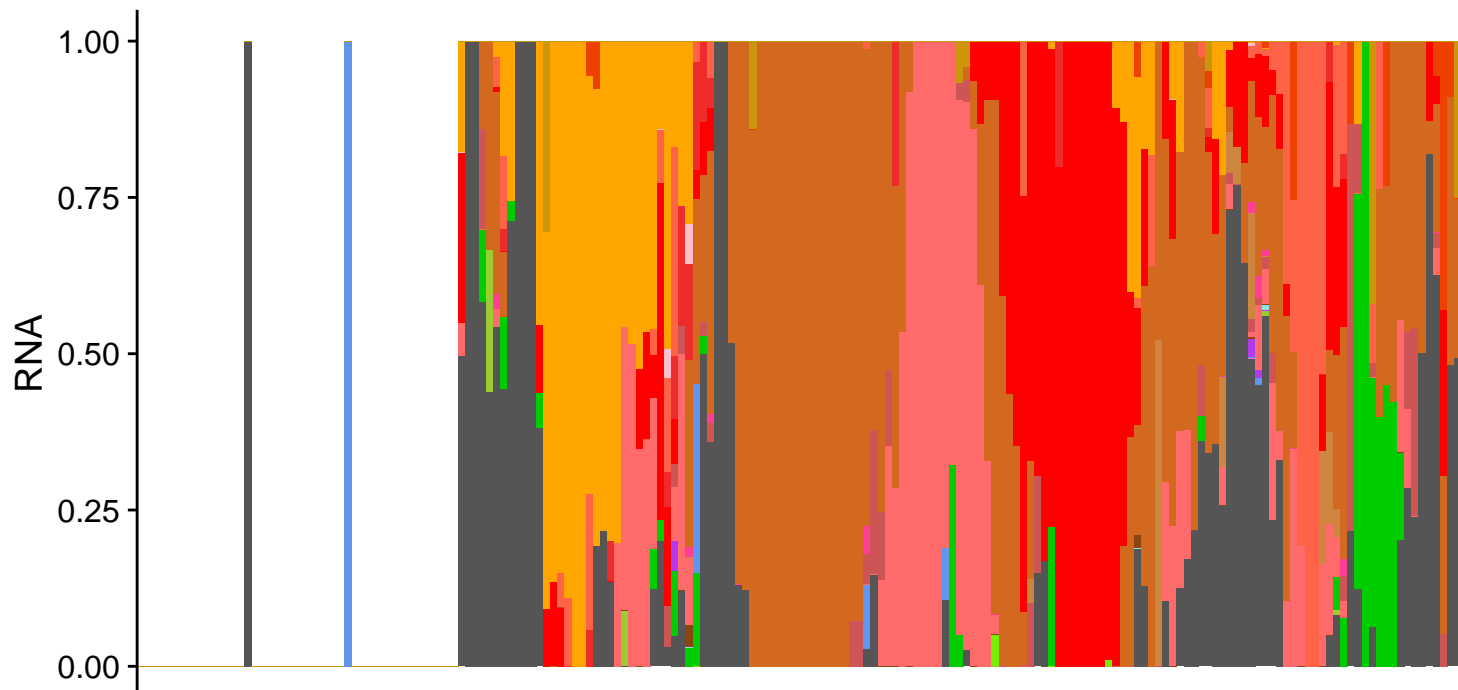

Person-week pair (RNA>0 n = 144)

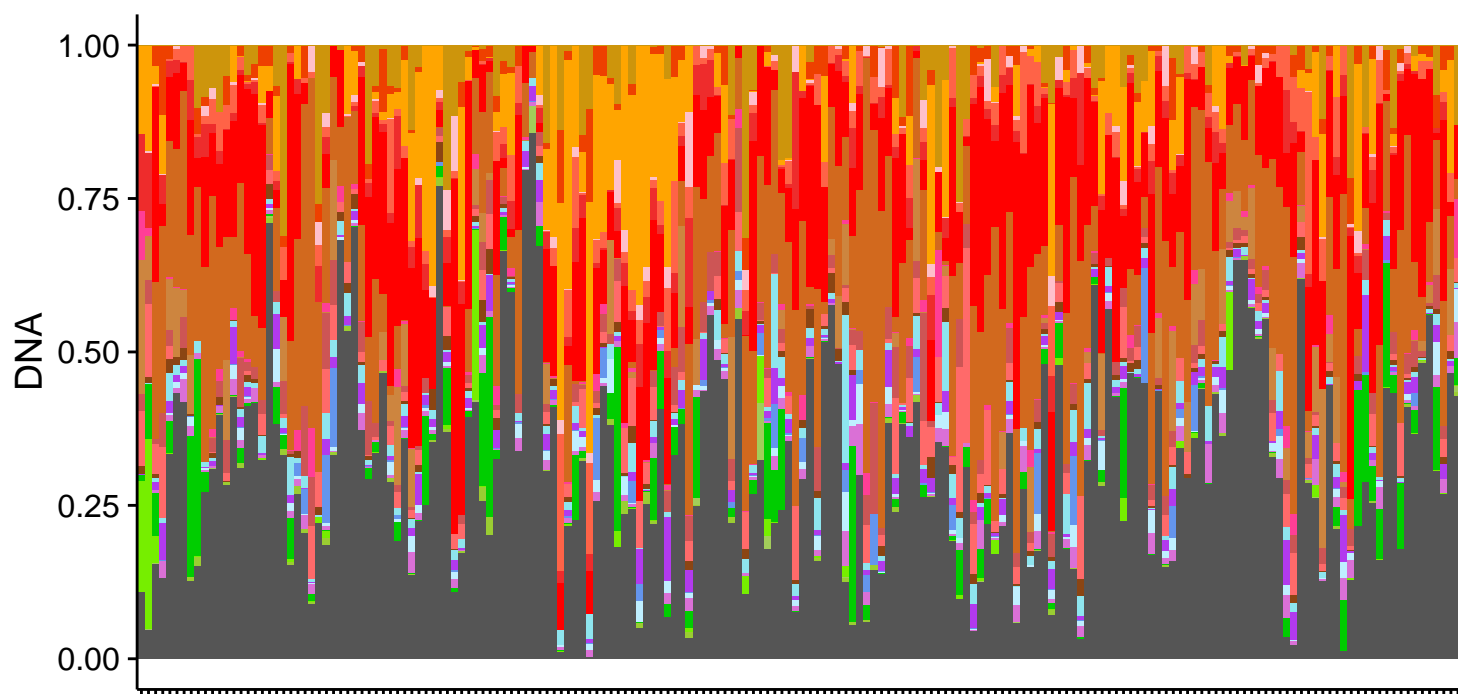

Person-week pair (DNA>0 n = 189)

## Bug

- Alistipes putredinis*
- Bacteroides caccae*
- Bacteroides dorei*
- Bacteroides fragilis*
- Bacteroides ovatus*
- Bacteroides thetaiotaomicron*
- Bacteroides uniformis*
- Bacteroides vulgatus*
- Bacteroides xylanisolvens*
- Bacteroides massiliensis*
- Parabacteroides merdae*
- Parabacteroides distasonis*
- Odoribacter splanchnicus*
- Eubacterium hallii*
- Ruminococcus torques*
- Streptococcus salivarius*
- Anaerostipes hadrus*
- Lachnospiraceae bacterium 5 1 63FAA*
- Akkermansia muciniphila*
- Escherichia coli*
- Klebsiella pneumoniae*
- Bilophila wadsworthia*
- other

# PWY0-845: superpathway of pyridoxal 5'-phosphate biosynthesis and salvage

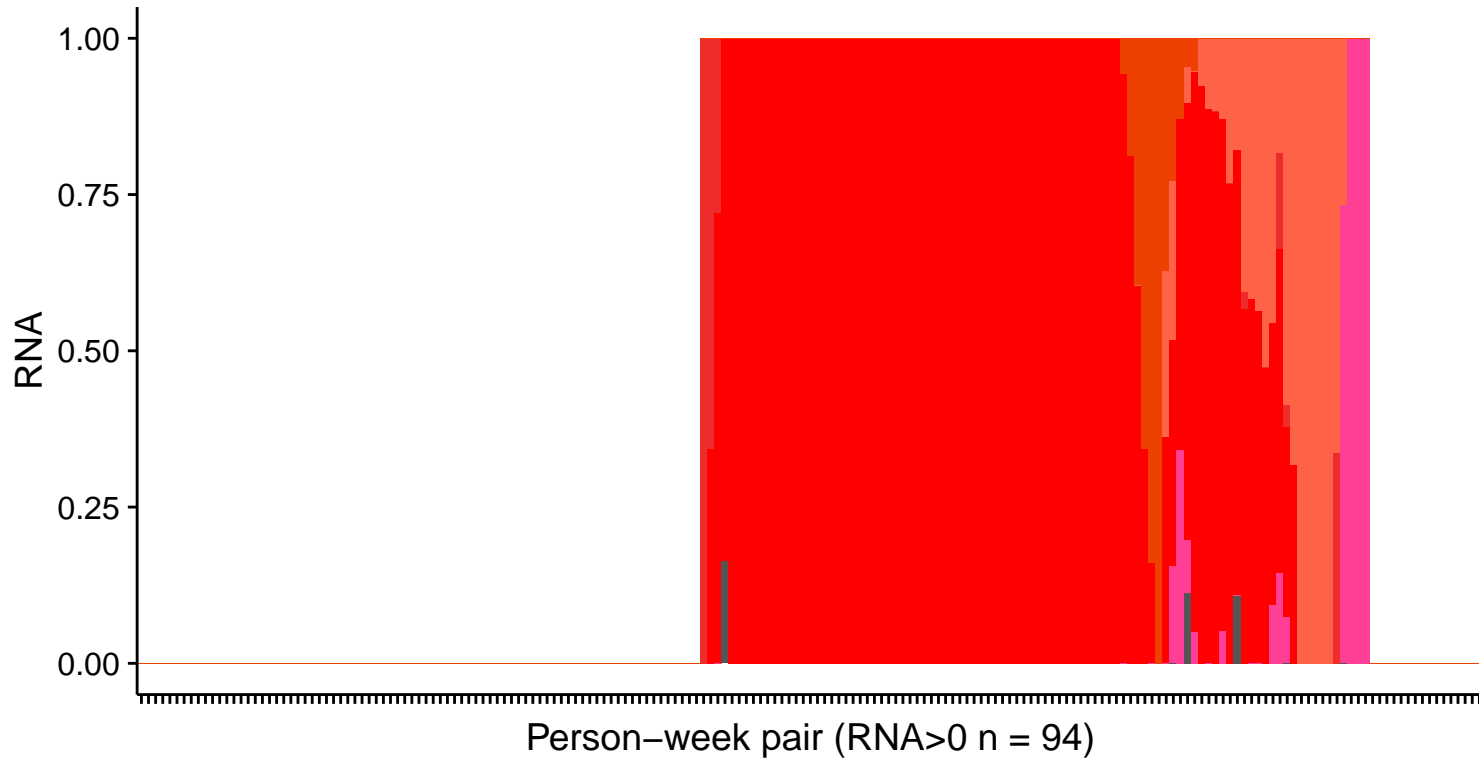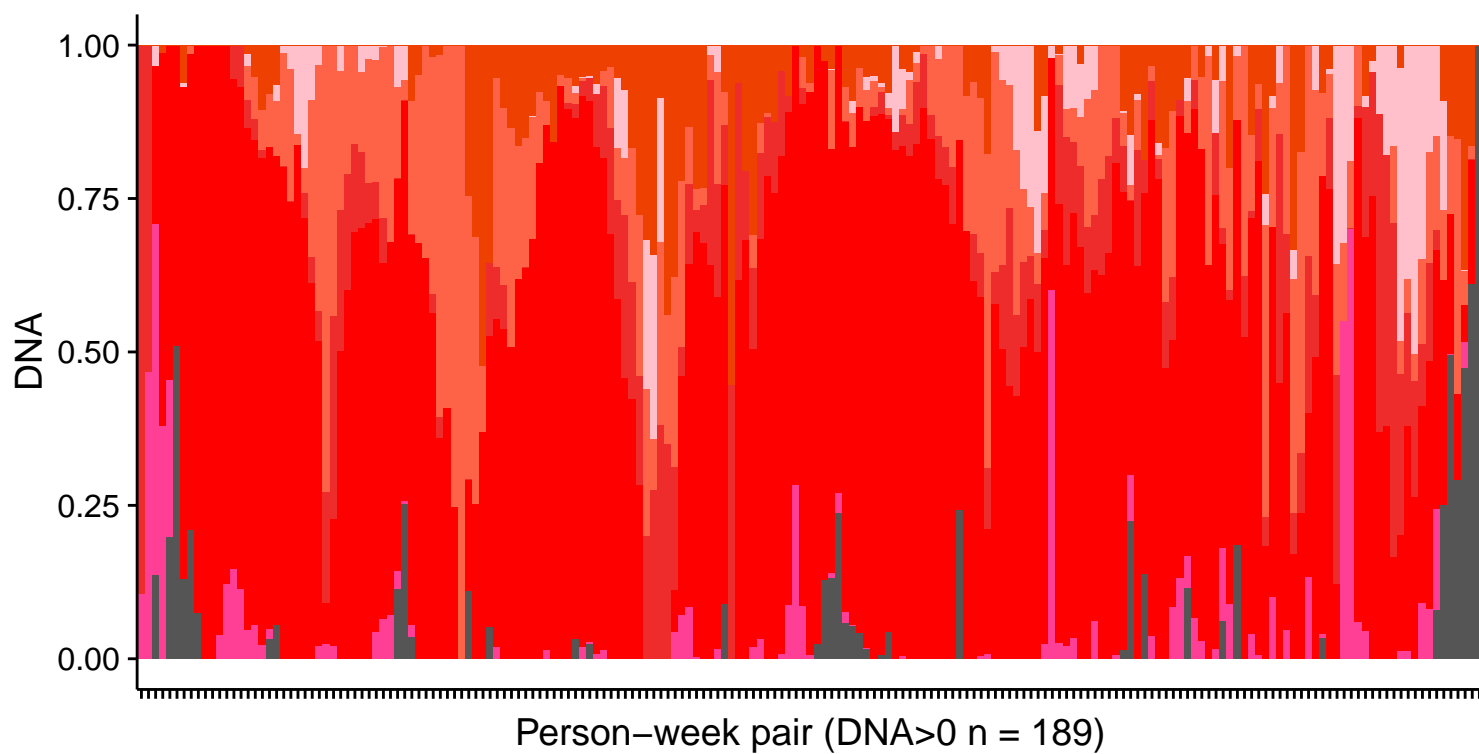

## Bug

- Bacteroides caccae*
- Bacteroides fragilis*
- Bacteroides ovatus*
- Bacteroides thetaiotaomicron*
- Bacteroides uniformis*
- Bacteroides xylanisolvans*
- other

# PWY-6121: 5-aminoimidazole ribonucleotide biosynthesis I

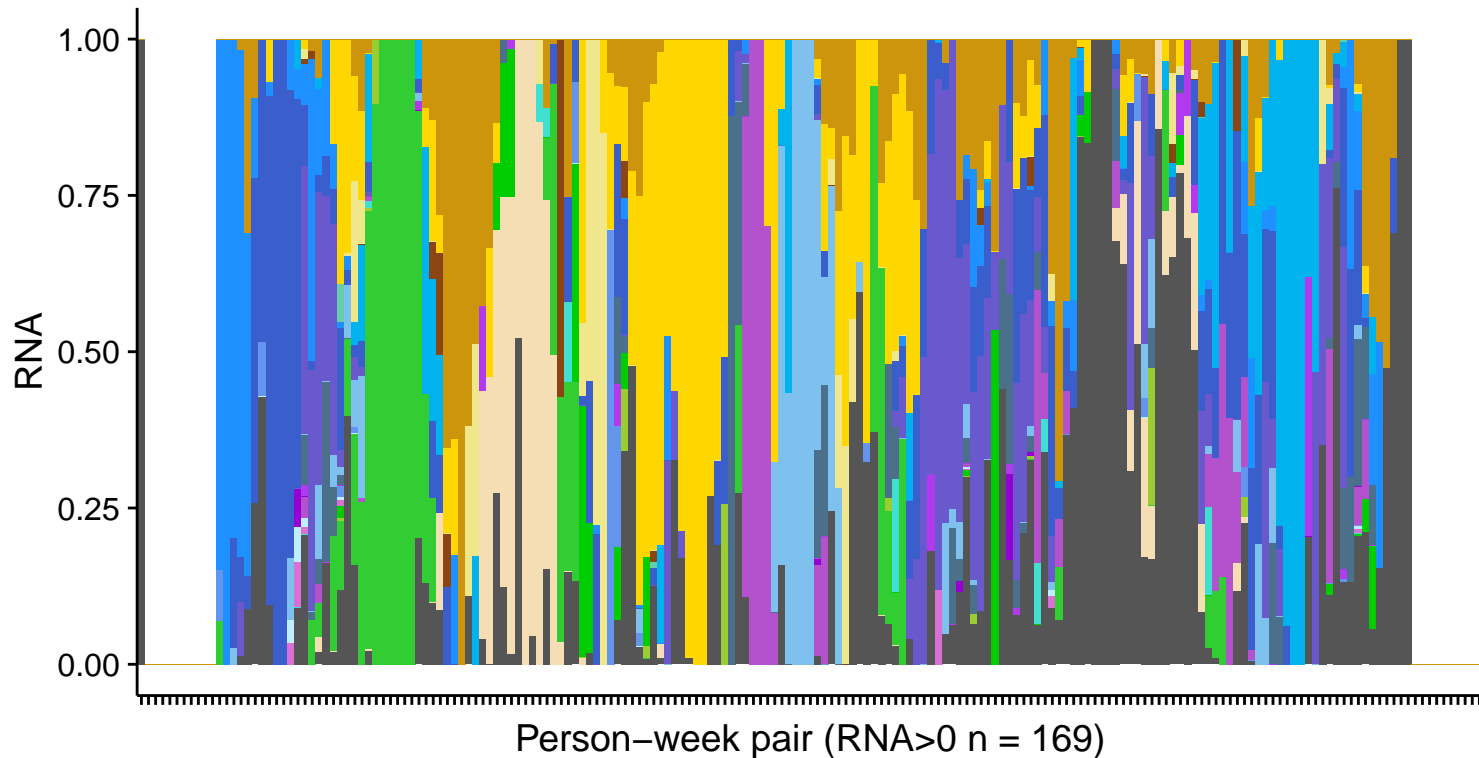

## Bug

- Alistipes putredinis*
- Alistipes onderdonkii*
- Alistipes finegoldii*
- Odoribacter splanchnicus*
- Coprococcus comes*
- Eubacterium siraeum*
- Eubacterium eligens*
- Faecalibacterium prausnitzii*
- Roseburia intestinalis*
- Roseburia hominis*
- Roseburia inulinivorans*
- Ruminococcus torques*
- Ruminococcus obeum*
- Ruminococcus bromii*
- Streptococcus salivarius*
- Anaerostipes hadrus*
- Lachnospiraceae bacterium 5\_1\_63FAA*
- Phascolarctobacterium succinatutens*
- Rothia mucilaginosa*
- Akkermansia muciniphila*
- Escherichia coli*
- Klebsiella pneumoniae*
- Haemophilus parainfluenzae*
- Bilophila wadsworthia*
- Sutterella wadsworthensis*
- Methanobrevibacter smithii*
- other

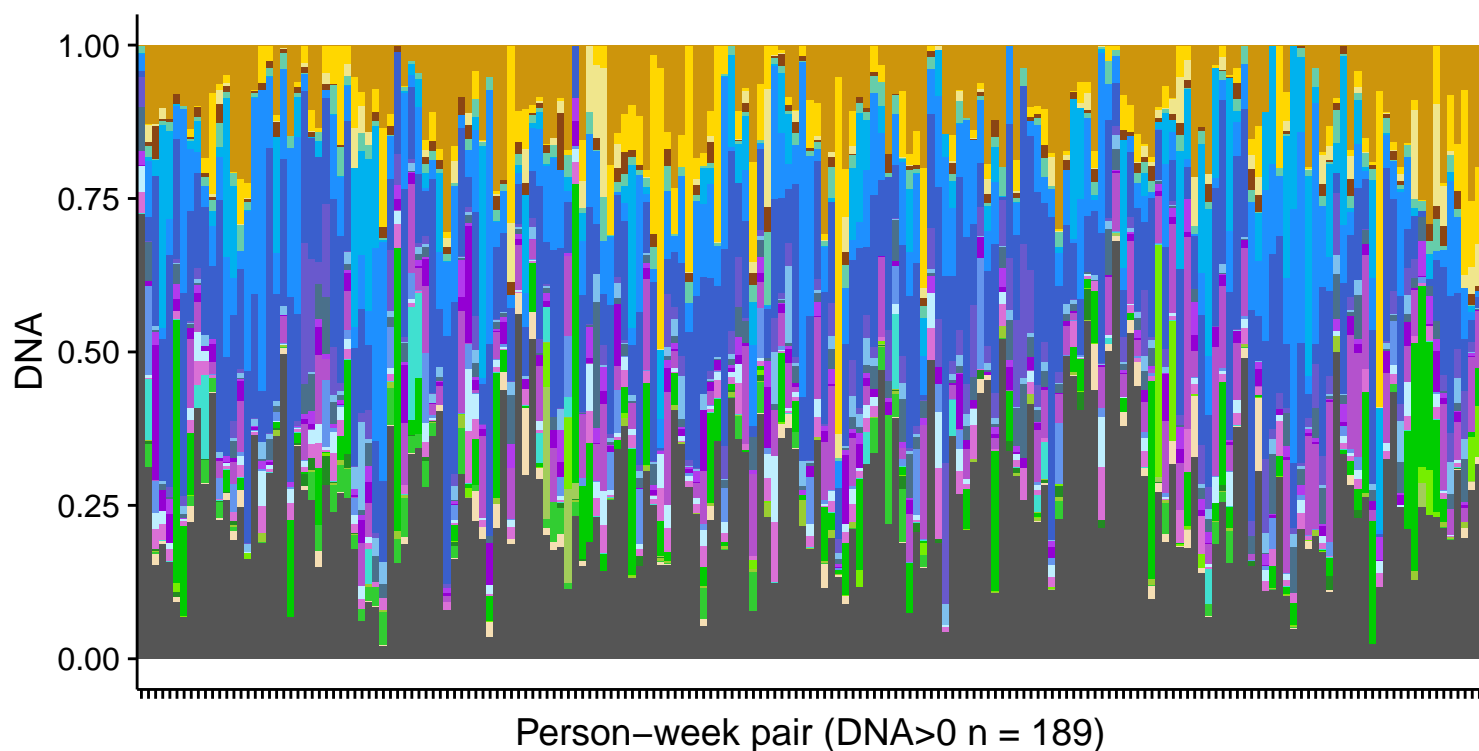

# ANAGLYCOLYSIS-PWY: glycolysis III (from glucose)

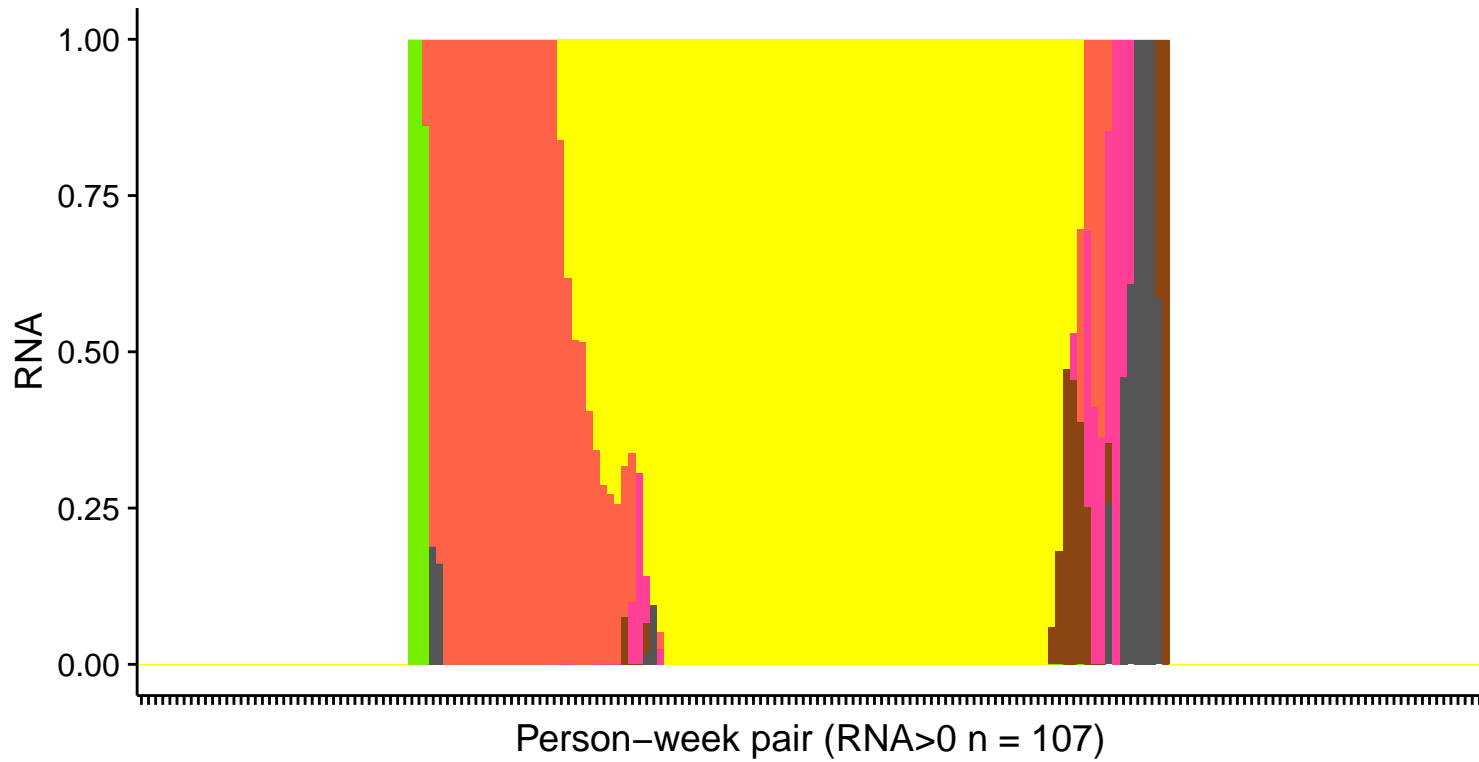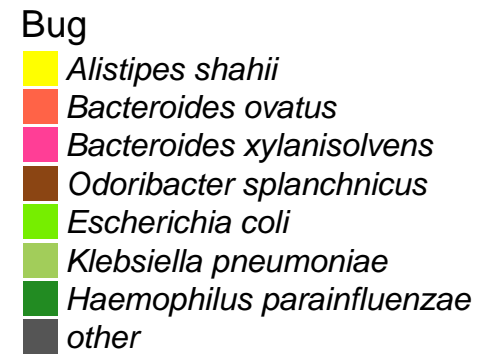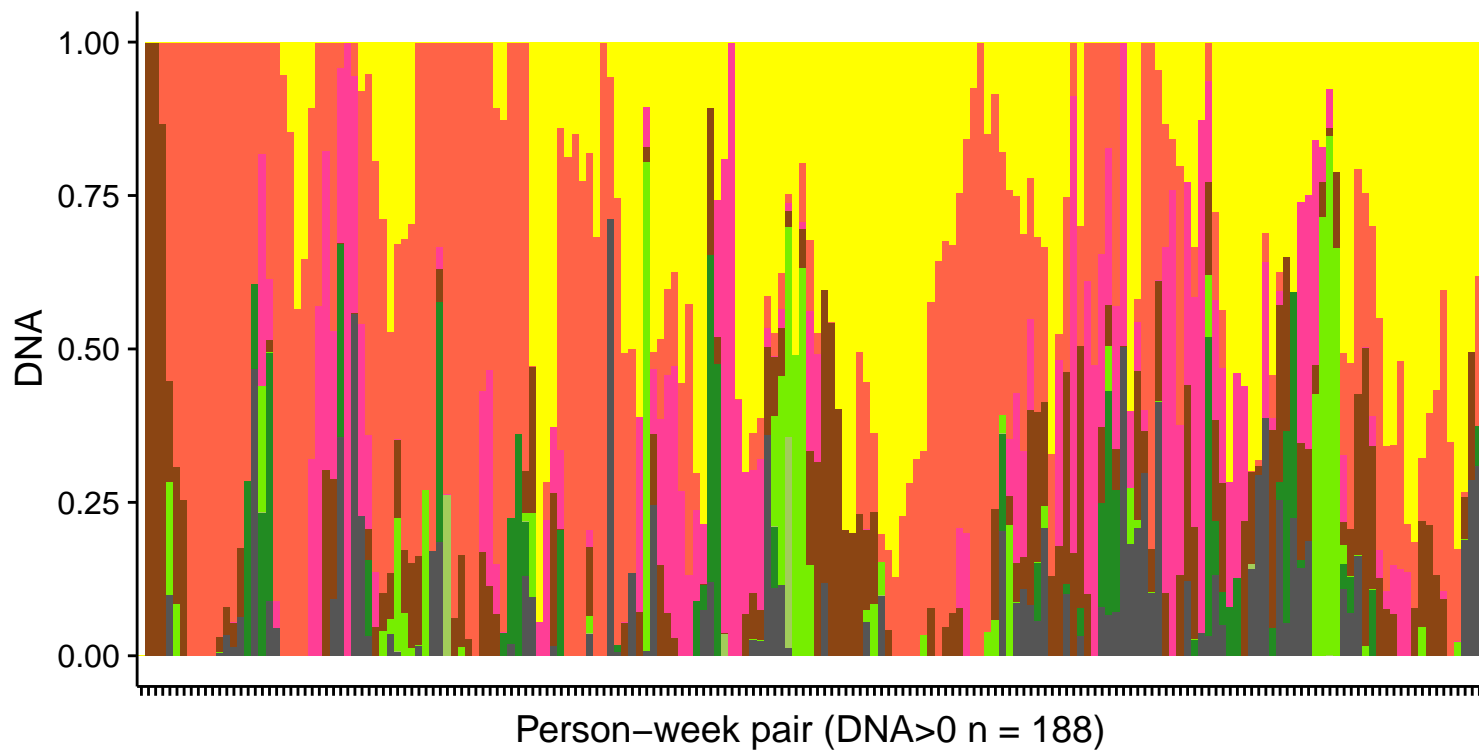

# NONMEVIPP-PWY: methylerythritol phosphate pathway I

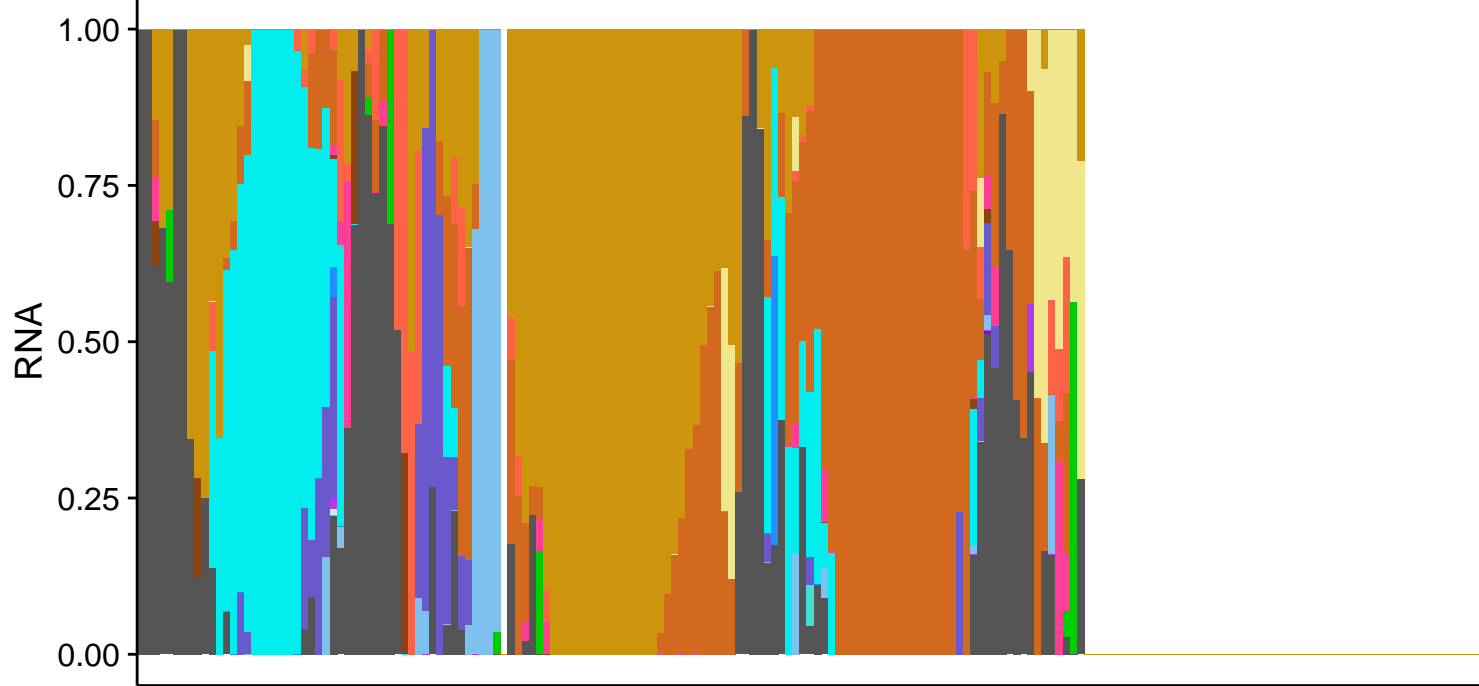

Person-week pair (RNA>0 n = 132)

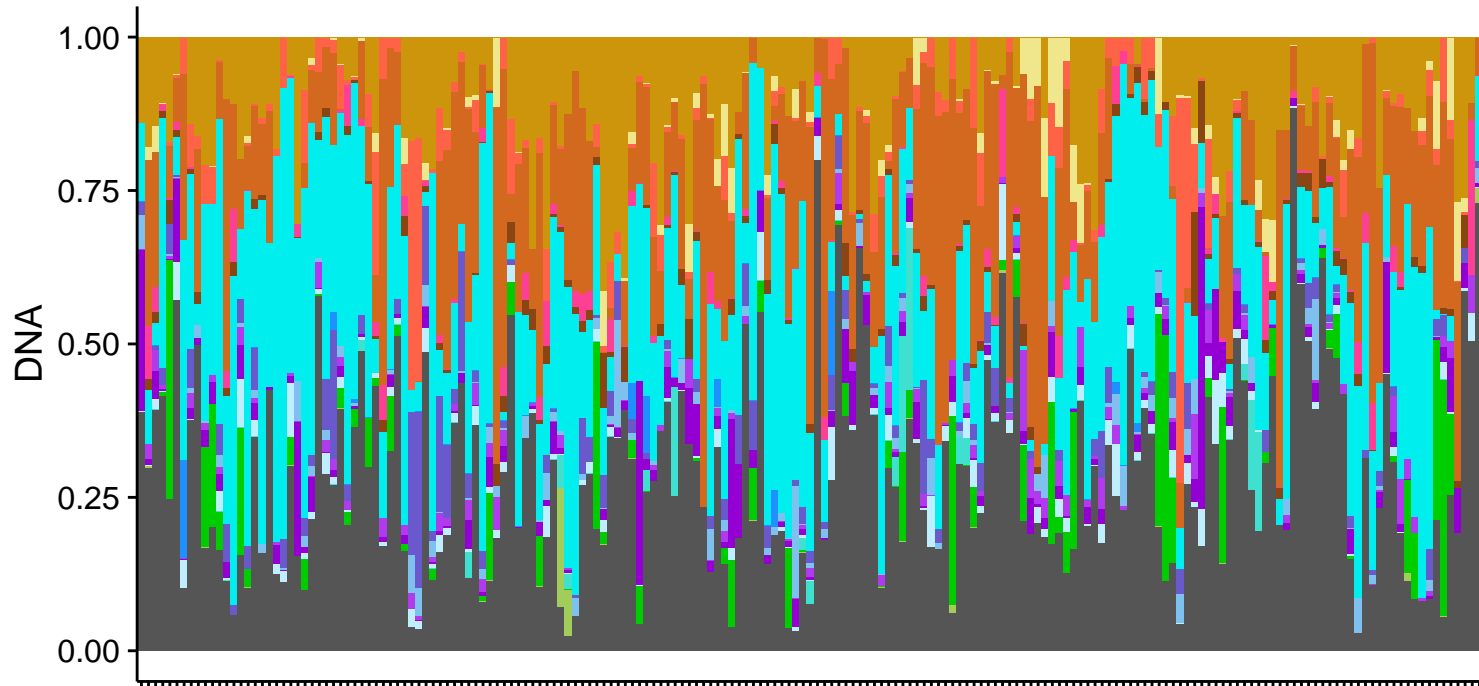

Person-week pair (DNA>0 n = 189)

## Bug

- Alistipes putredinis*
- Alistipes finegoldii*
- Bacteroides ovatus*
- Bacteroides vulgatus*
- Bacteroides xylanisolvens*
- Odoribacter splanchnicus*
- Eubacterium rectale*
- Eubacterium eligens*
- Roseburia intestinalis*
- Roseburia hominis*
- Ruminococcus torques*
- Ruminococcus obeum*
- Anaerostipes hadrus*
- Phascolarctobacterium succinatutens*
- Akkermansia muciniphila*
- Klebsiella pneumoniae*
- other*

PEPTIDOGLYCANSYN-PWY: peptidoglycan biosynthesis I (meso-diaminopimelate containing)

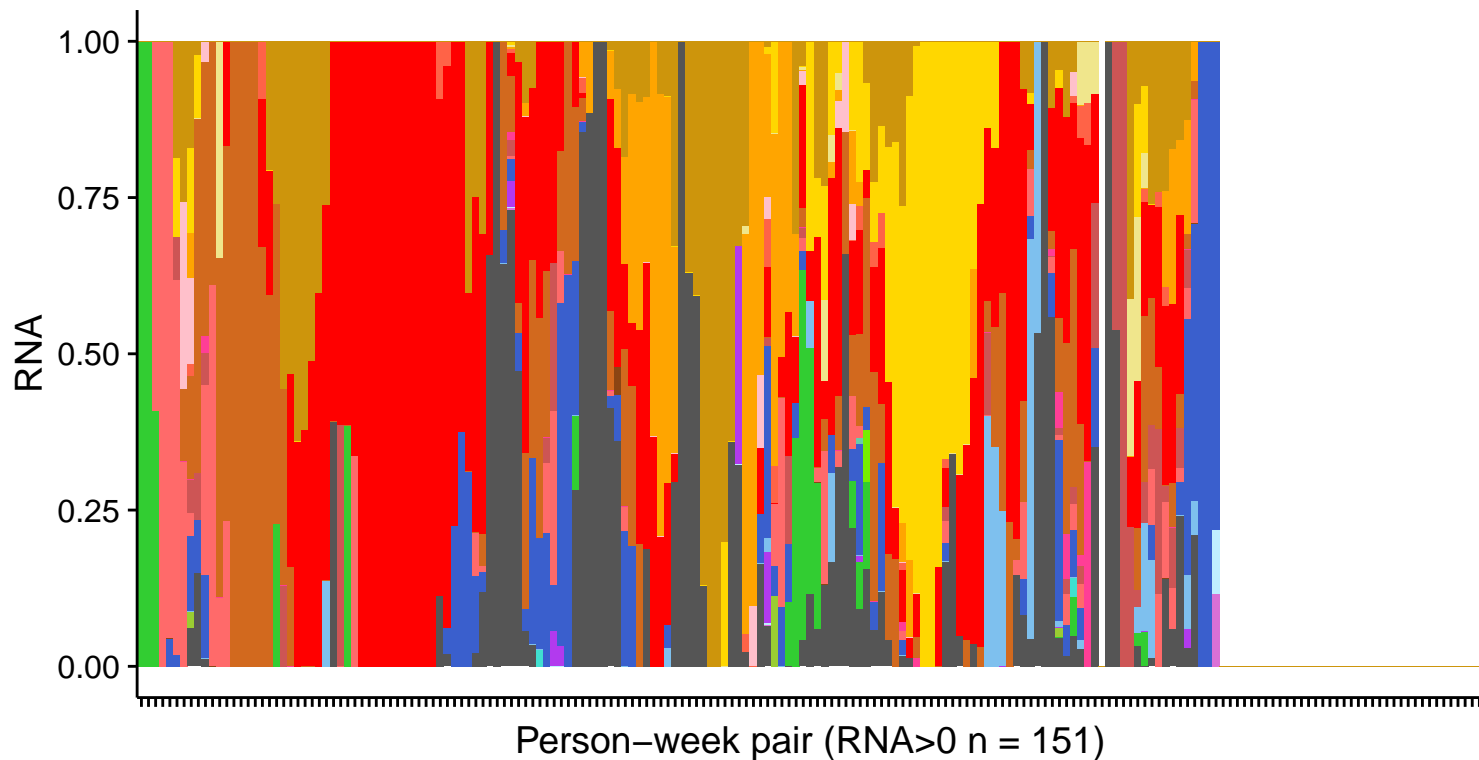

Bug

- Alistipes putredinis*
- Alistipes onderdonkii*
- Alistipes finegoldii*
- Bacteroides dorei*
- Bacteroides fragilis*
- Bacteroides ovatus*
- Bacteroides uniformis*
- Bacteroides vulgatus*
- Bacteroides xylanisolvens*
- Bacteroides massiliensis*
- Parabacteroides merdae*
- Parabacteroides distasonis*
- Odoribacter splanchnicus*
- Coprococcus comes*
- Faecalibacterium prausnitzii*
- Roseburia hominis*
- Ruminococcus torques*
- Ruminococcus obeum*
- Anaerostipes hadrus*
- Lachnospiraceae bacterium 5 1 63FAA*
- Phascolarctobacterium succinatutens*
- Rothia mucilaginosa*
- Escherichia coli*
- Haemophilus parainfluenzae*
- Bilophila wadsworthia*
- Sutterella wadsworthensis*
- other*

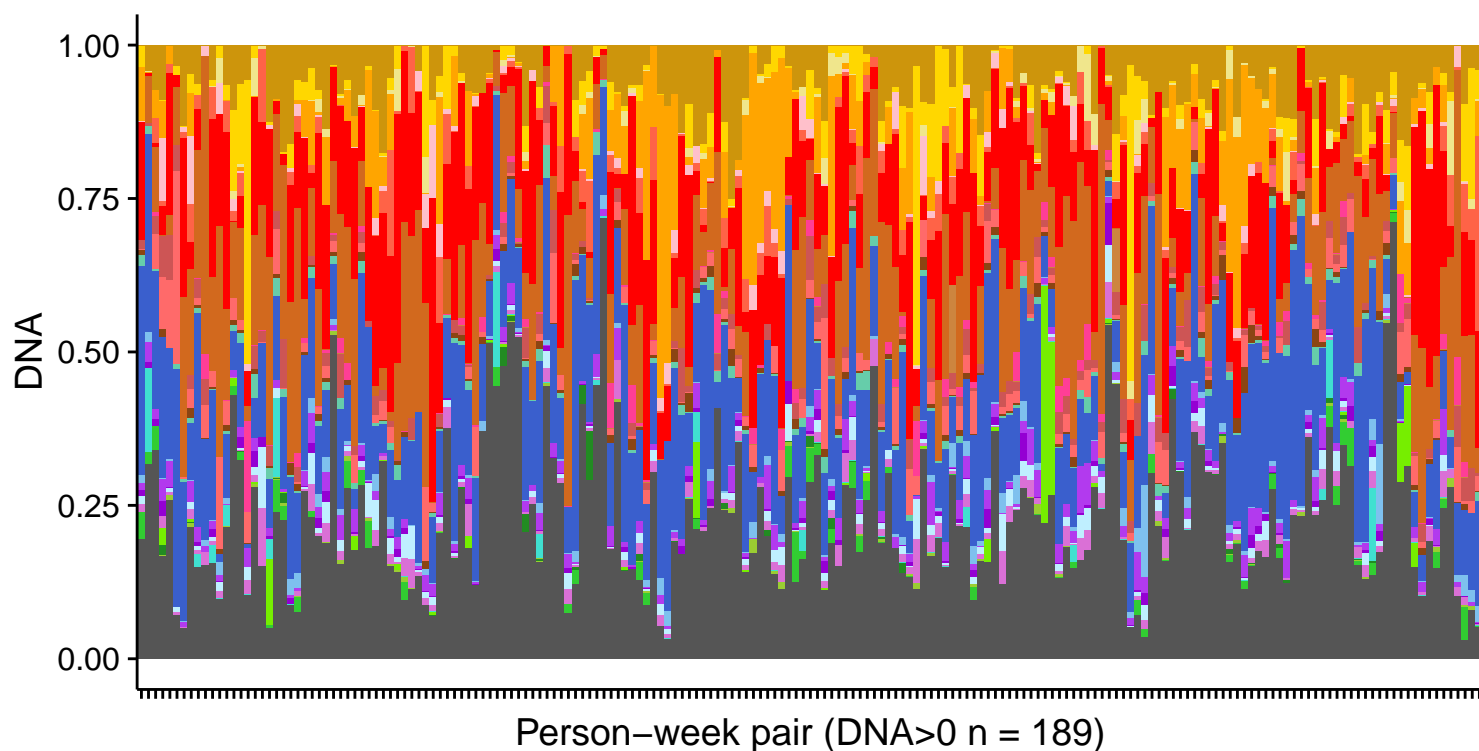



Y-6387: UDP-N-acetylmuramoyl-pentapeptide biosynthesis I (meso-diaminopimelate containing)

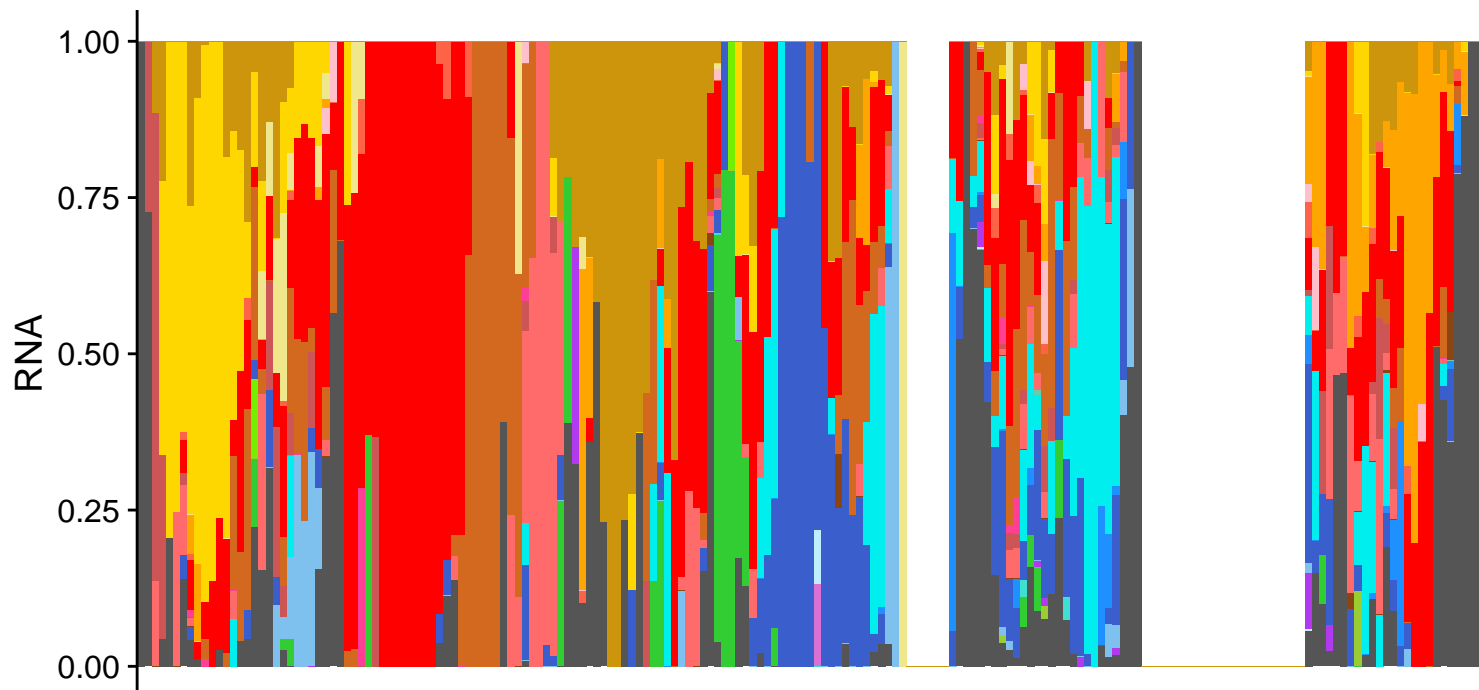

Person-week pair (RNA>0 n = 160)

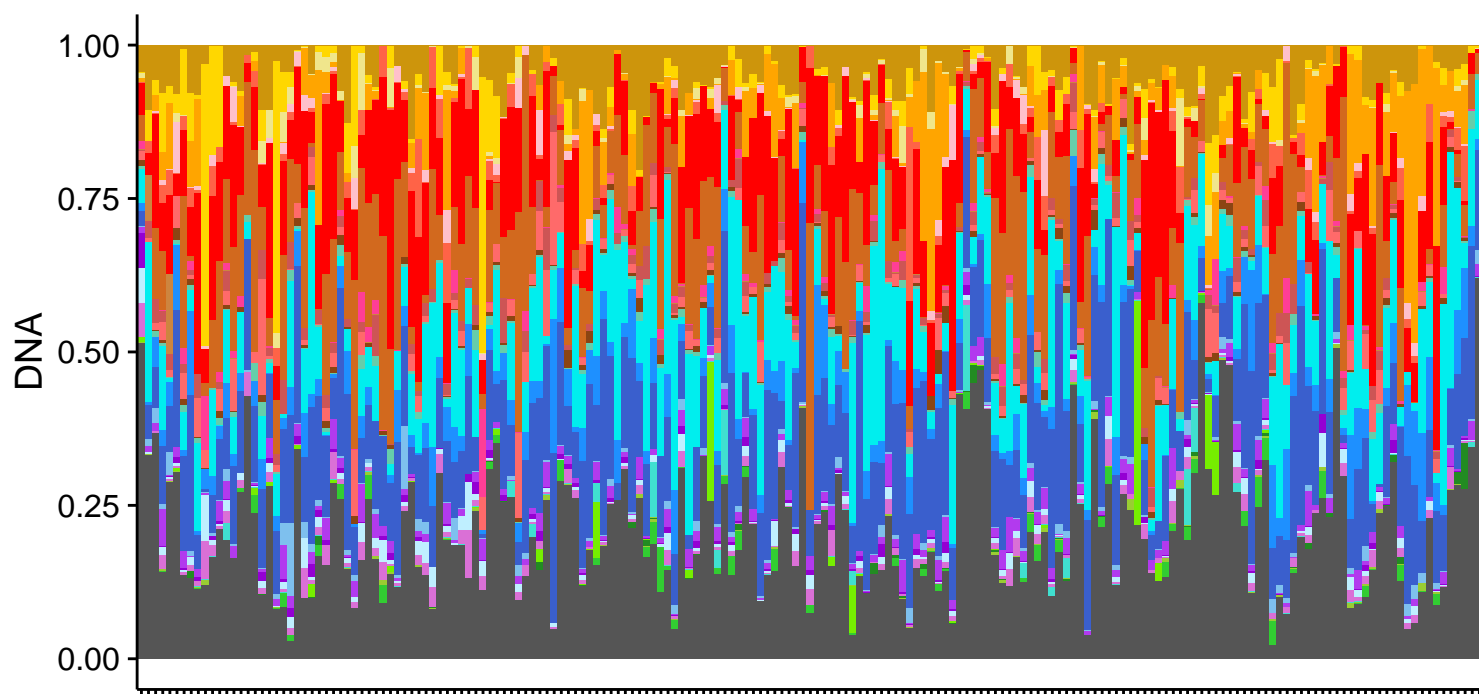

Person-week pair (DNA>0 n = 189)

Bug

- Alistipes putredinis*
- Alistipes onderdonkii*
- Alistipes finegoldii*
- Bacteroides dorei*
- Bacteroides fragilis*
- Bacteroides ovatus*
- Bacteroides uniformis*
- Bacteroides vulgatus*
- Bacteroides xylanisolvens*
- Bacteroides massiliensis*
- Parabacteroides merdae*
- Parabacteroides distasonis*
- Odoribacter splanchnicus*
- Coprococcus comes*
- Eubacterium rectale*
- Eubacterium eligens*
- Faecalibacterium prausnitzii*
- Roseburia hominis*
- Ruminococcus torques*
- Ruminococcus obeum*
- Anaerostipes hadrus*
- Lachnospiraceae bacterium 5 1 63FAA*
- Phascolarctobacterium succinatutens*
- Rothia mucilaginosa*
- Escherichia coli*
- Haemophilus parainfluenzae*
- Bilophila wadsworthia*
- Sutterella wadsworthensis*
- other*

# PWY-7197: pyrimidine deoxyribonucleotide phosphorylation

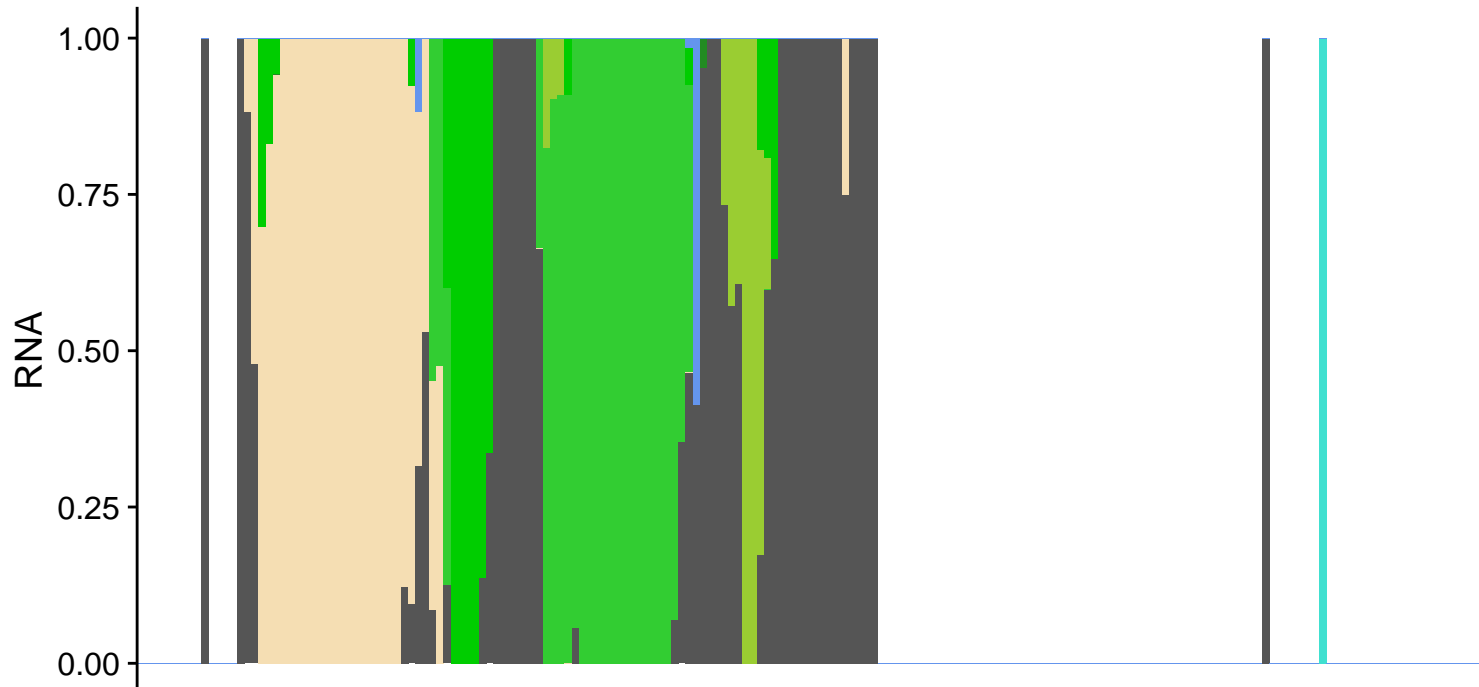

- Bug
- Streptococcus salivarius*
  - Phascolarctobacterium succinatutens*
  - Akkermansia muciniphila*
  - Escherichia coli*
  - Klebsiella pneumoniae*
  - Haemophilus parainfluenzae*
  - Bilophila wadsworthia*
  - Sutterella wadsworthensis*
  - Methanobrevibacter smithii*
  - other

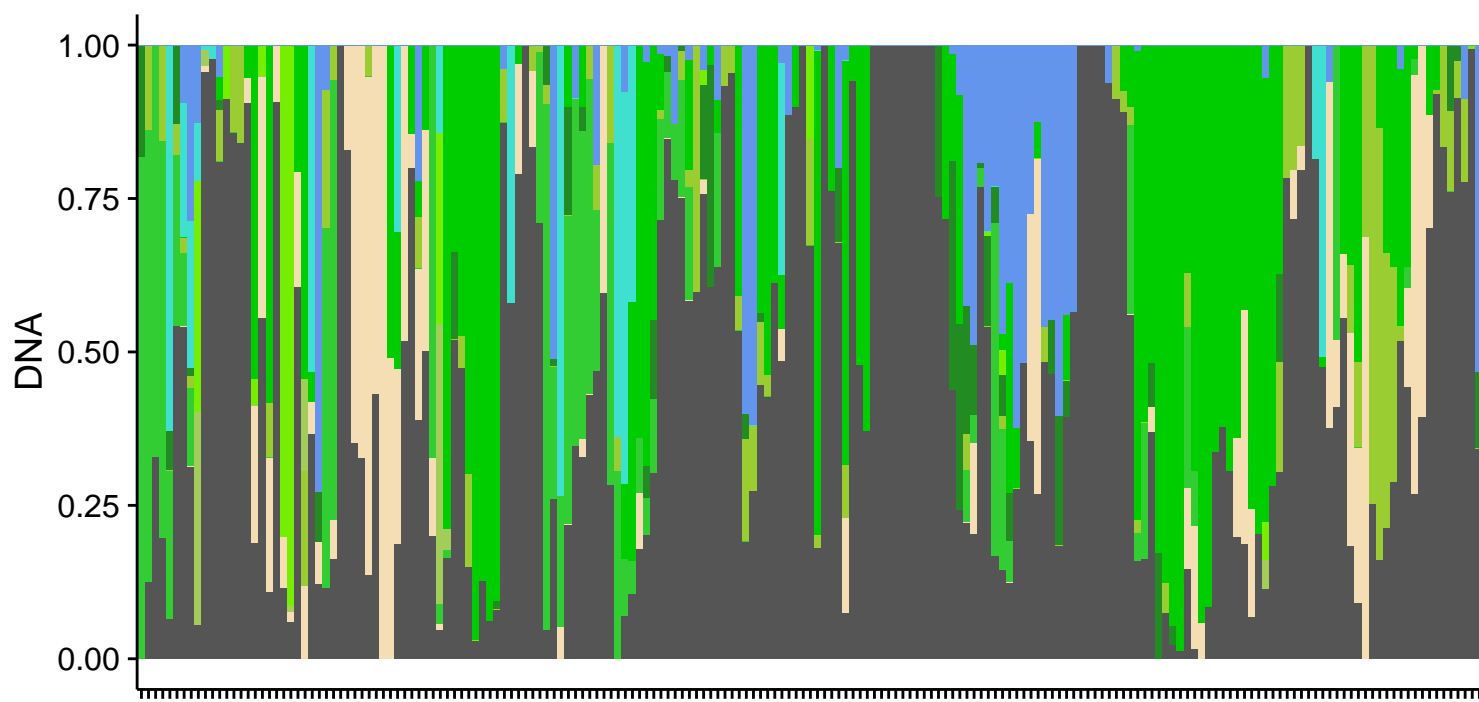

# PWY-6737: starch degradation V

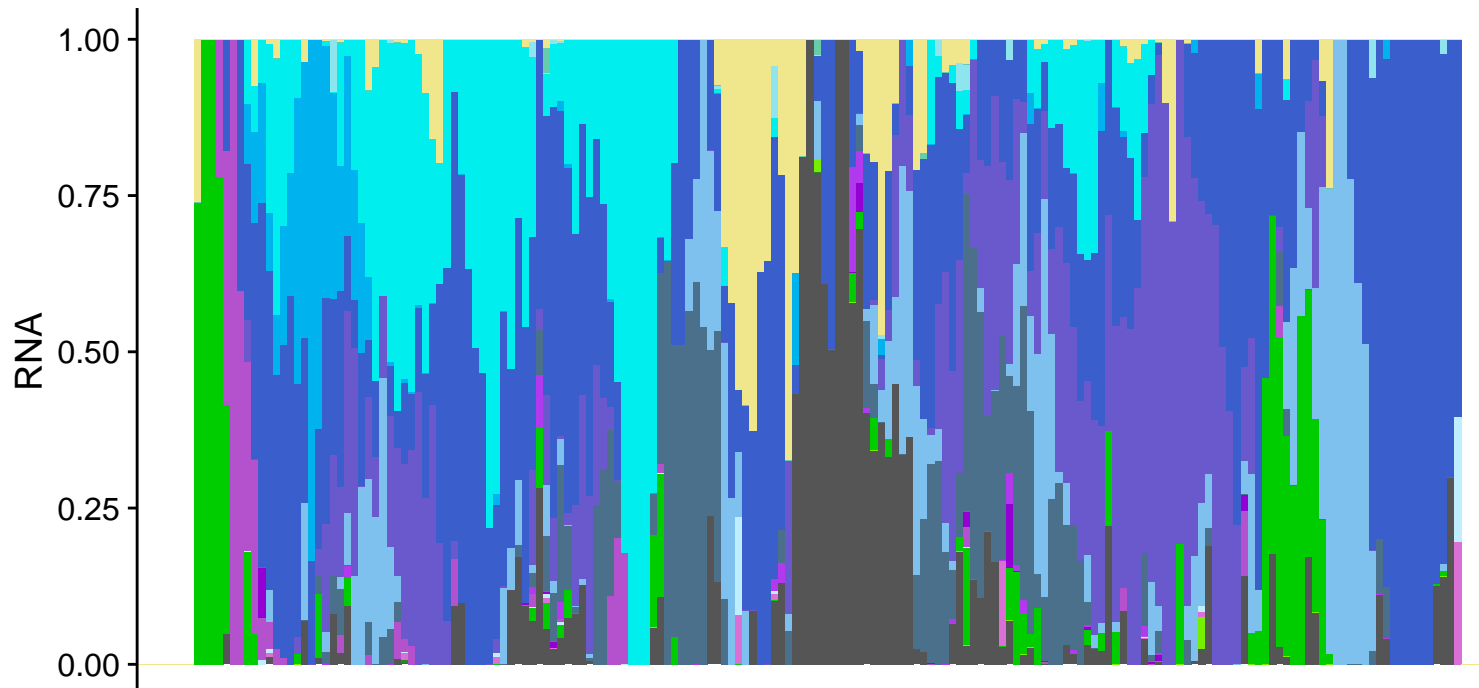

## Bug

- Alistipes finegoldii*
- Coprococcus comes*
- Eubacterium hallii*
- Eubacterium rectale*
- Eubacterium siraeum*
- Faecalibacterium prausnitzii*
- Roseburia intestinalis*
- Roseburia hominis*
- Roseburia inulinivorans*
- Ruminococcus torques*
- Ruminococcus obeum*
- Ruminococcus bromii*
- Anaerostipes hadrus*
- Lachnospiraceae bacterium 5\_1\_63FAA*
- Akkermansia muciniphila*
- Escherichia coli*
- Haemophilus parainfluenzae*
- other

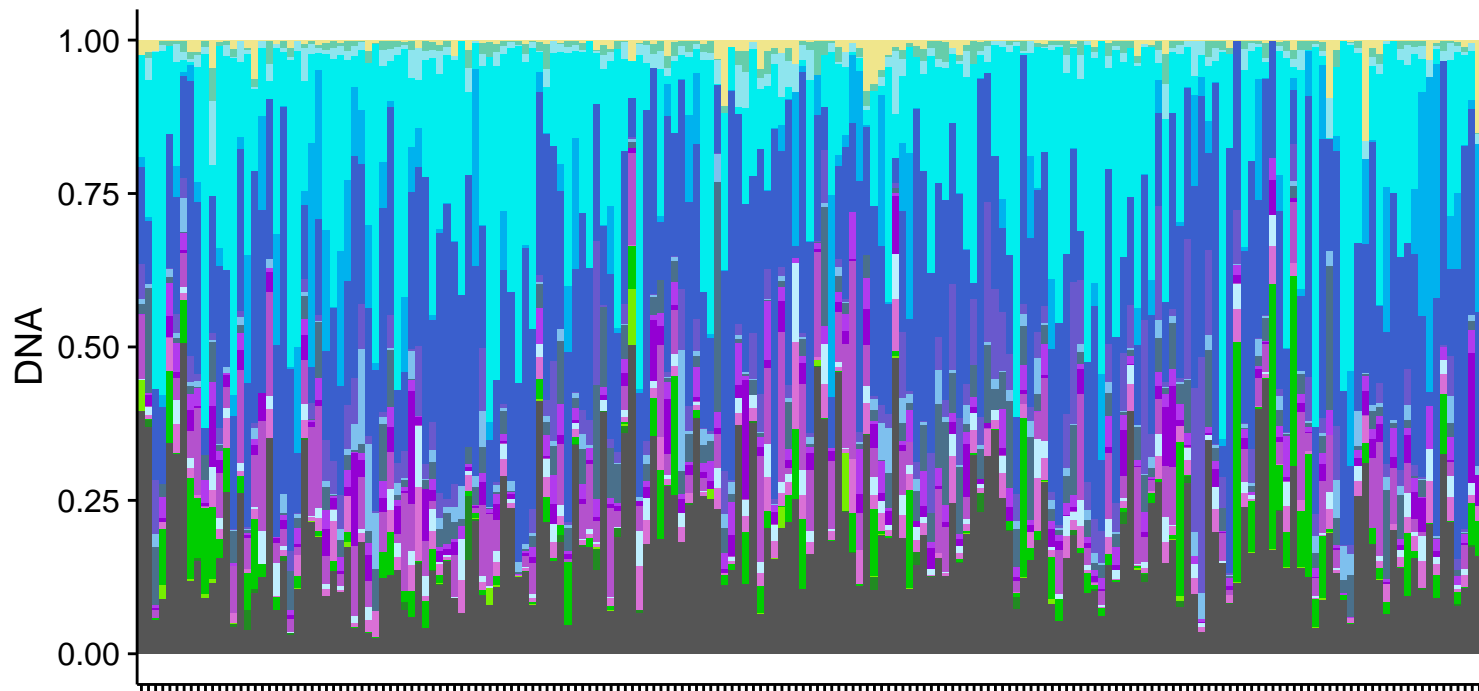

# COA-PWY-1: coenzyme A biosynthesis II (mammalian)

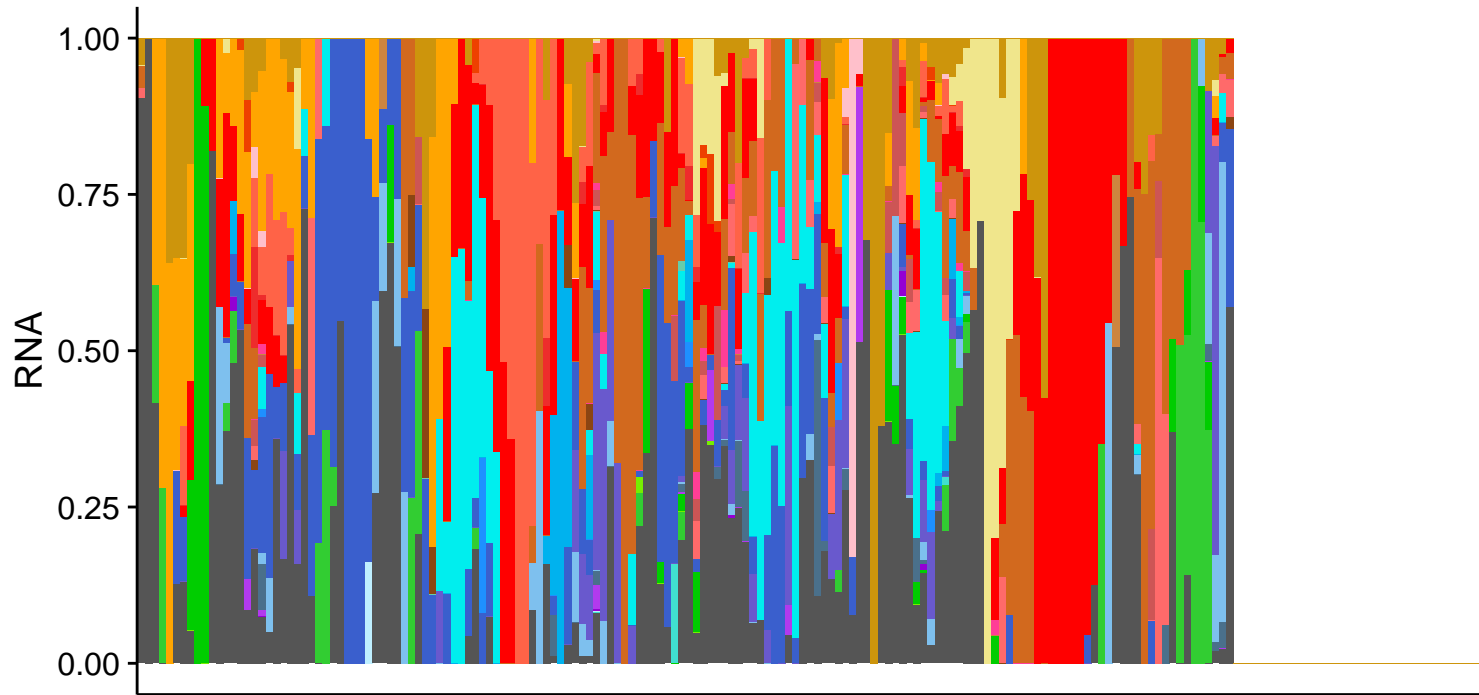

Person-week pair (RNA>0 n = 154)

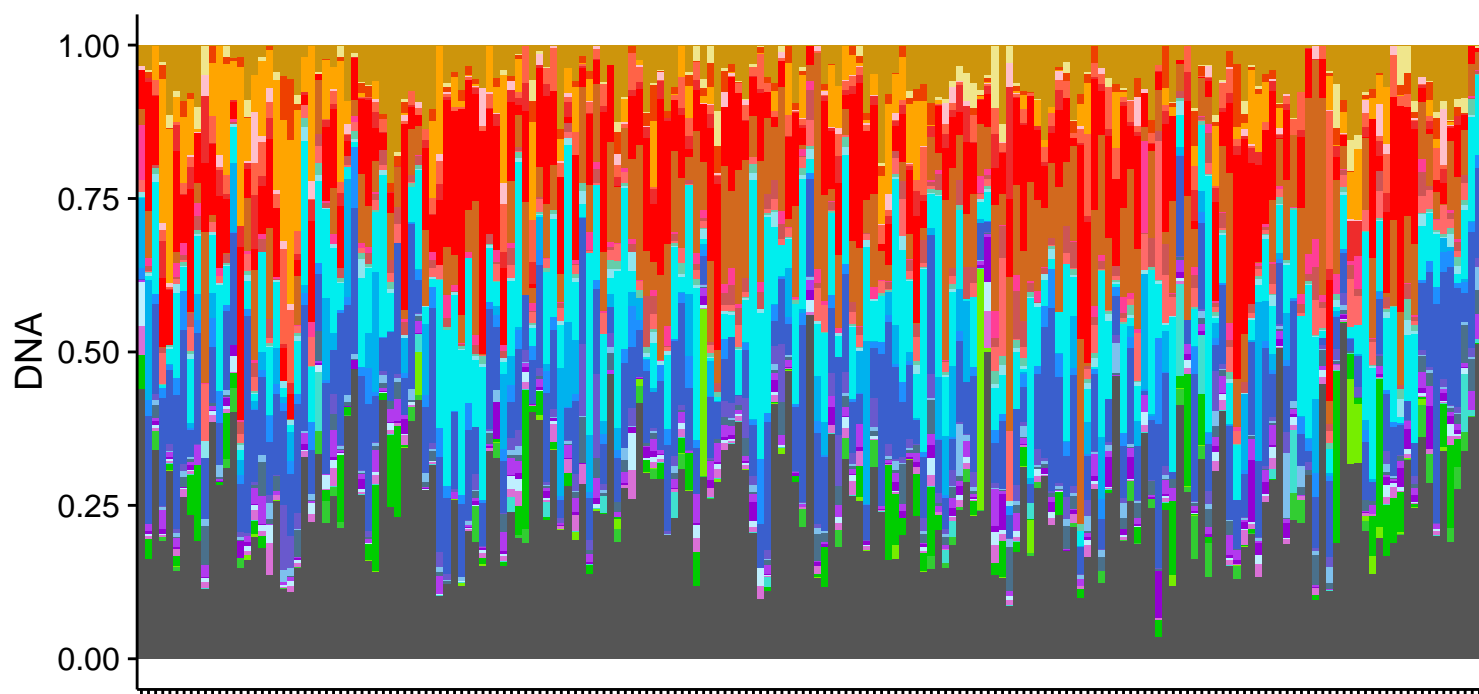

Person-week pair (DNA>0 n = 189)

## Bug

- Alistipes putredinis*
- Alistipes finegoldii*
- Bacteroides caccae*
- Bacteroides dorei*
- Bacteroides fragilis*
- Bacteroides ovatus*
- Bacteroides thetaiotaomicron*
- Bacteroides uniformis*
- Bacteroides vulgatus*
- Bacteroides xylanisolvens*
- Parabacteroides merdae*
- Parabacteroides distasonis*
- Coprococcus comes*
- Eubacterium hallii*
- Eubacterium rectale*
- Eubacterium siraeum*
- Eubacterium eligens*
- Faecalibacterium prausnitzii*
- Roseburia intestinalis*
- Roseburia hominis*
- Roseburia inulinivorans*
- Ruminococcus torques*
- Ruminococcus obeum*
- Anaerostipes hadrus*
- Lachnospiraceae bacterium 5\_1\_63FAA*
- Phascolarctobacterium succinatutens*
- Akkermansia muciniphila*
- Escherichia coli*
- Sutterella wadsworthensis*
- other*

# PWY-6608: guanosine nucleotides degradation III

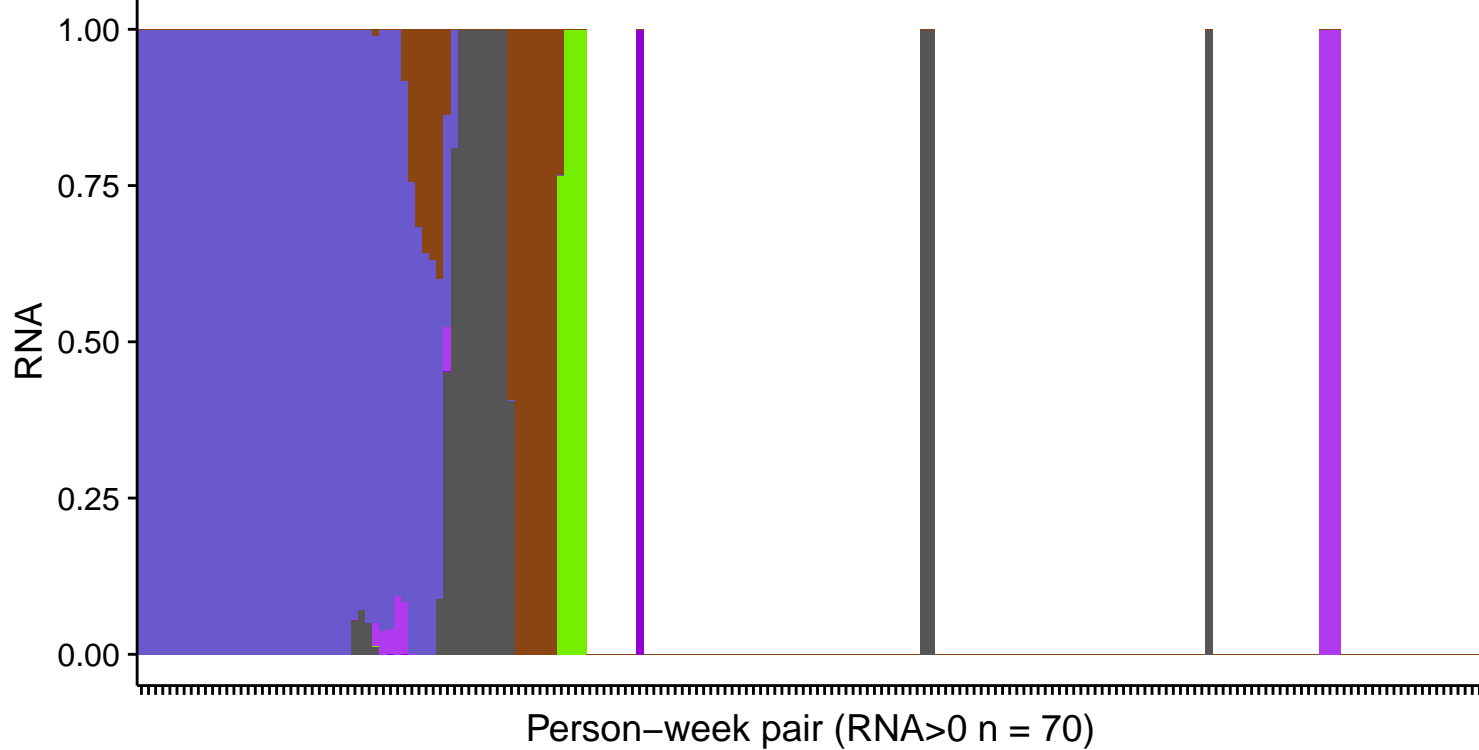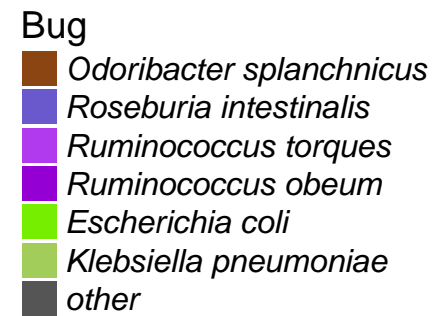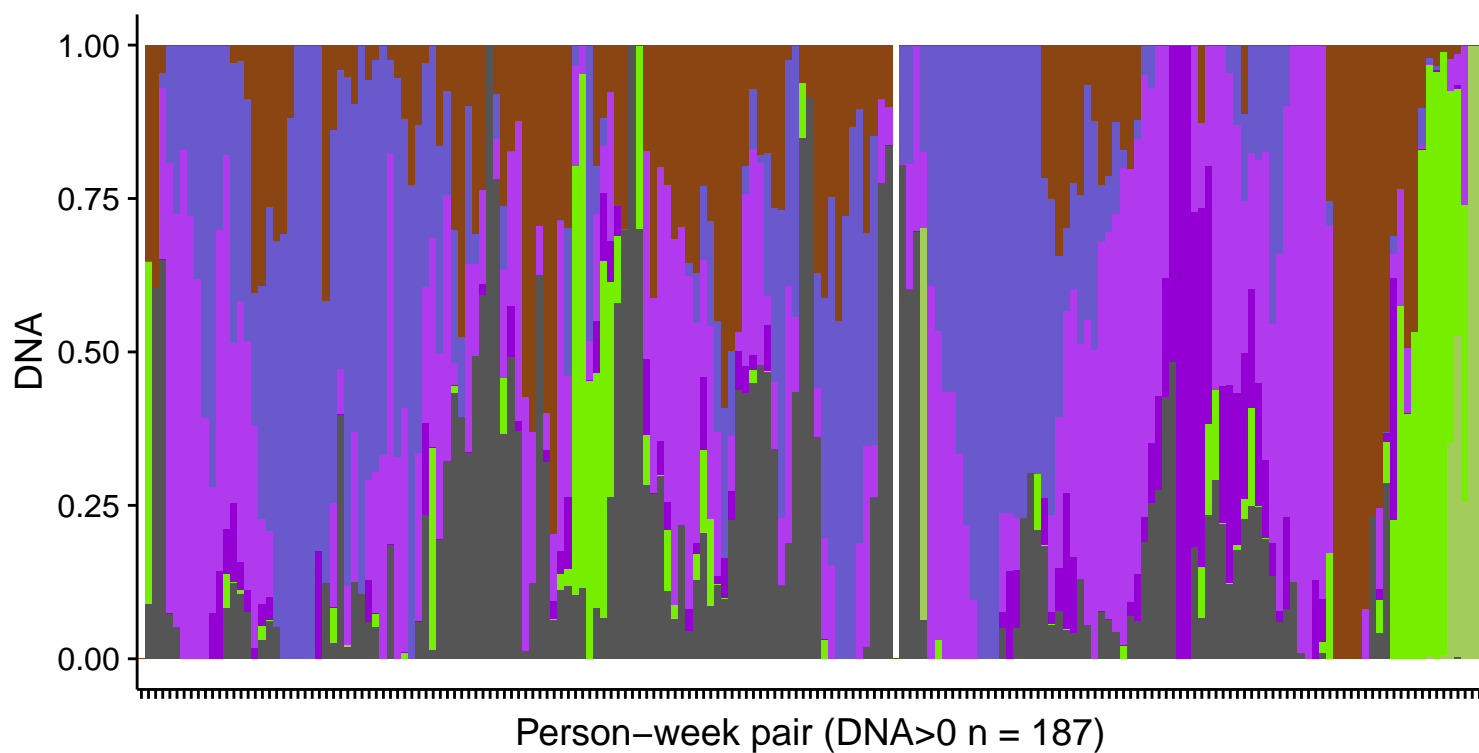

# PWY-621: sucrose degradation III (sucrose invertase)

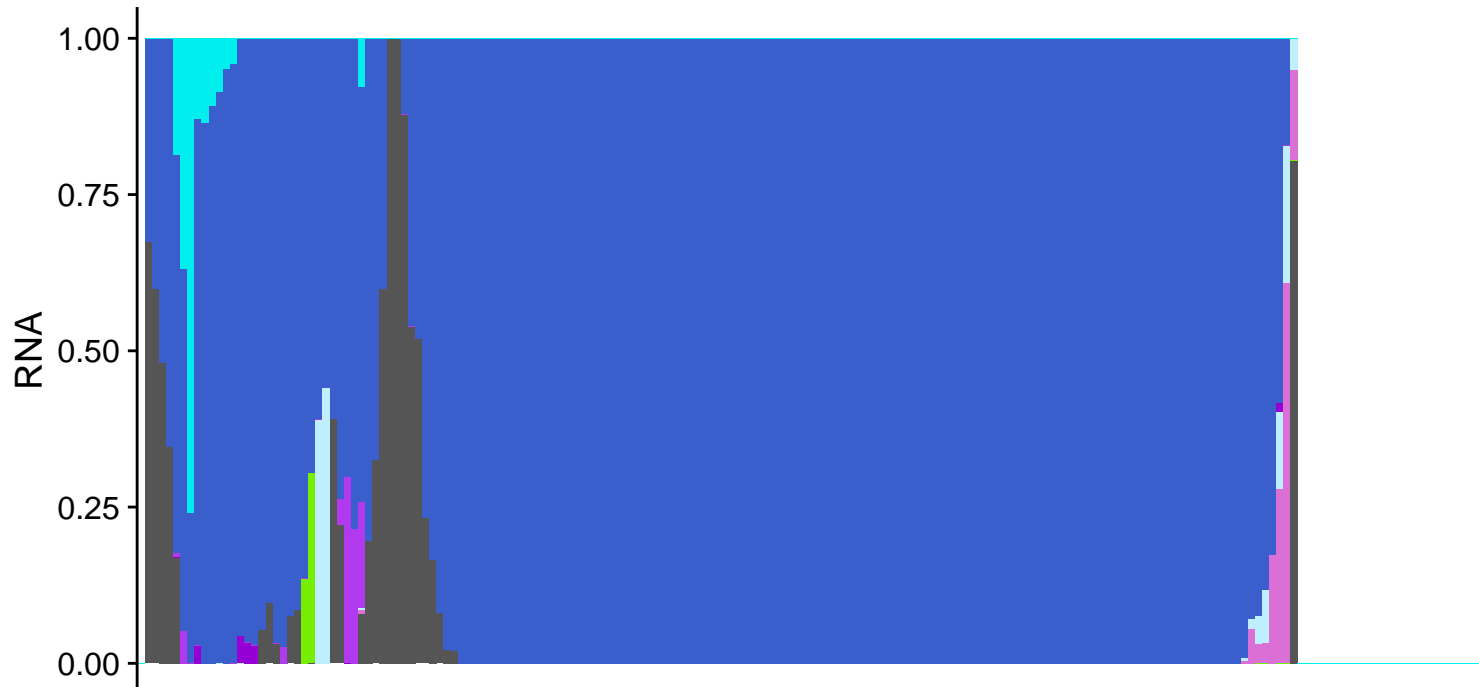

## Bug

- Eubacterium rectale*
- Faecalibacterium prausnitzii*
- Ruminococcus torques*
- Ruminococcus obeum*
- Anaerostipes hadrus*
- Lachnospiraceae bacterium 5\_1\_63FAA*
- Escherichia coli*
- Klebsiella pneumoniae*
- other*

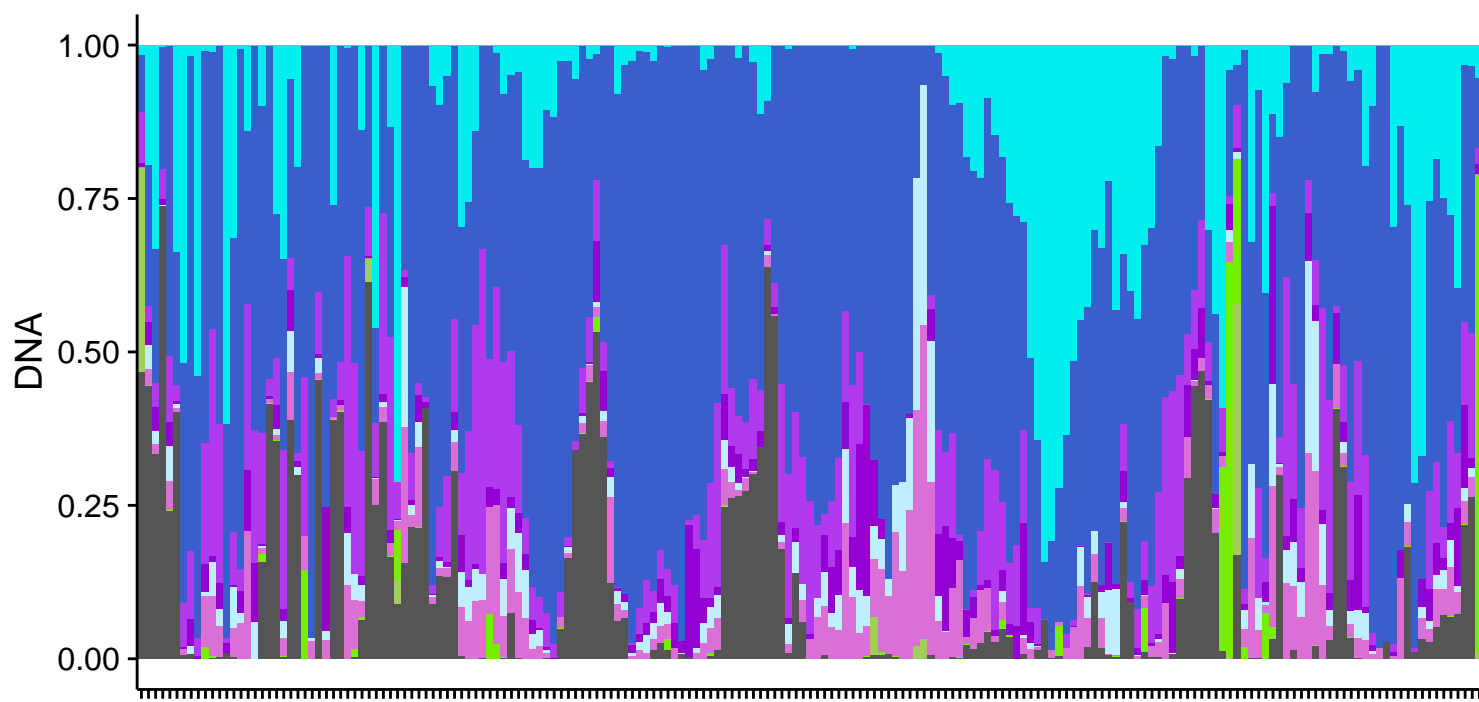

# HEMESYN2-PWY: heme biosynthesis II (anaerobic)

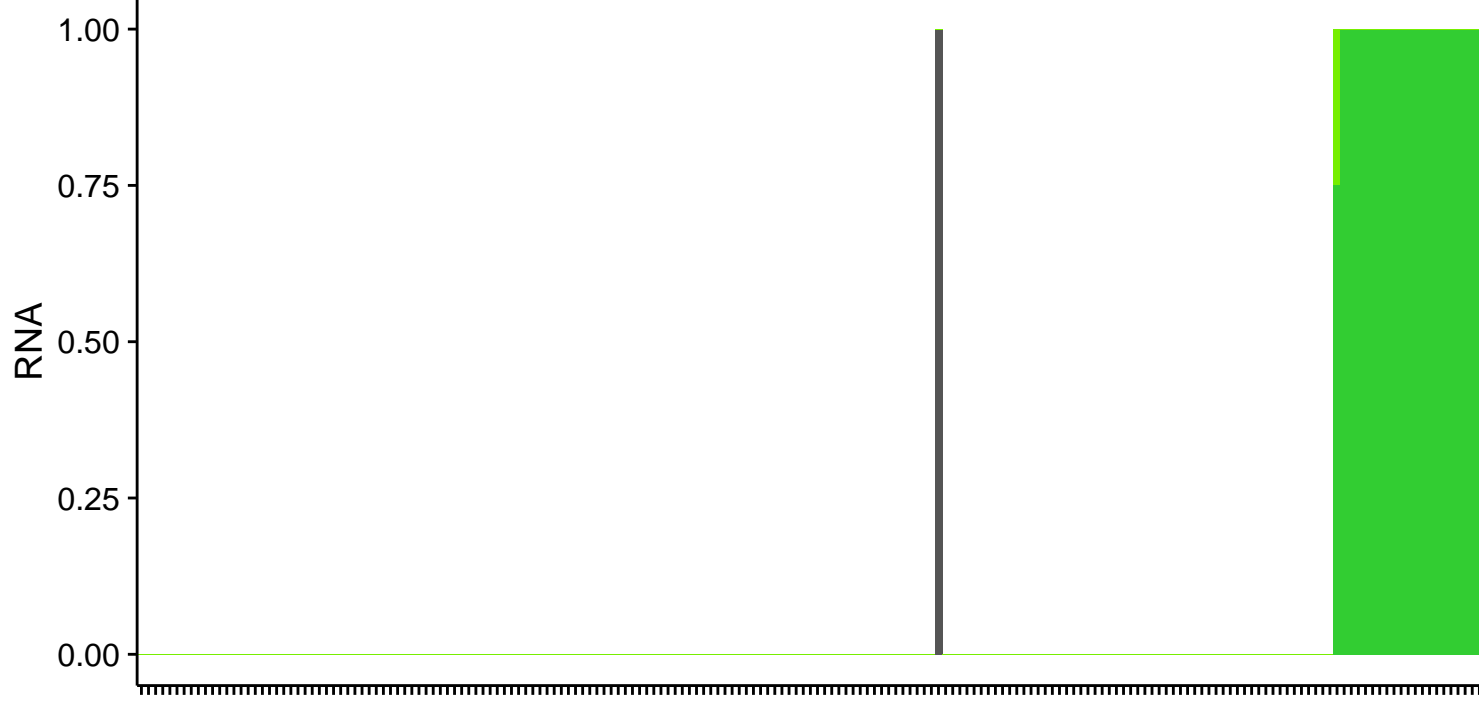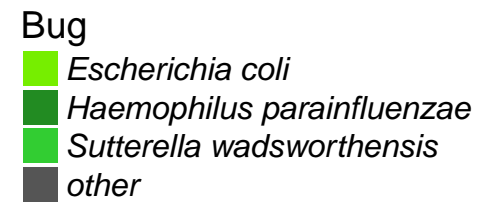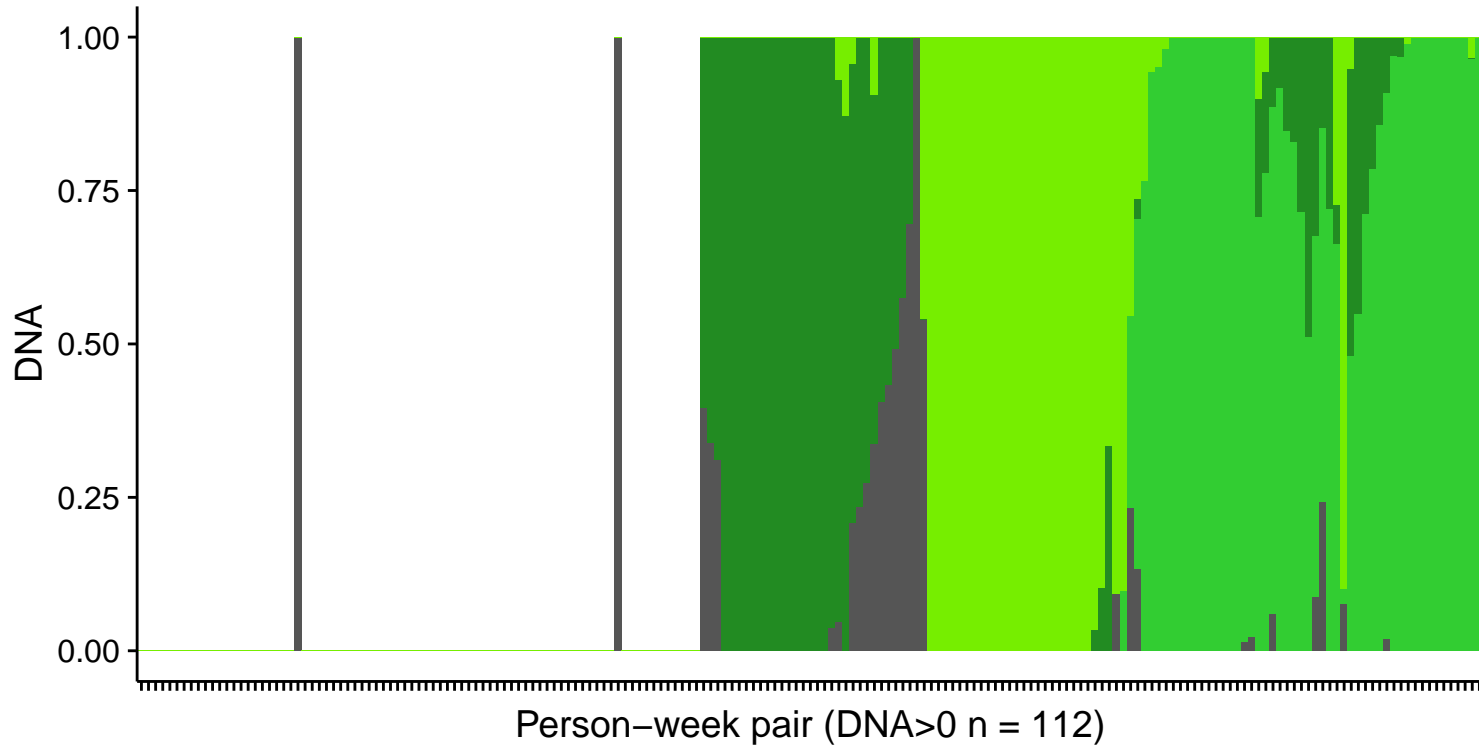

# CALVIN-PWY: Calvin-Benson-Bassham cycle

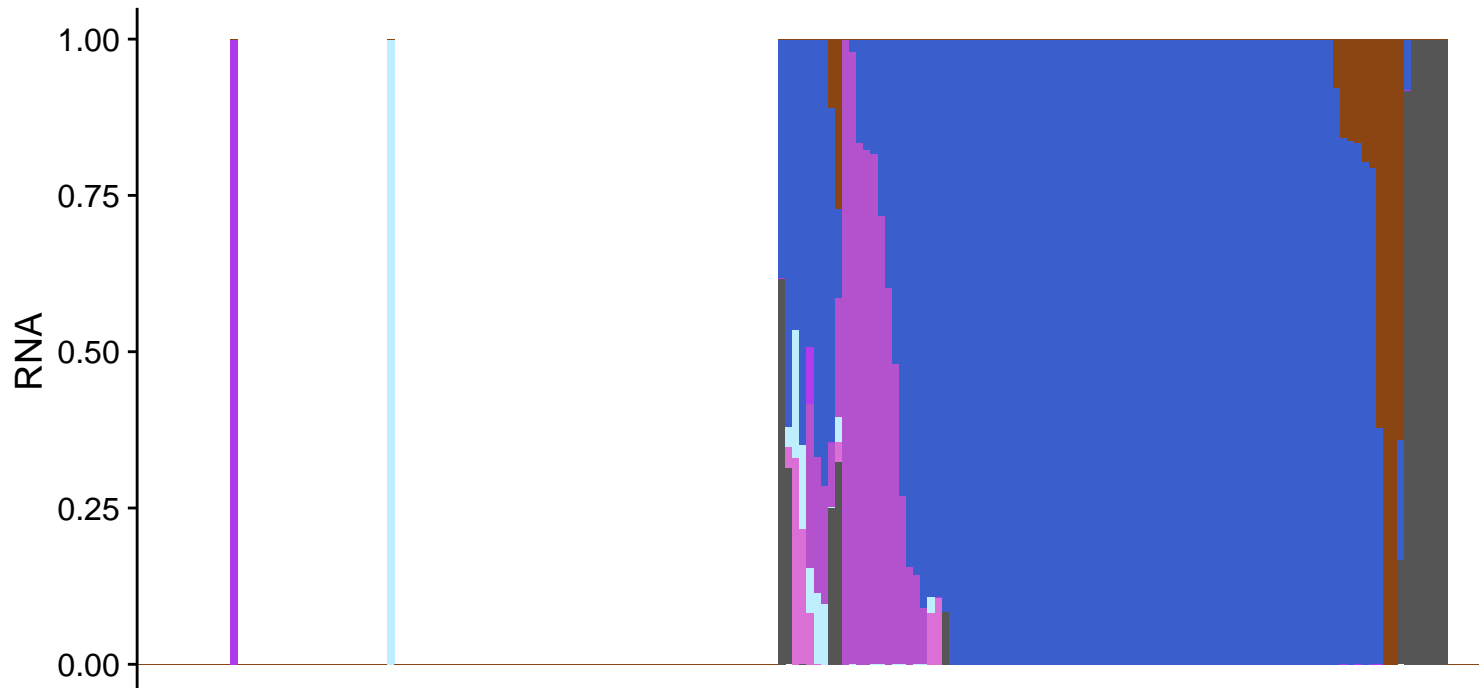

## Bug

- Odoribacter splanchnicus*
- Faecalibacterium prausnitzii*
- Ruminococcus torques*
- Ruminococcus bromii*
- Anaerostipes hadrus*
- Lachnospiraceae bacterium 5 1 63FAA*
- Escherichia coli*
- Klebsiella pneumoniae*
- other

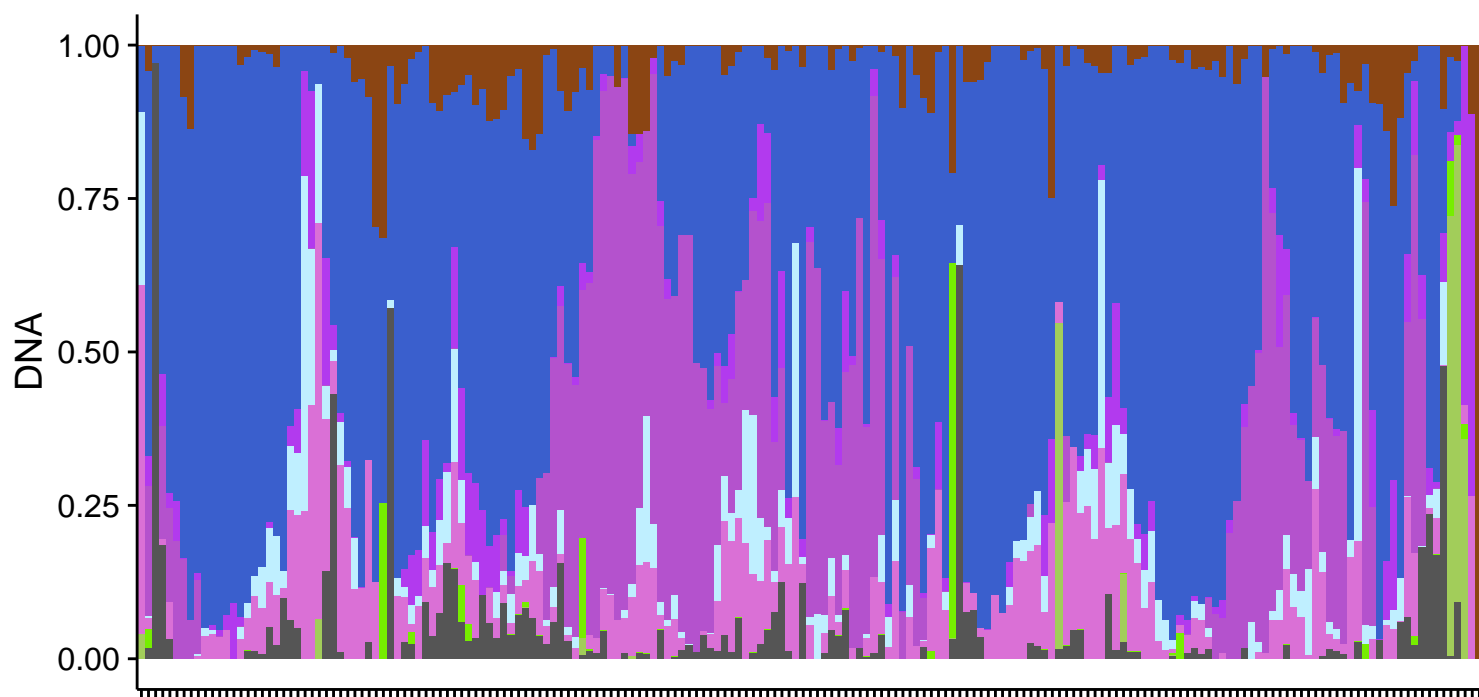

Person-week pair (DNA>0 n = 189)



# PYRIDNUCSYN-PWY: NAD biosynthesis I (from aspartate)

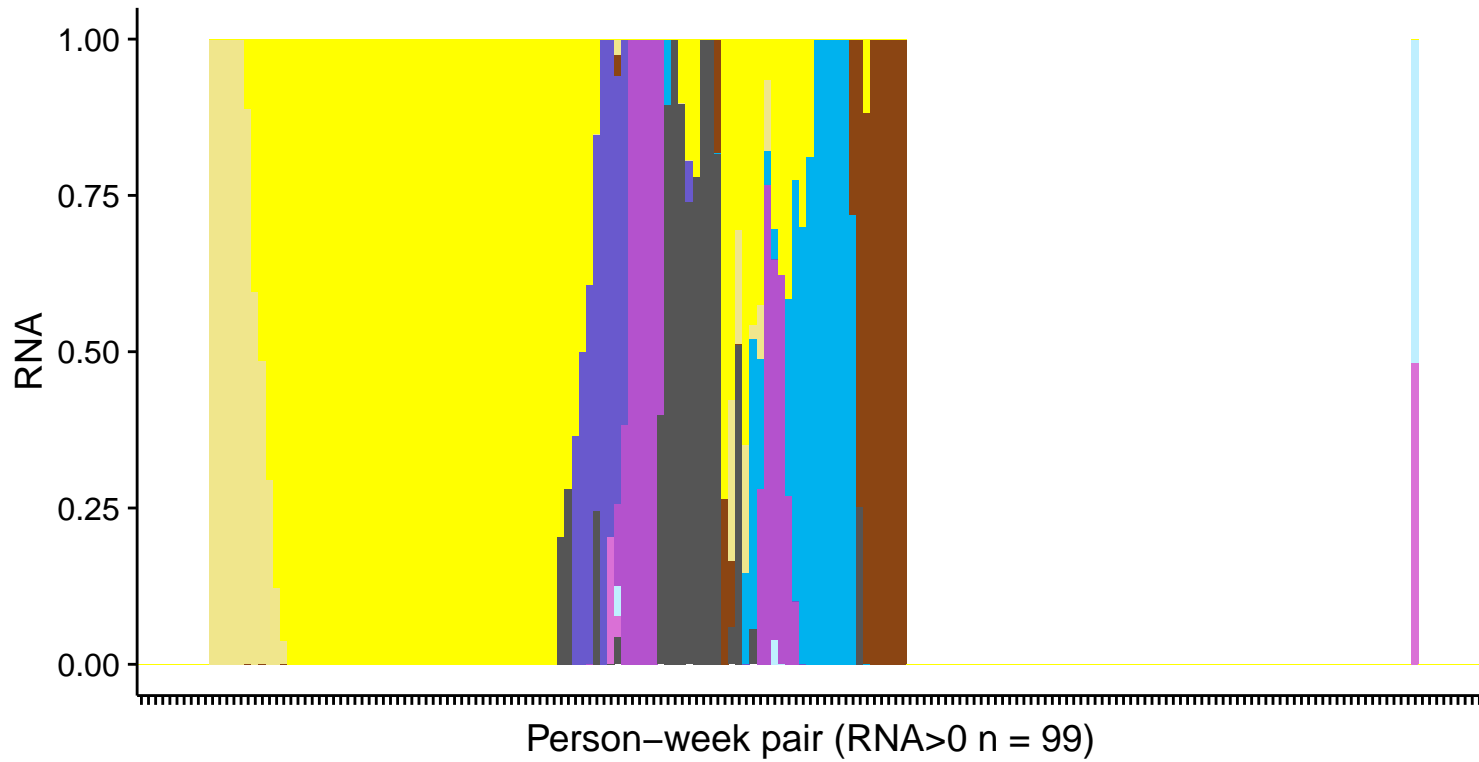

## Bug

- Alistipes shahii*
- Alistipes finegoldii*
- Odoribacter splanchnicus*
- Eubacterium siraeum*
- Roseburia intestinalis*
- Ruminococcus bromii*
- Anaerostipes hadrus*
- Lachnospiraceae bacterium 5\_1\_63FAA*
- Escherichia coli*
- other

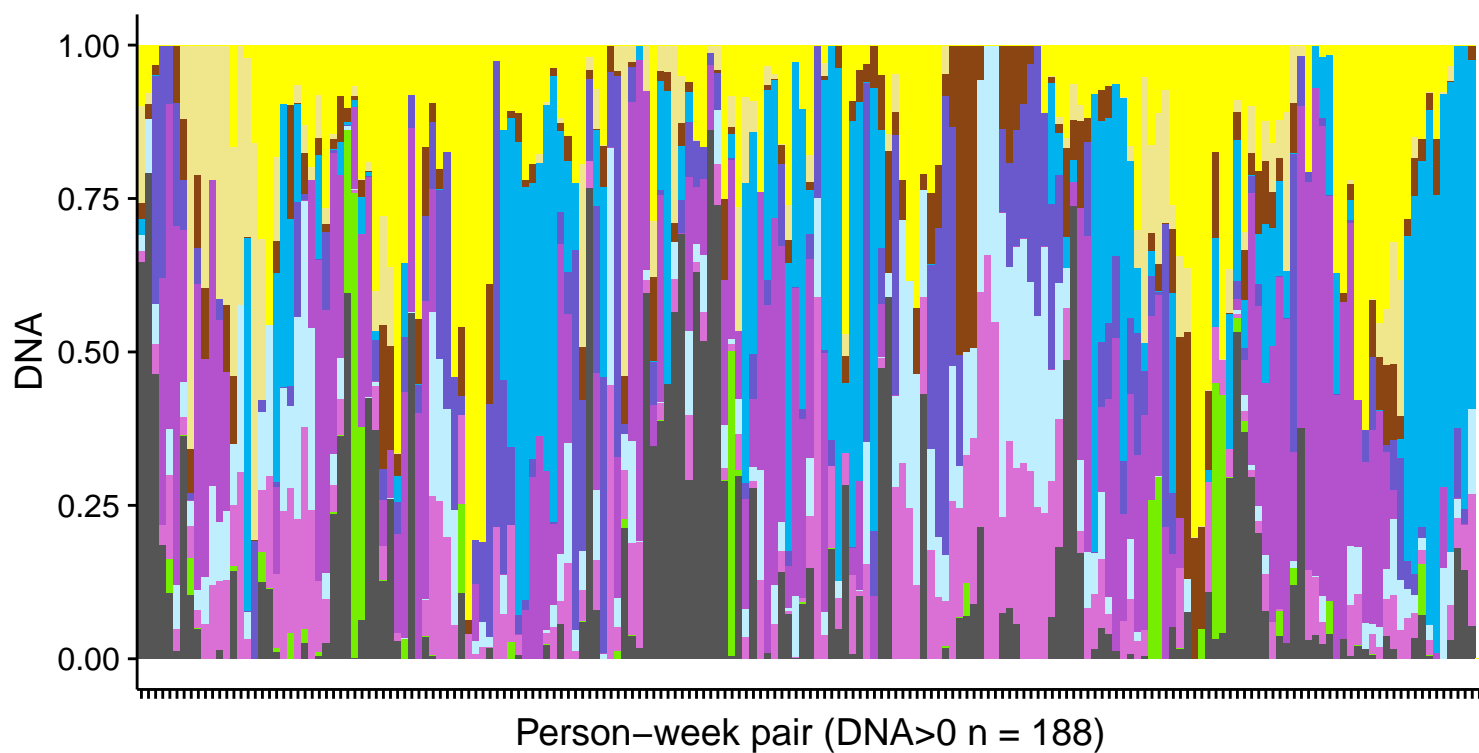

# PWY-6123: inosine-5'-phosphate biosynthesis I

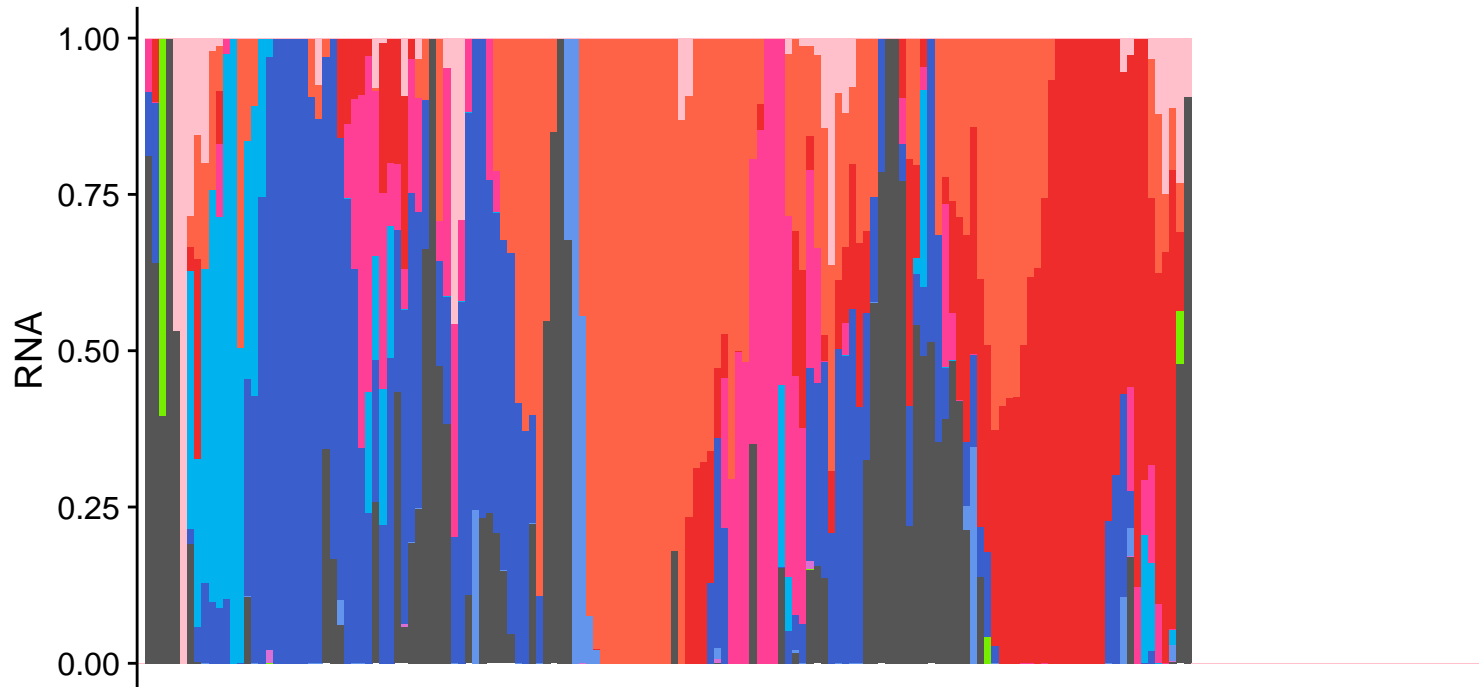

## Bug

- Bacteroides fragilis*
- Bacteroides ovatus*
- Bacteroides thetaiotaomicron*
- Bacteroides xylanisolvens*
- Eubacterium siraeum*
- Faecalibacterium prausnitzii*
- Streptococcus salivarius*
- Lachnospiraceae bacterium 5 1 63FAA*
- Escherichia coli*
- Klebsiella pneumoniae*
- Haemophilus parainfluenzae*
- other

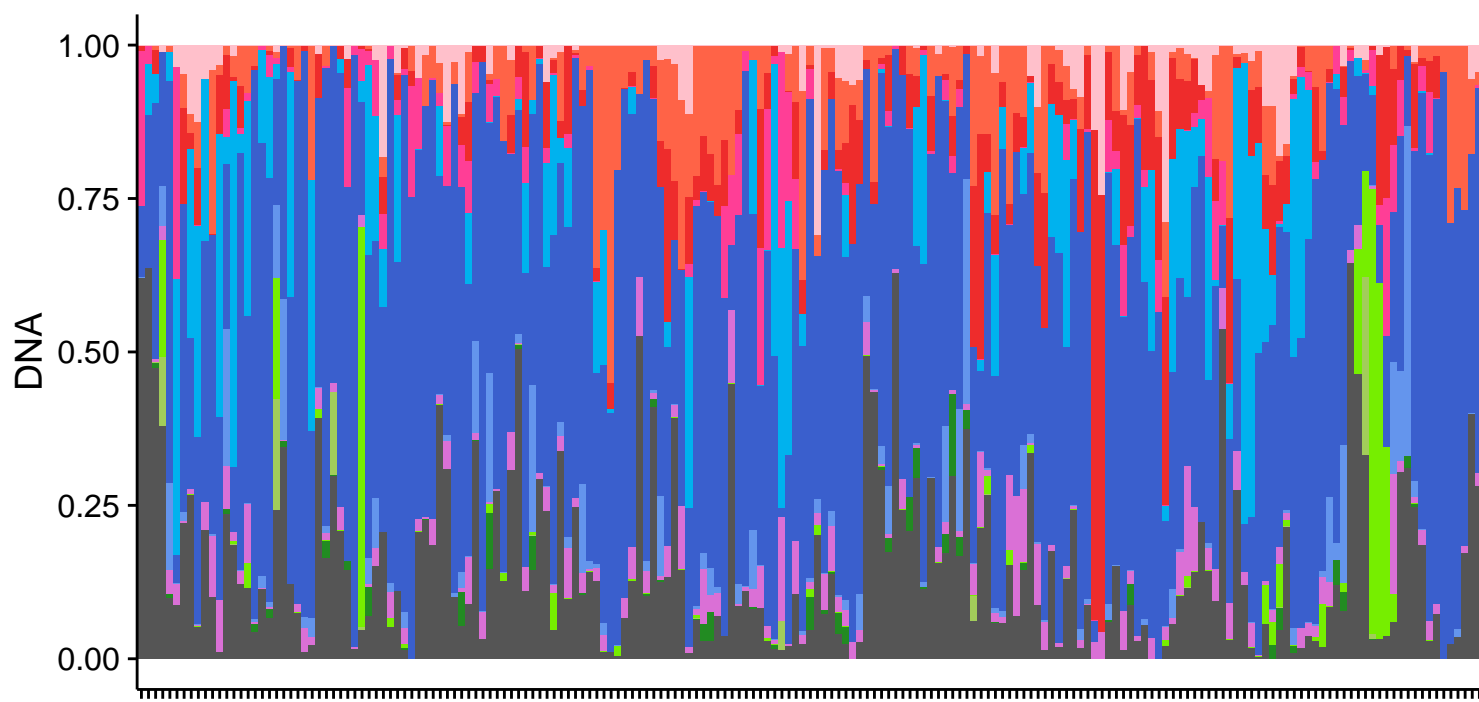

# GALACTUROCAT-PWY: D-galacturonate degradation I

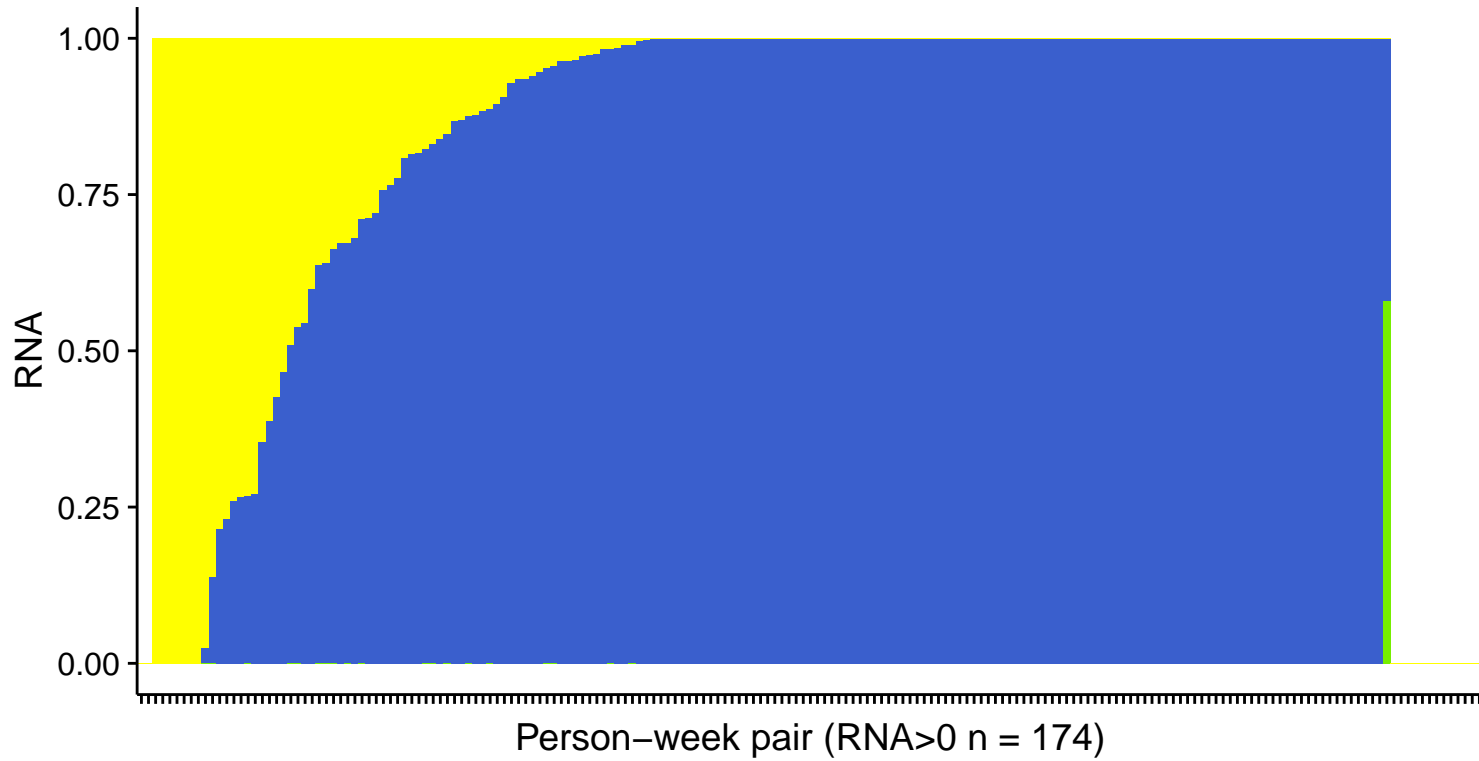

## Bug

- Alistipes shahii*
- Faecalibacterium prausnitzii*
- Escherichia coli*
- other

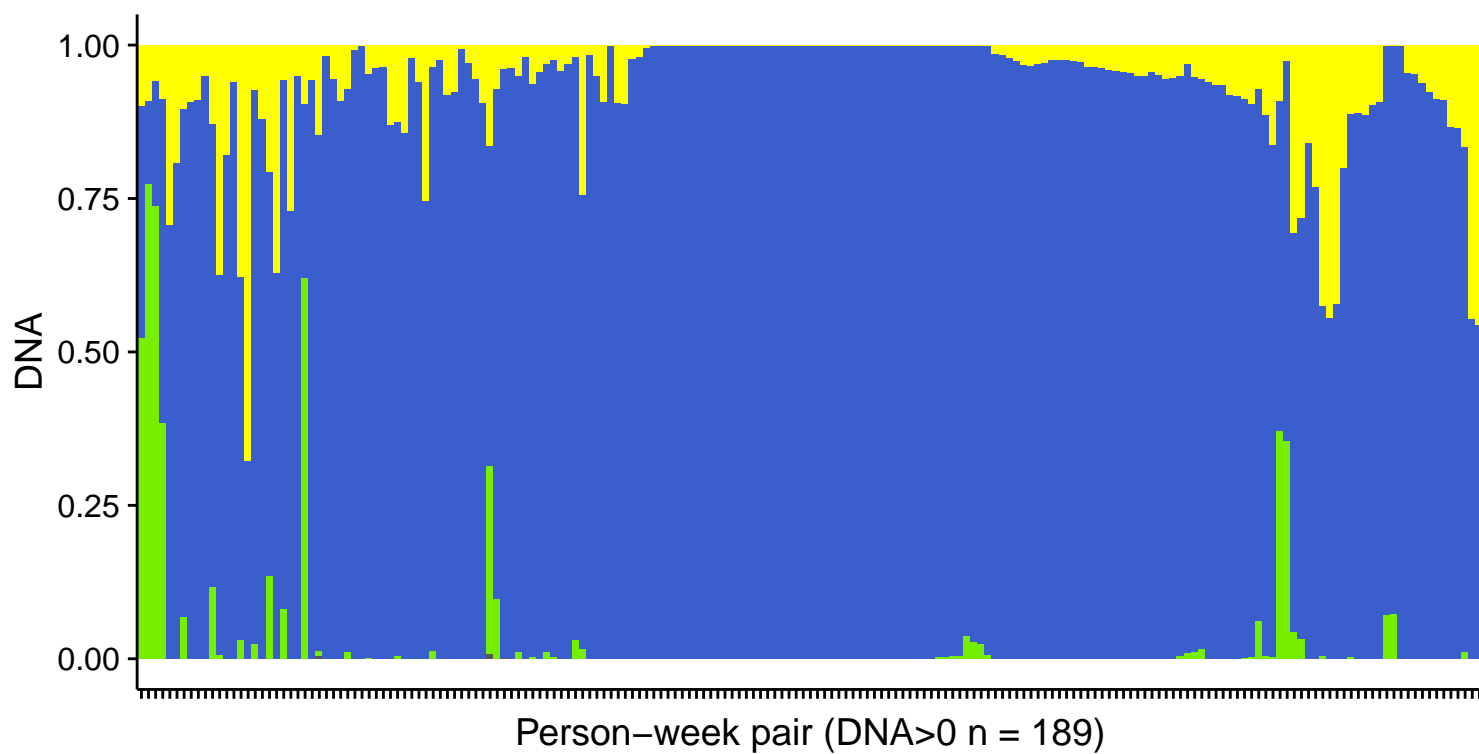

# PWY-5367: petroselinate biosynthesis

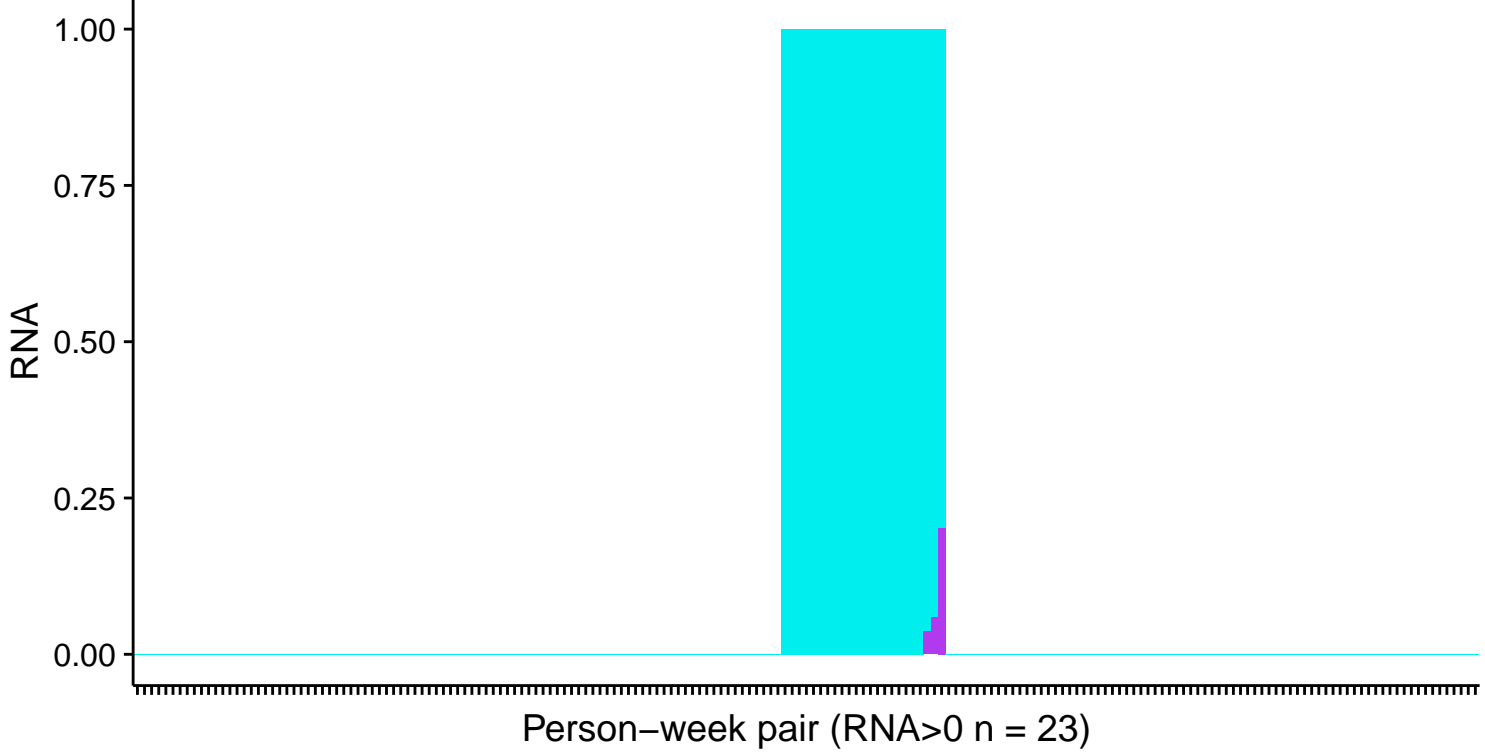

Bug

- Eubacterium rectale*
- Ruminococcus torques*
- other

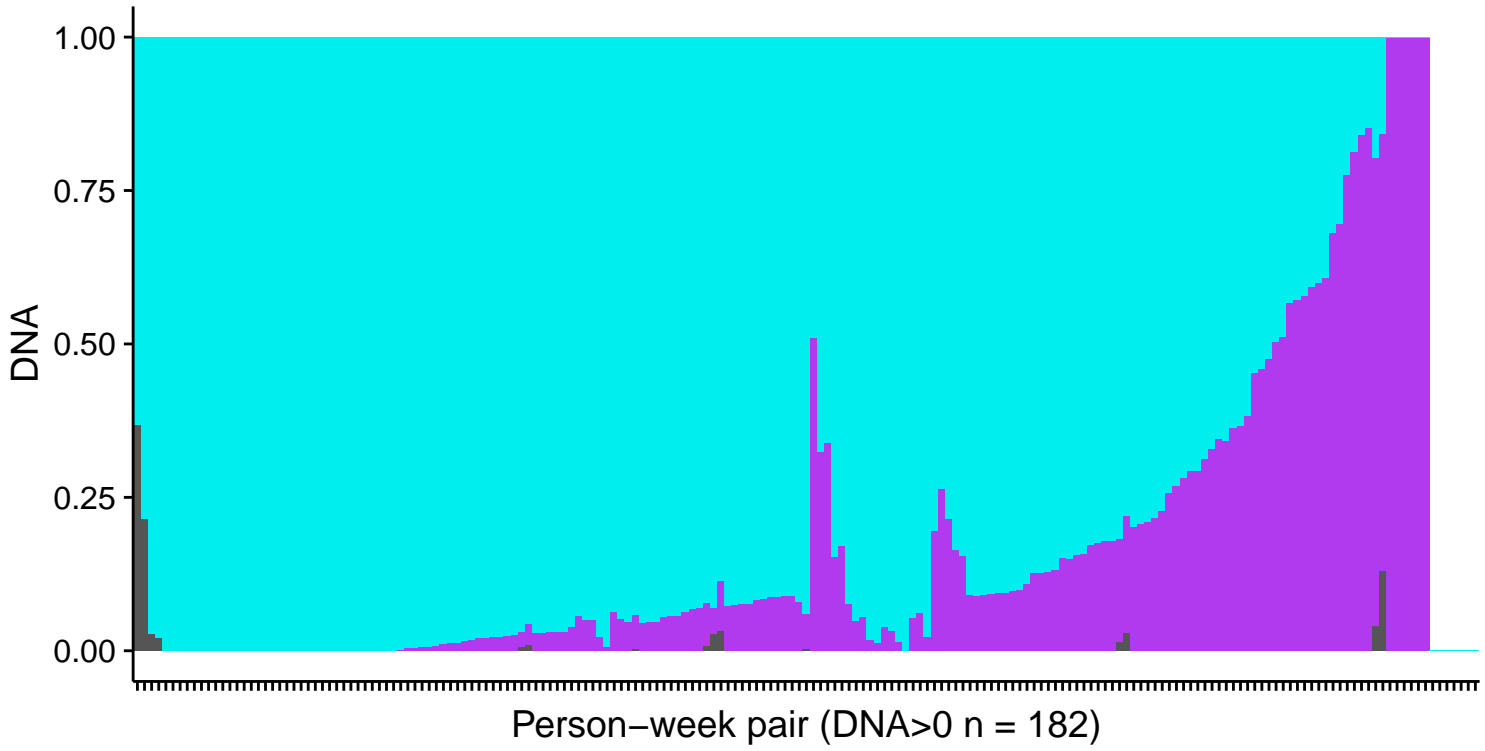

# PWY0-1296: purine ribonucleosides degradation

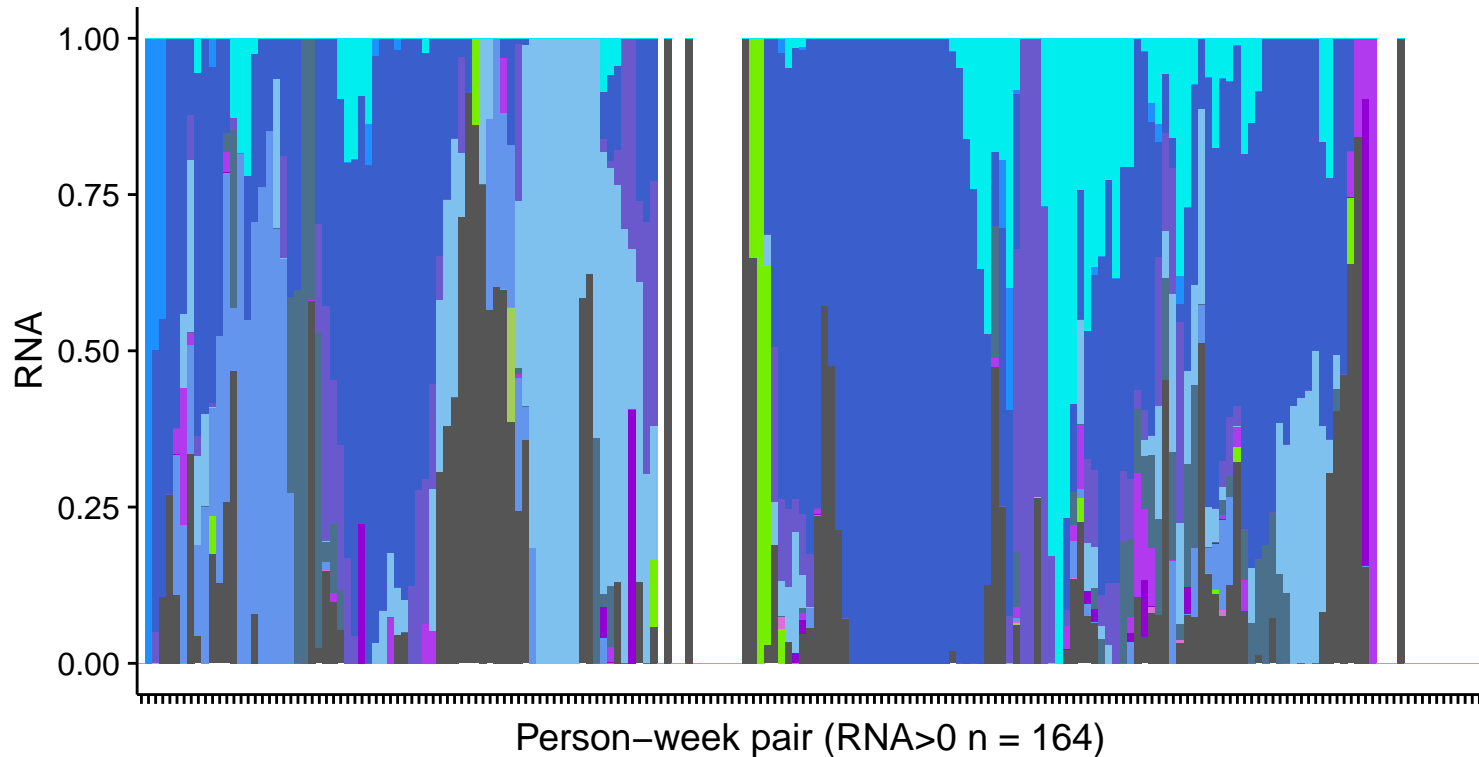

## Bug

- Eubacterium rectale*
- Eubacterium eligens*
- Faecalibacterium prausnitzii*
- Roseburia intestinalis*
- Roseburia hominis*
- Roseburia inulinivorans*
- Ruminococcus torques*
- Ruminococcus obeum*
- Streptococcus salivarius*
- Lachnospiraceae bacterium 5\_1\_63FAA*
- Escherichia coli*
- Klebsiella pneumoniae*
- other

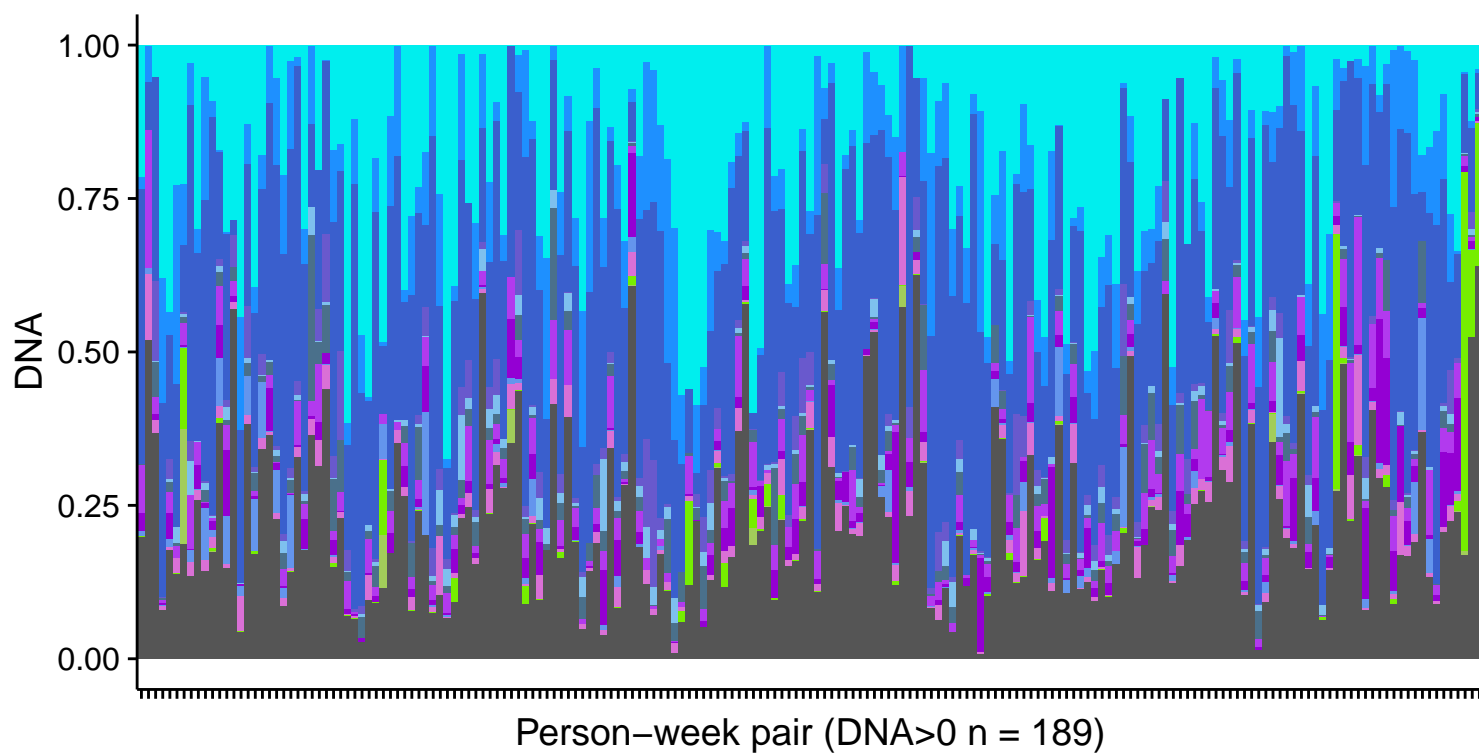

PWY66-422: D-galactose degradation V (Leloir pathway)

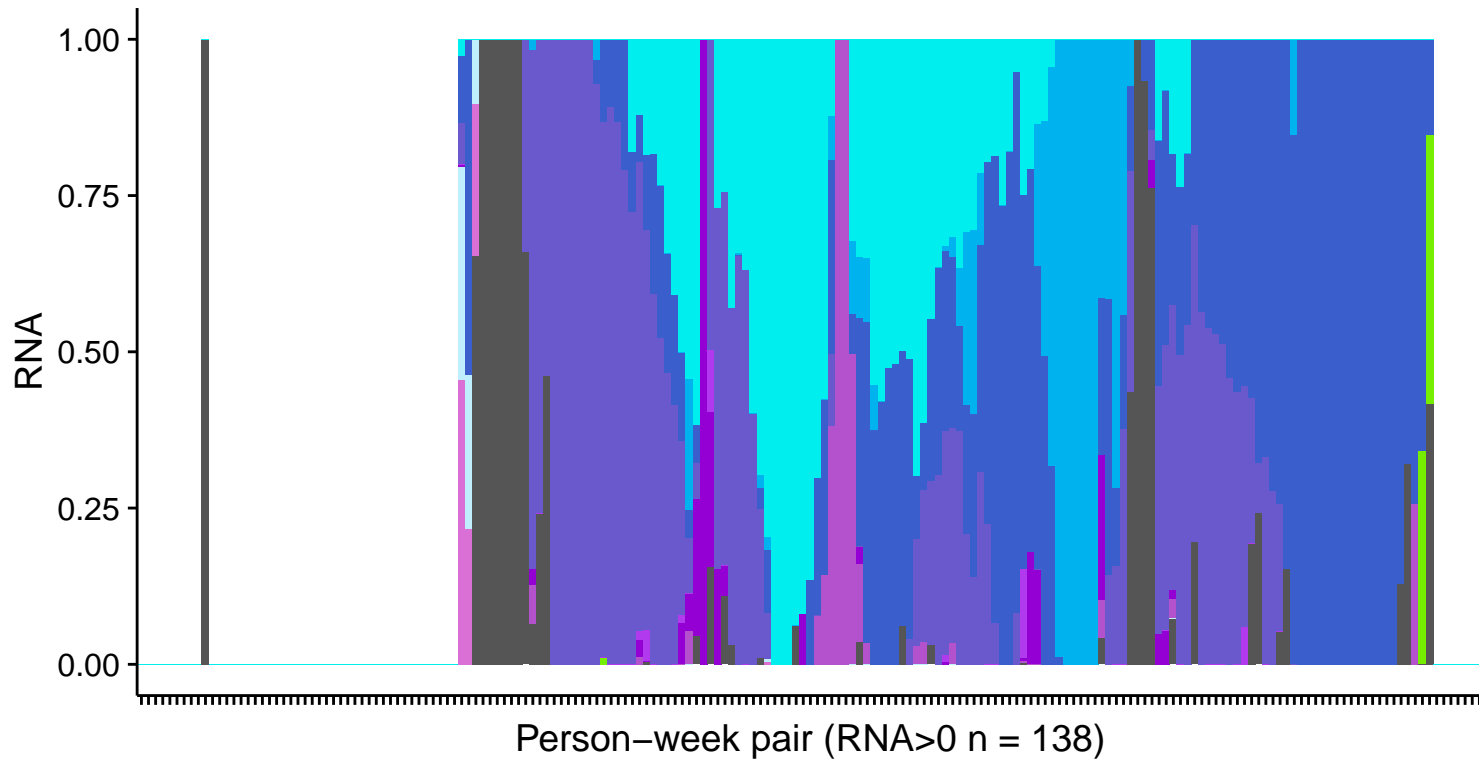

Bug

- █ *Eubacterium rectale*
- █ *Eubacterium siraeum*
- █ *Faecalibacterium prausnitzii*
- █ *Roseburia intestinalis*
- █ *Ruminococcus torques*
- █ *Ruminococcus obeum*
- █ *Ruminococcus bromii*
- █ *Anaerostipes hadrus*
- █ *Lachnospiraceae bacterium 5\_1\_63FAA*
- █ *Escherichia coli*
- █ *other*

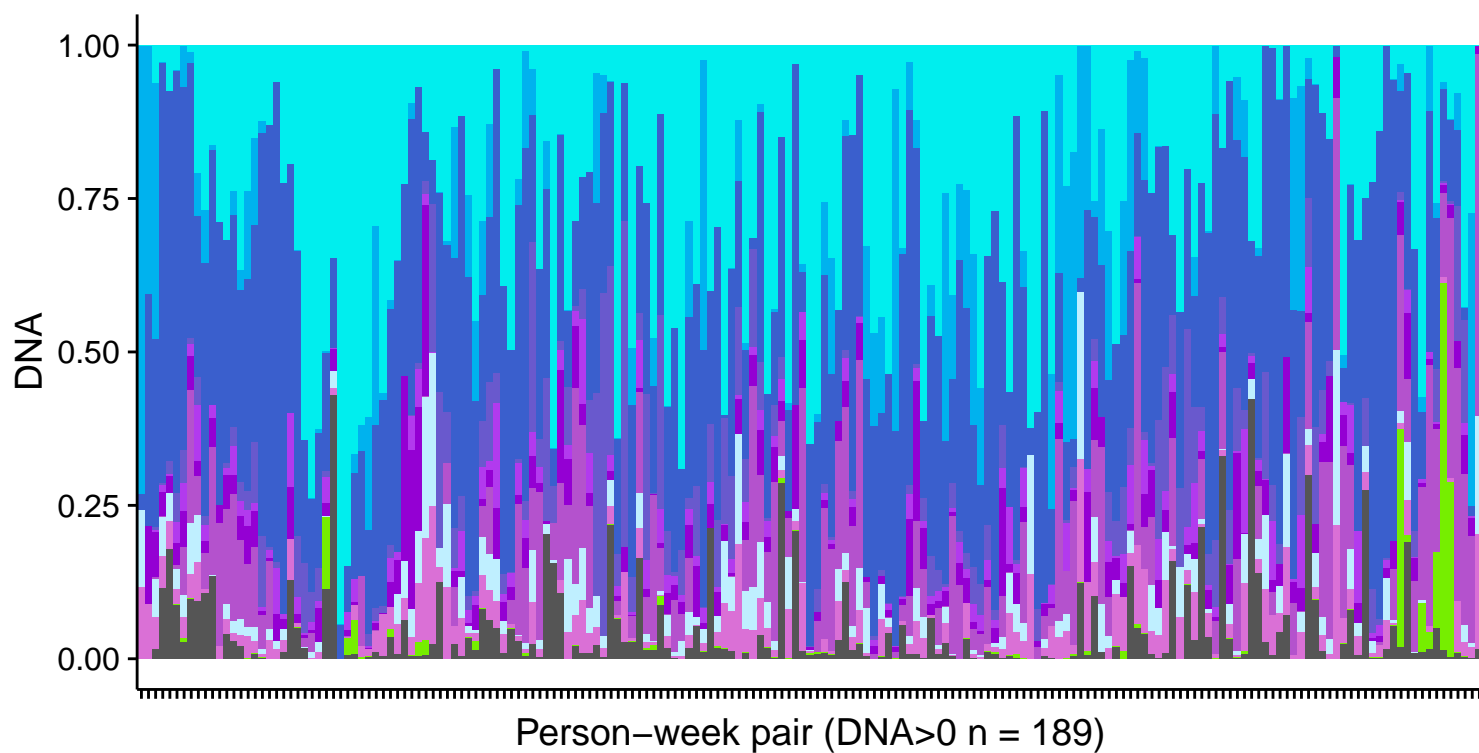



PWY-6386: UDP-N-acetylmuramoyl-pentapeptide biosynthesis II (lysine-containing)

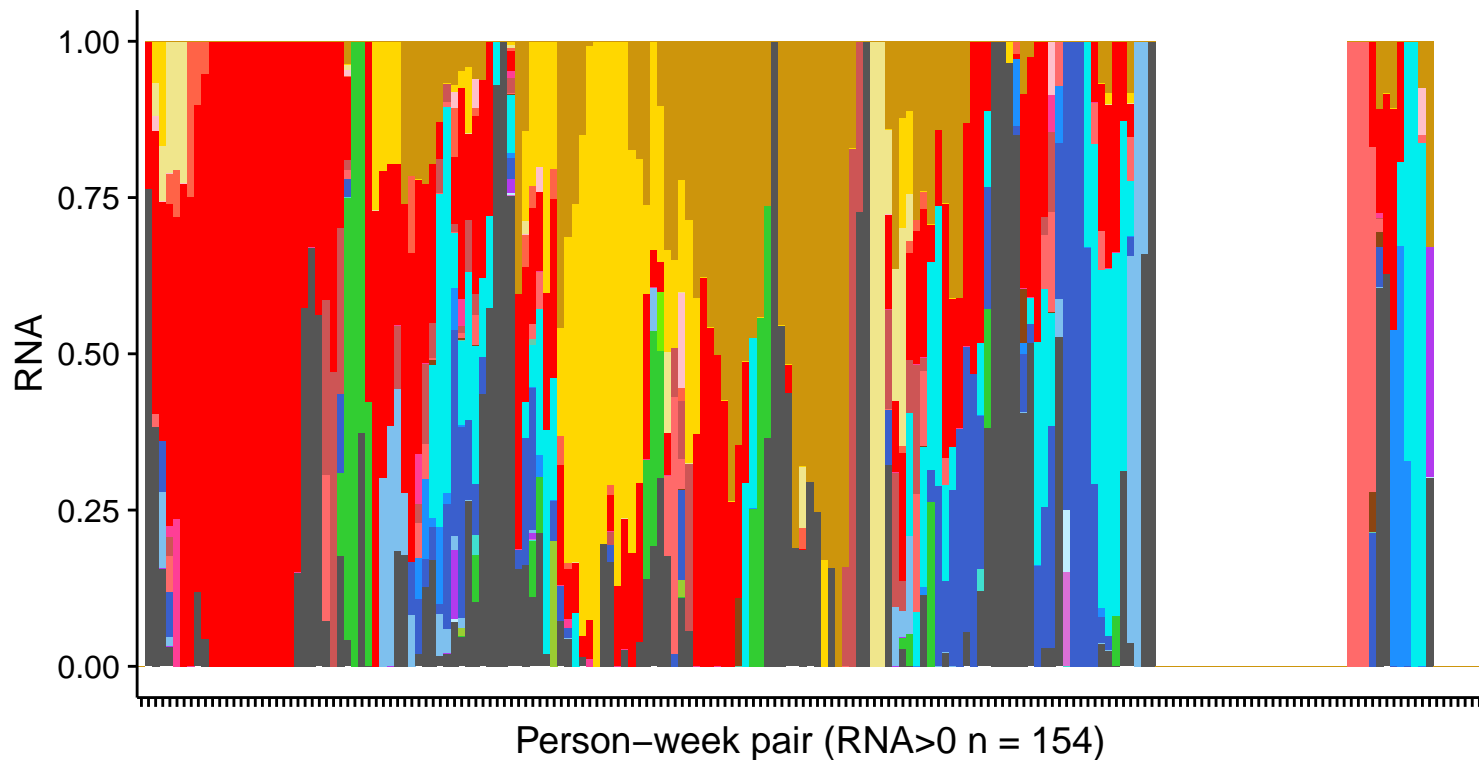

Bug

- Alistipes putredinis*
- Alistipes onderdonkii*
- Alistipes finegoldii*
- Bacteroides fragilis*
- Bacteroides ovatus*
- Bacteroides uniformis*
- Bacteroides xylanisolvens*
- Parabacteroides merdae*
- Parabacteroides distasonis*
- Odoribacter splanchnicus*
- Coprococcus comes*
- Eubacterium rectale*
- Eubacterium eligens*
- Faecalibacterium prausnitzii*
- Roseburia hominis*
- Ruminococcus torques*
- Ruminococcus obeum*
- Streptococcus salivarius*
- Anaerostipes hadrus*
- Lachnospiraceae bacterium 5\_1\_63FAA*
- Phascolarctobacterium succinatutens*
- Rothia mucilaginosa*
- Escherichia coli*
- Haemophilus parainfluenzae*
- Bilophila wadsworthia*
- Sutterella wadsworthensis*
- other

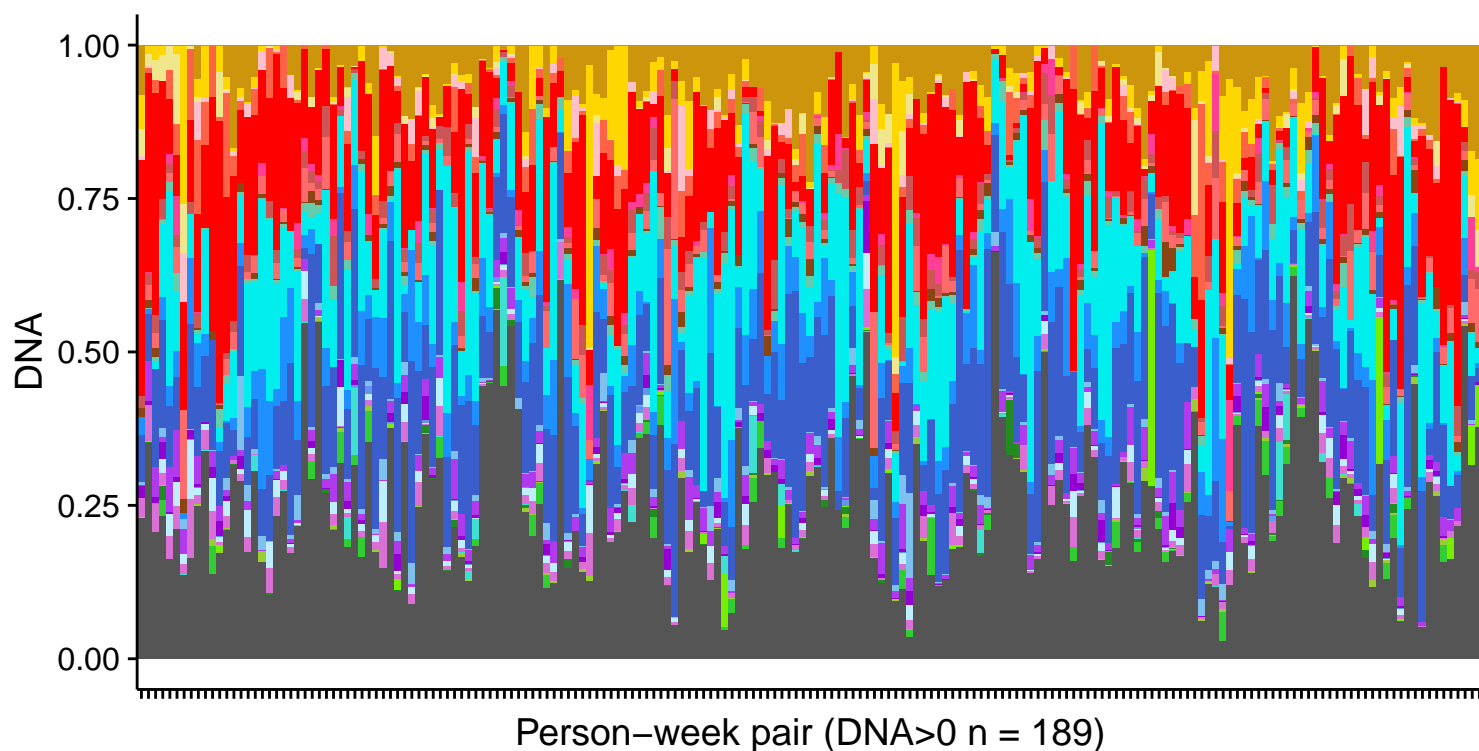



# UDPNAGSYN-PWY: UDP-N-acetyl-D-glucosamine biosynthesis I

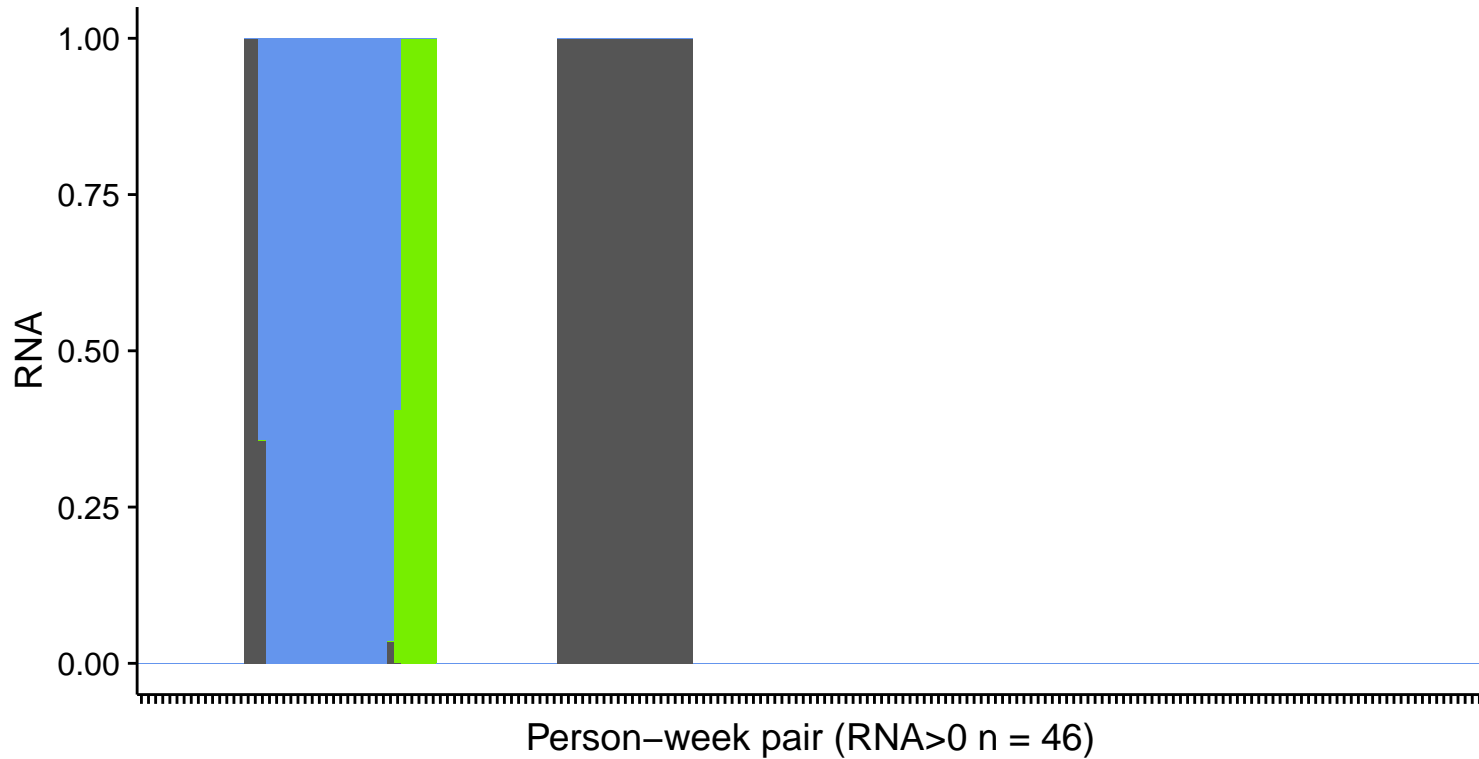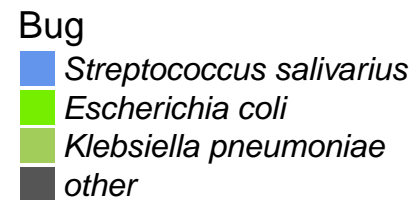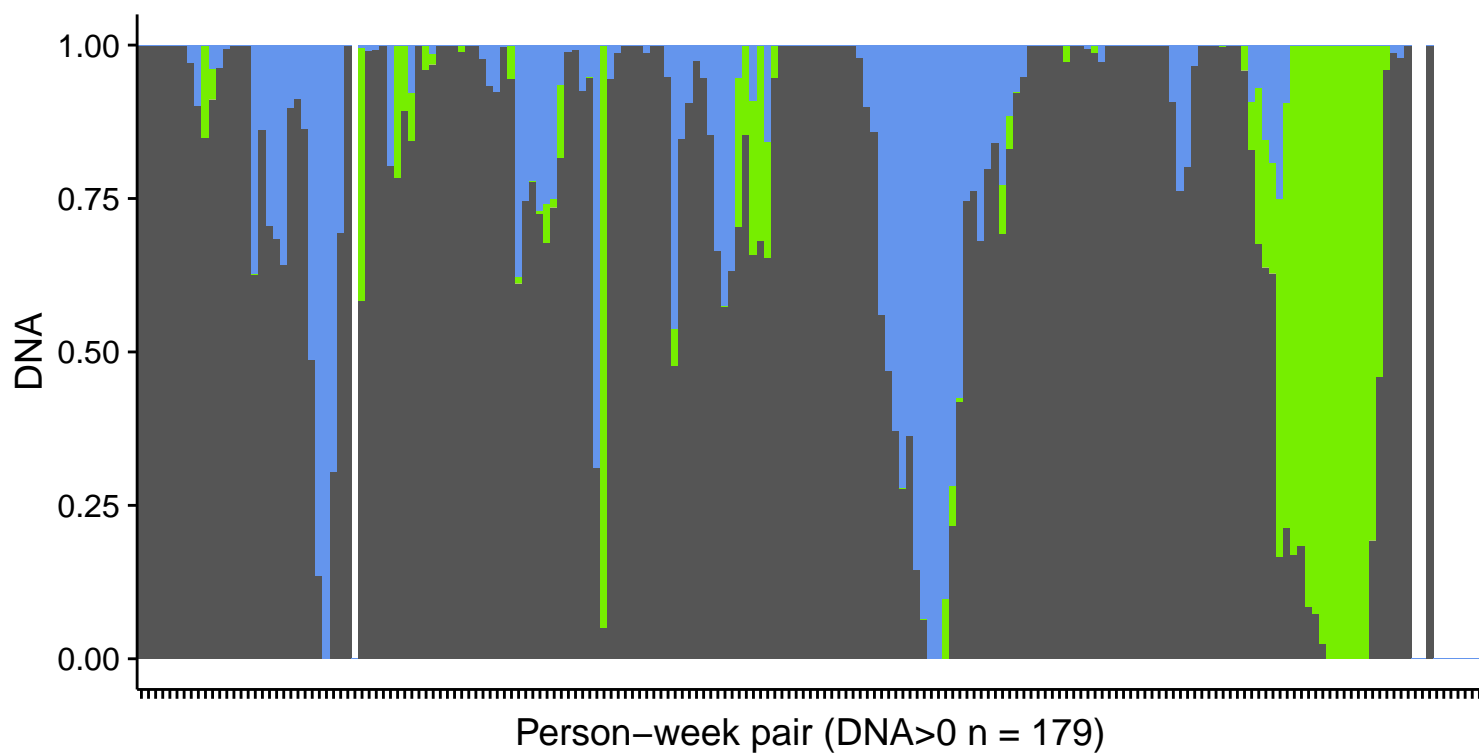

# PWY-7199: pyrimidine deoxyribonucleosides salvage

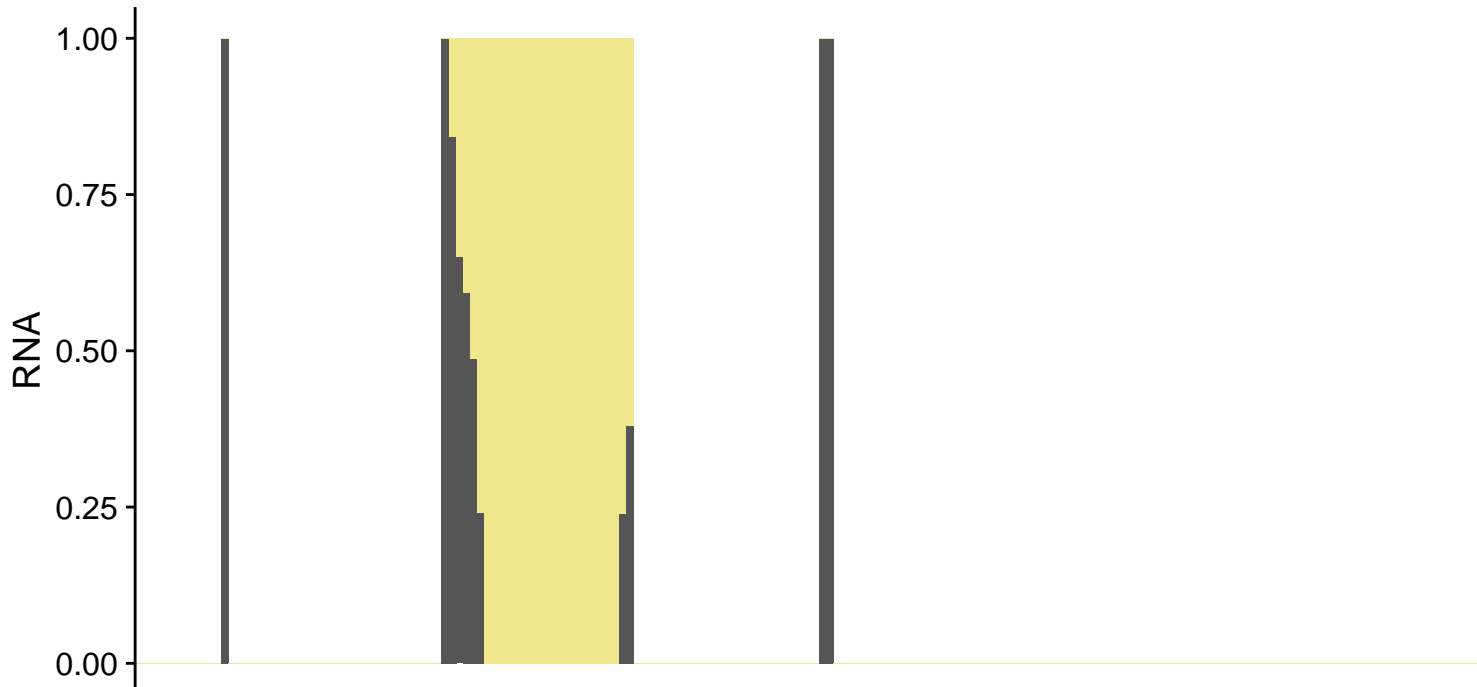

Person-week pair (RNA>0 n = 30)

## Bug

- Alistipes finegoldii*
- Escherichia coli*
- Klebsiella pneumoniae*
- Haemophilus parainfluenzae*
- other

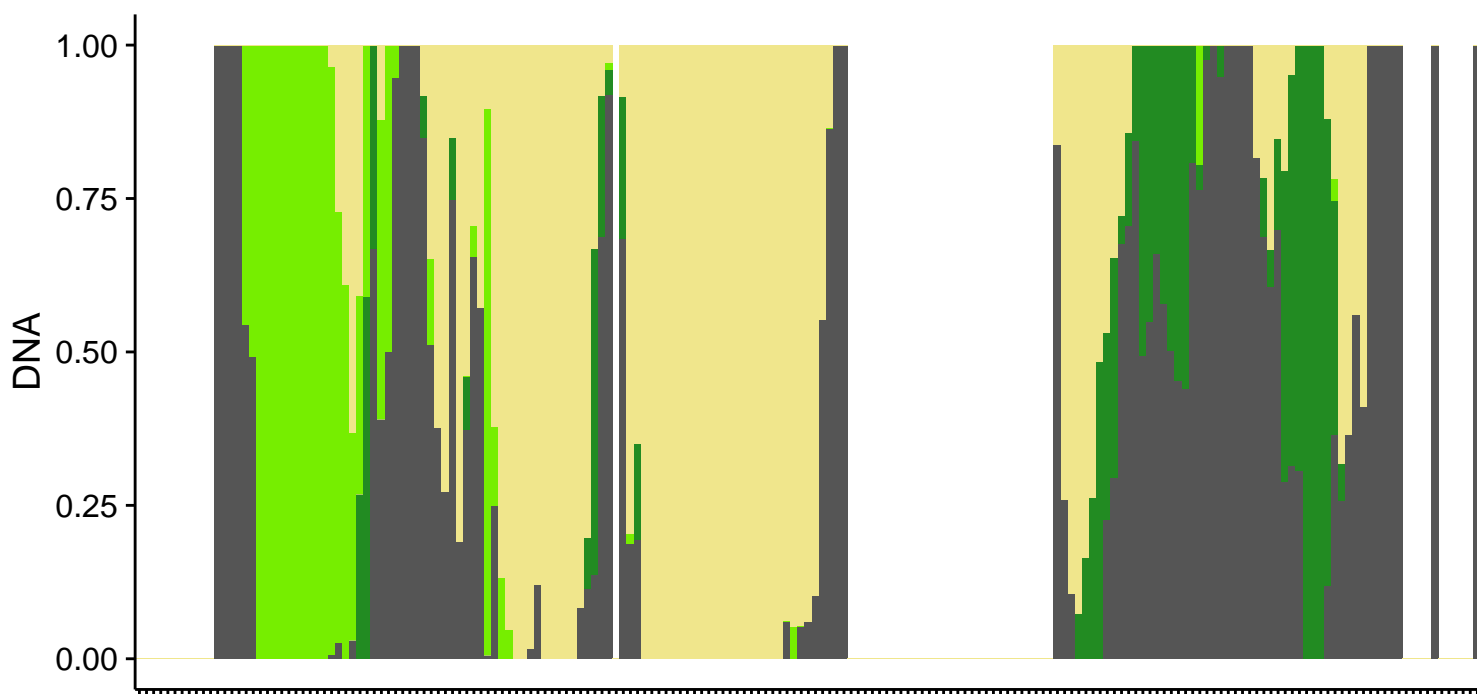

Person-week pair (DNA>0 n = 139)

# NONOXIPENT-PWY: pentose phosphate pathway (non-oxidative branch)

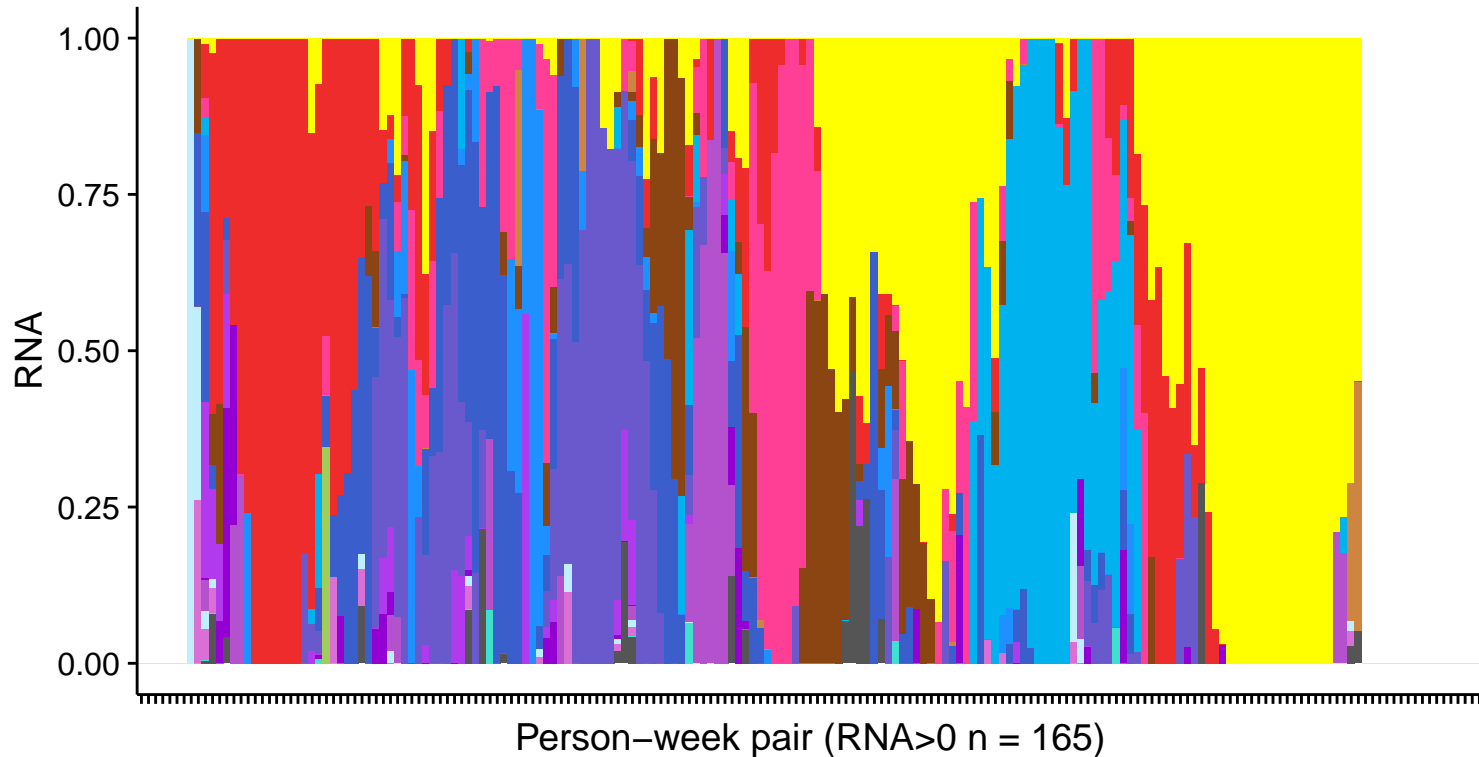

## Bug

- Alistipes shahii*
- Bacteroides thetaiotaomicron*
- Bacteroides xylanisolvens*
- Bacteroides massiliensis*
- Odoribacter splanchnicus*
- Eubacterium siraeum*
- Eubacterium eligens*
- Faecalibacterium prausnitzii*
- Roseburia intestinalis*
- Ruminococcus torques*
- Ruminococcus obeum*
- Ruminococcus bromii*
- Anaerostipes hadrus*
- Lachnospiraceae bacterium 5 1 63FAA*
- Phascolarctobacterium succinatutens*
- Escherichia coli*
- Klebsiella pneumoniae*
- other

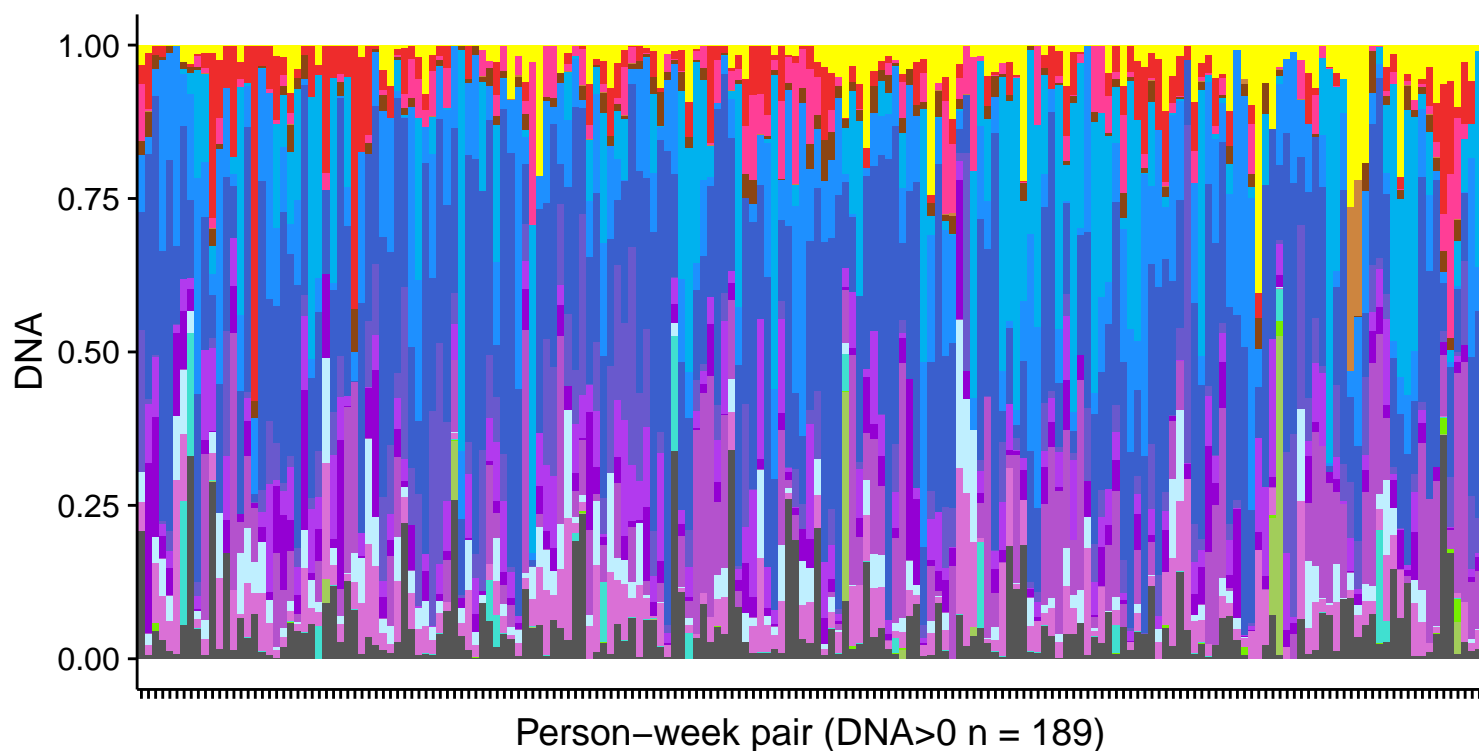

# GLUCUROCAT-PWY: superpathway of $\beta$ -D-glucuronide and D-glucuronate degradation

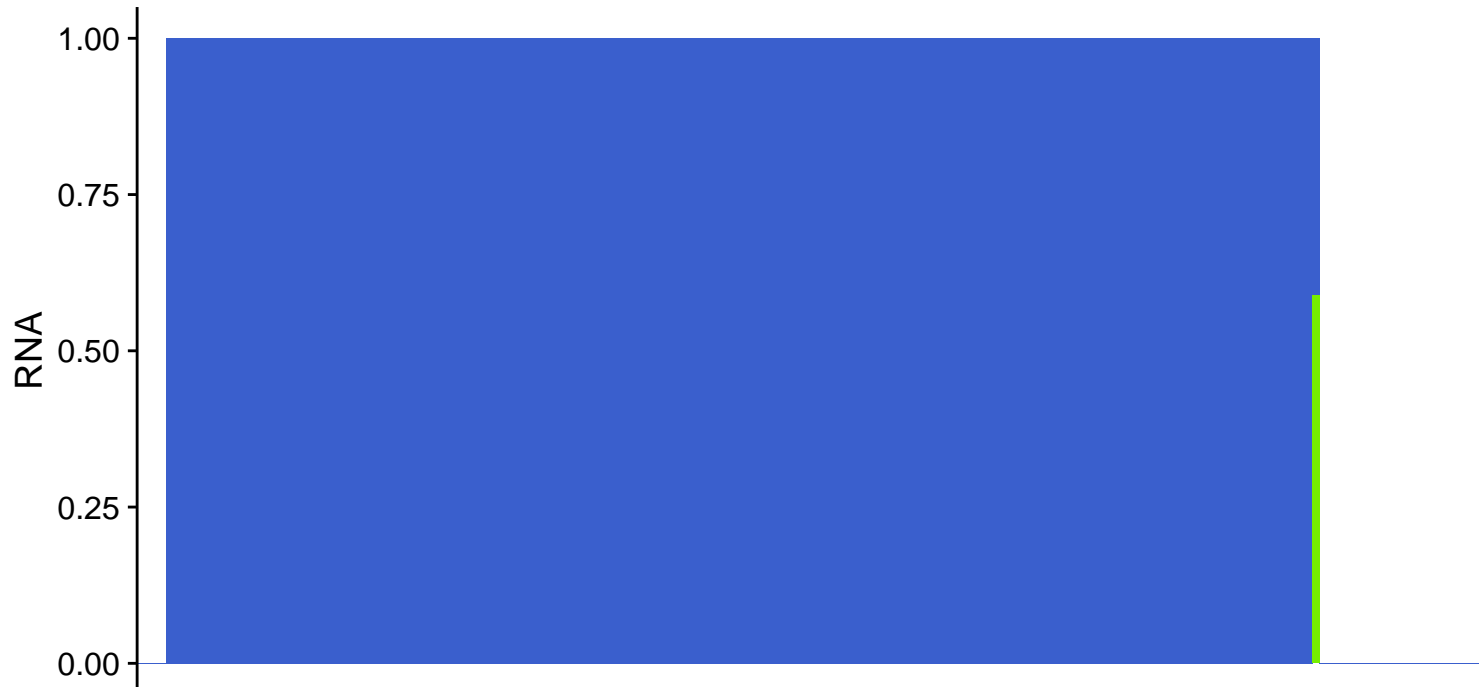

Person-week pair (RNA>0 n = 162)

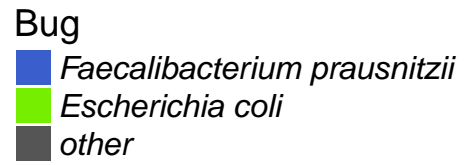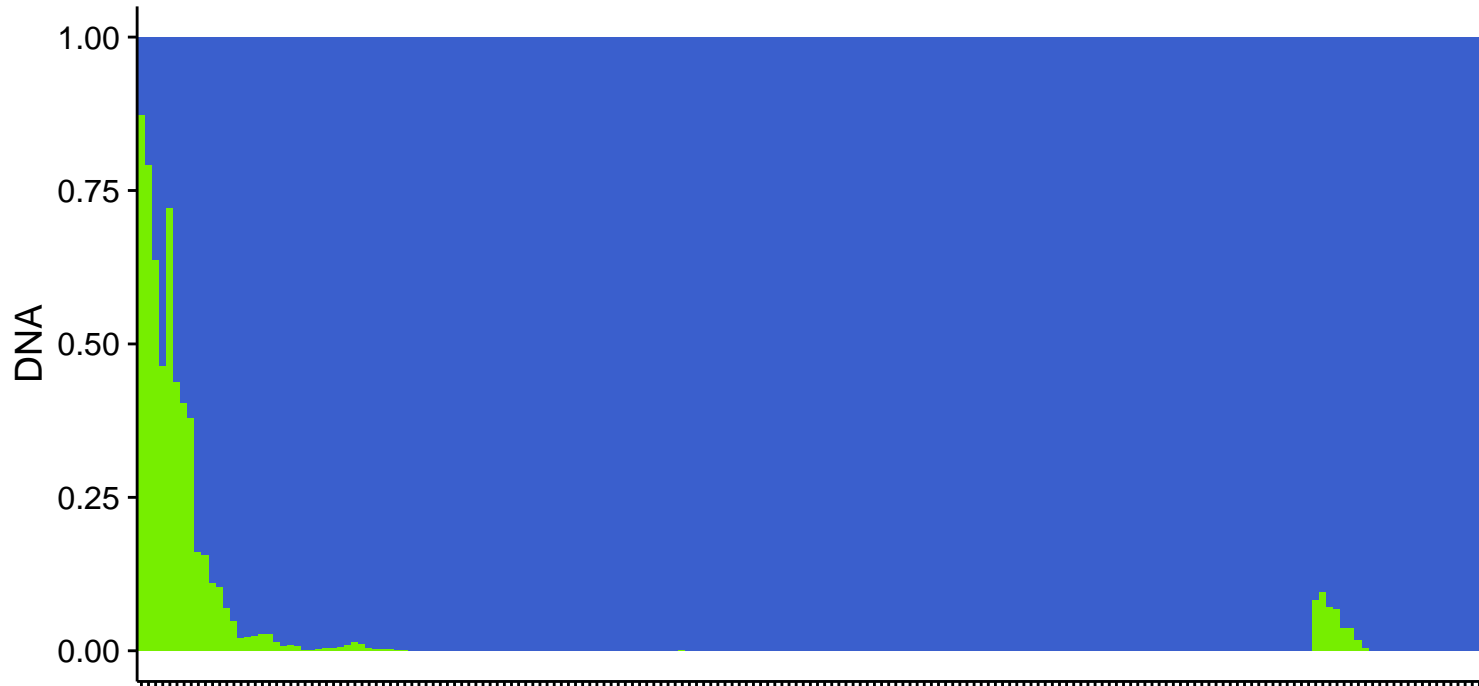

Person-week pair (DNA>0 n = 189)

# PWY-6507: 4-deoxy-L-threo-hex-4-enopyranuronate degradation

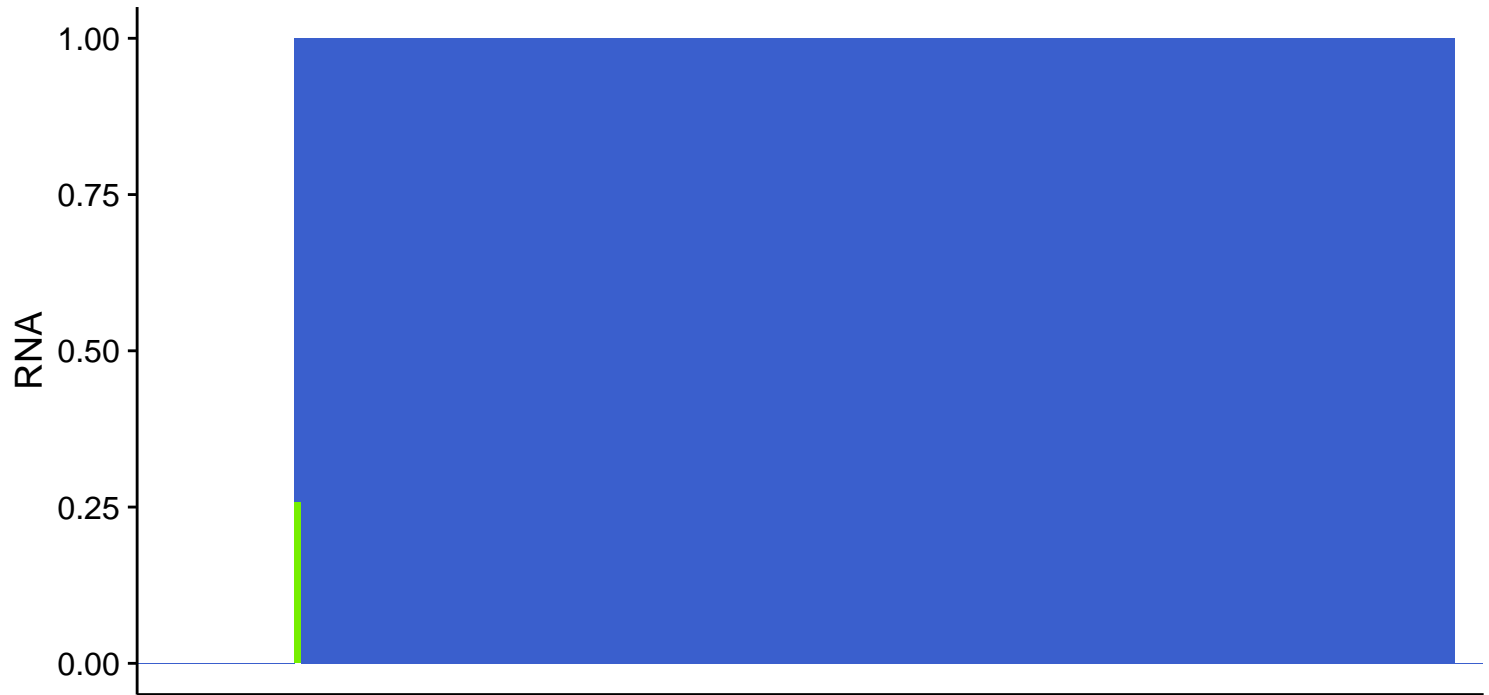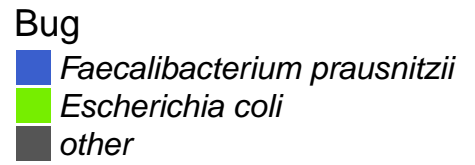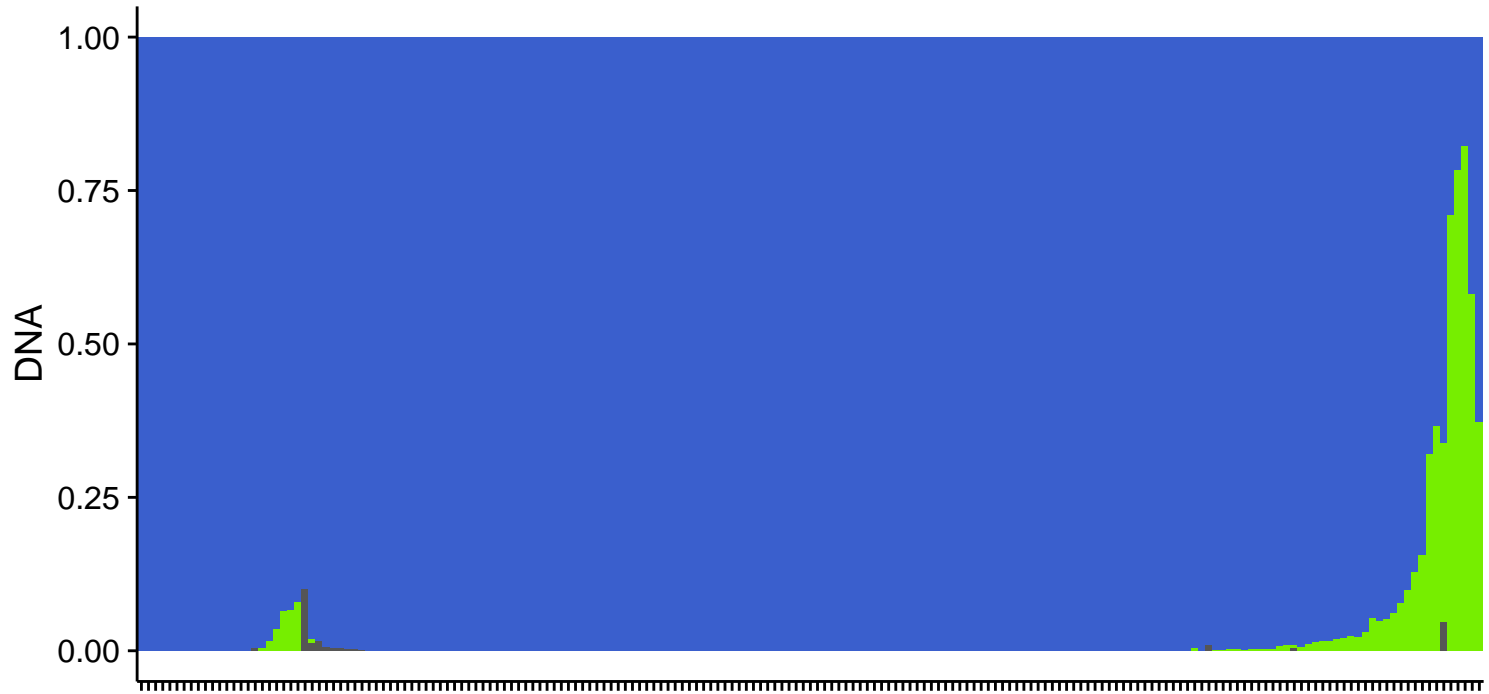

# PWY-6609: adenine and adenosine salvage III

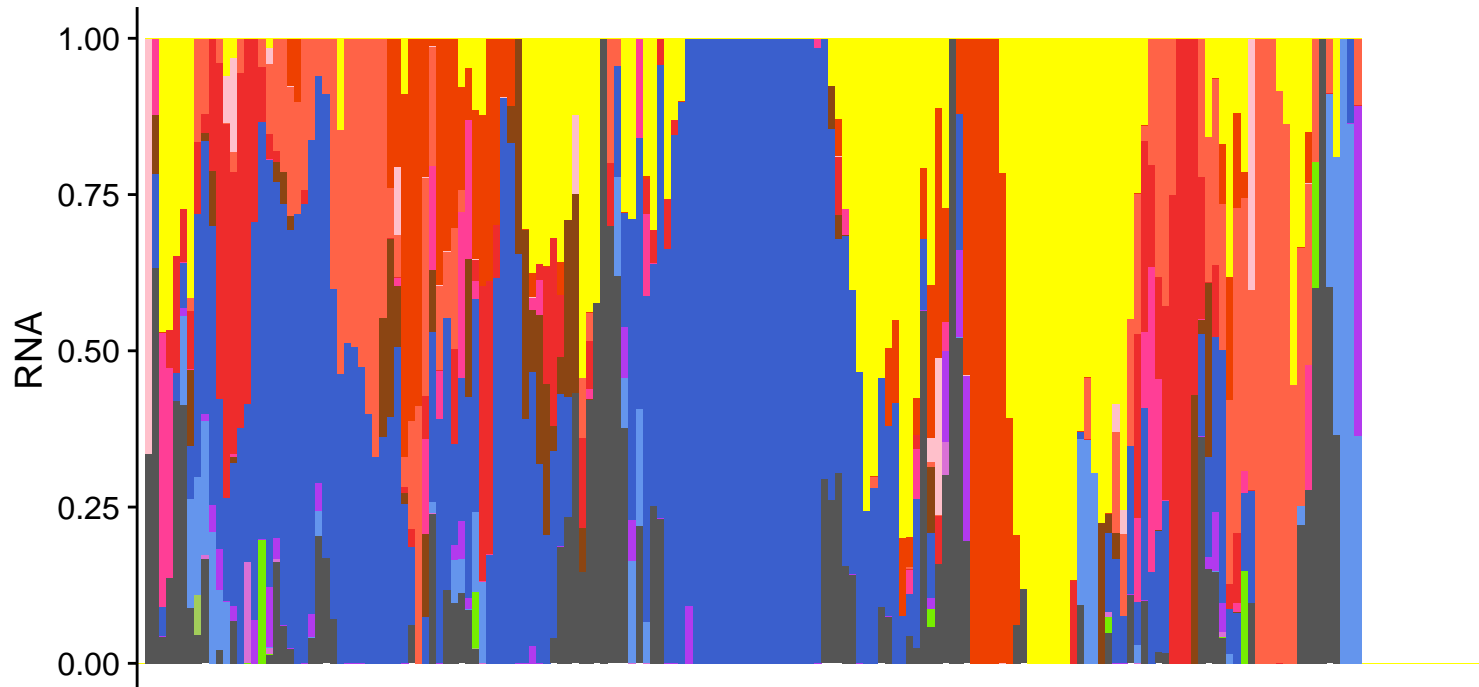

Person-week pair (RNA>0 n = 171)

## Bug

- *Alistipes shahii*
- *Bacteroides caccae*
- *Bacteroides fragilis*
- *Bacteroides ovatus*
- *Bacteroides thetaiotaomicron*
- *Bacteroides xylanisolvens*
- *Odoribacter splanchnicus*
- *Faecalibacterium prausnitzii*
- *Ruminococcus torques*
- *Streptococcus salivarius*
- *Lachnospiraceae bacterium 5\_1\_63FAA*
- *Escherichia coli*
- *Klebsiella pneumoniae*
- other

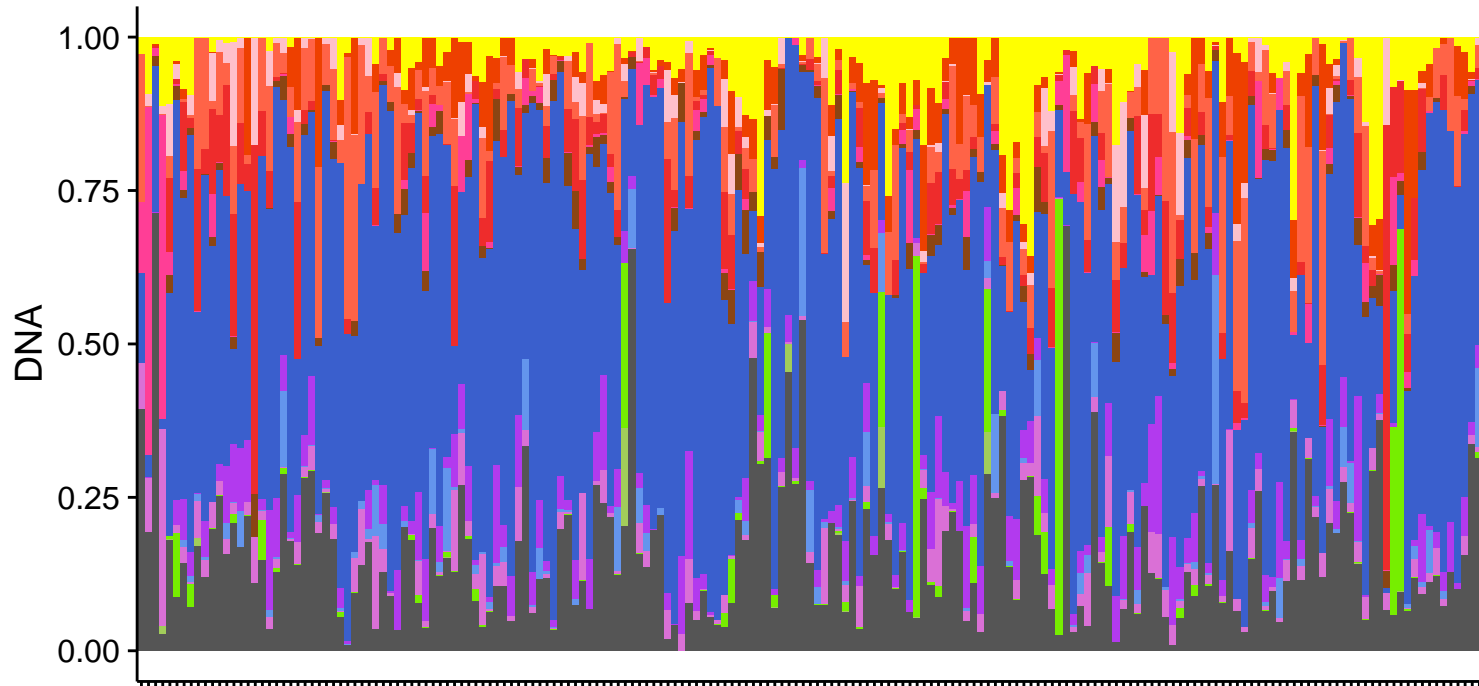

Person-week pair (DNA>0 n = 189)

# PWY-1042: glycolysis IV (plant cytosol)

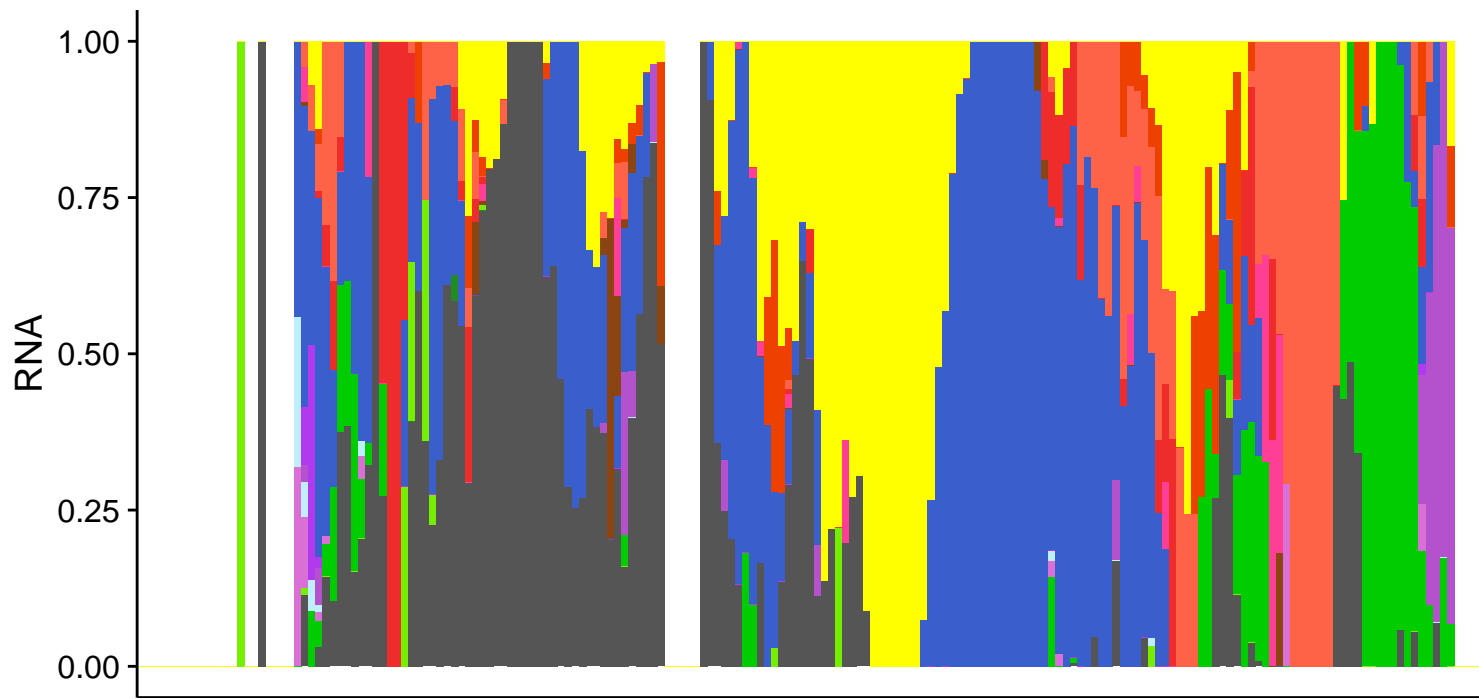

Person-week pair (RNA>0 n = 160)

## Bug

- *Alistipes shahii*
- *Bacteroides caccae*
- *Bacteroides ovatus*
- *Bacteroides thetaiotaomicron*
- *Bacteroides xylanisolvens*
- *Odoribacter splanchnicus*
- *Faecalibacterium prausnitzii*
- *Ruminococcus torques*
- *Ruminococcus obeum*
- *Ruminococcus bromii*
- *Anaerostipes hadrus*
- *Lachnospiraceae bacterium 5\_1\_63FAA*
- *Akkermansia muciniphila*
- *Escherichia coli*
- *Klebsiella pneumoniae*
- *Haemophilus parainfluenzae*
- *other*

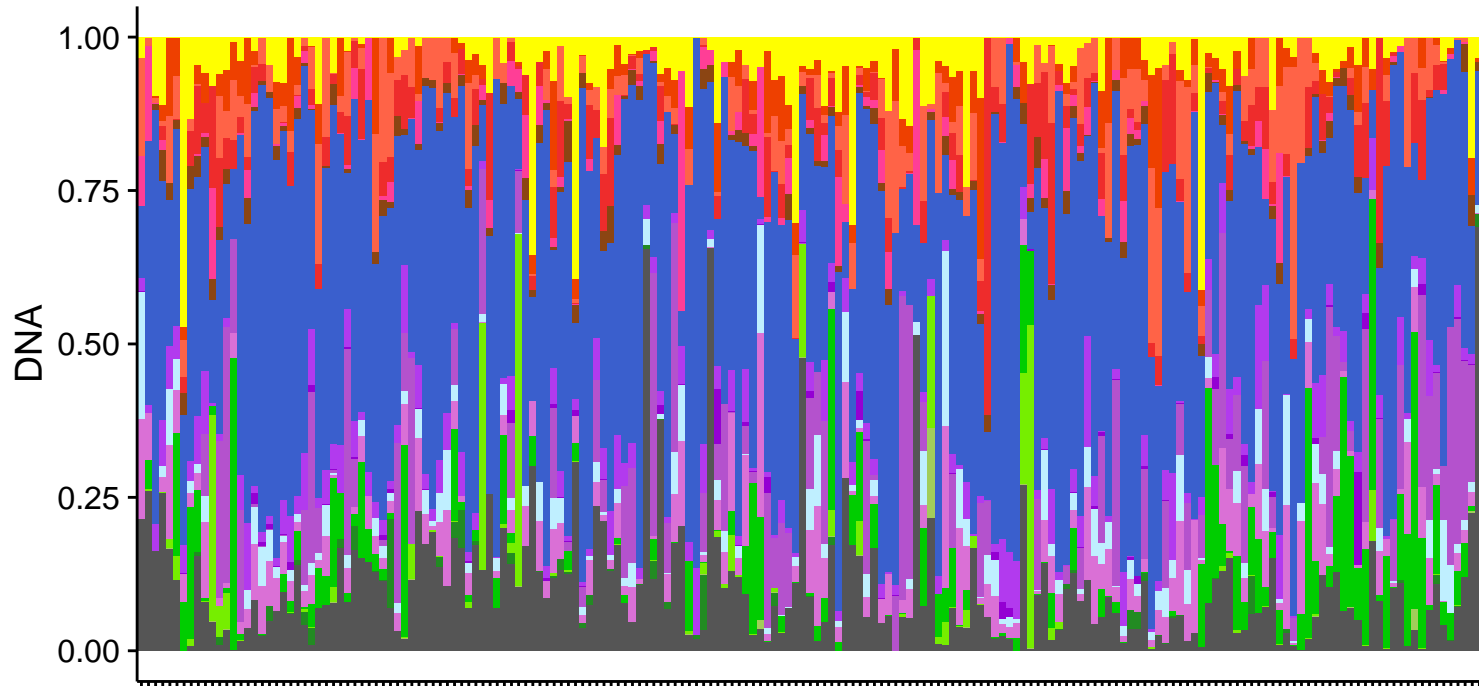

Person-week pair (DNA>0 n = 189)

# PWY-7184: pyrimidine deoxyribonucleotides de novo biosynthesis I

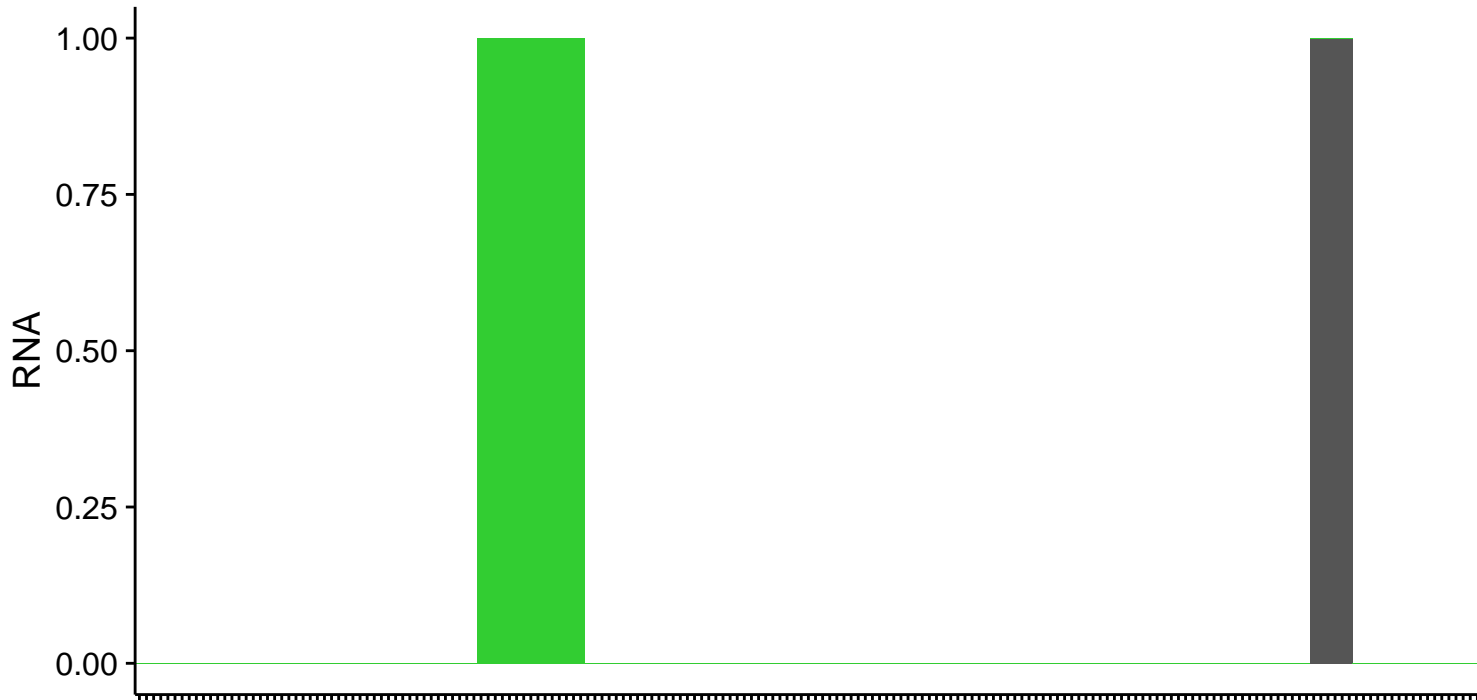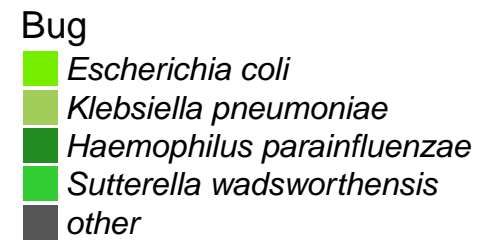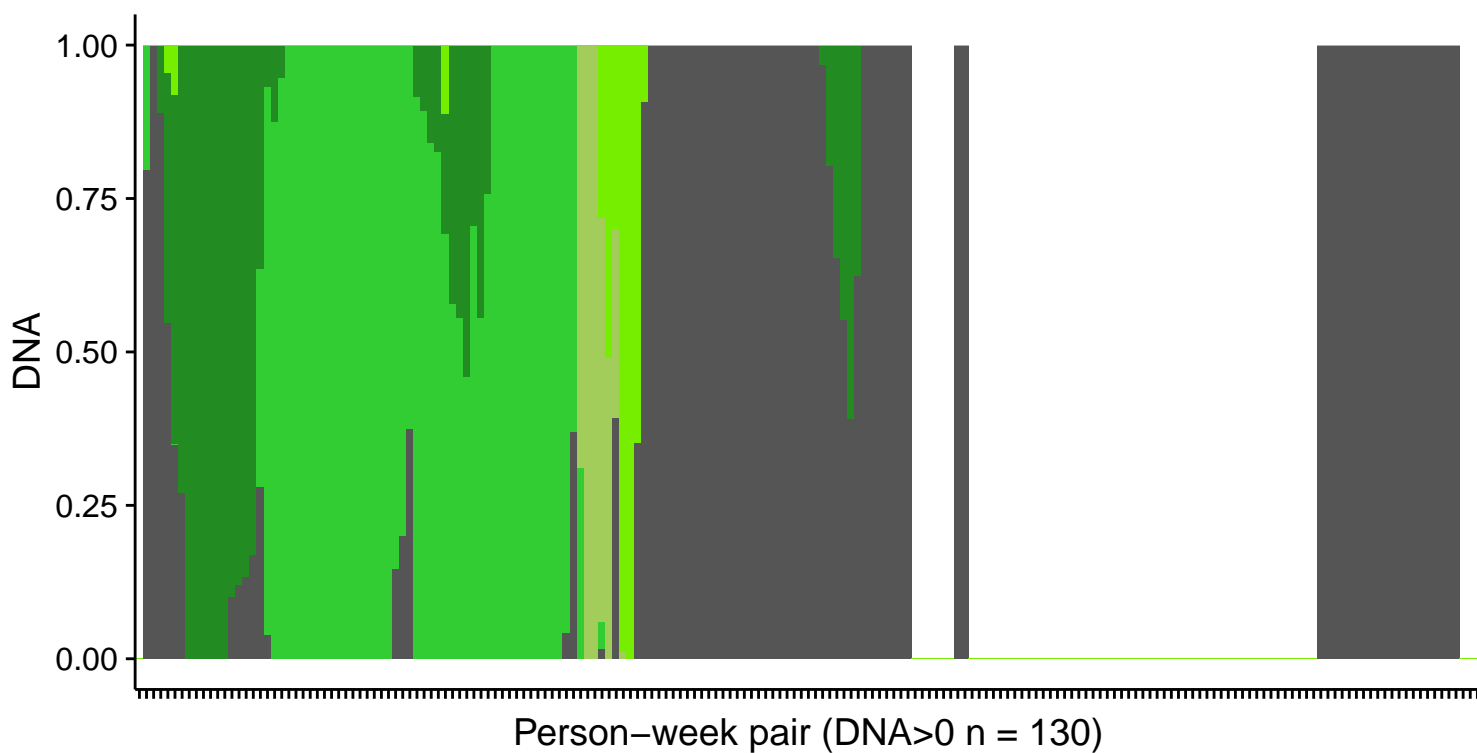



# PWY0-166: superpathway of pyrimidine deoxyribonucleotides de novo biosynthesis (E. coli)

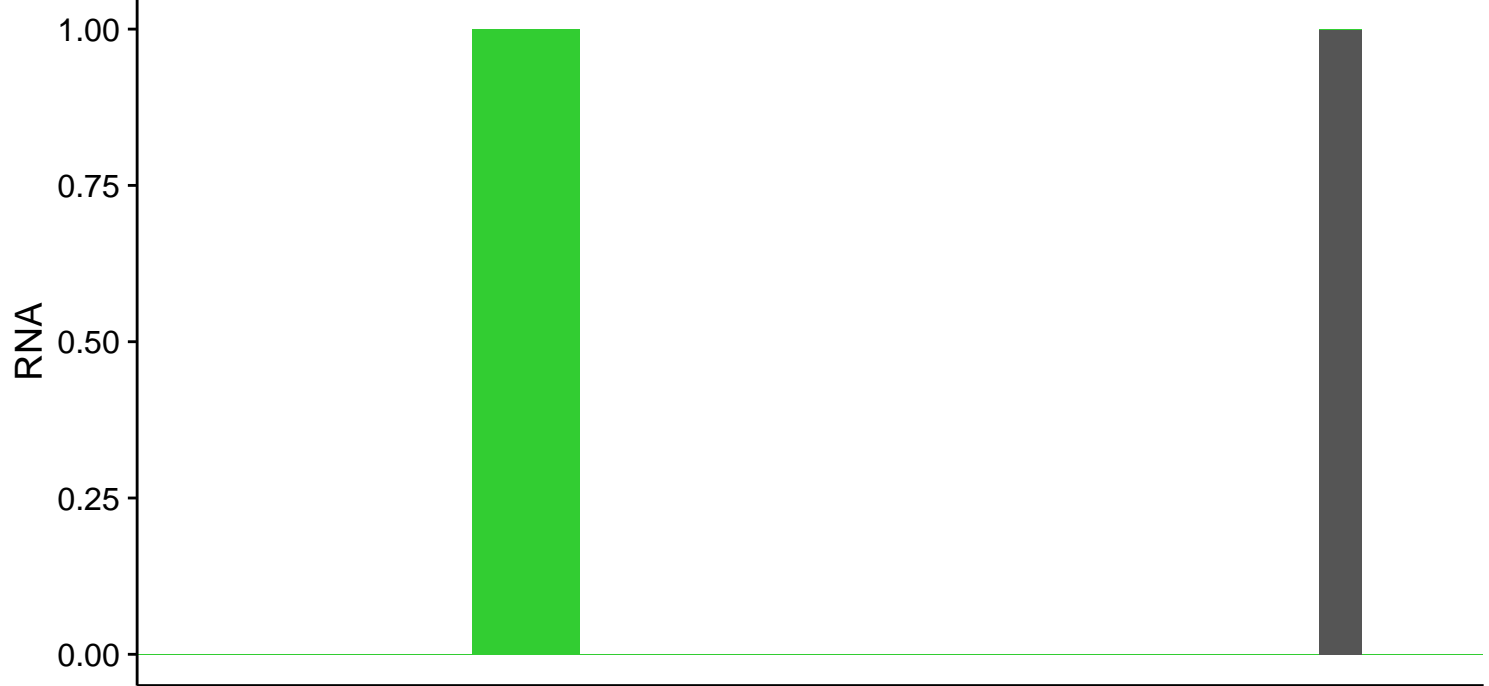

Person-week pair (RNA>0 n = 21)

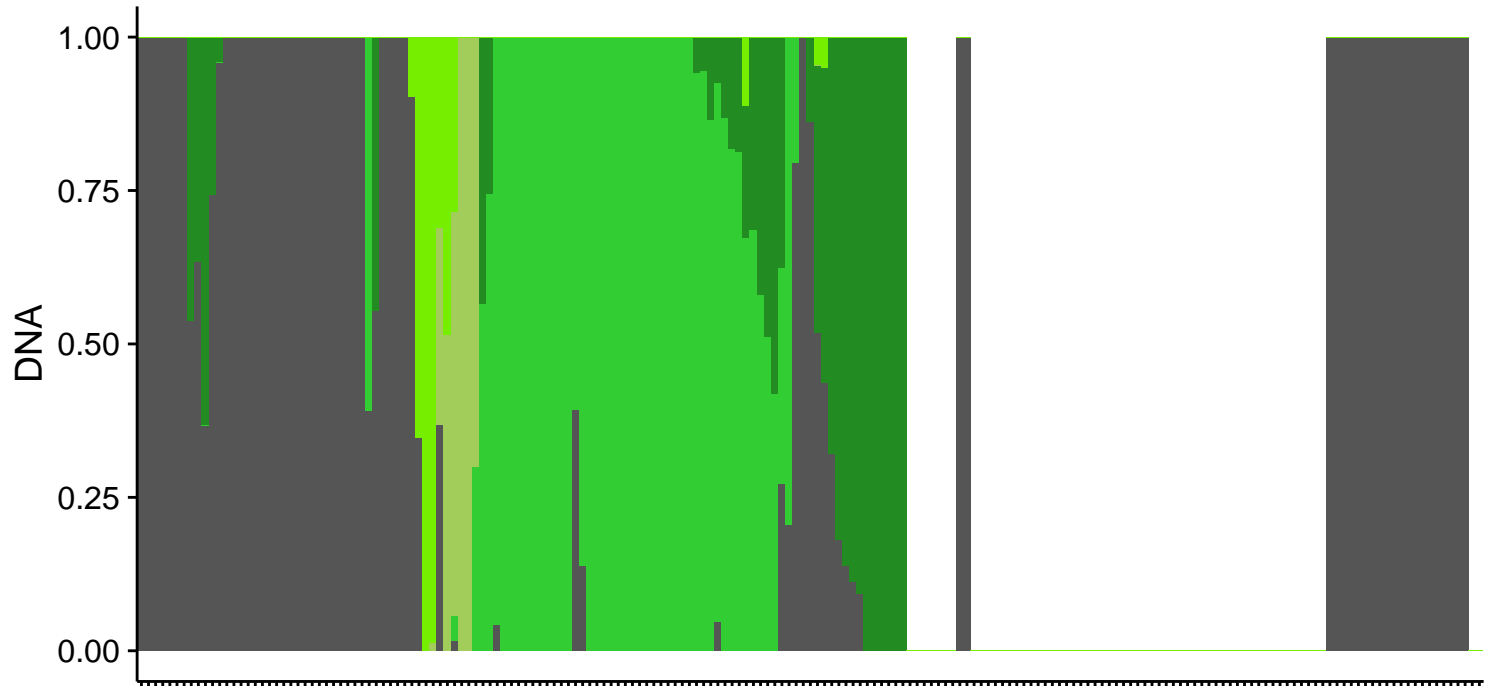

Person-week pair (DNA>0 n = 130)

# PWY-5973: cis-vaccenate biosynthesis

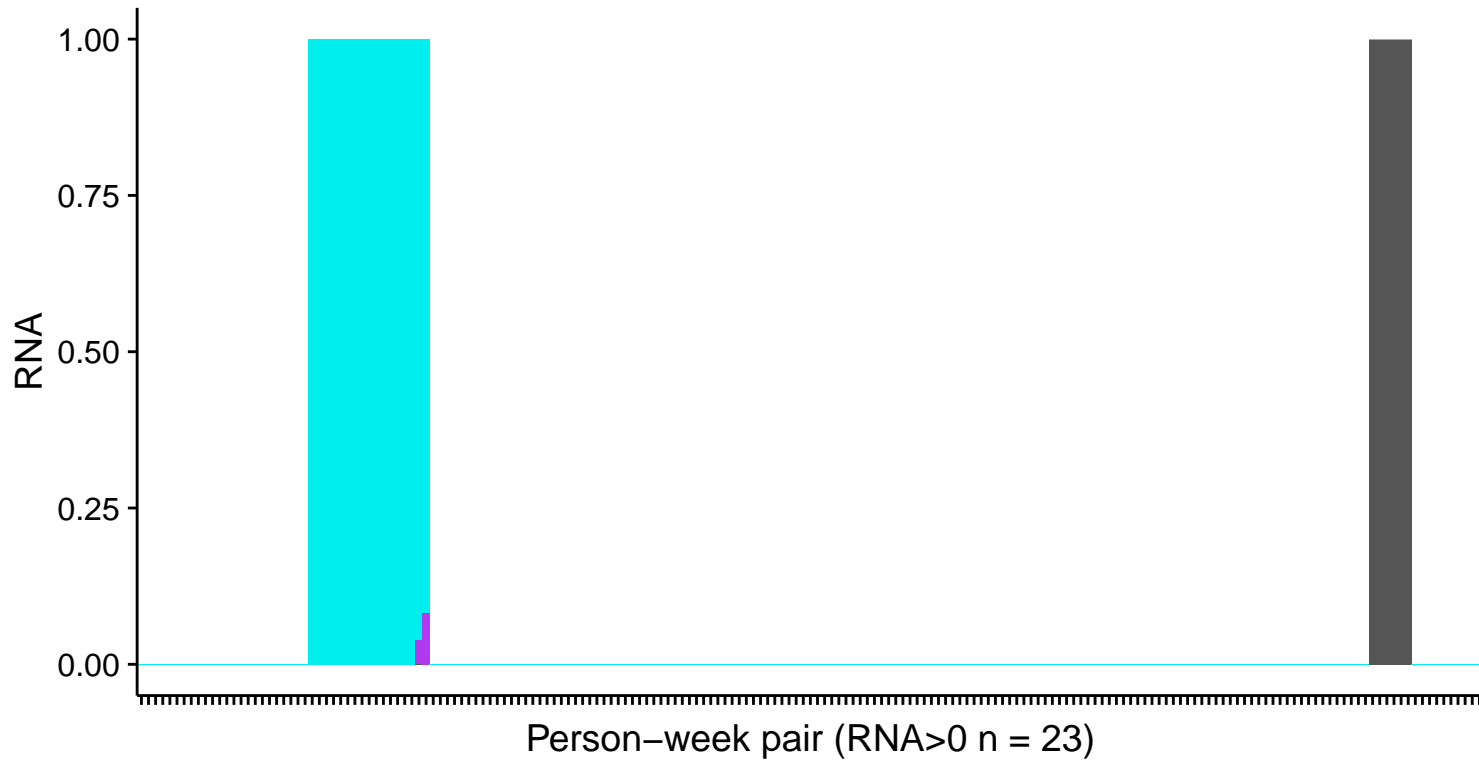

Bug

- *Eubacterium rectale*
- *Ruminococcus torques*
- other

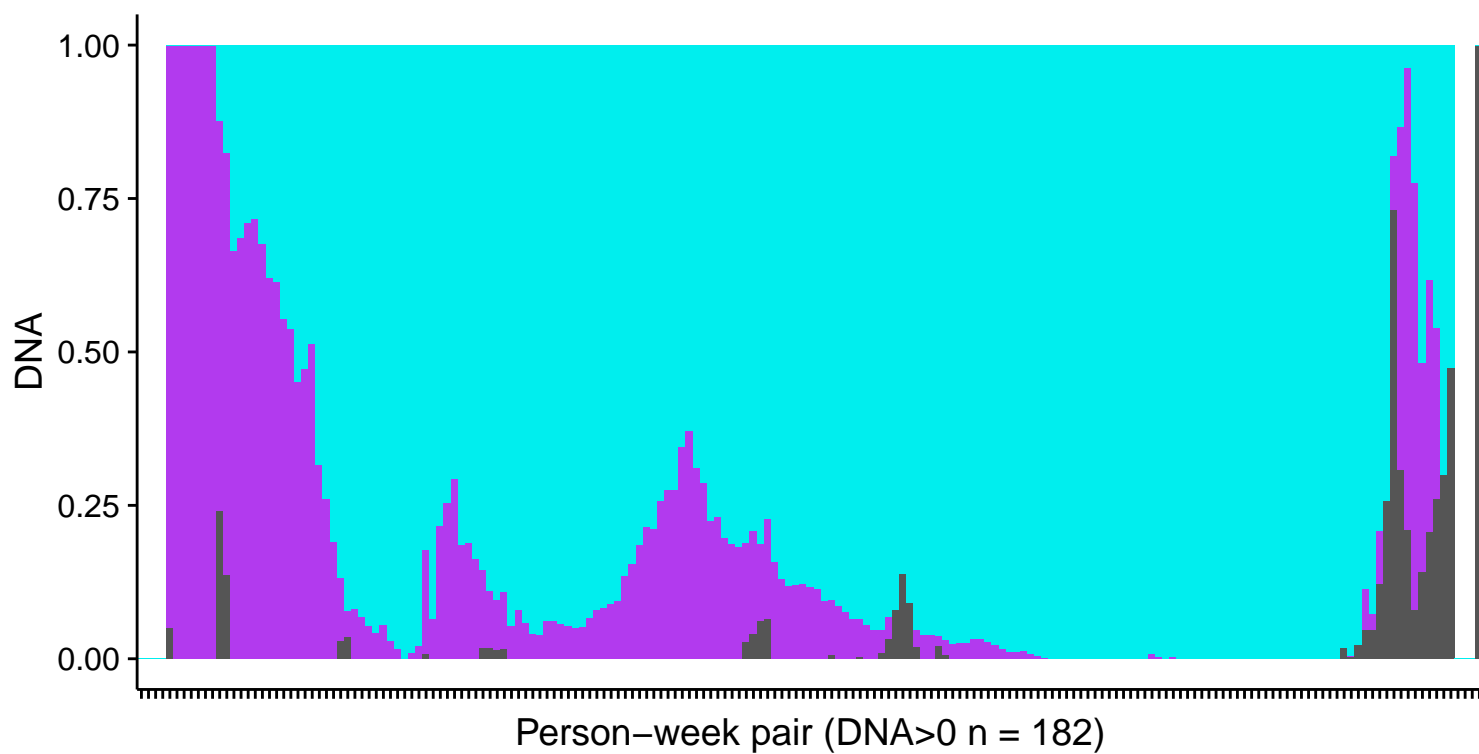

# PWY-4981: L-proline biosynthesis II (from arginine)

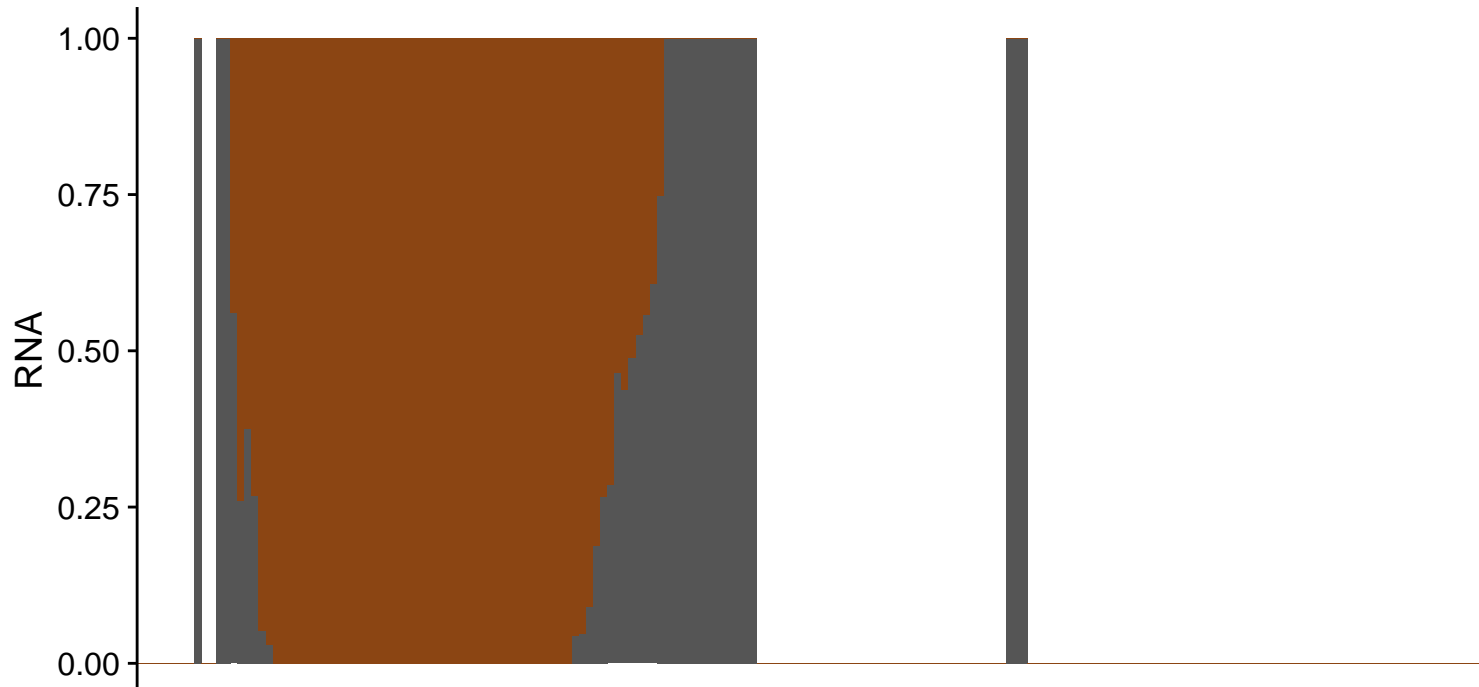

Person-week pair (RNA>0 n = 80)

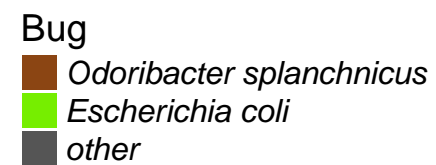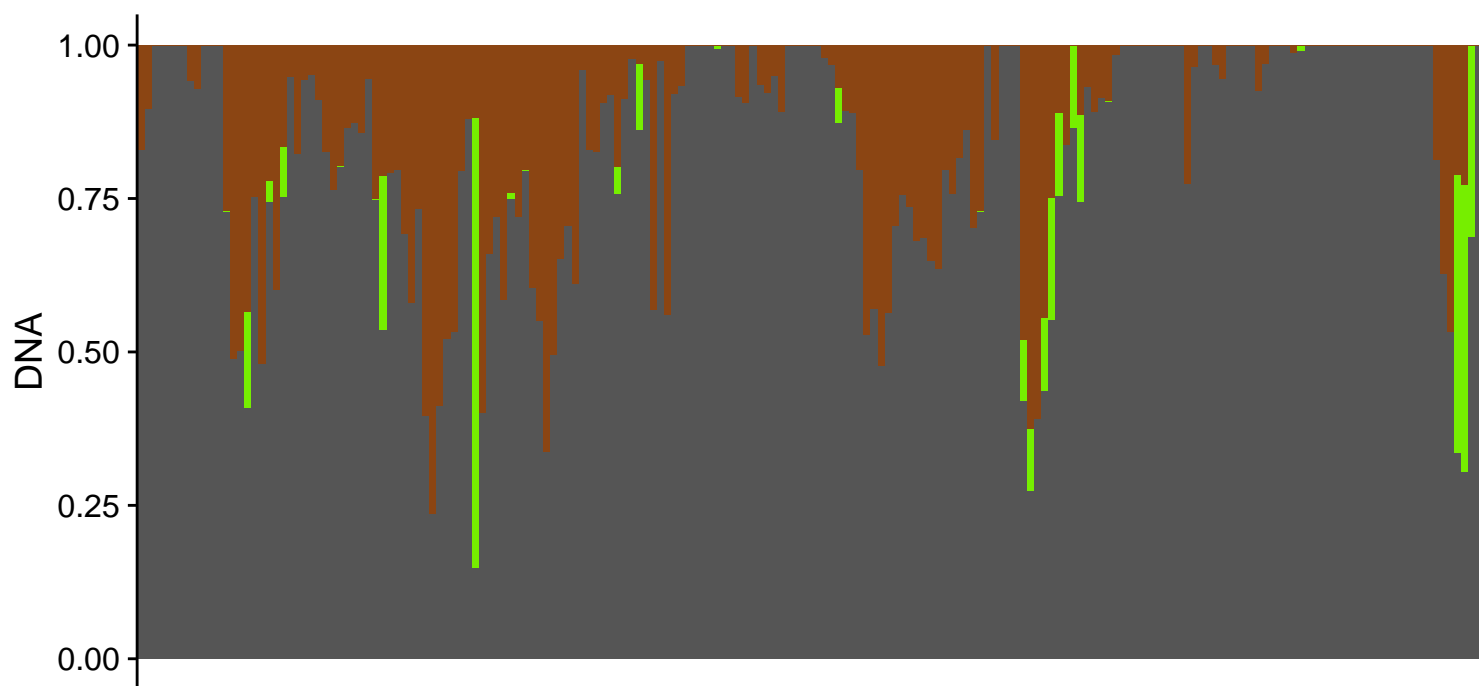

Person-week pair (DNA>0 n = 189)

# PWY-2941: L-lysine biosynthesis II

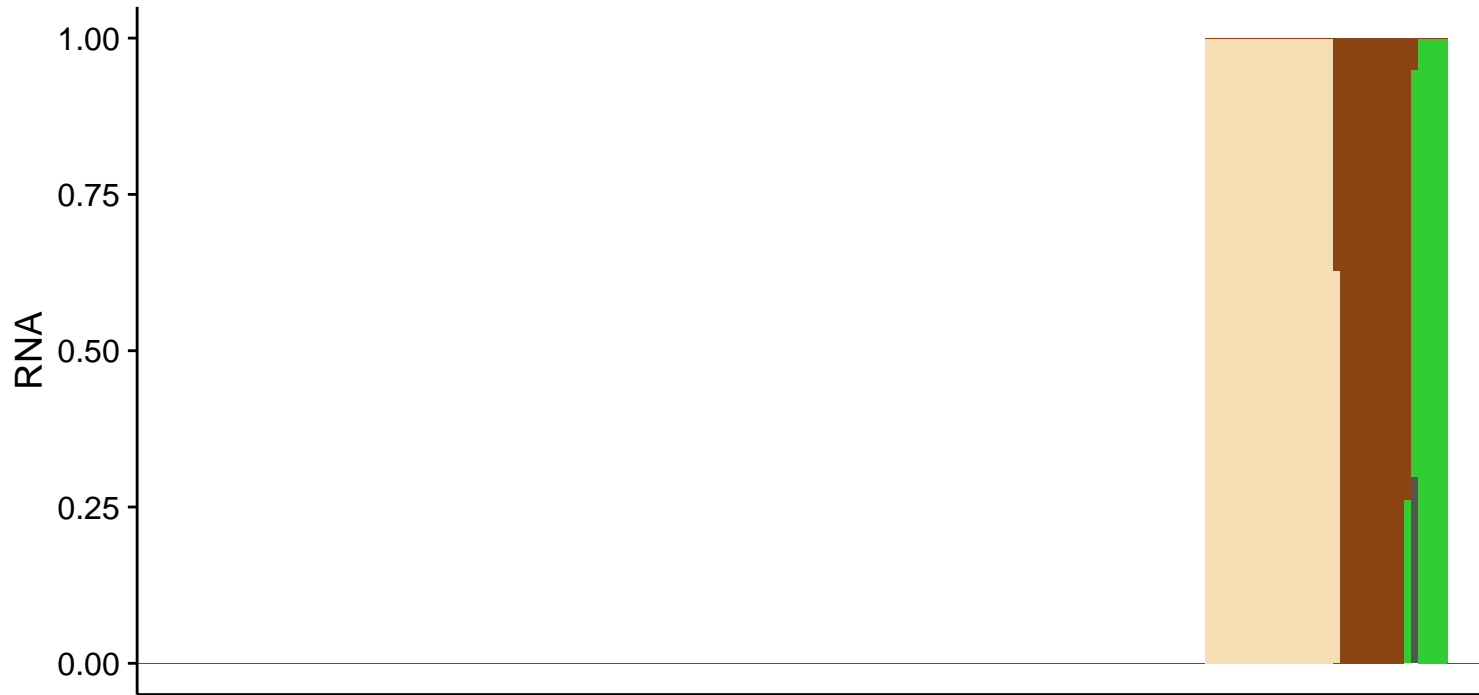

Person-week pair (RNA>0 n = 34)

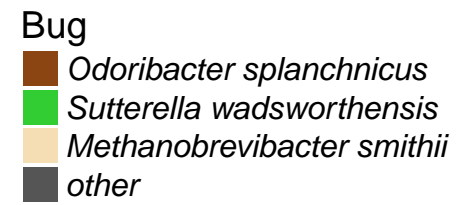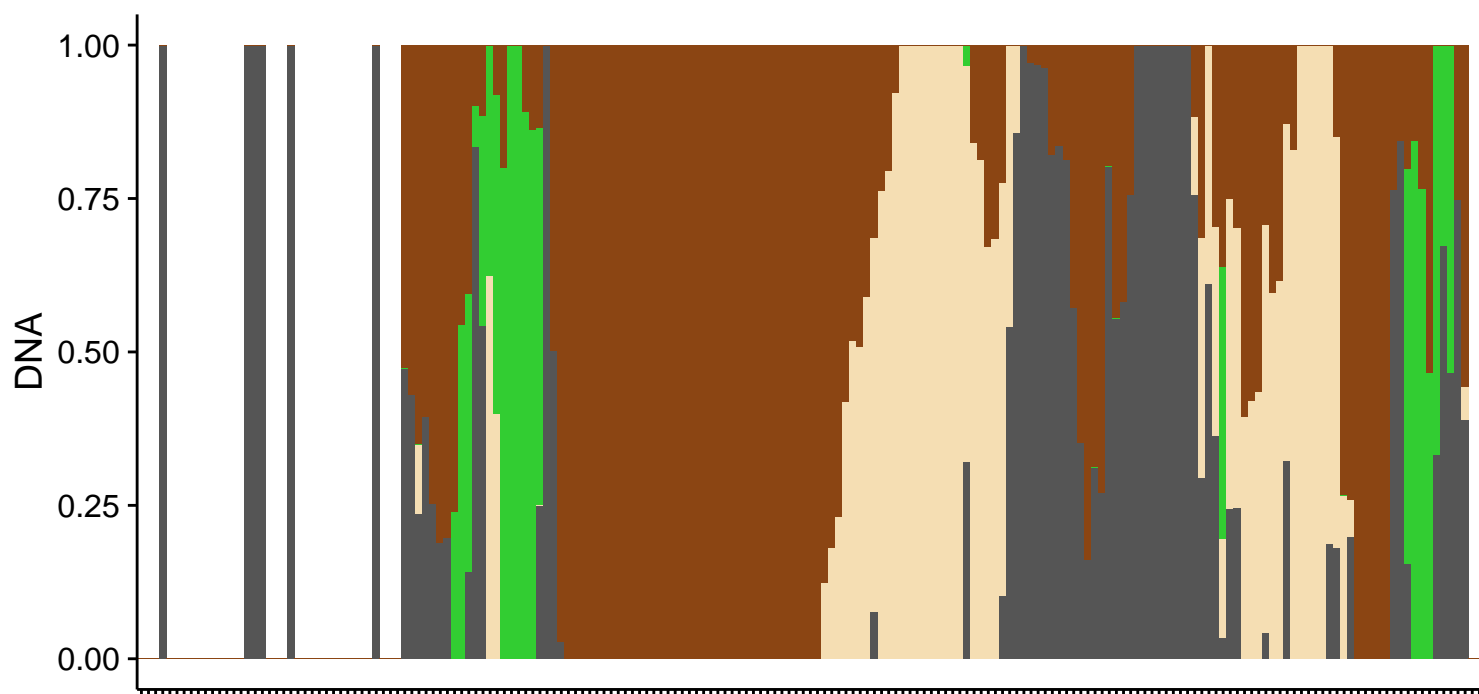

Person-week pair (DNA>0 n = 156)

# SER-GLYSYN-PWY: superpathway of L-serine and glycine biosynthesis I

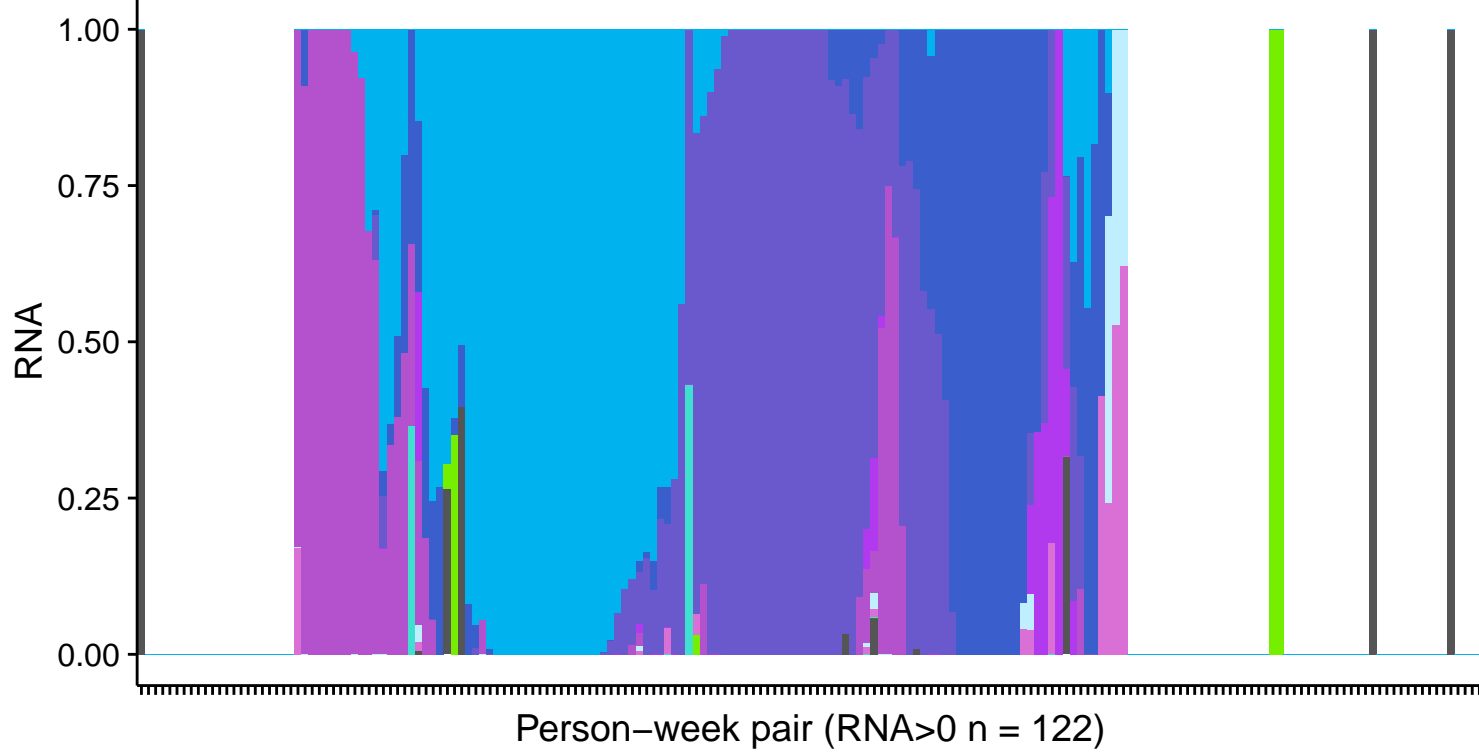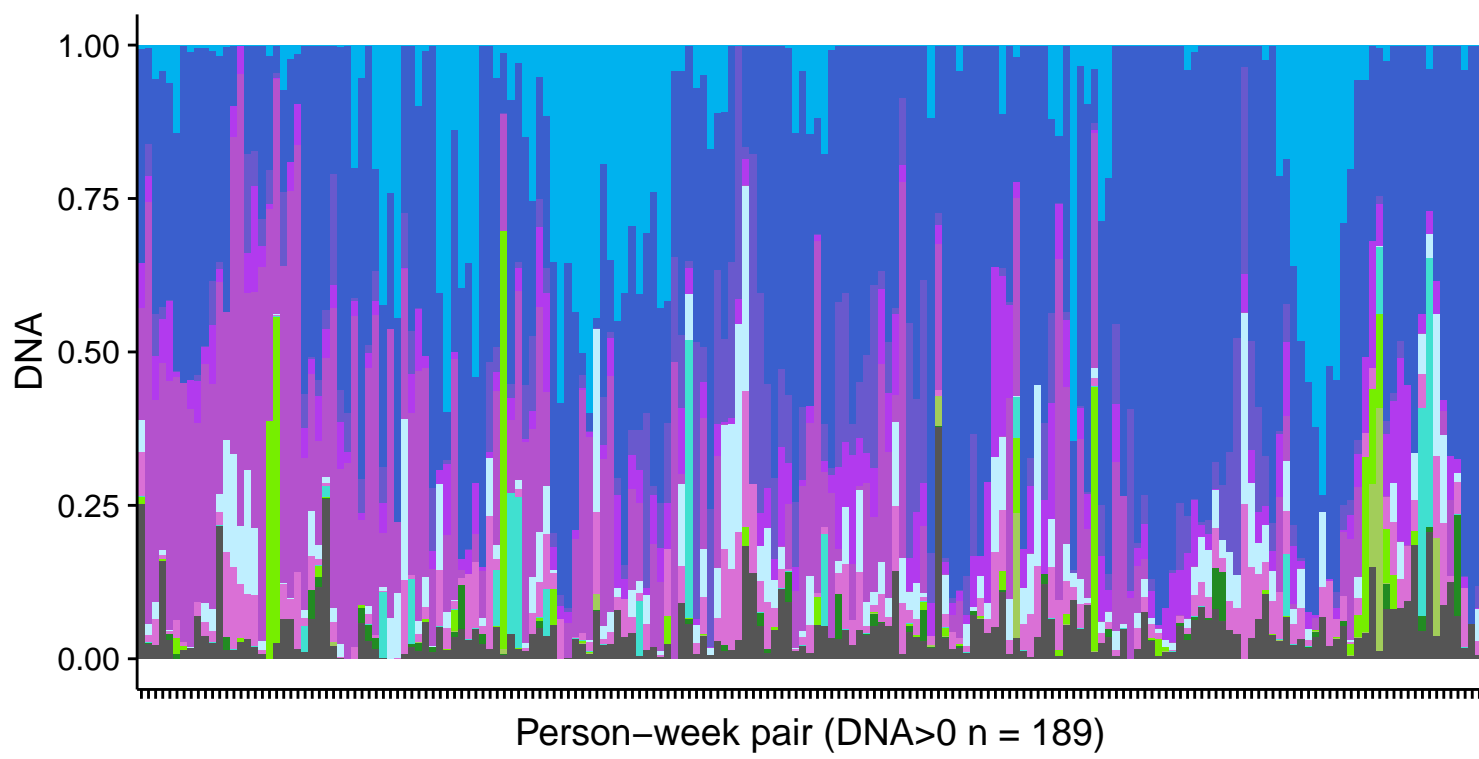

## Bug

- Eubacterium siraeum*
- Faecalibacterium prausnitzii*
- Roseburia intestinalis*
- Ruminococcus torques*
- Ruminococcus bromii*
- Anaerostipes hadrus*
- Lachnospiraceae bacterium 5\_1\_63FAA*
- Phascolarctobacterium succinatutens*
- Escherichia coli*
- Klebsiella pneumoniae*
- Haemophilus parainfluenzae*
- other

# ASPASN-PWY: superpathway of L-aspartate and L-asparagine biosynthesis

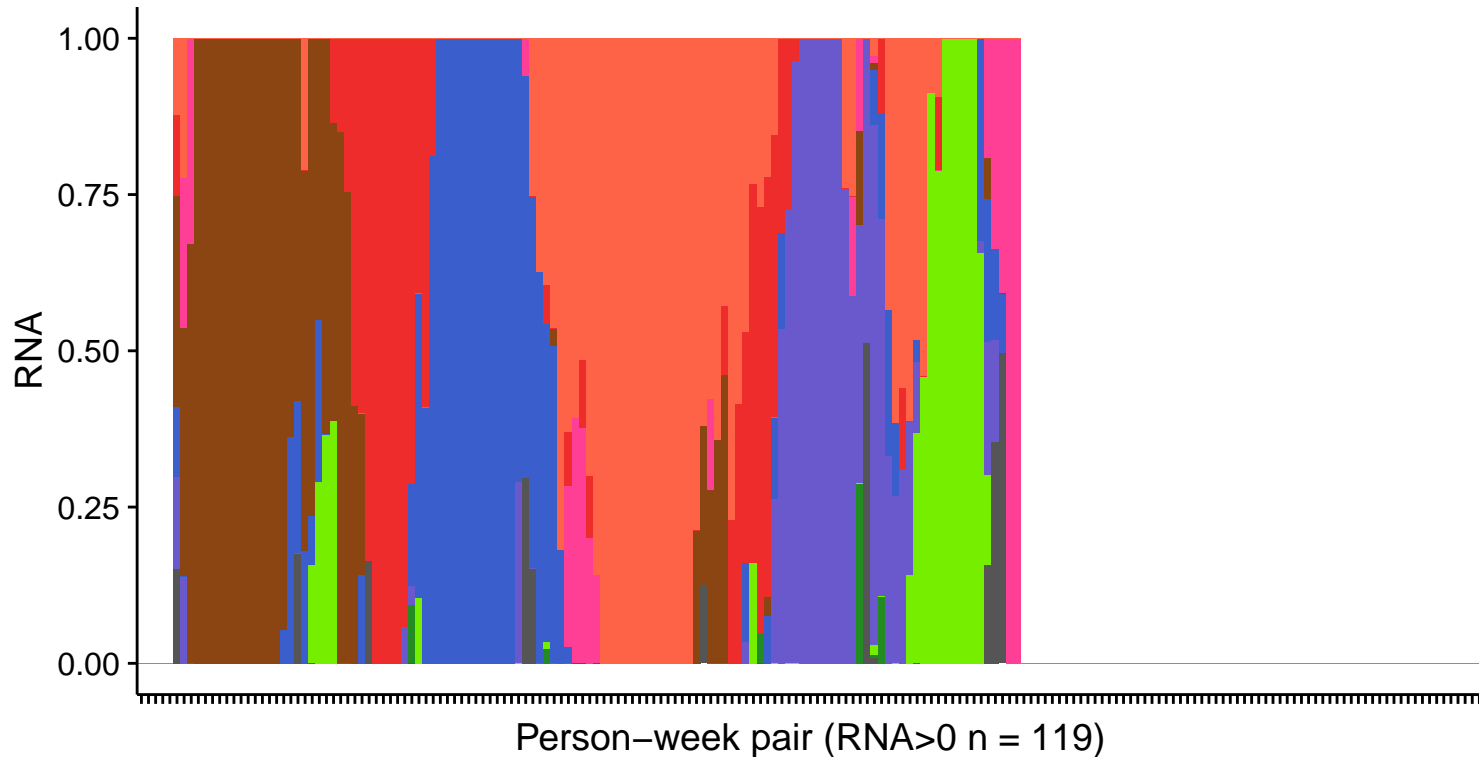

## Bug

- Bacteroides ovatus*
- Bacteroides thetaiotaomicron*
- Bacteroides xylanisolvans*
- Odoribacter splanchnicus*
- Faecalibacterium prausnitzii*
- Roseburia intestinalis*
- Escherichia coli*
- Haemophilus parainfluenzae*
- other

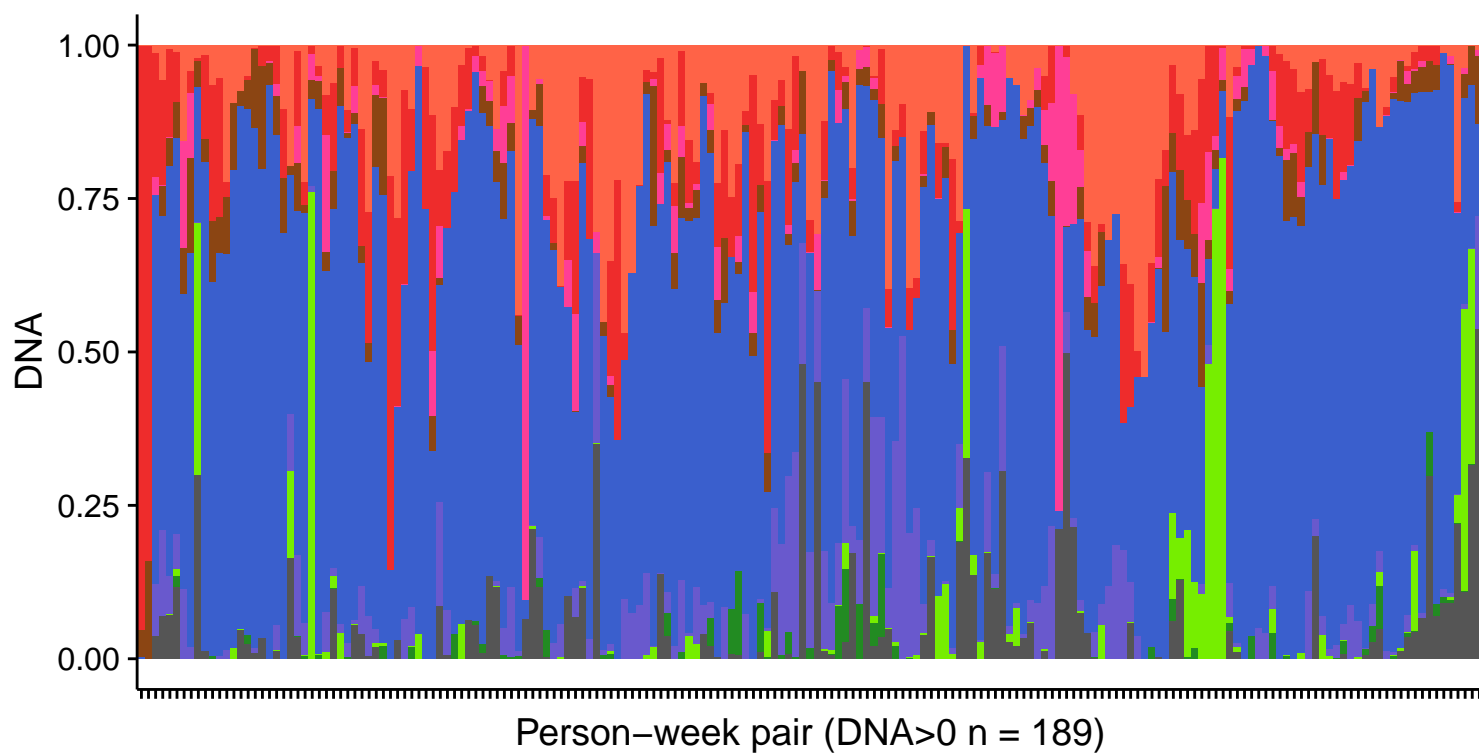

# COBALSYN-PWY: adenosylcobalamin salvage from cobinamide I

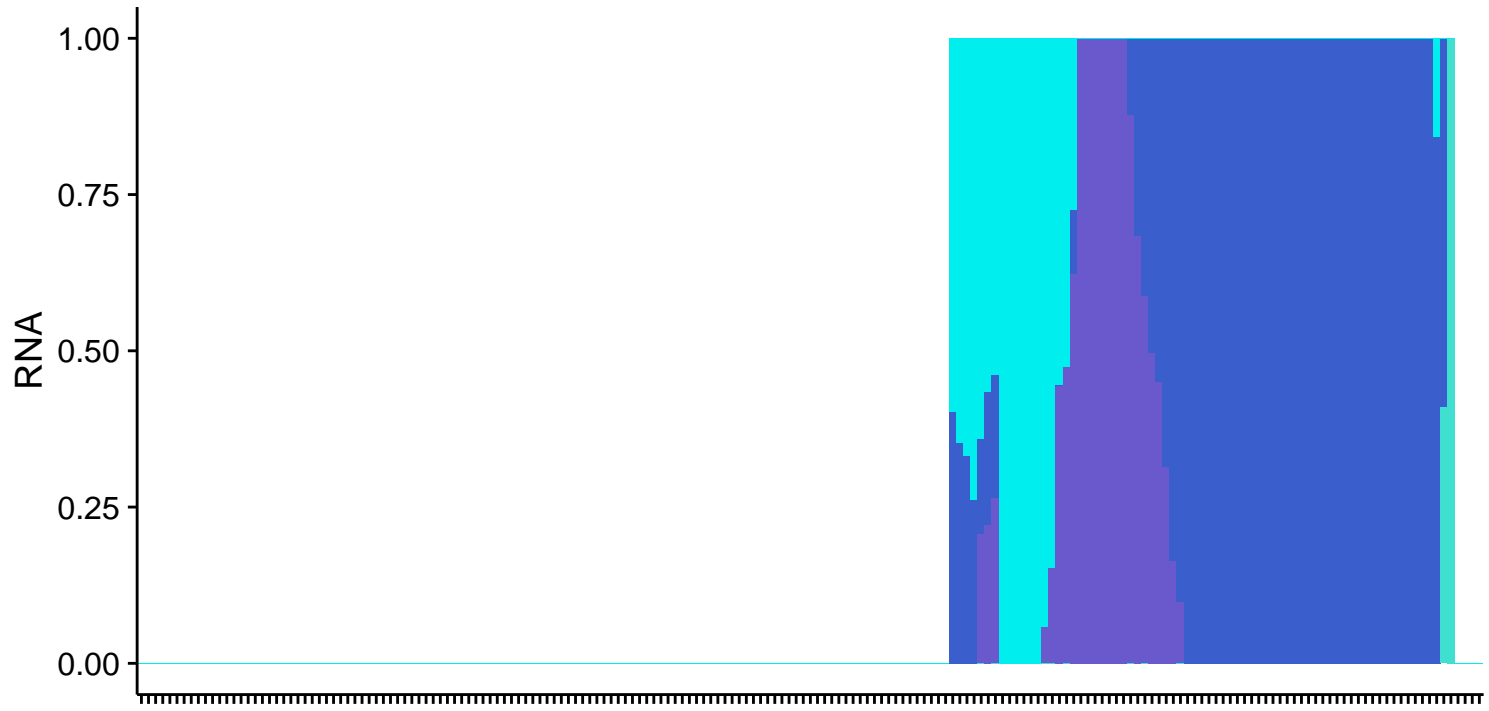

Person-week pair (RNA>0 n = 71)

- Bug
- Eubacterium rectale*
  - Faecalibacterium prausnitzii*
  - Roseburia intestinalis*
  - Ruminococcus obeum*
  - Phascolarctobacterium succinatutens*
  - Escherichia coli*
  - other

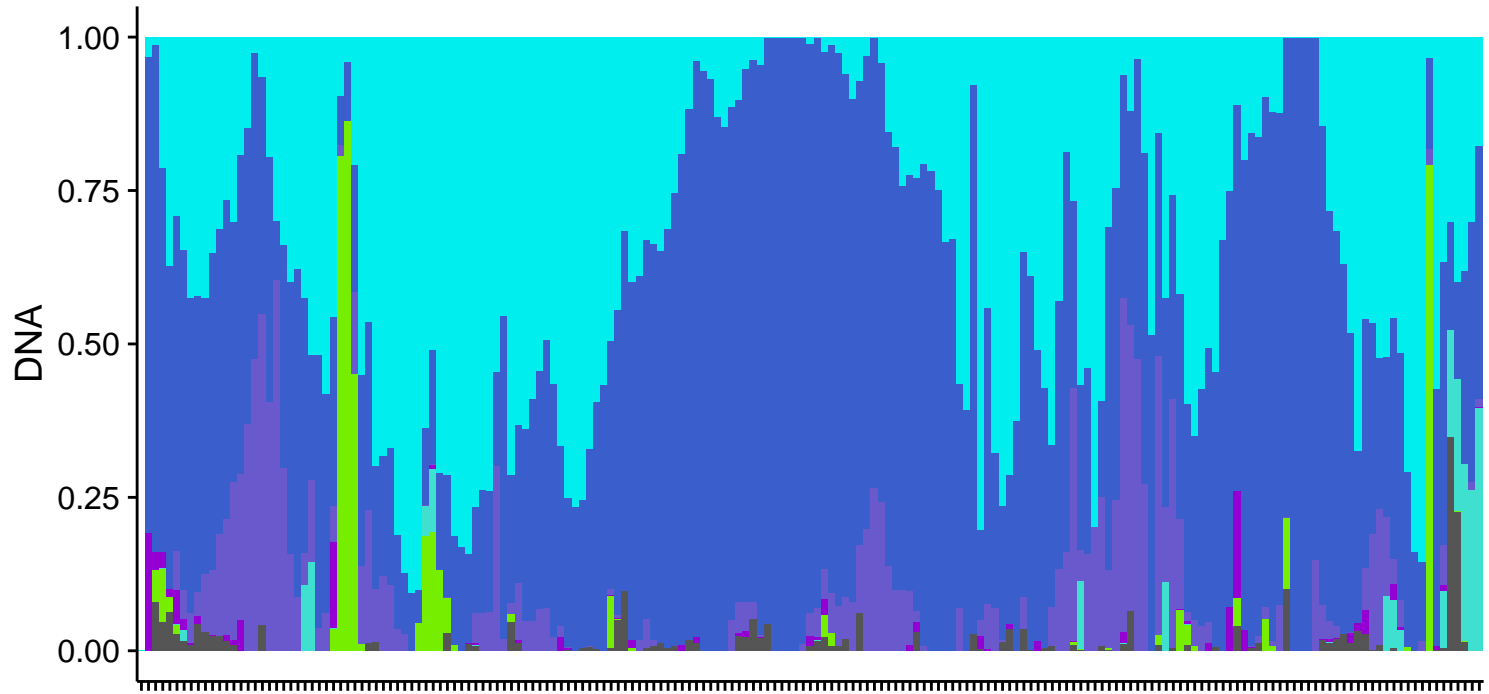

Person-week pair (DNA>0 n = 188)

# PWY-7242: D-fructuronate degradation

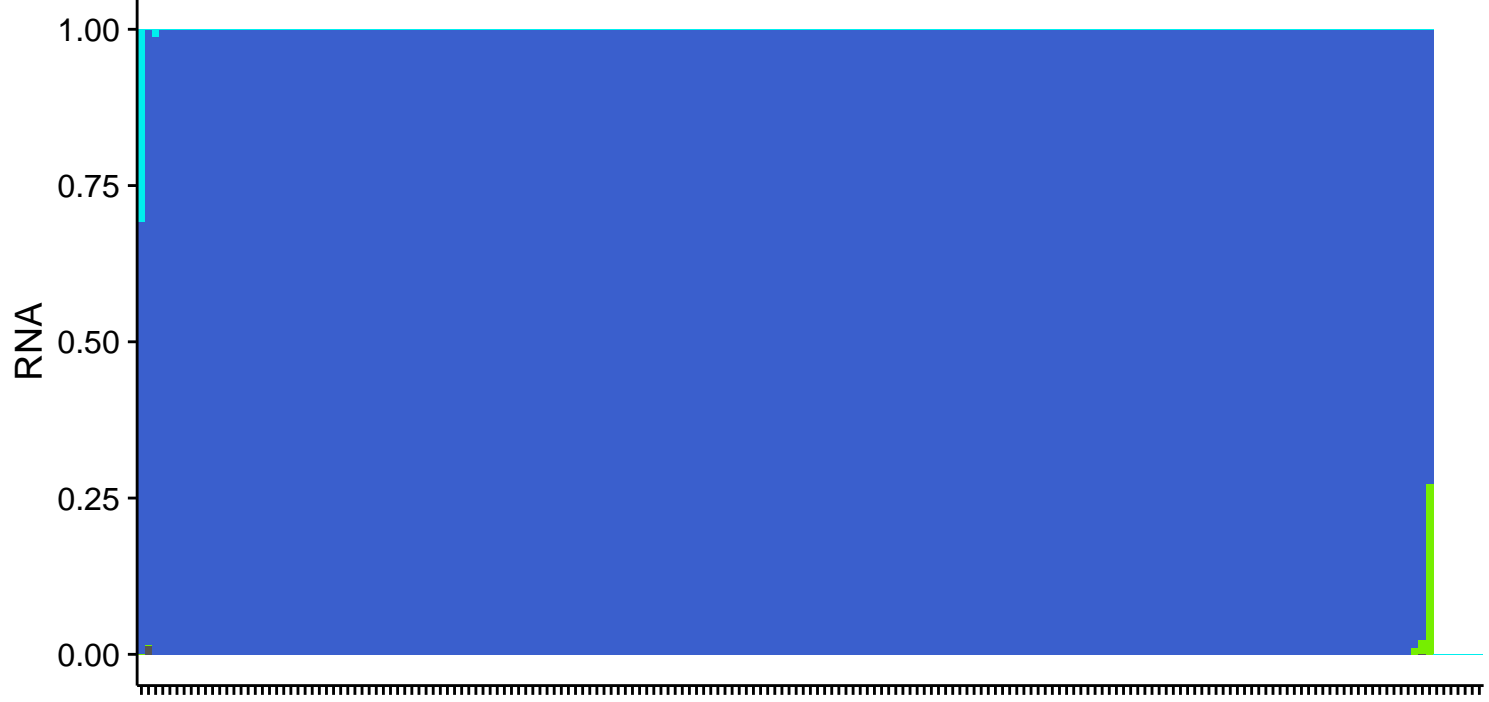

Person-week pair (RNA>0 n = 182)

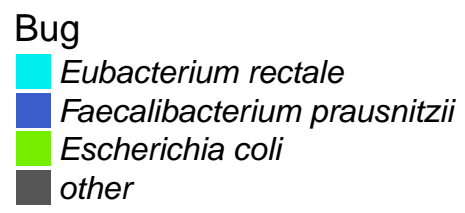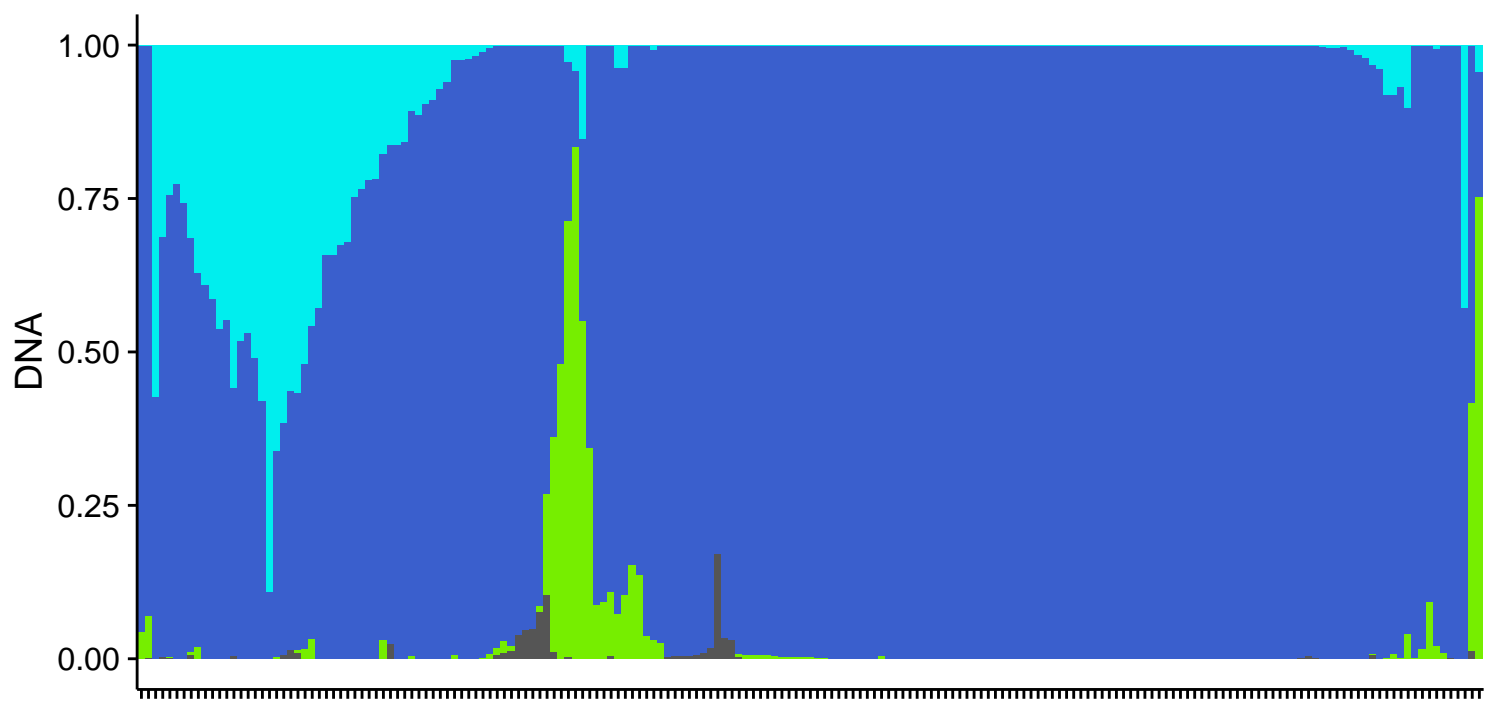

Person-week pair (DNA>0 n = 189)



# PWY-6385: peptidoglycan biosynthesis III (mycobacteria)

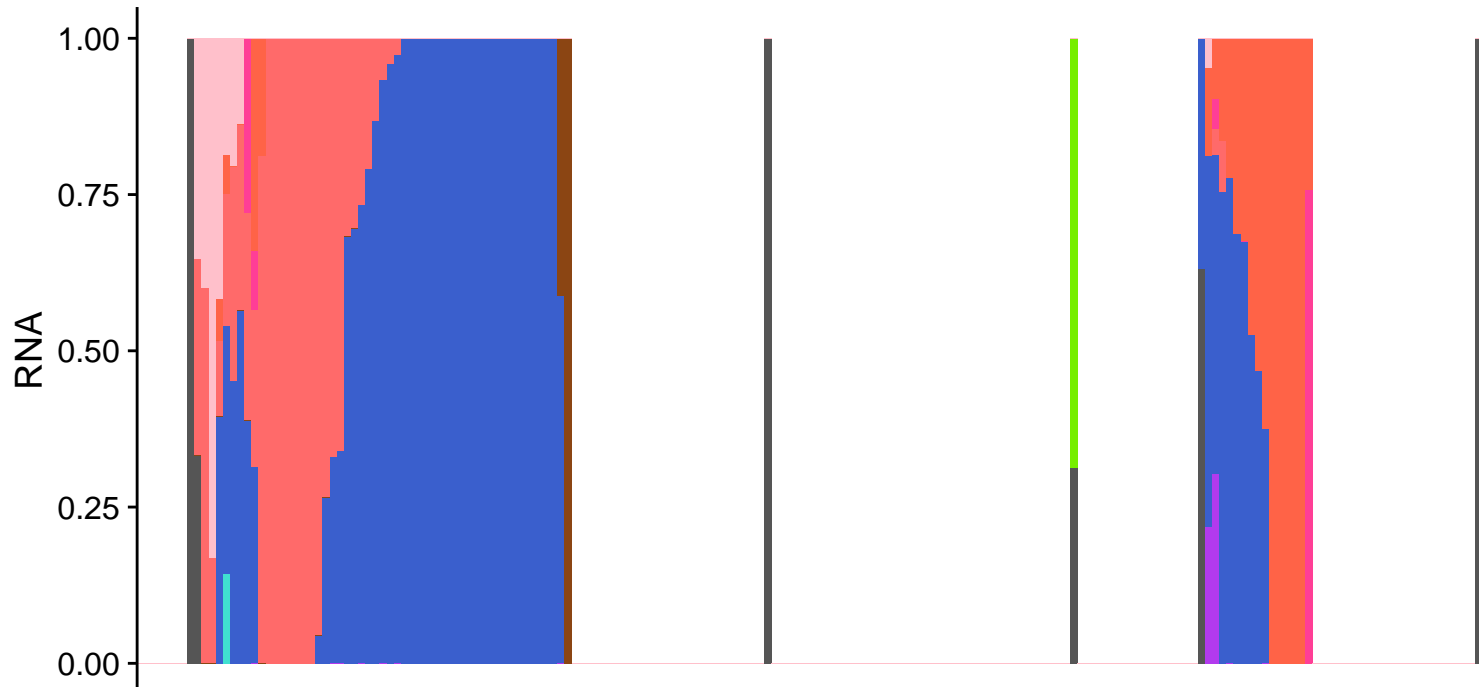

Person-week pair (RNA>0 n = 73)

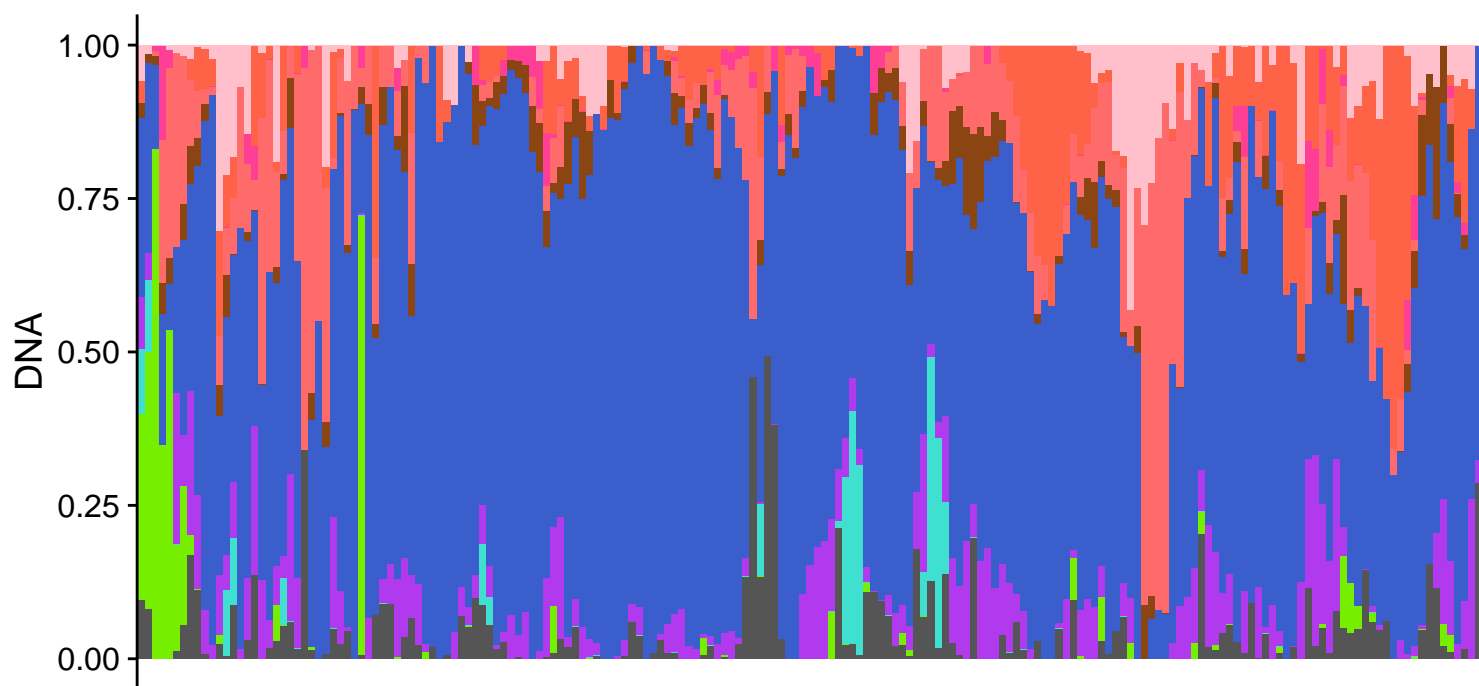

Person-week pair (DNA>0 n = 189)

## Bug

- Bacteroides fragilis*
- Bacteroides ovatus*
- Bacteroides xylanisolvens*
- Parabacteroides distasonis*
- Odoribacter splanchnicus*
- Faecalibacterium prausnitzii*
- Ruminococcus torques*
- Phascolarctobacterium succinatutens*
- Escherichia coli*
- other

# PWY-7539: 6-hydroxymethyl-dihydropterin diphosphate biosynthesis III (Chlamydia)

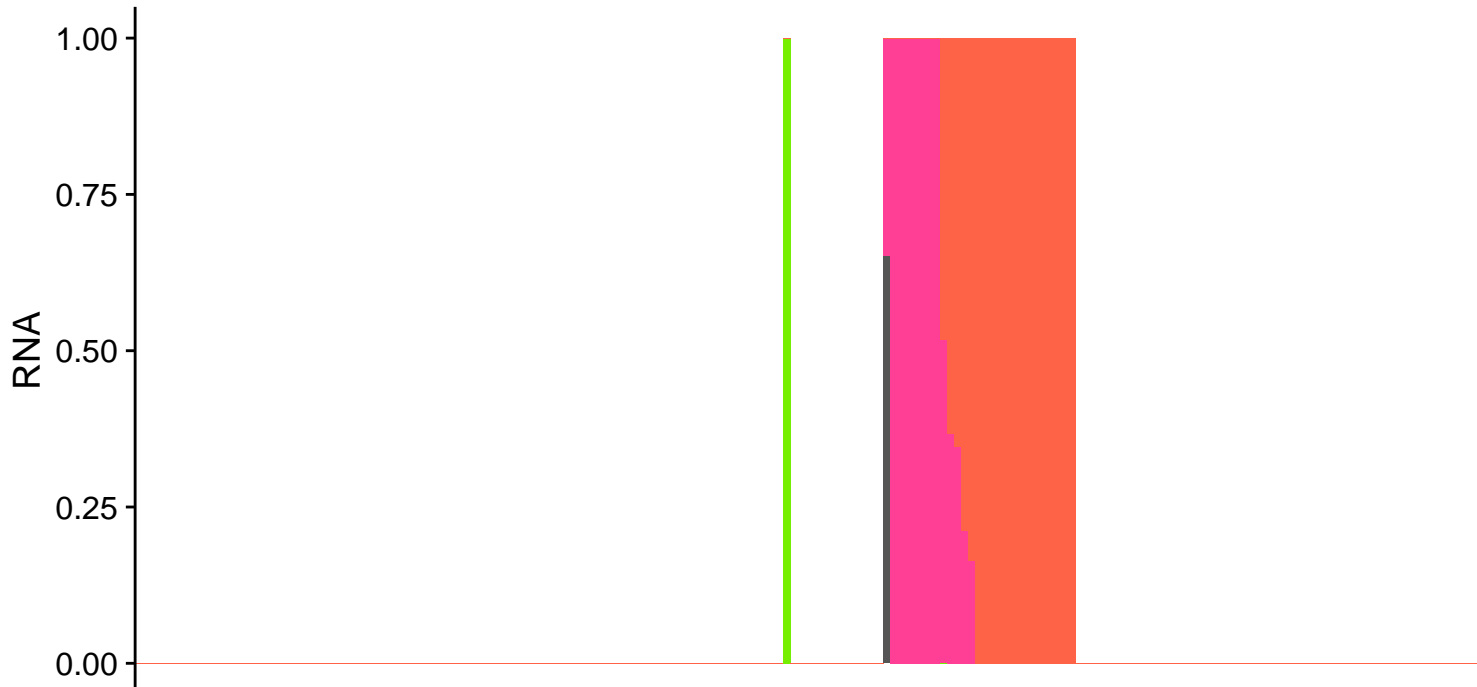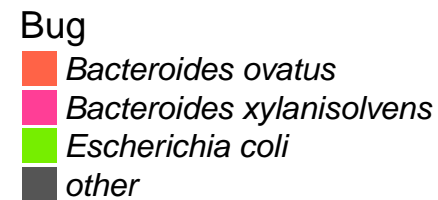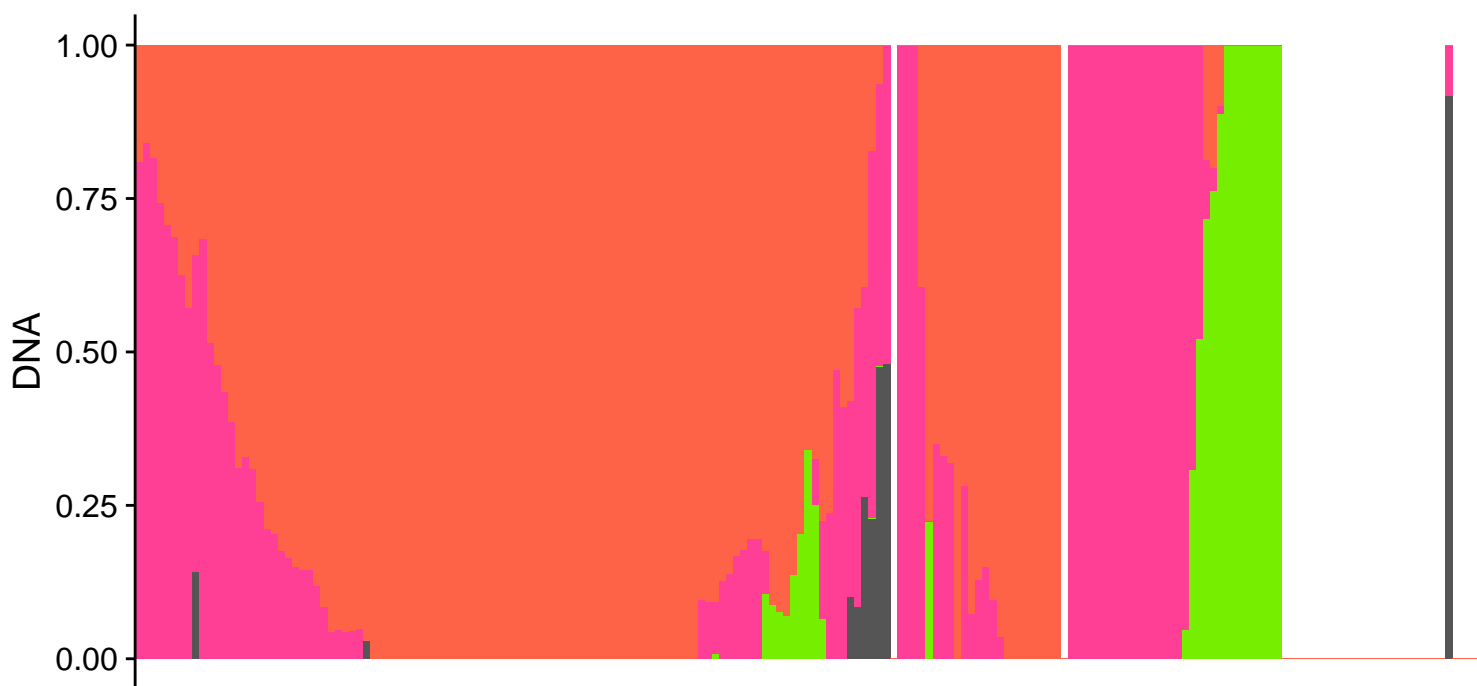

Person-week pair (DNA>0 n = 160)

# GALACT-GLUCUROCAT-PWY: superpathway of hexuronide and hexuronate degradation

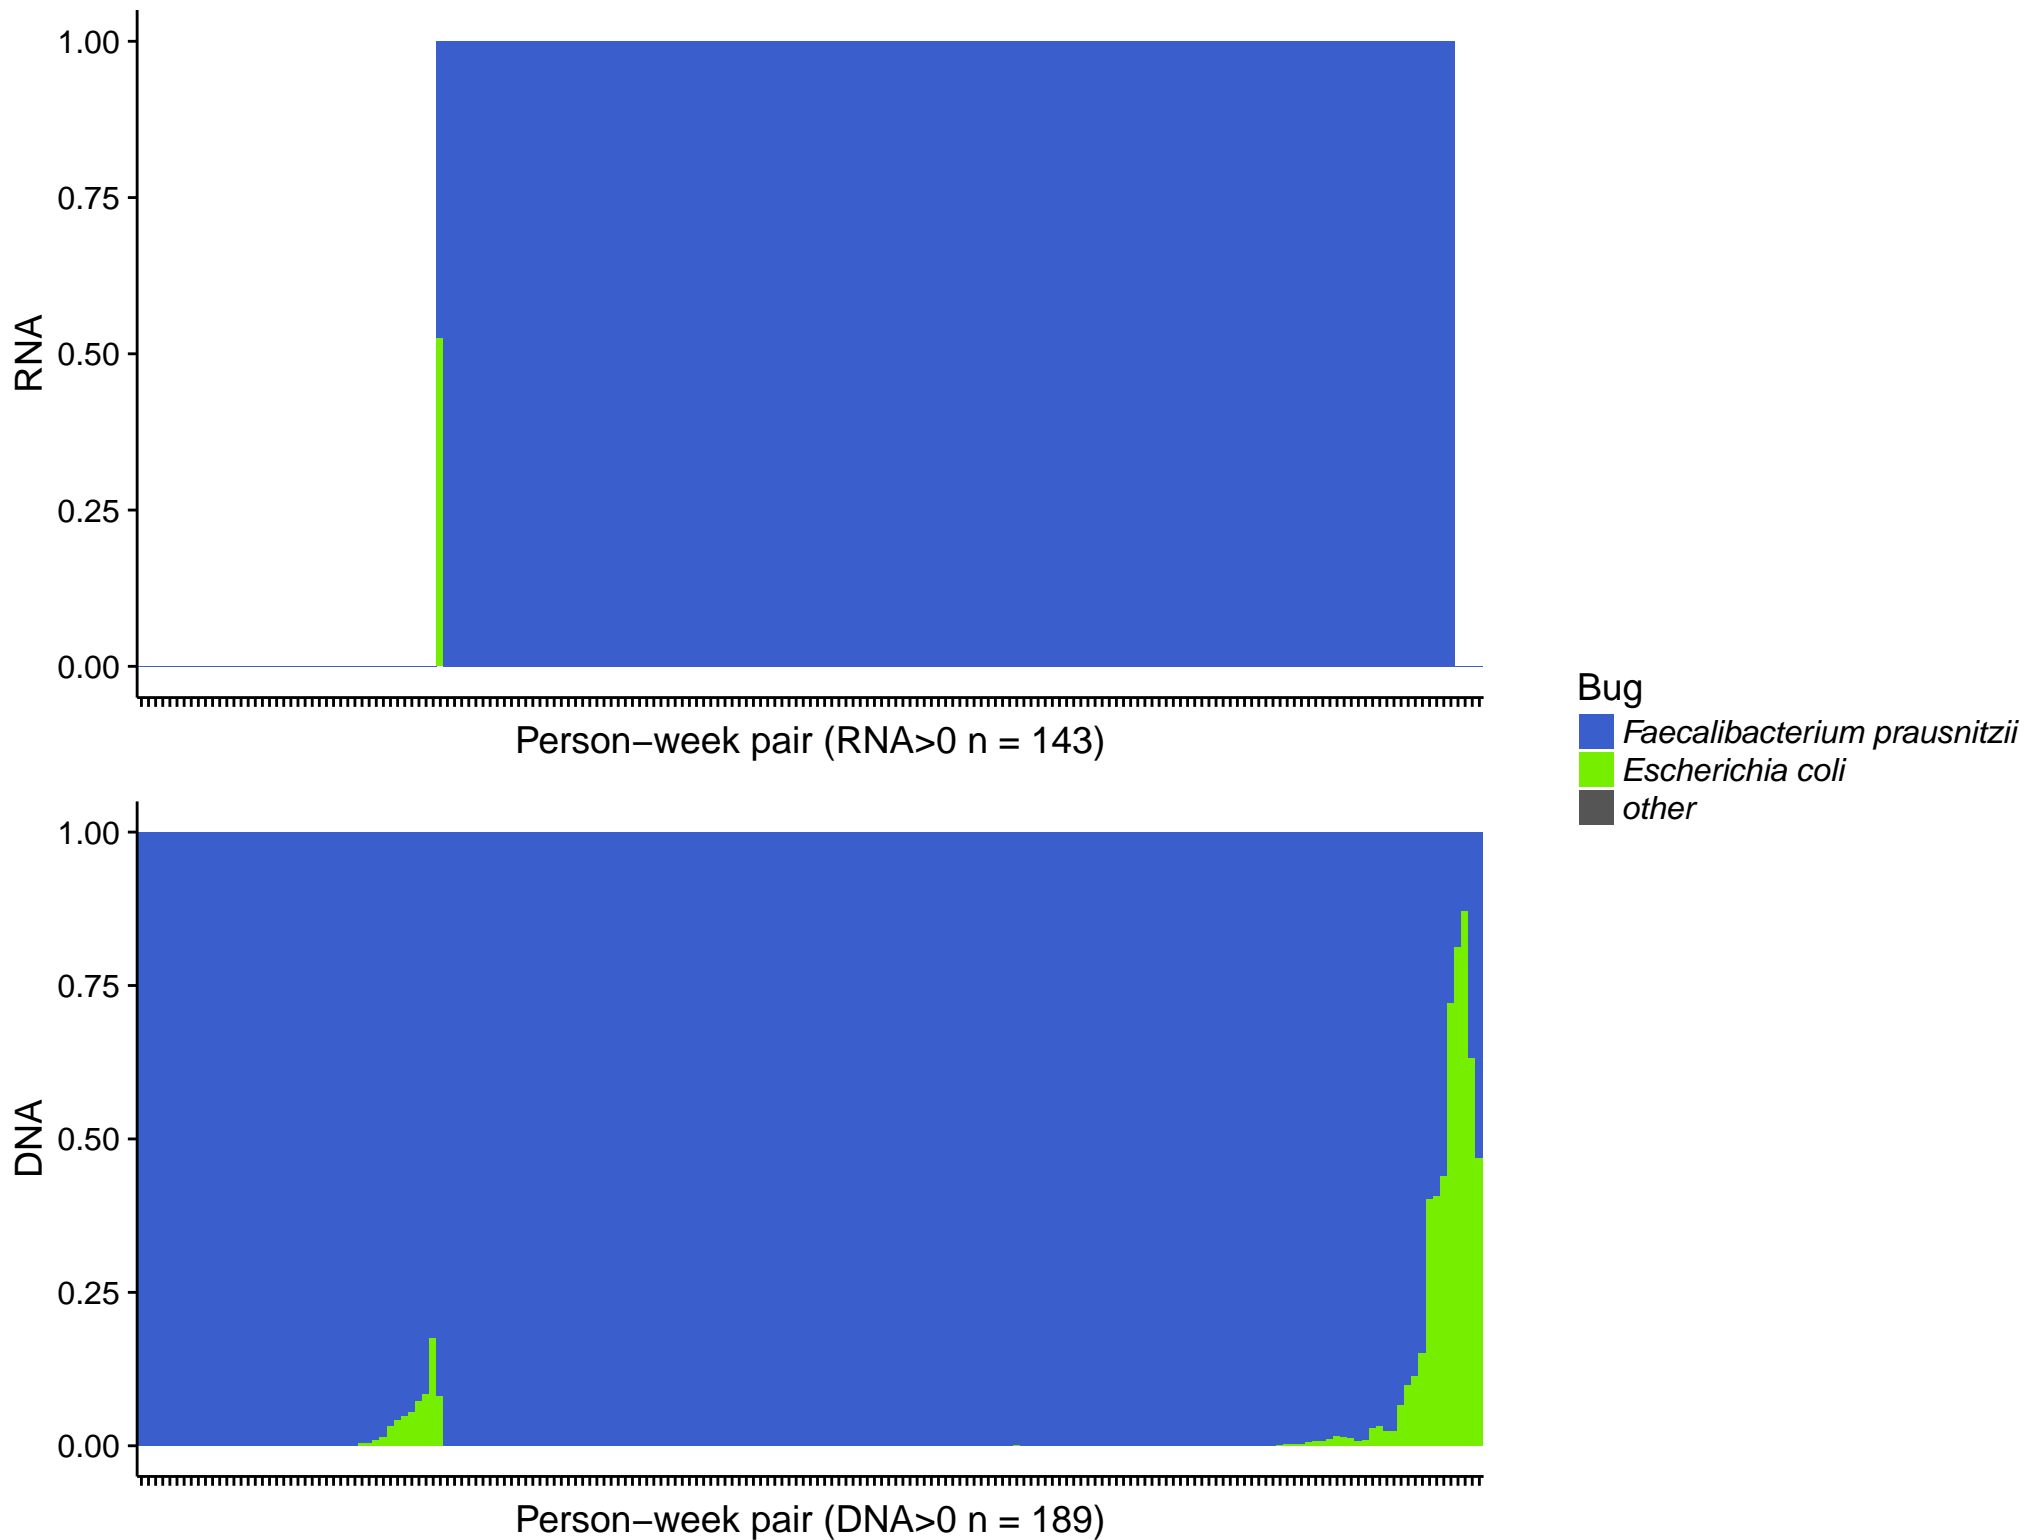

# HISTSYN-PWY: L-histidine biosynthesis

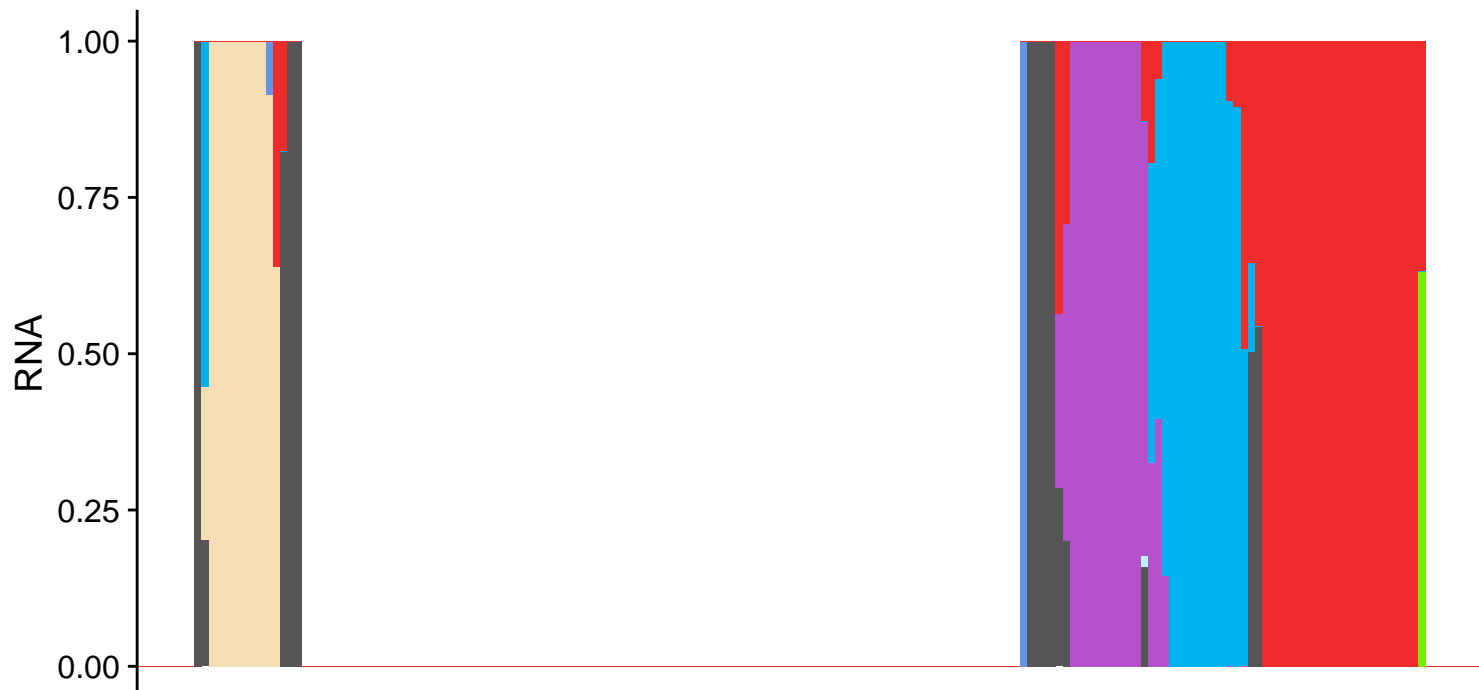

Person-week pair (RNA>0 n = 72)

## Bug

- Bacteroides thetaiotaomicron*
- Eubacterium siraeum*
- Ruminococcus bromii*
- Streptococcus salivarius*
- Anaerostipes hadrus*
- Lachnospiraceae bacterium 5\_1\_63FAA*
- Escherichia coli*
- Klebsiella pneumoniae*
- Methanobrevibacter smithii*
- other

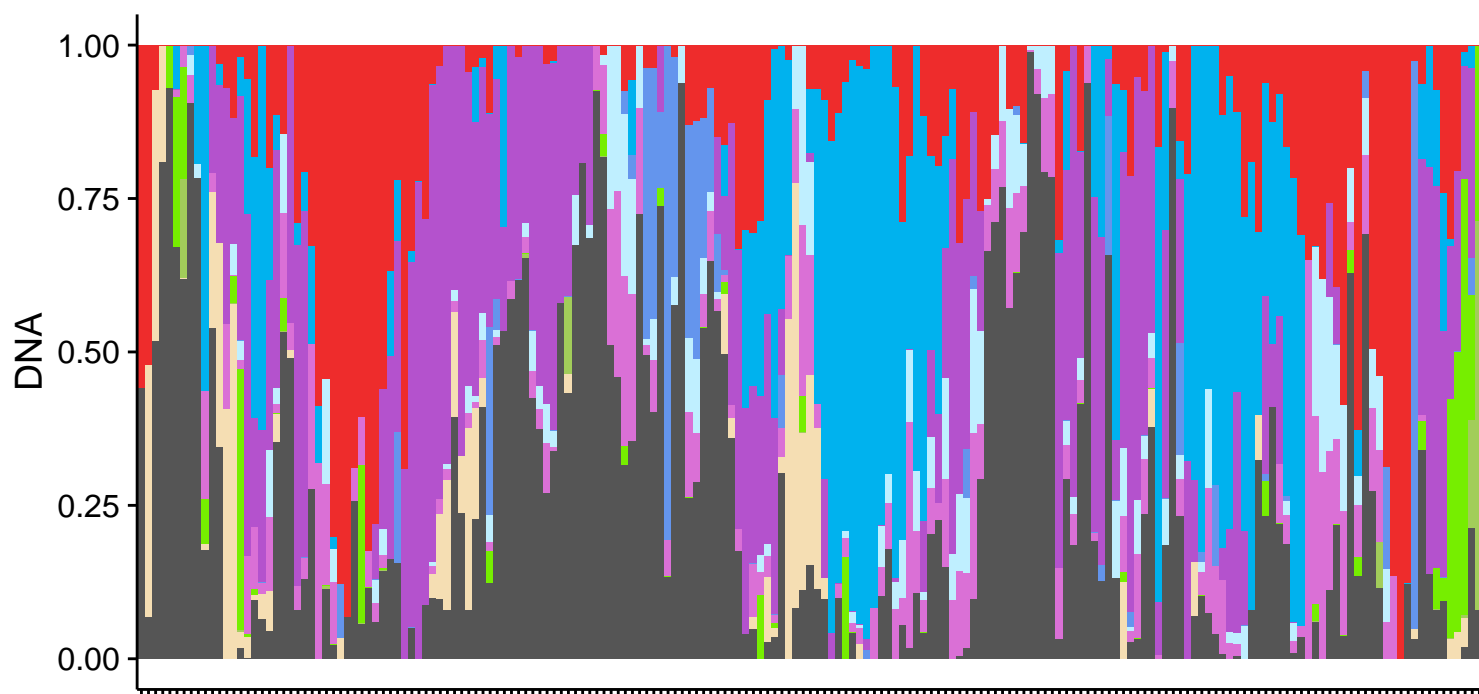

Person-week pair (DNA>0 n = 189)

# PWY-3001: superpathway of L-isoleucine biosynthesis I

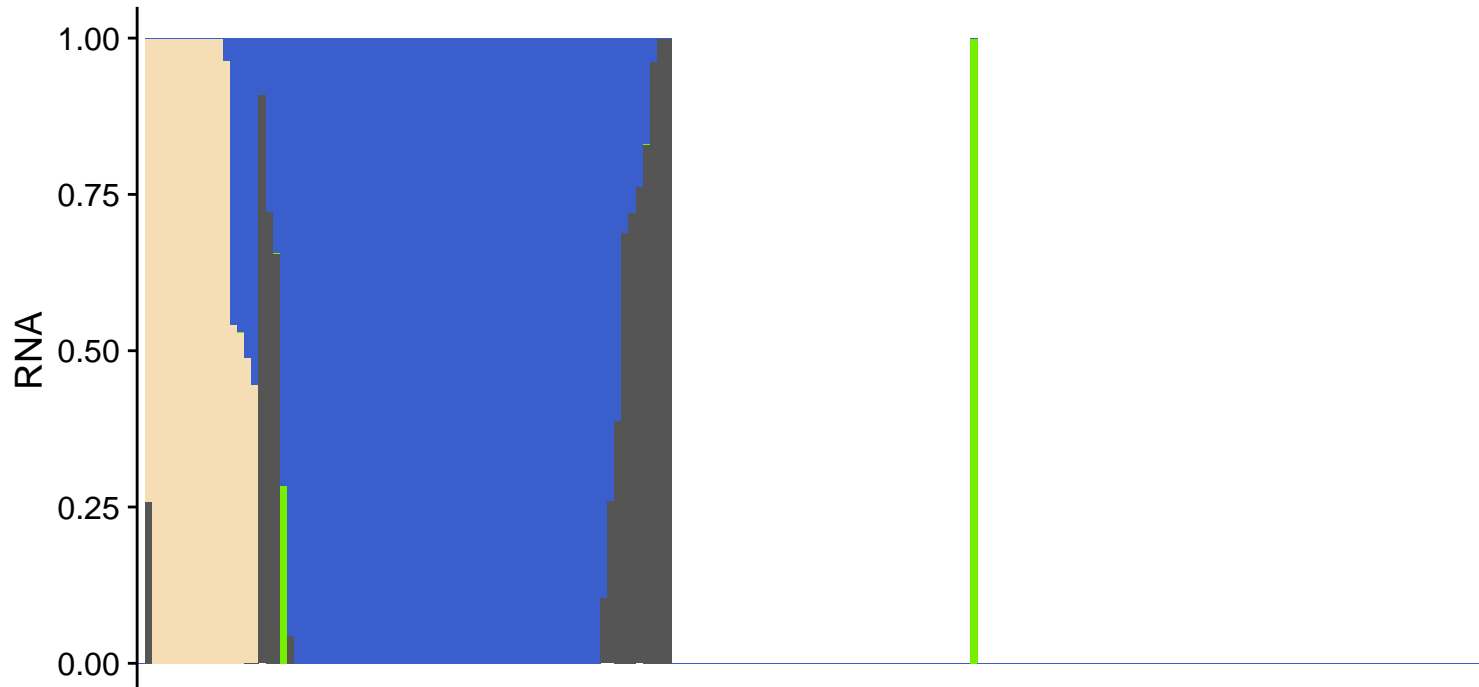

Person-week pair (RNA>0 n = 75)

Bug

- Faecalibacterium prausnitzii*
- Escherichia coli*
- Haemophilus parainfluenzae*
- Methanobrevibacter smithii*
- other

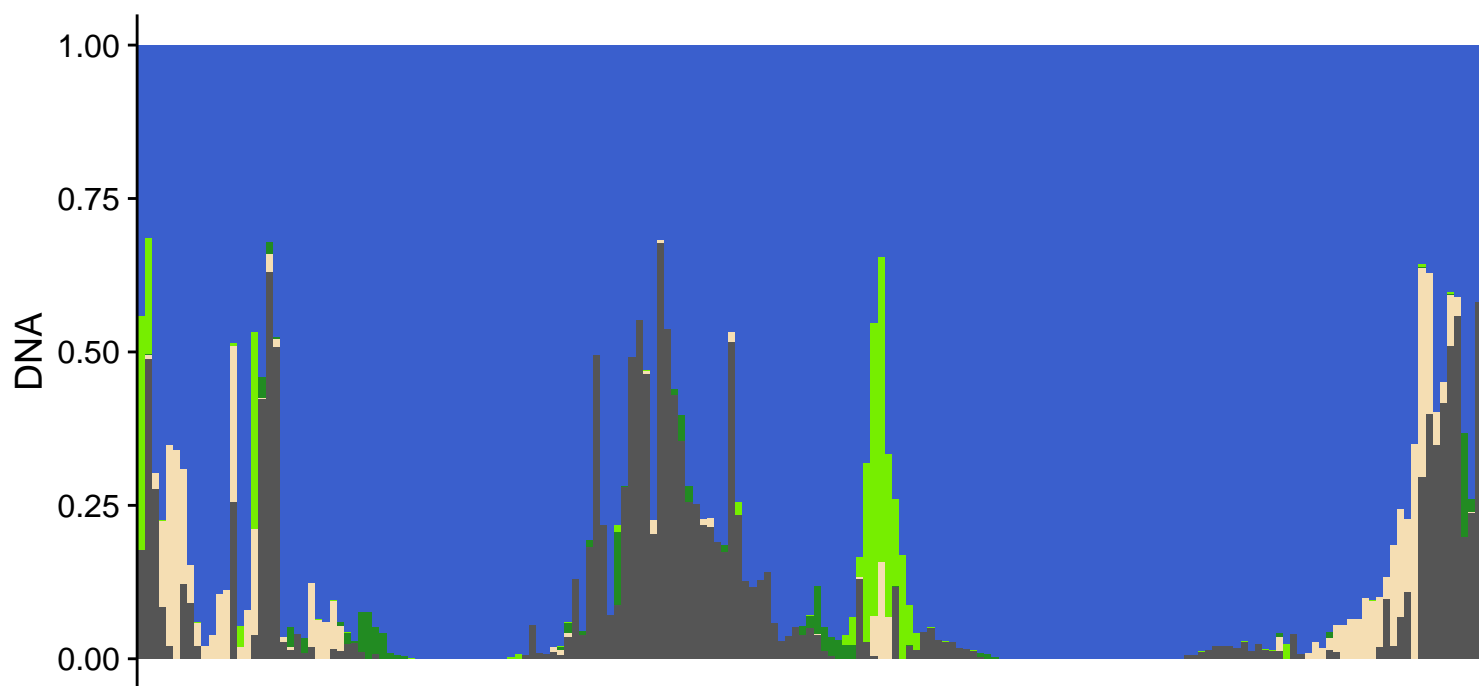

Person-week pair (DNA>0 n = 189)

# PWY-724: superpathway of L-lysine, L-threonine and L-methionine biosynthesis II

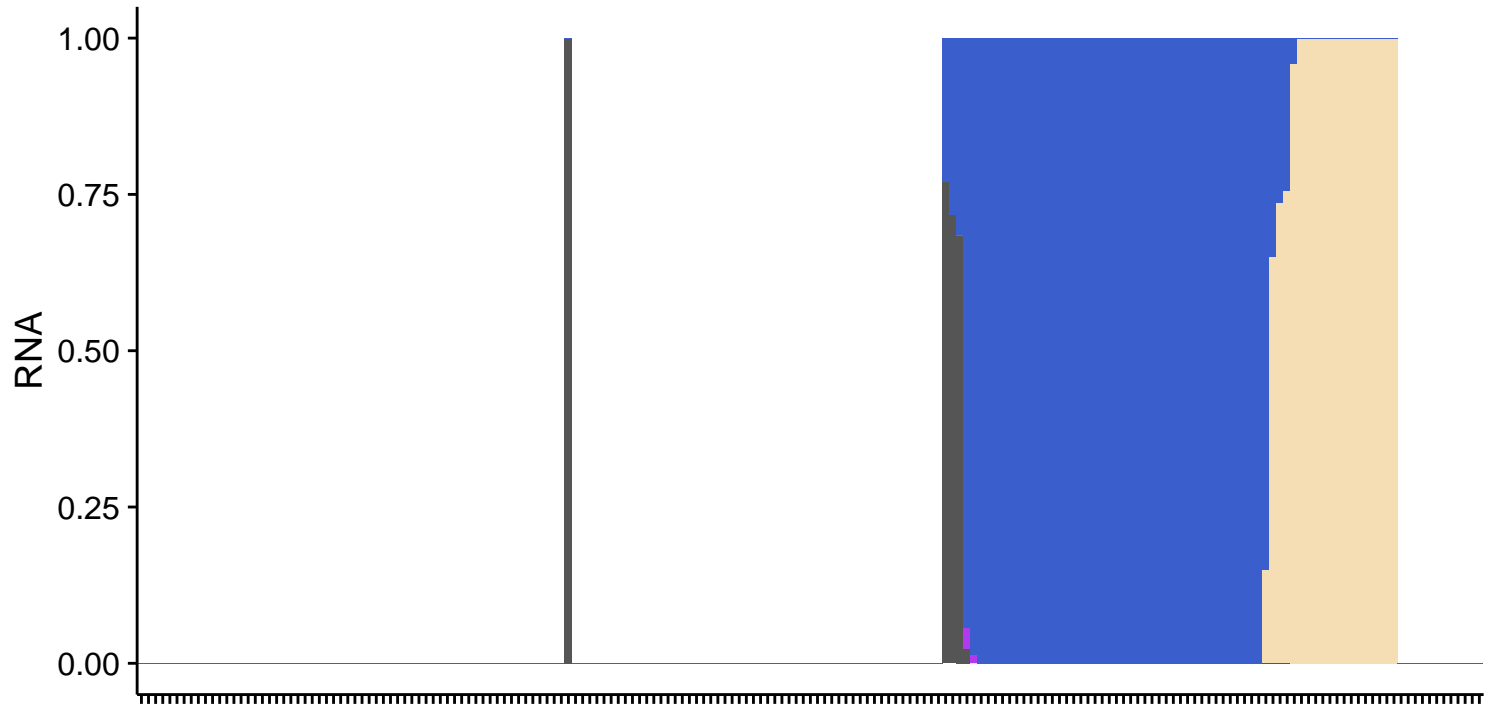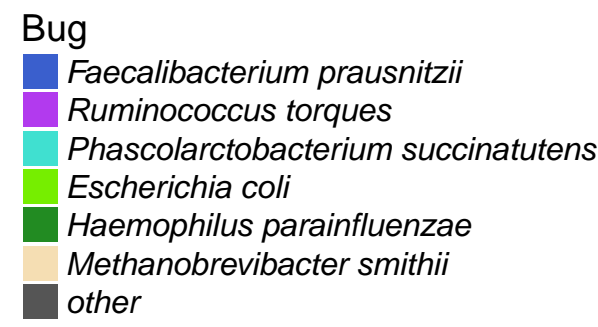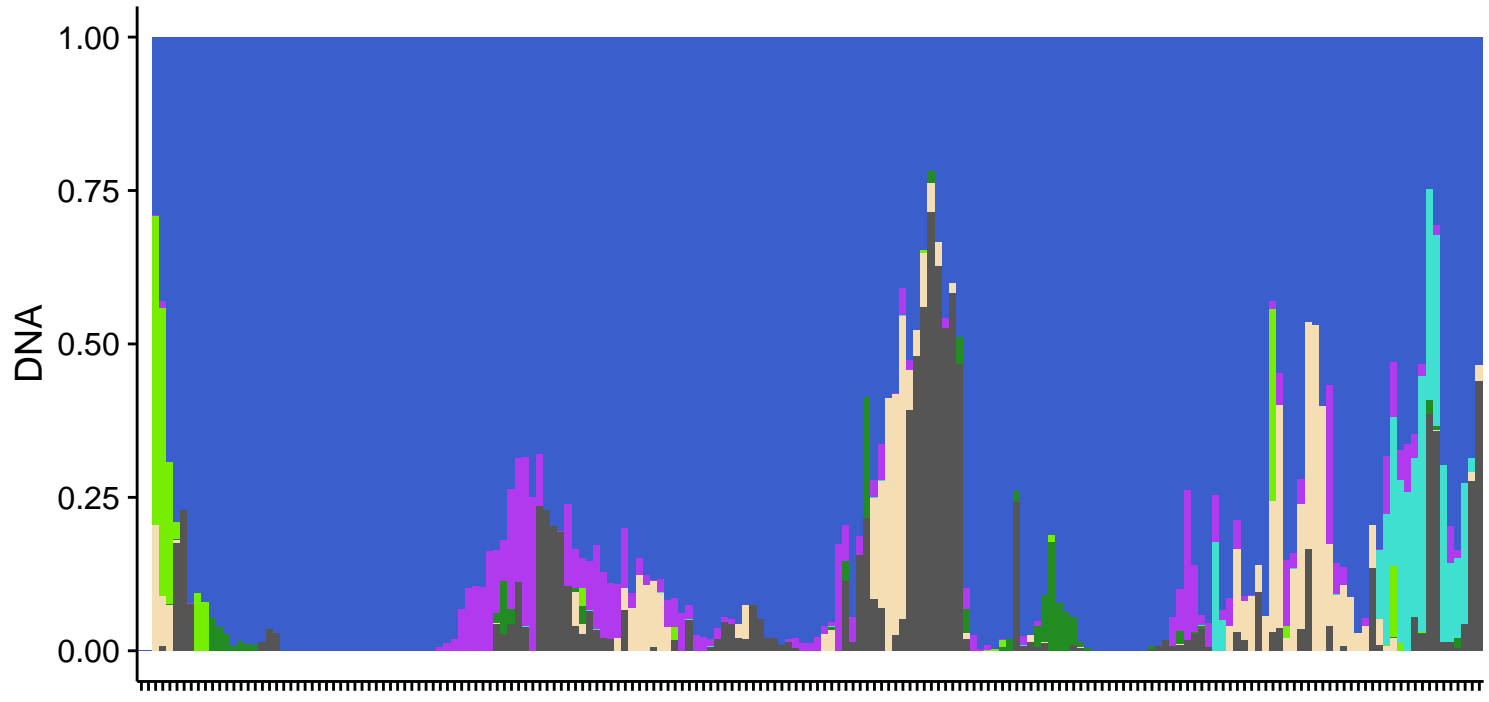

# PWY-6317: galactose degradation I (Leloir pathway)

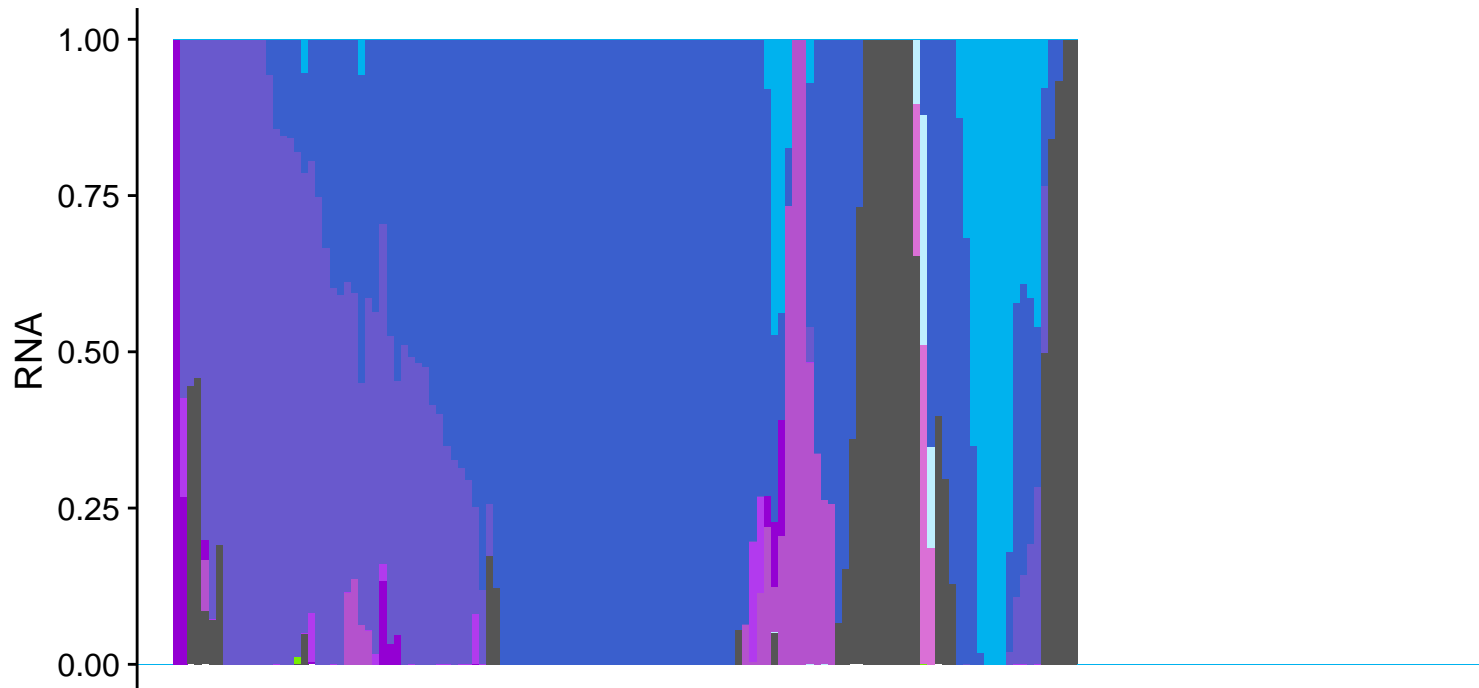

Person-week pair (RNA>0 n = 127)

## Bug

- Eubacterium siraeum*
- Faecalibacterium prausnitzii*
- Roseburia intestinalis*
- Ruminococcus torques*
- Ruminococcus obeum*
- Ruminococcus bromii*
- Anaerostipes hadrus*
- Lachnospiraceae bacterium 5\_1\_63FAA*
- Escherichia coli*
- other

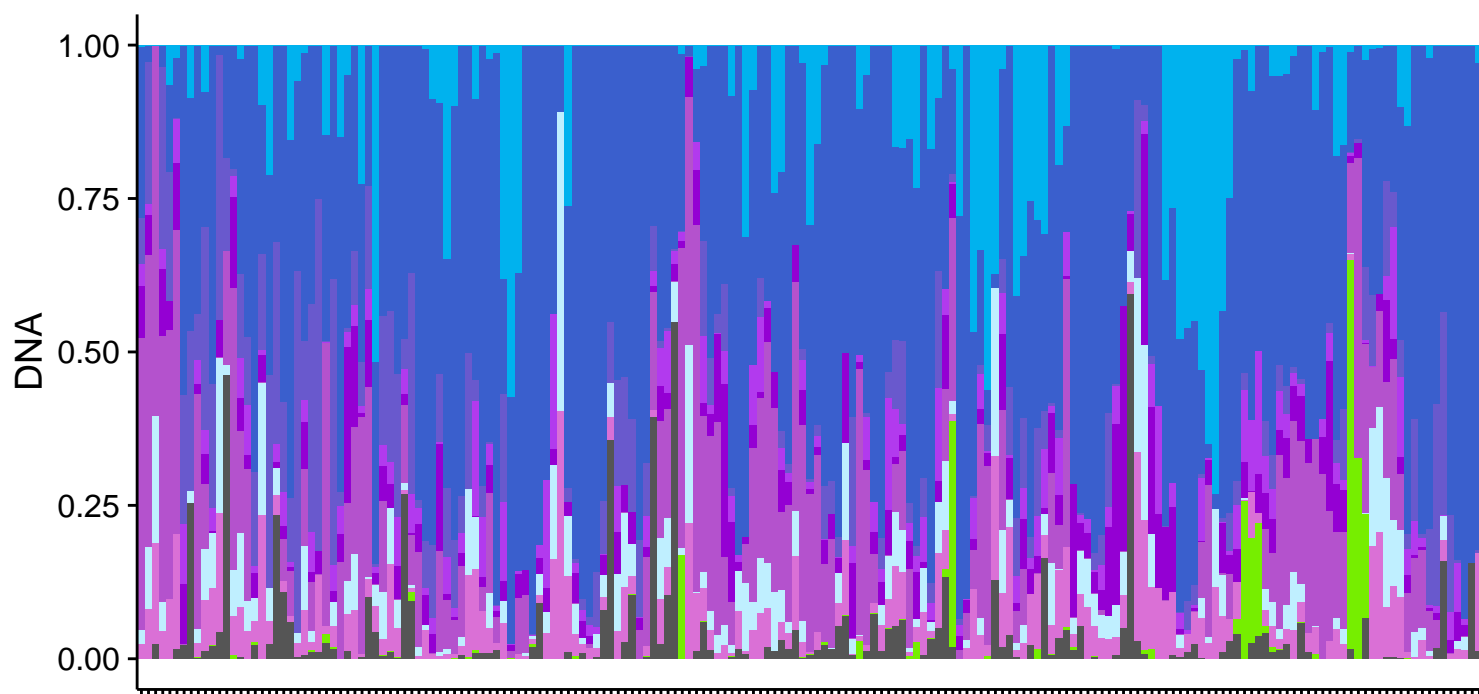

Person-week pair (DNA>0 n = 189)

# BRANCHED-CHAIN-AA-SYN-PWY: superpathway of branched amino acid biosynthesis

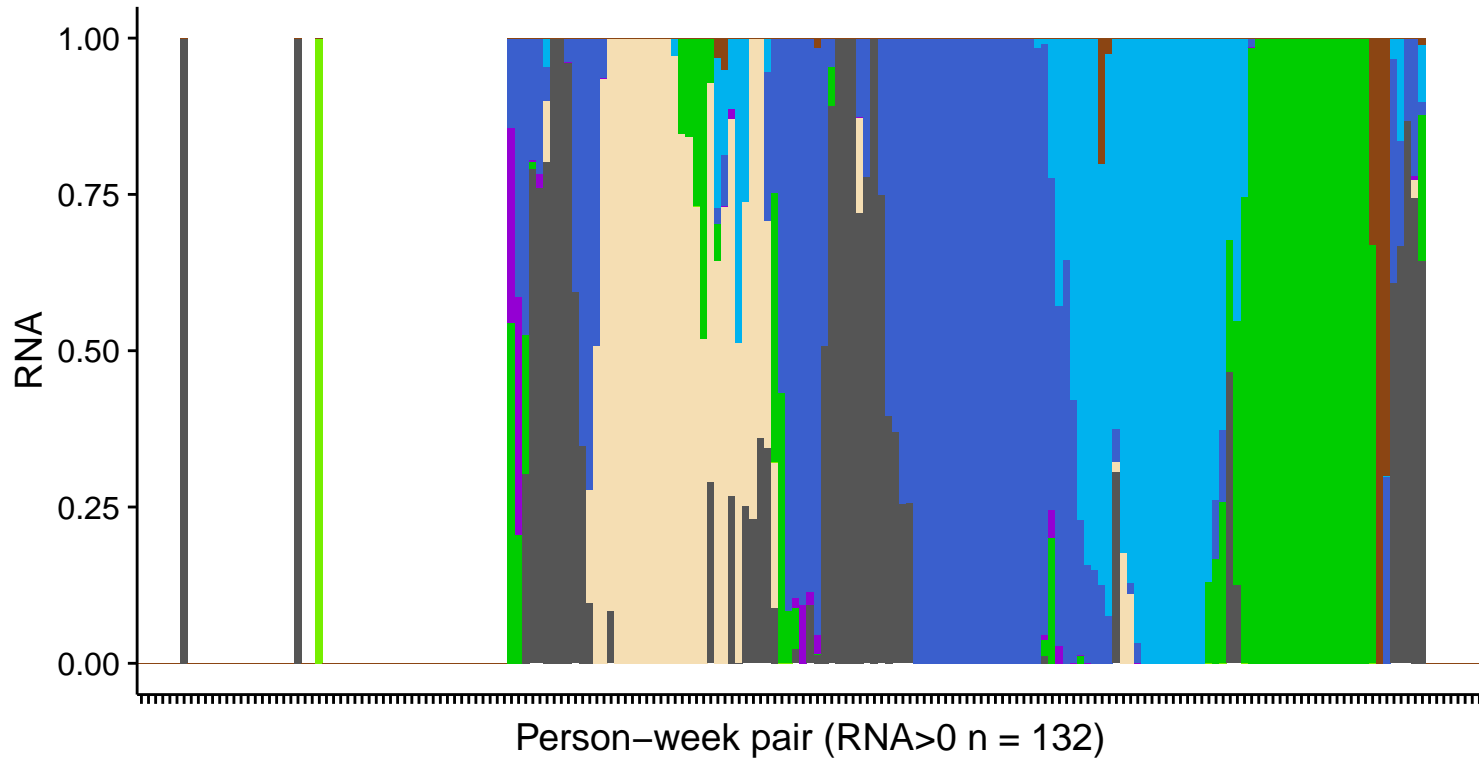

## Bug

- Odoribacter splanchnicus*
- Eubacterium siraeum*
- Faecalibacterium prausnitzii*
- Ruminococcus obeum*
- Akkermansia muciniphila*
- Escherichia coli*
- Methanobrevibacter smithii*
- other*

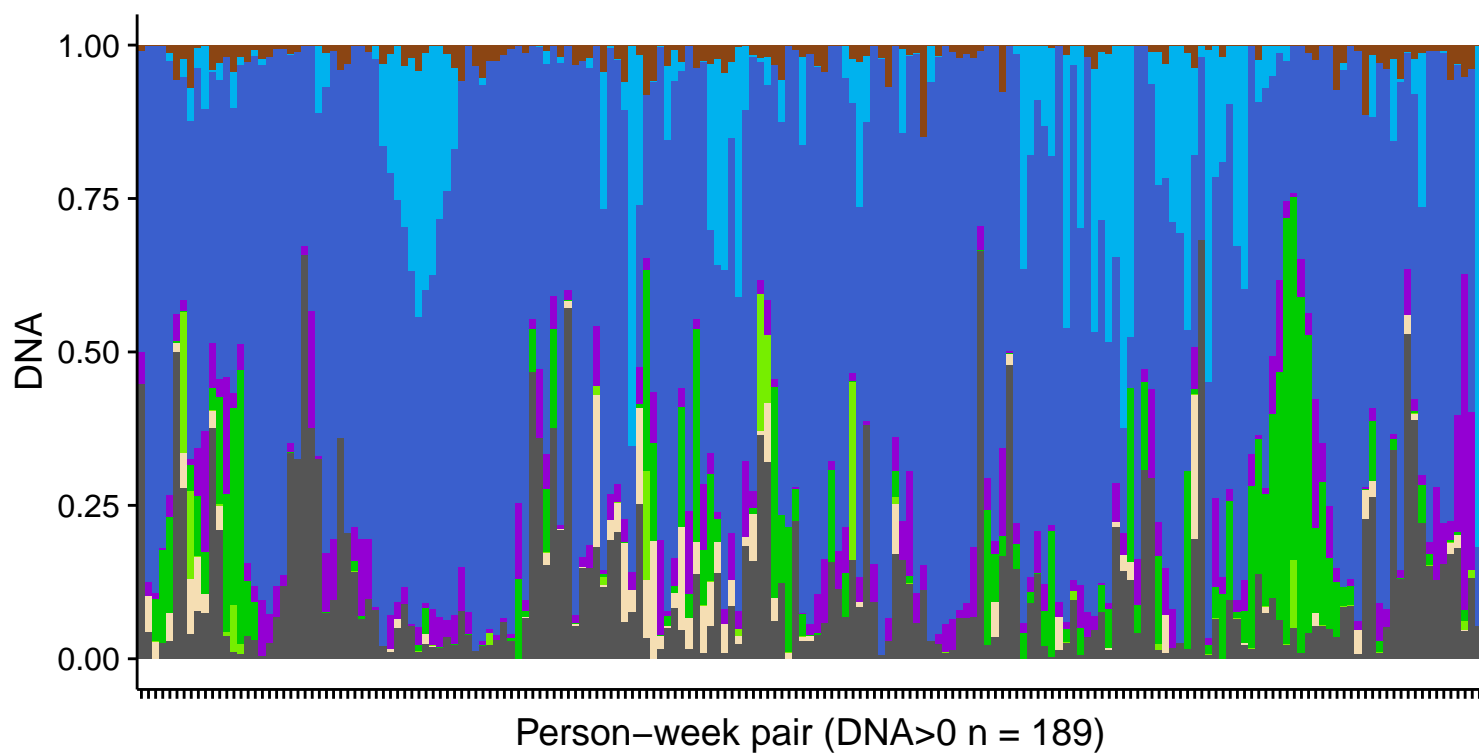



# THRESYN-PWY: superpathway of L-threonine biosynthesis

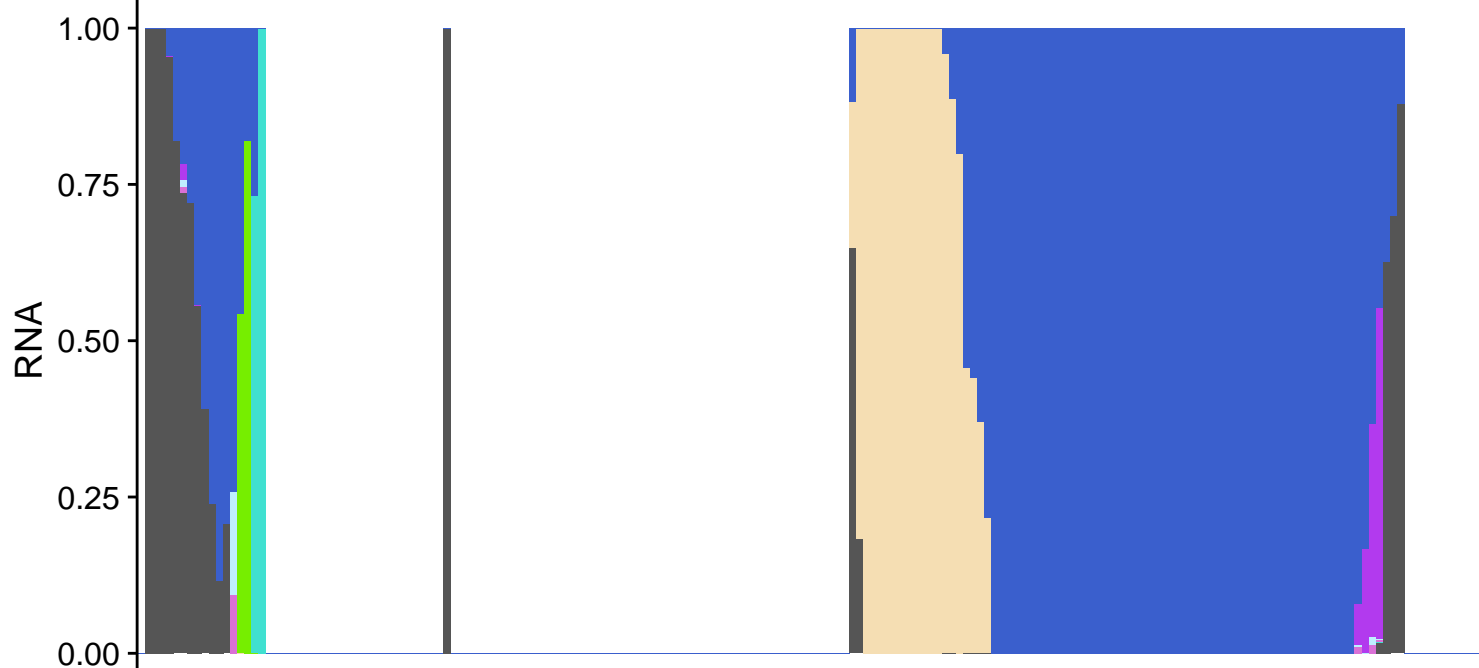

Person-week pair (RNA>0 n = 96)

## Bug

- *Faecalibacterium prausnitzii*
- *Ruminococcus torques*
- *Anaerostipes hadrus*
- *Lachnospiraceae bacterium 5\_1\_63FAA*
- *Phascolarctobacterium succinatutens*
- *Rothia mucilaginosa*
- *Escherichia coli*
- *Klebsiella pneumoniae*
- *Haemophilus parainfluenzae*
- *Methanobrevibacter smithii*
- *other*

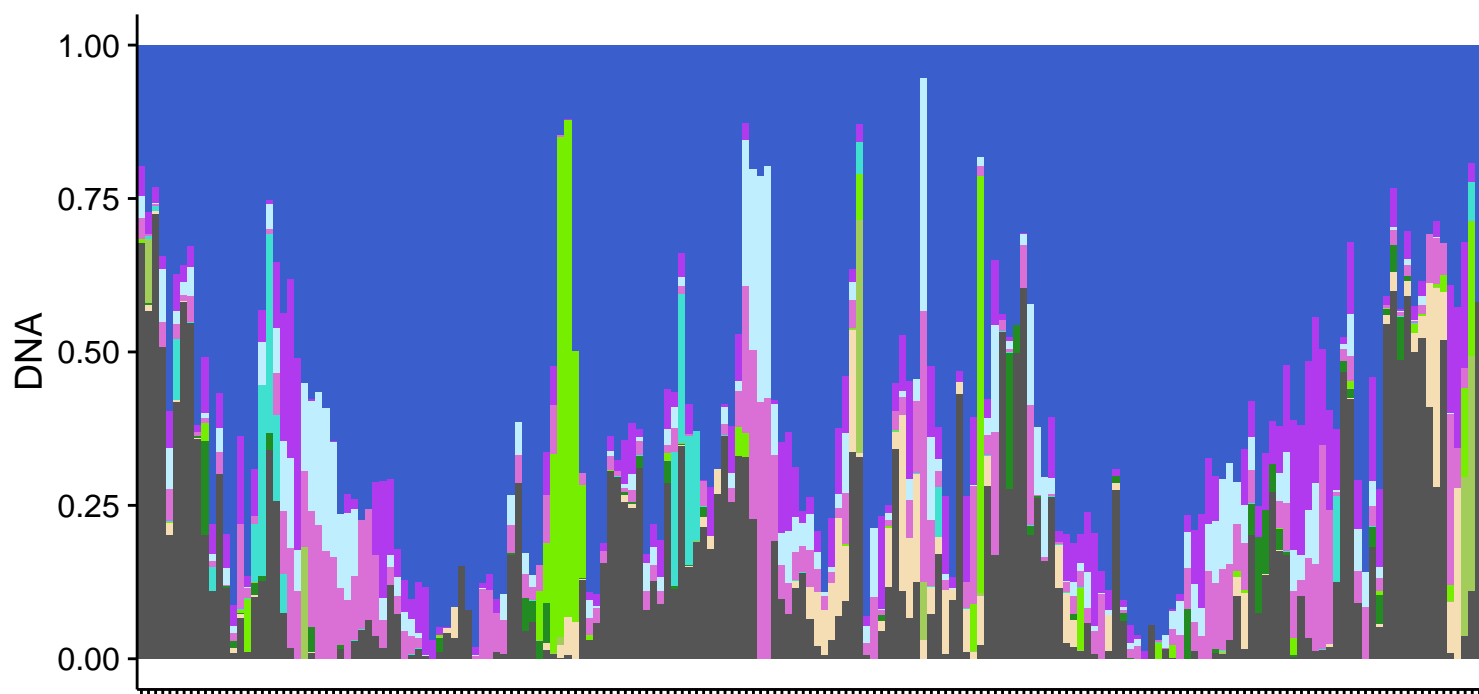

Person-week pair (DNA>0 n = 189)

# ILEUSYN-PWY: L-isoleucine biosynthesis I (from threonine)

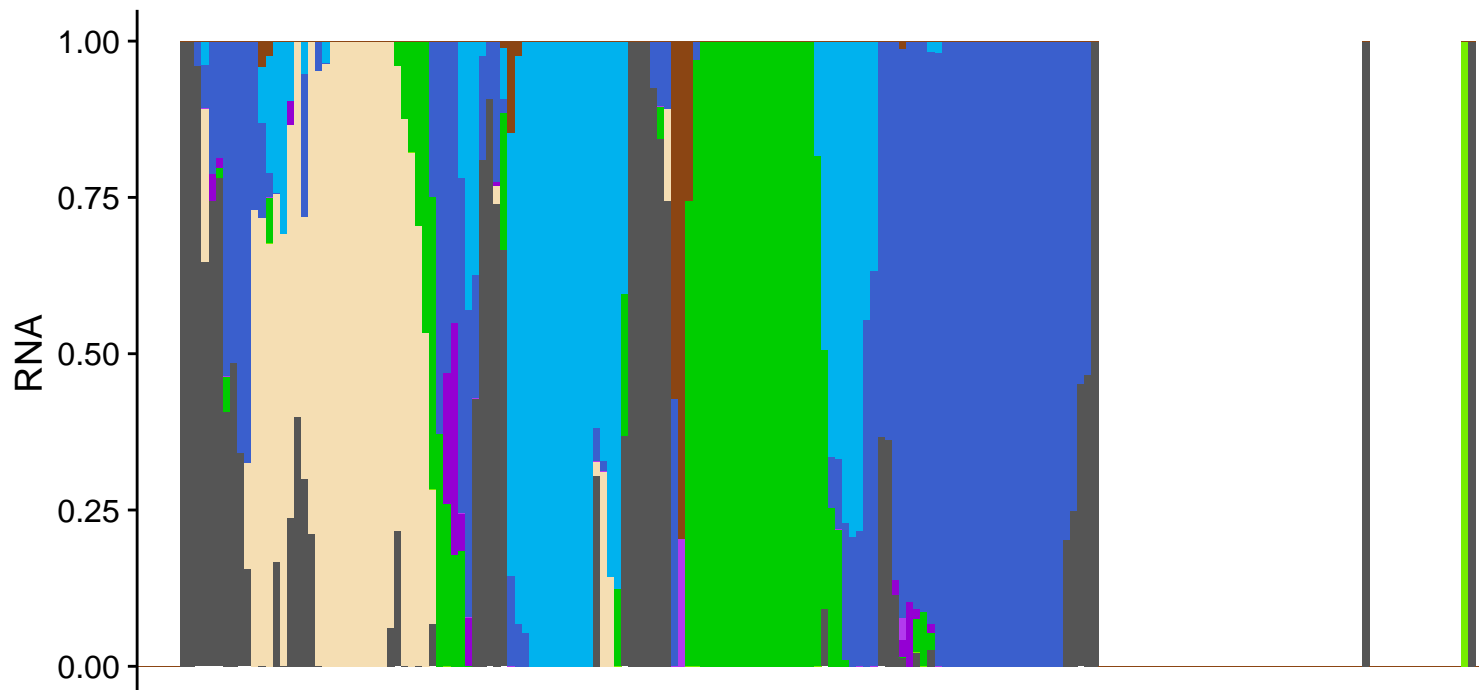

Person-week pair (RNA>0 n = 132)

## Bug

- Odoribacter splanchnicus*
- Eubacterium siraeum*
- Faecalibacterium prausnitzii*
- Ruminococcus torques*
- Ruminococcus obeum*
- Akkermansia muciniphila*
- Escherichia coli*
- Methanobrevibacter smithii*
- other

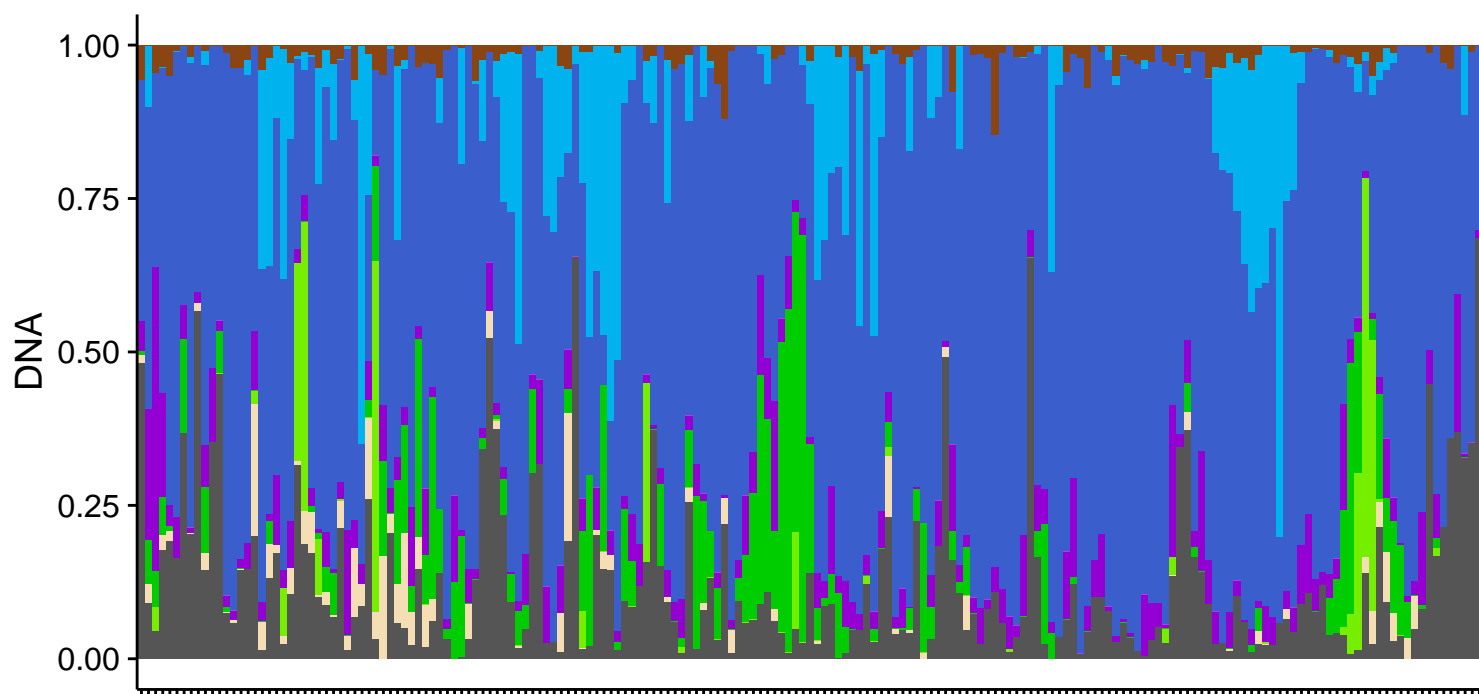

Person-week pair (DNA>0 n = 189)

# PWY-5103: L-isoleucine biosynthesis III

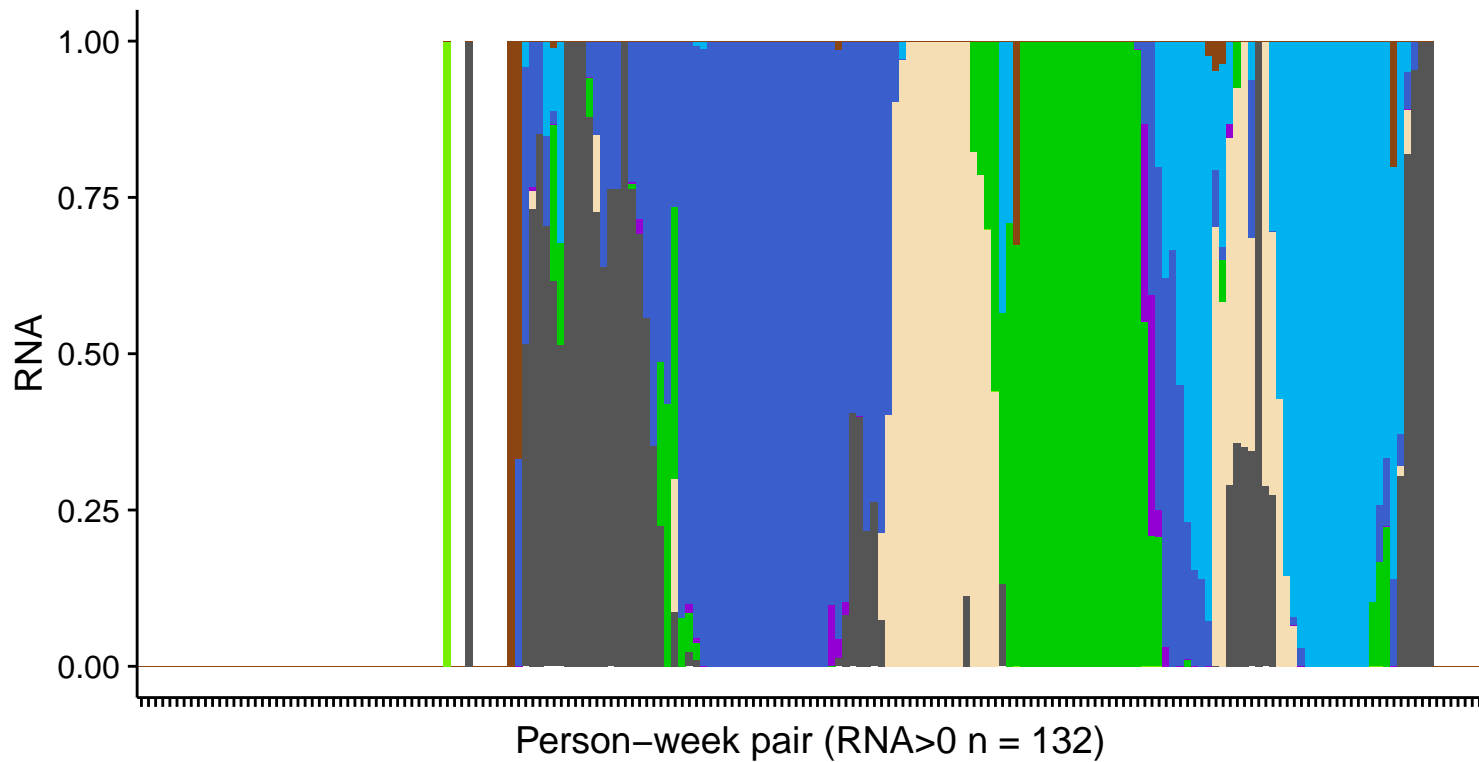

## Bug

- Odoribacter splanchnicus*
- Eubacterium siraeum*
- Faecalibacterium prausnitzii*
- Ruminococcus obeum*
- Akkermansia muciniphila*
- Escherichia coli*
- Methanobrevibacter smithii*
- other

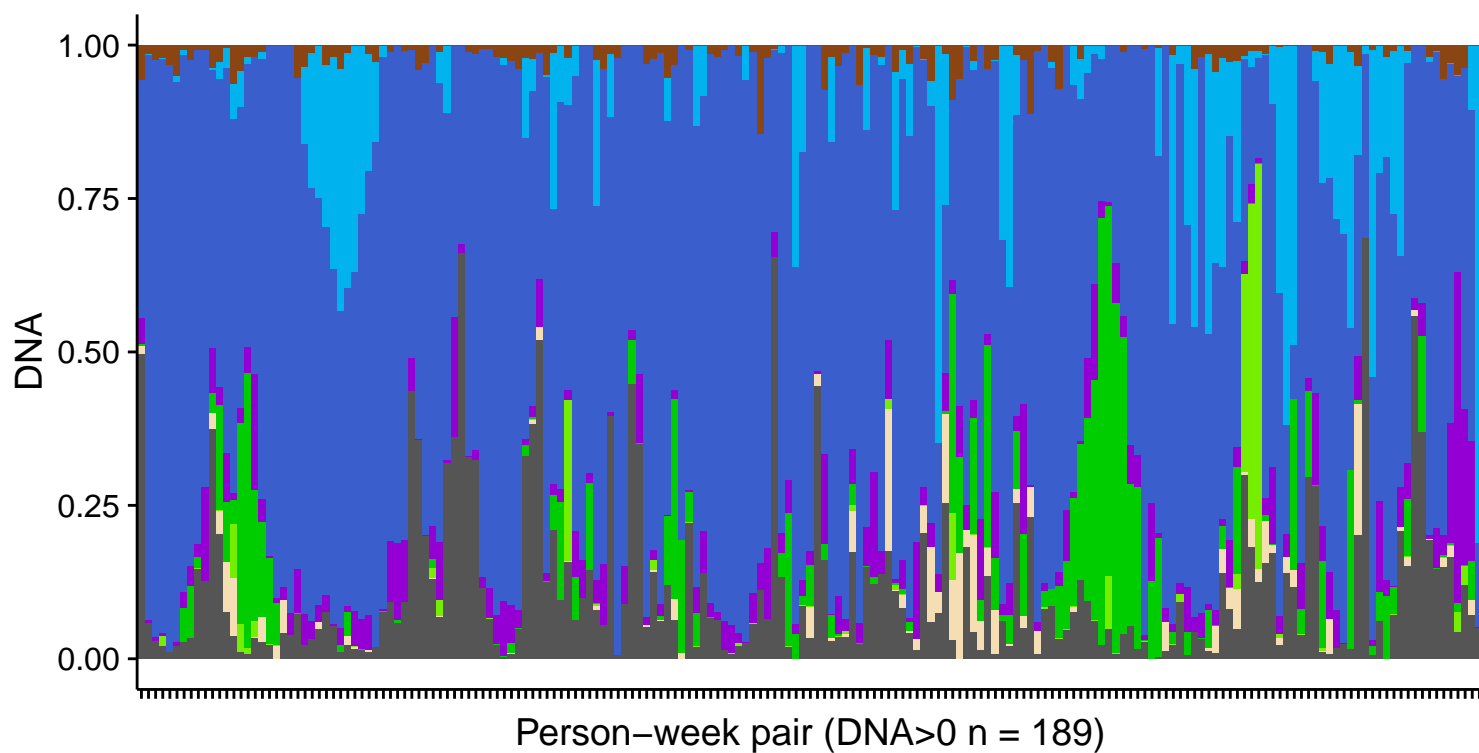

# PWY-4242: pantothenate and coenzyme A biosynthesis III

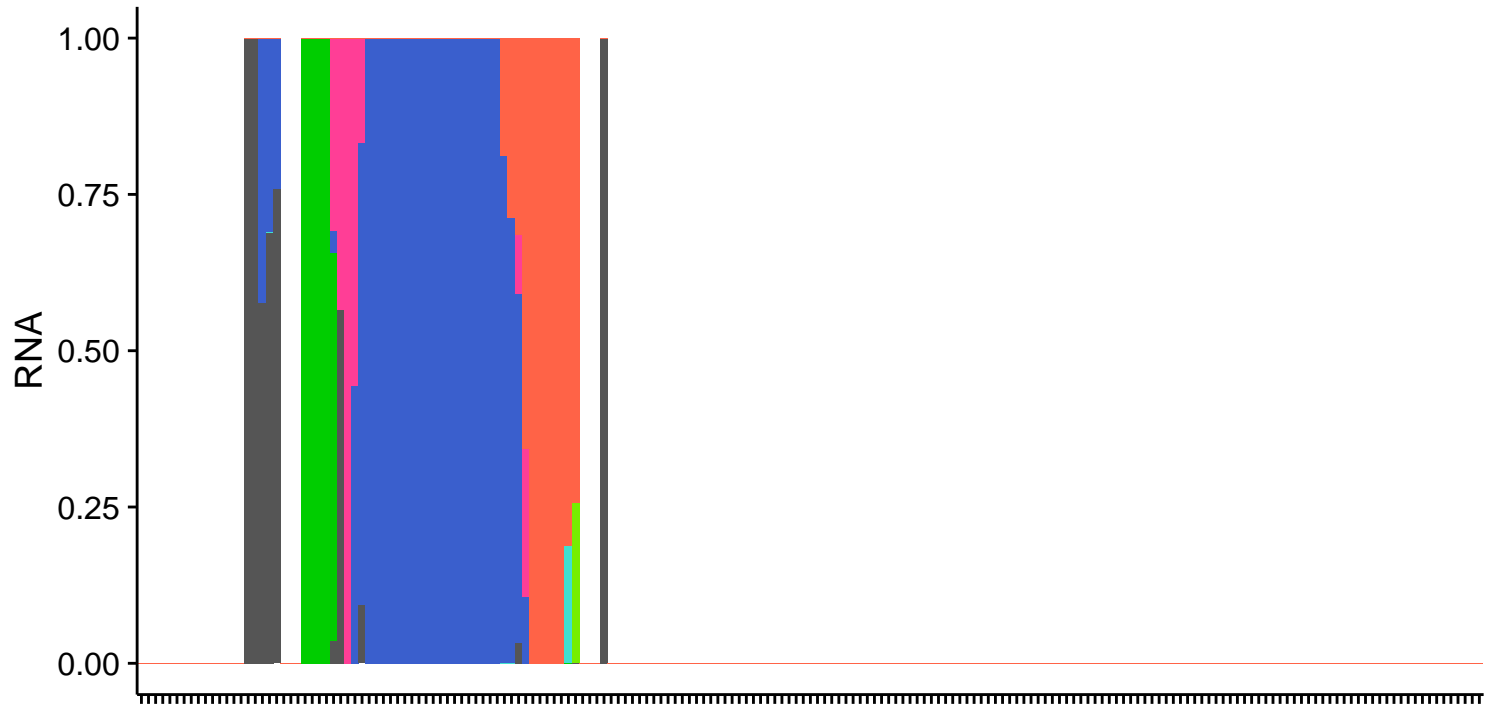

Person-week pair (RNA>0 n = 45)

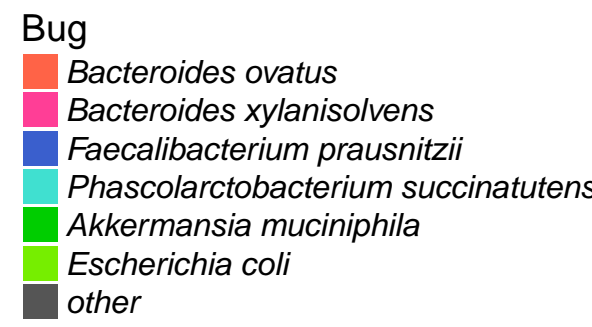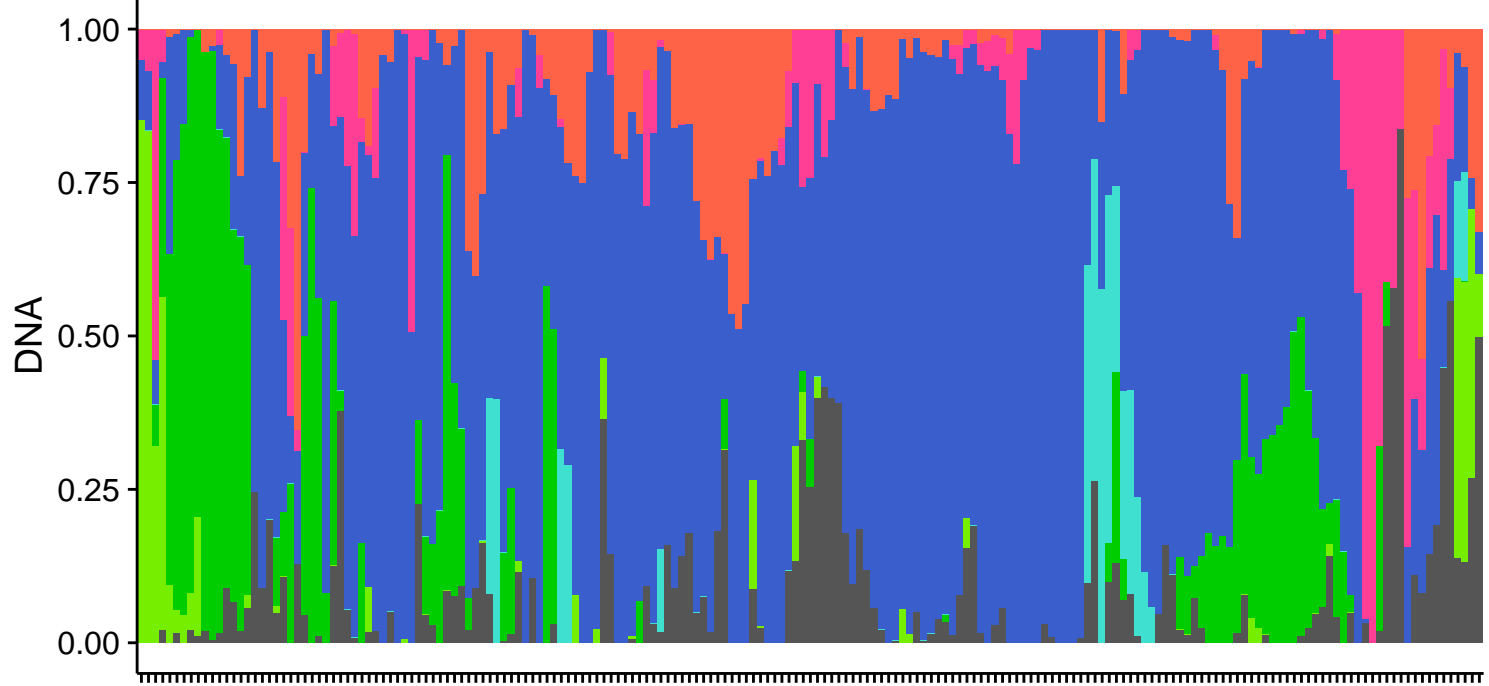

Person-week pair (DNA>0 n = 189)



# LACTOSECAT-PWY: lactose and galactose degradation I

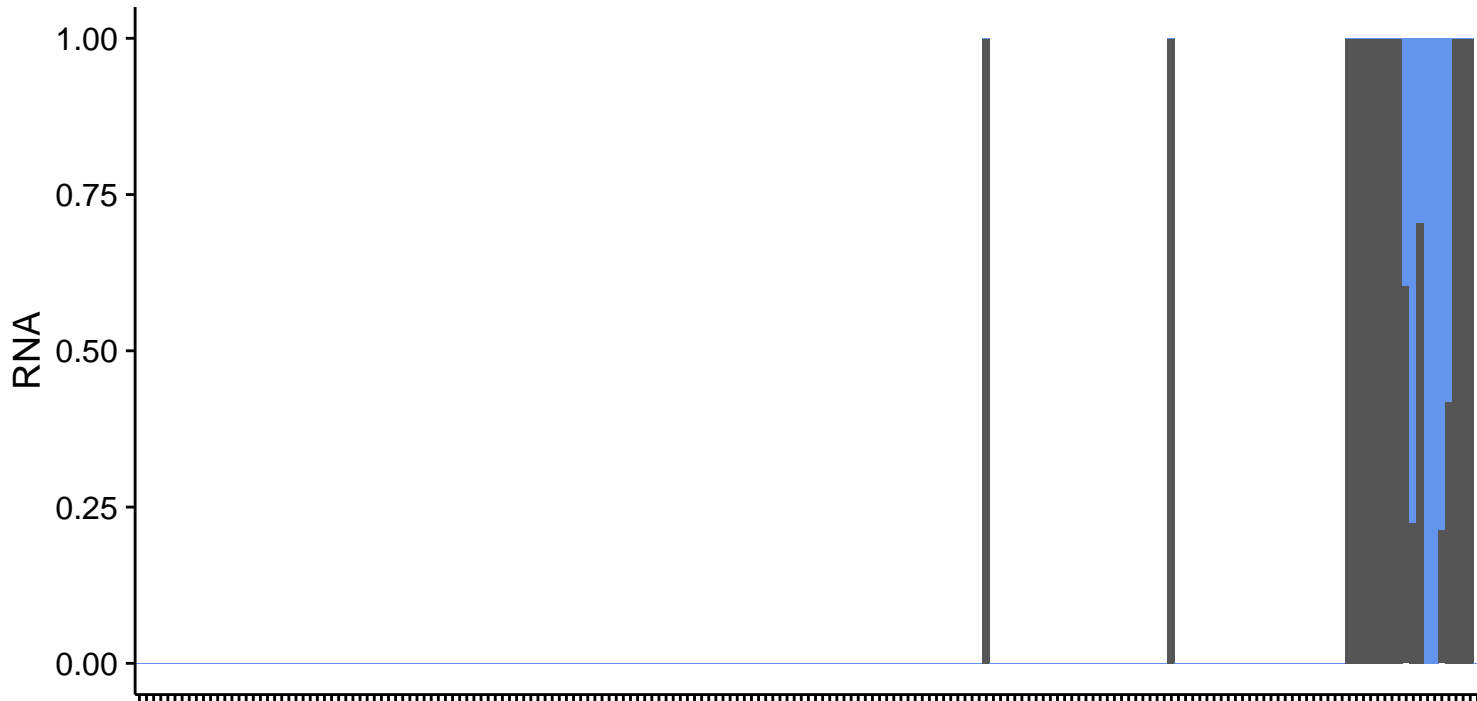

Bug

- Streptococcus salivarius*
- other

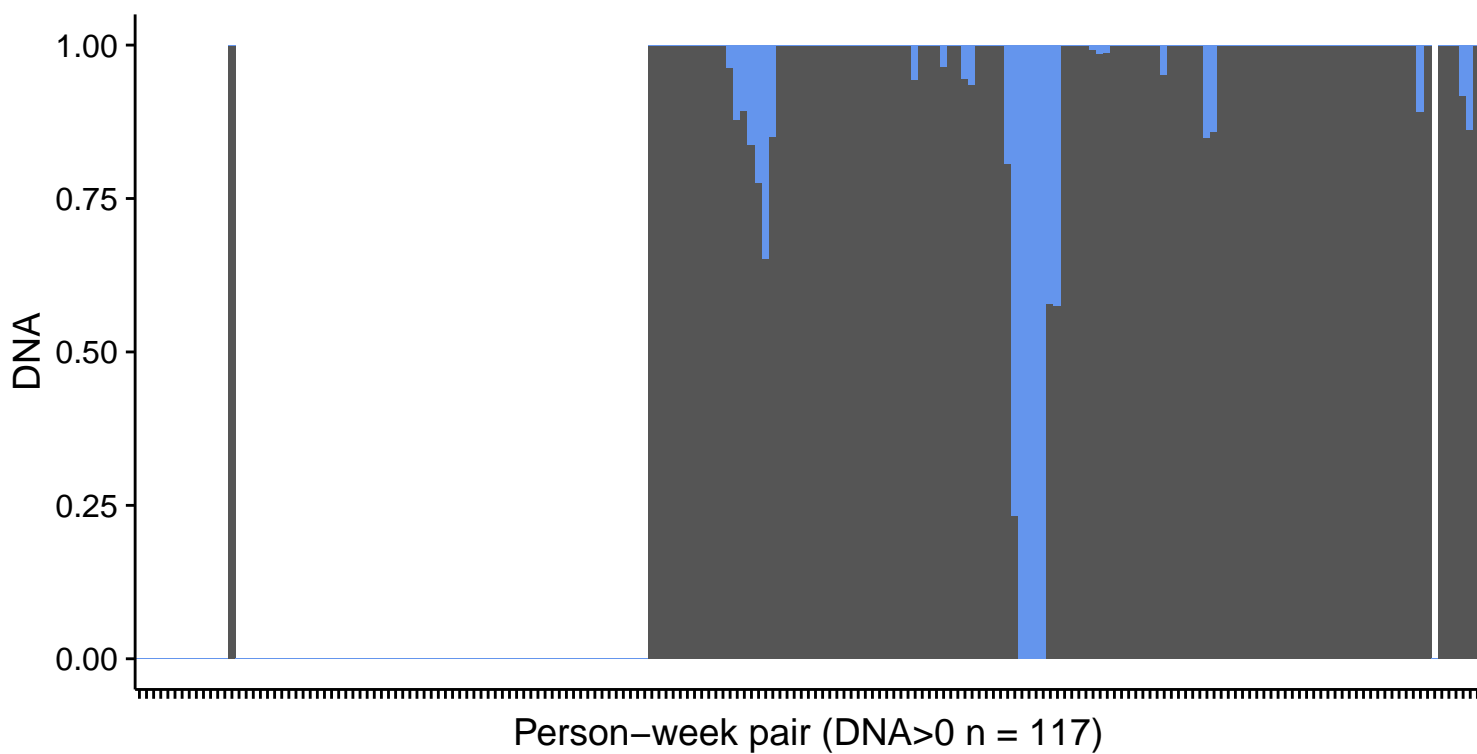

# PANTOSYN-PWY: pantothenate and coenzyme A biosynthesis I

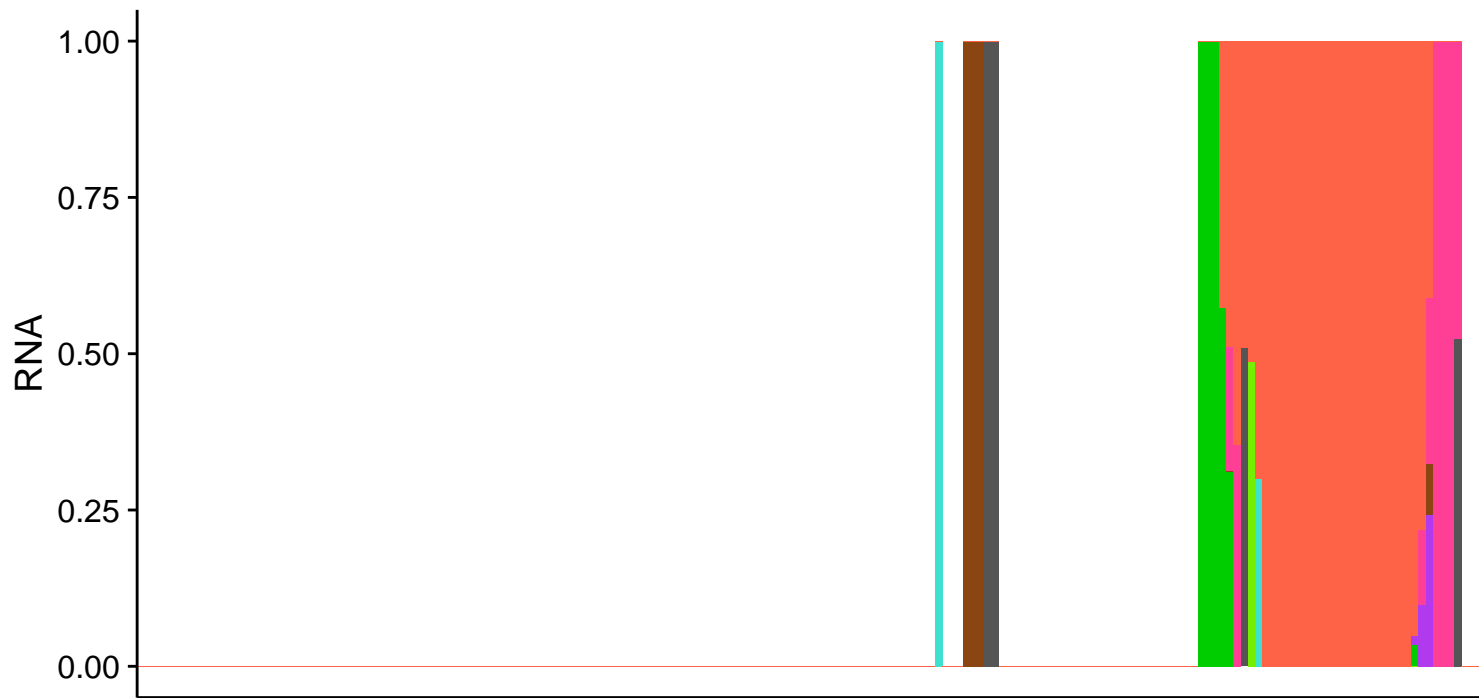

## Bug

- *Bacteroides ovatus*
- *Bacteroides xylanisolvans*
- *Odoribacter splanchnicus*
- *Ruminococcus torques*
- *Anaerostipes hadrus*
- *Lachnospiraceae bacterium 5\_1\_63FAA*
- *Phascolarctobacterium succinatutens*
- *Akkermansia muciniphila*
- *Escherichia coli*
- *other*

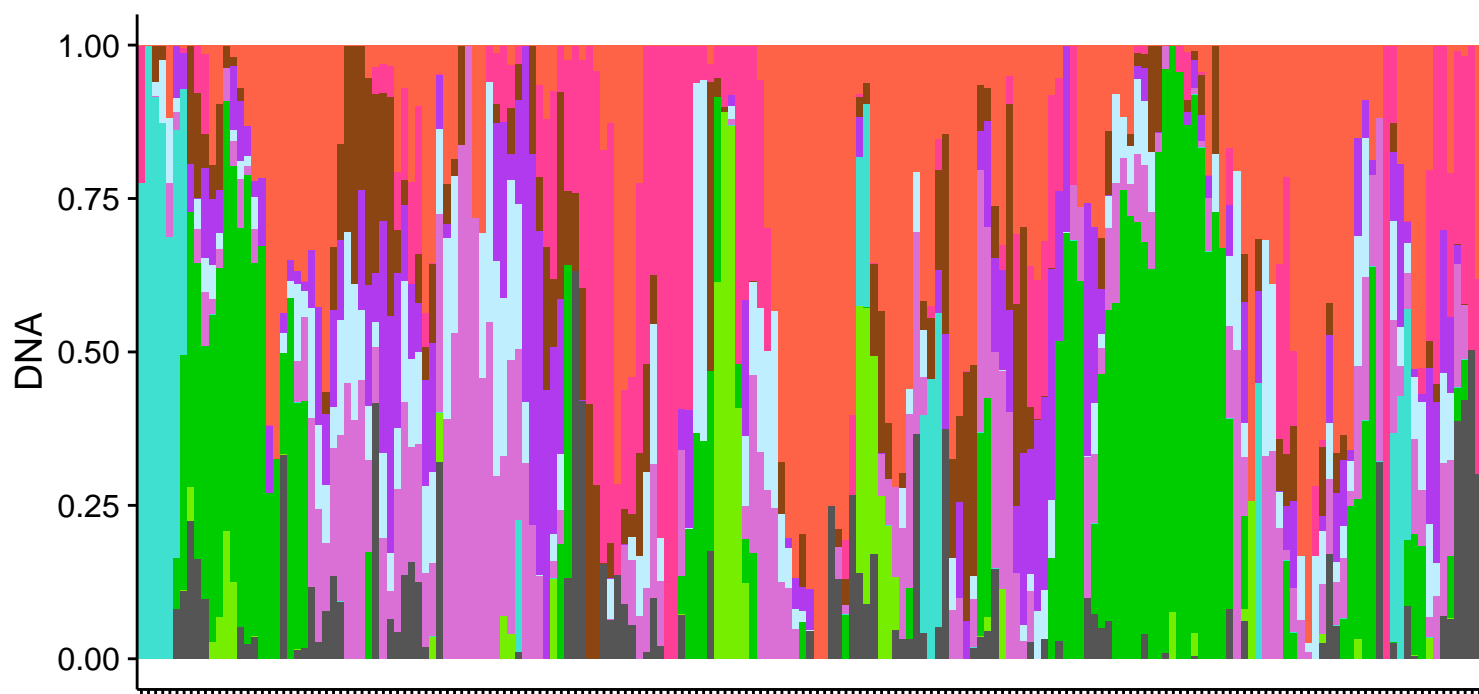

Person-week pair (DNA>0 n = 189)

# PWY-5177: glutaryl-CoA degradation

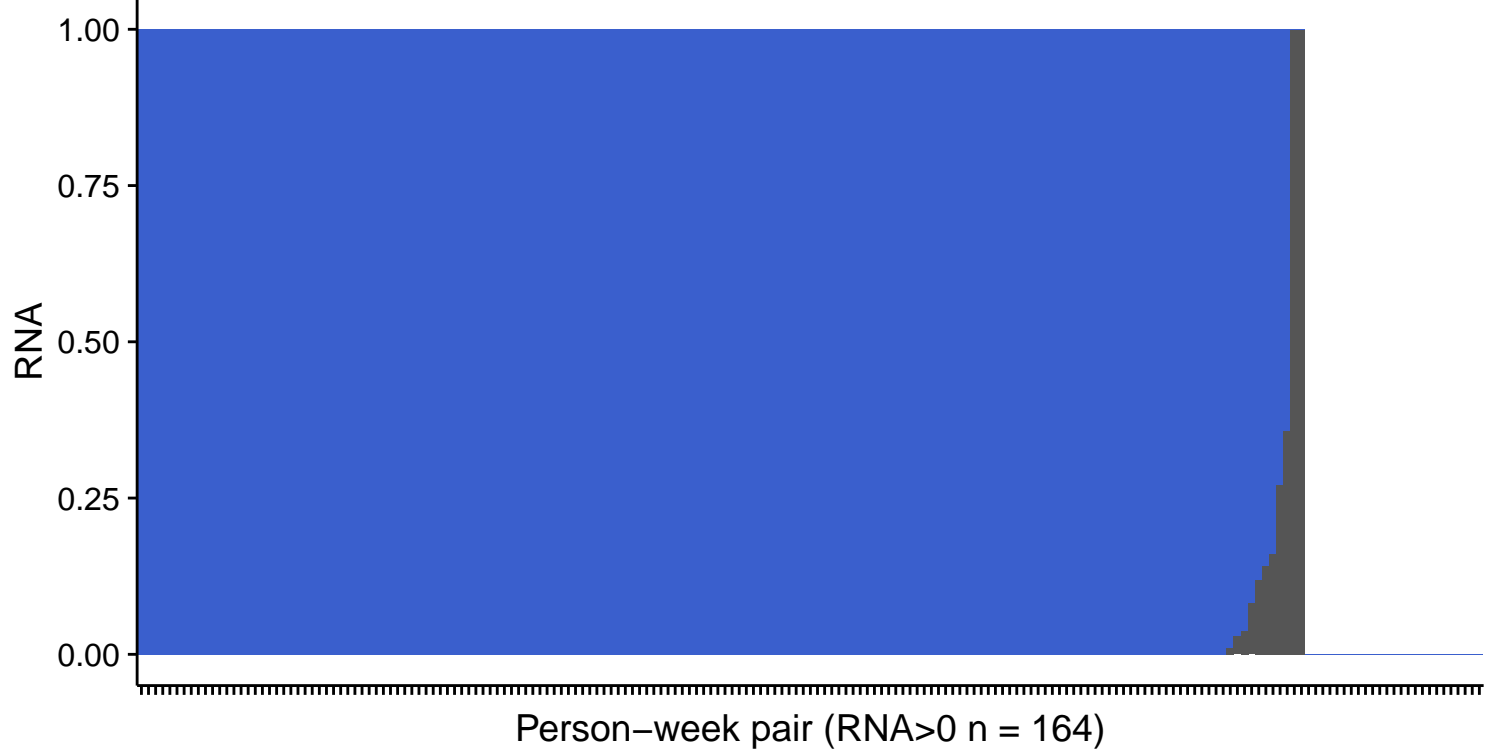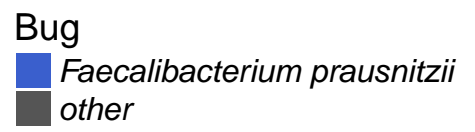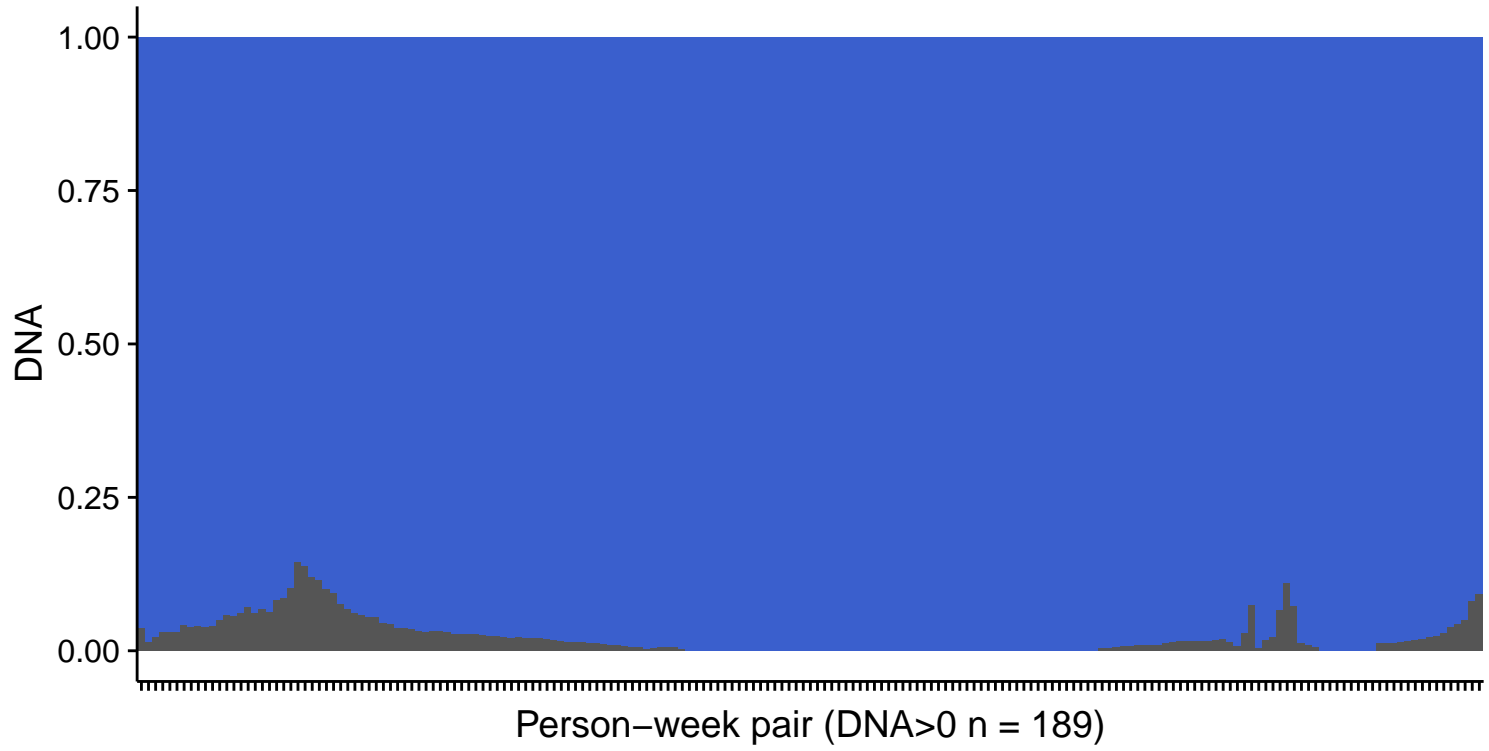



# PWY-6163: chorismate biosynthesis from 3-dehydroquinate

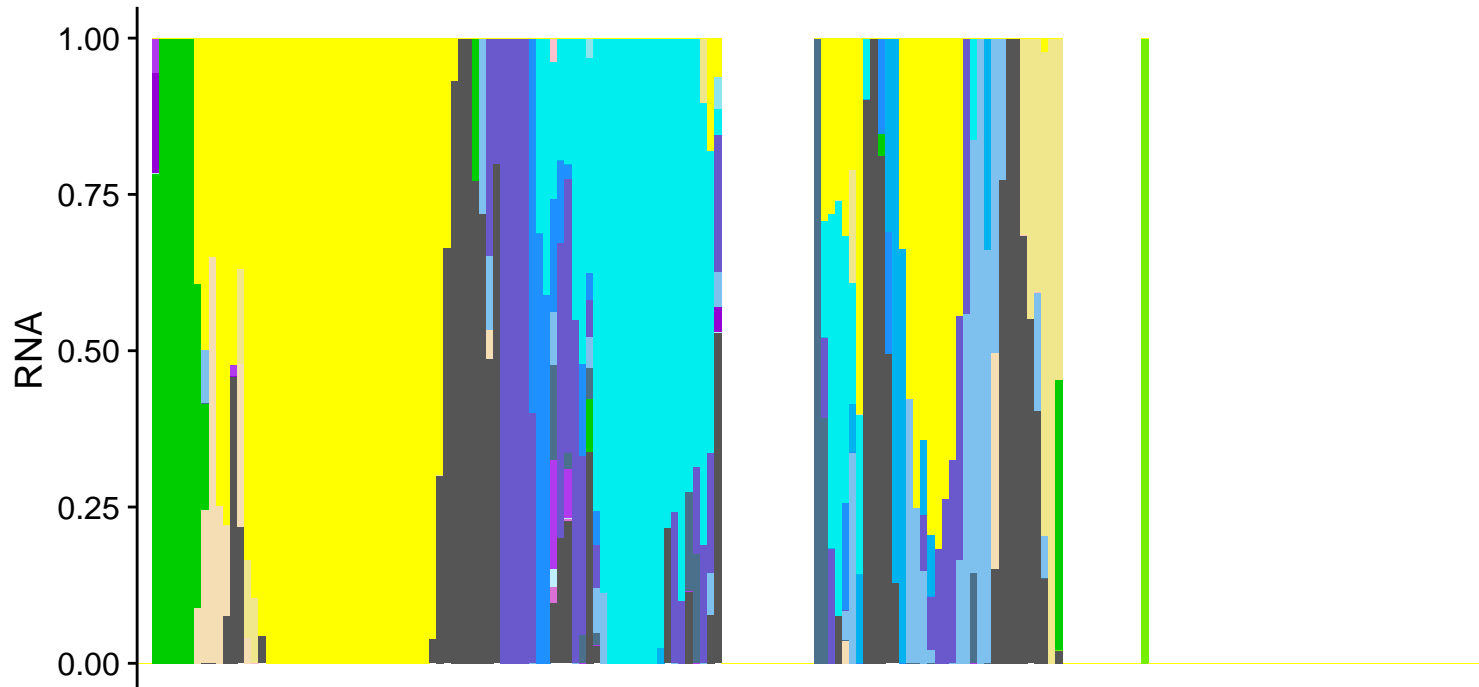

Person-week pair (RNA>0 n = 116)

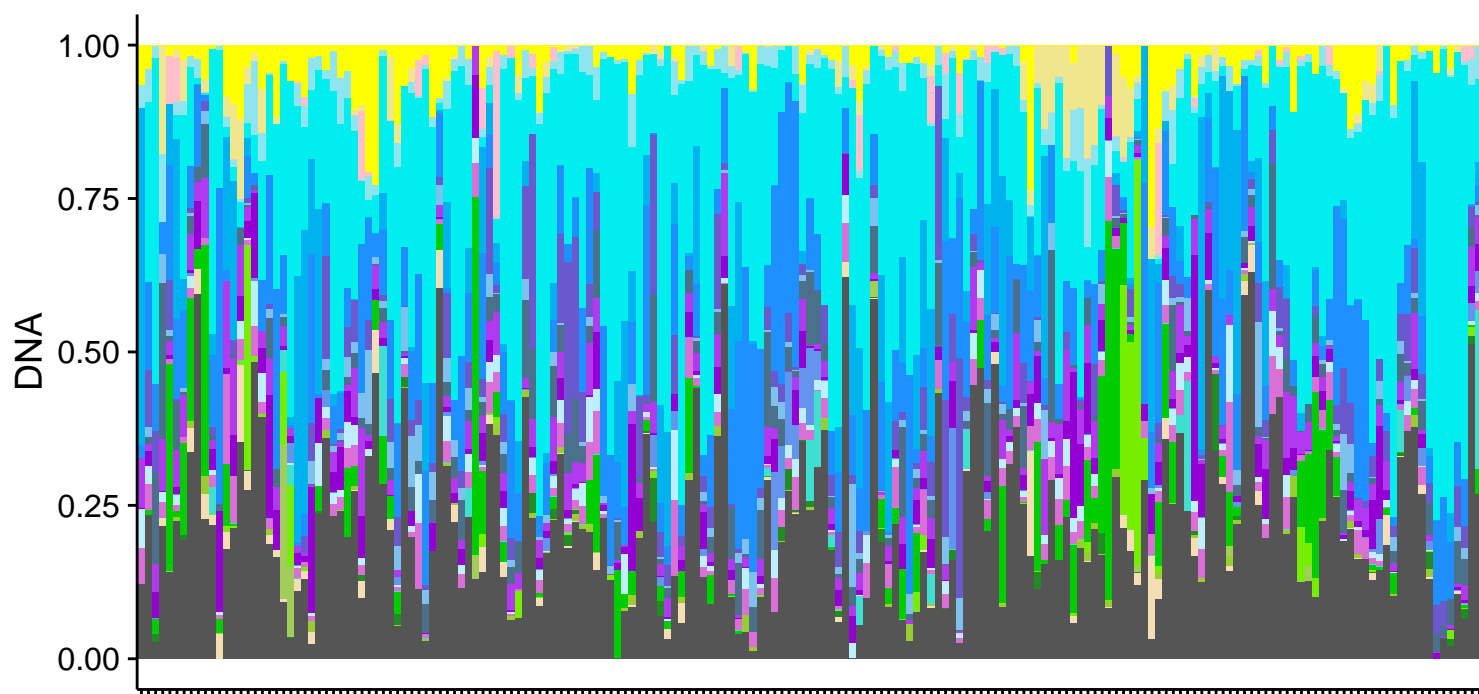

Person-week pair (DNA>0 n = 189)

## Bug

- Alistipes shahii*
- Alistipes finegoldii*
- Bacteroides fragilis*
- Eubacterium hallii*
- Eubacterium rectale*
- Eubacterium siraeum*
- Eubacterium eligens*
- Roseburia intestinalis*
- Roseburia hominis*
- Roseburia inulinivorans*
- Ruminococcus torques*
- Ruminococcus obeum*
- Streptococcus salivarius*
- Anaerostipes hadrus*
- Lachnospiraceae bacterium 5\_1\_63FAA*
- Phascolarctobacterium succinatutens*
- Akkermansia muciniphila*
- Escherichia coli*
- Klebsiella pneumoniae*
- Haemophilus parainfluenzae*
- Bilophila wadsworthia*
- Methanobrevibacter smithii*
- other*

# T-PWY: superpathway of N-acetylglucosamine, N-acetylmannosamine and N-acetylneuraminate degradation

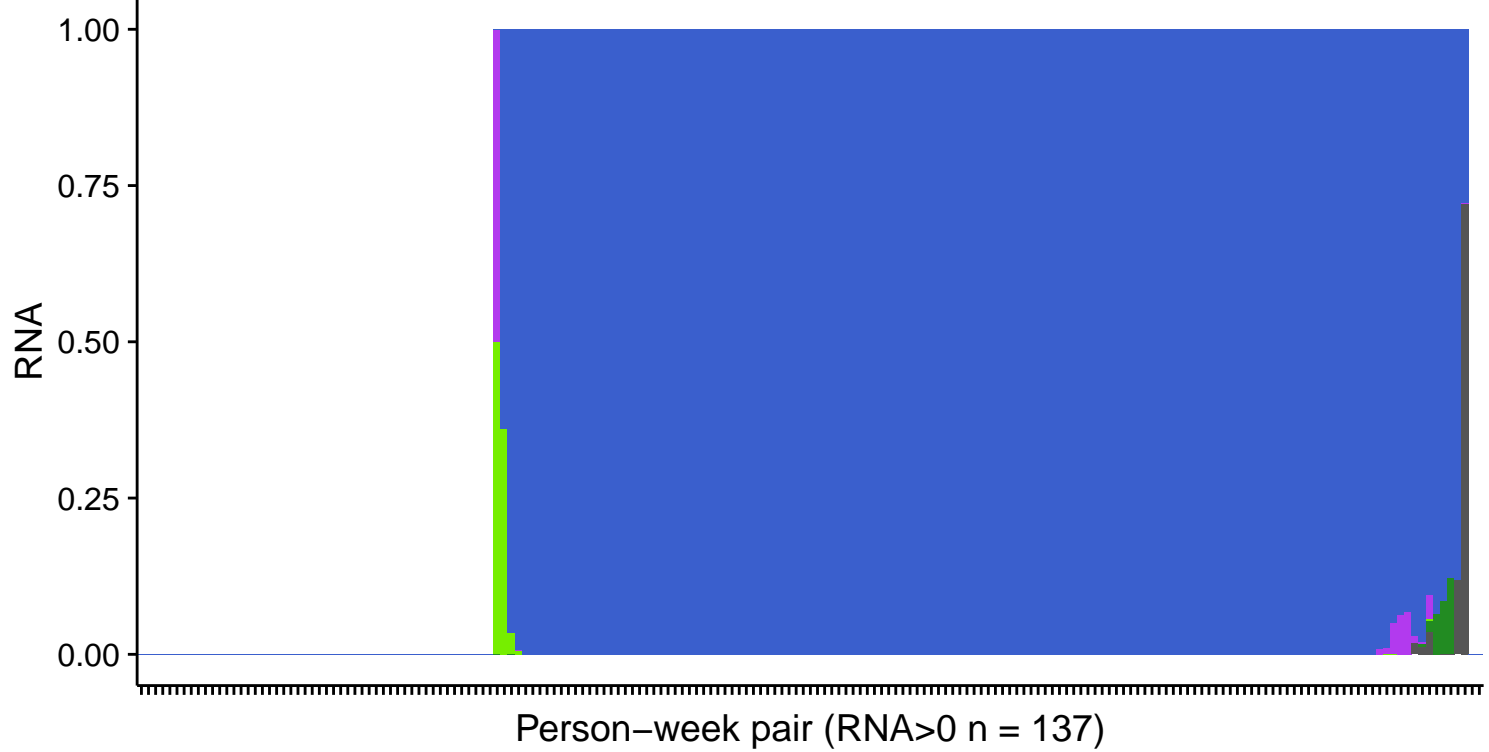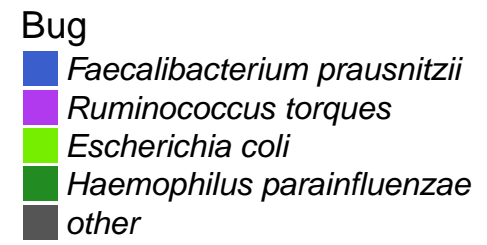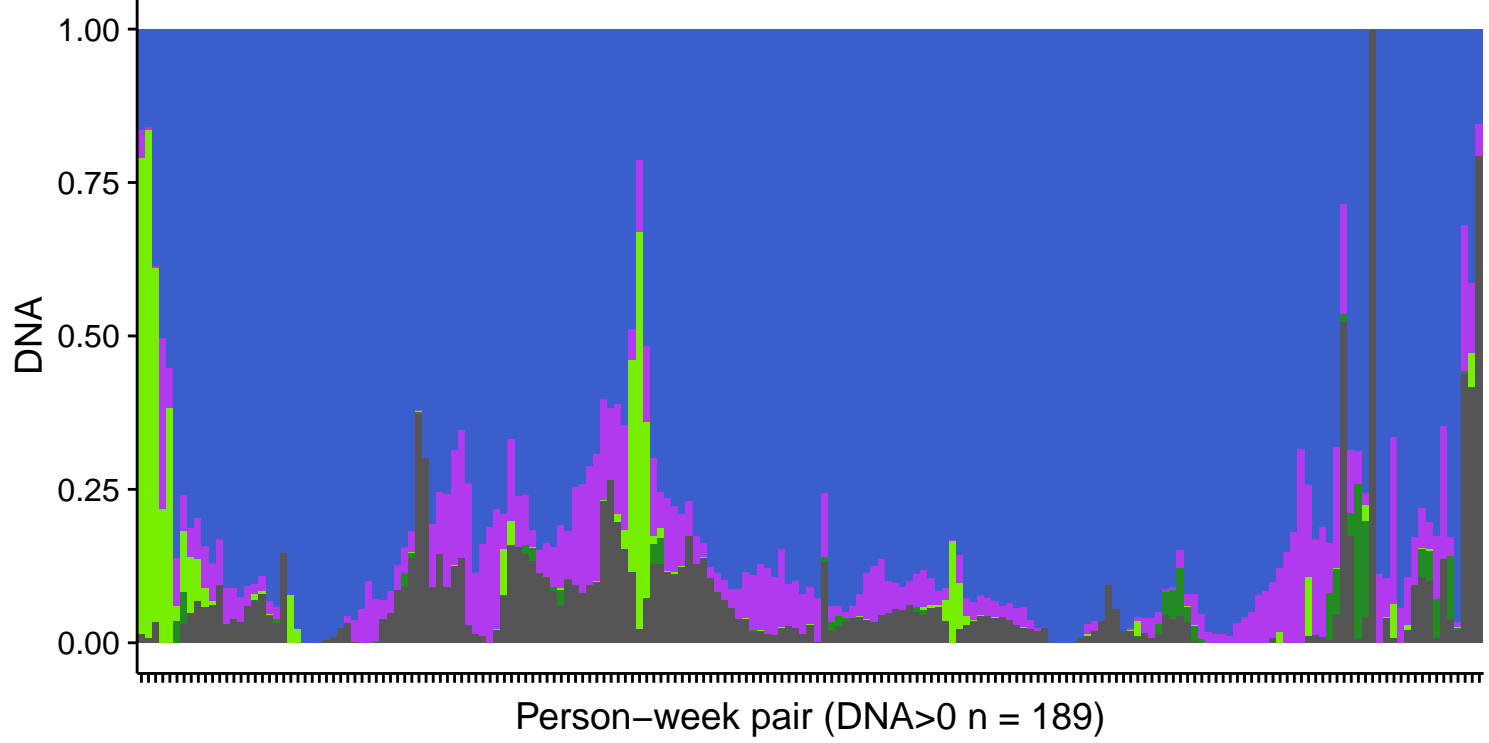

# PWY-6168: flavin biosynthesis III (fungi)

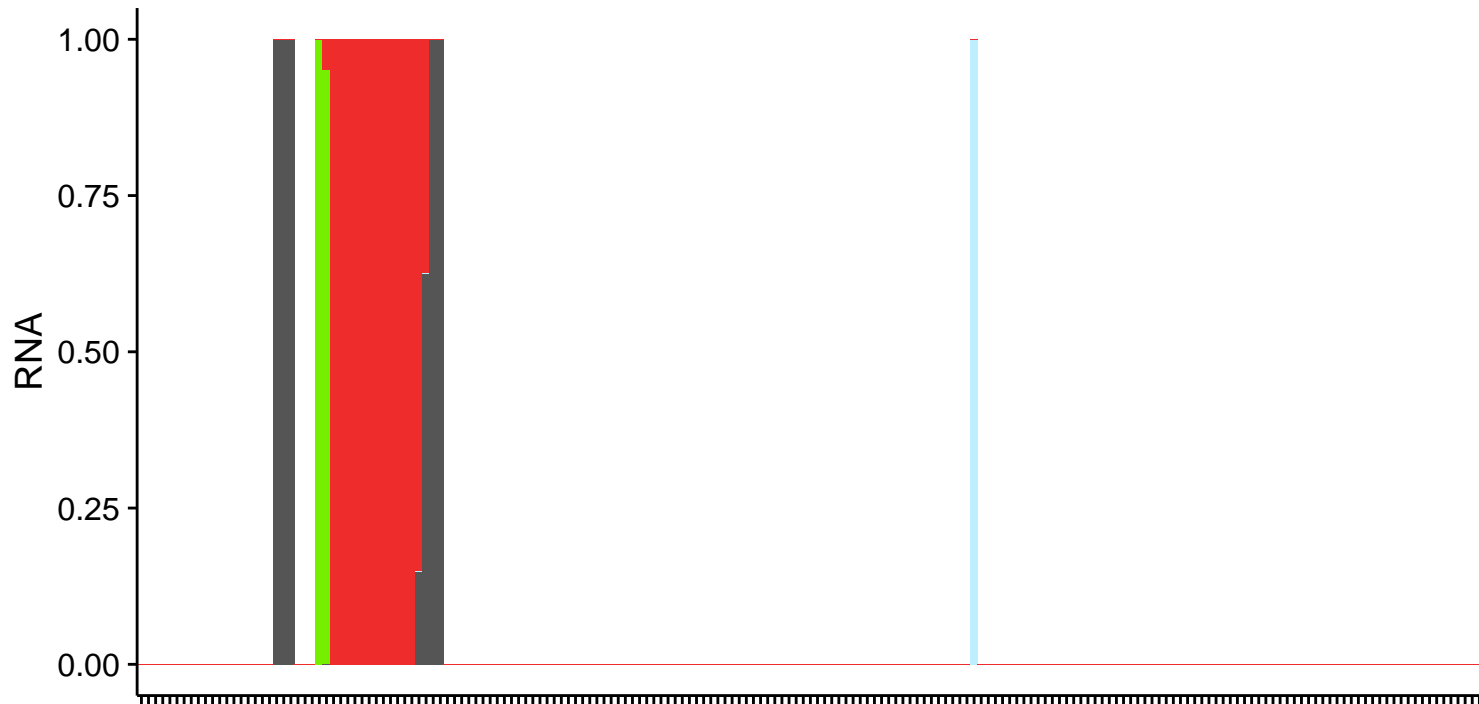

Bug

*Bacteroides thetaiotaomicron*

*Anaerostipes hadrus*

*Lachnospiraceae bacterium 5\_1\_63FAA*

*Escherichia coli*

other

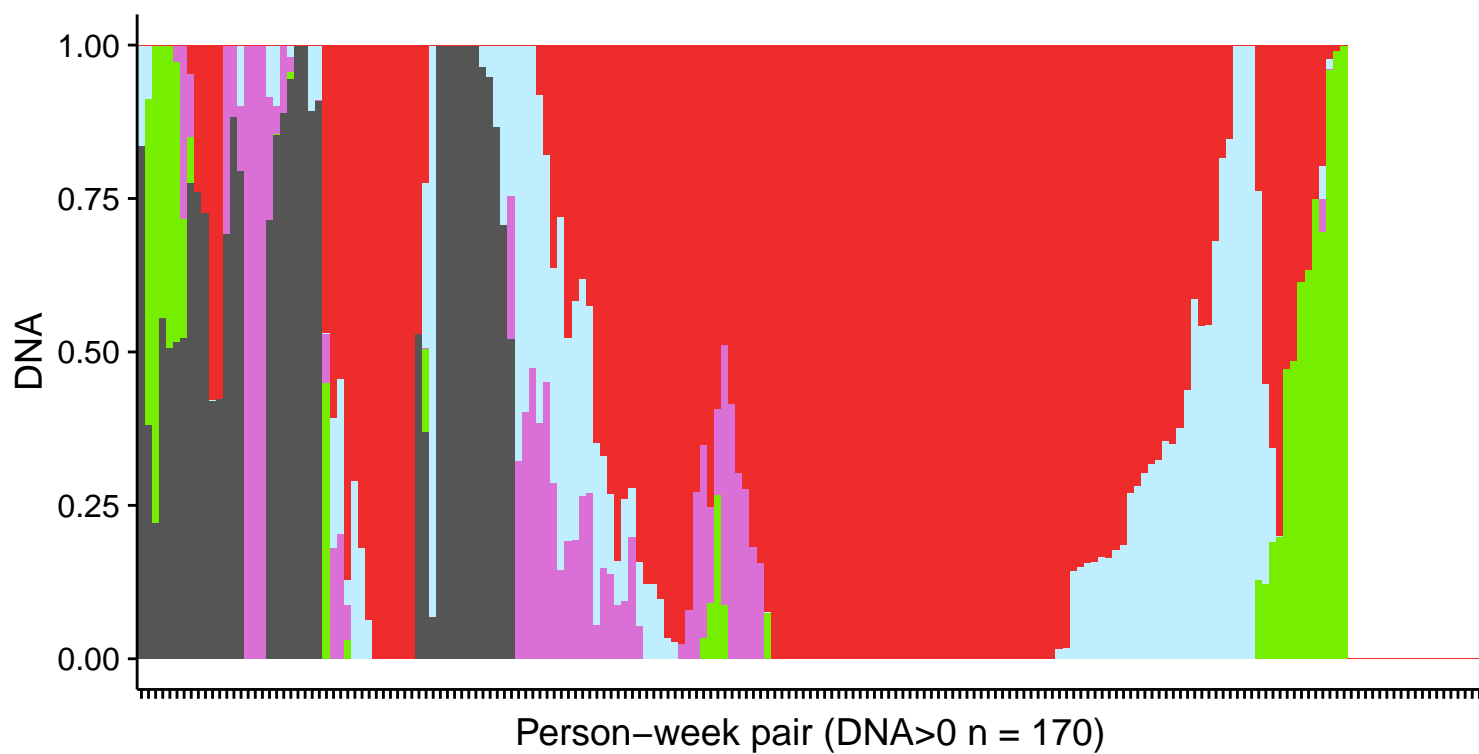

# PWY0-1586: peptidoglycan maturation (meso-diaminopimelate containing)

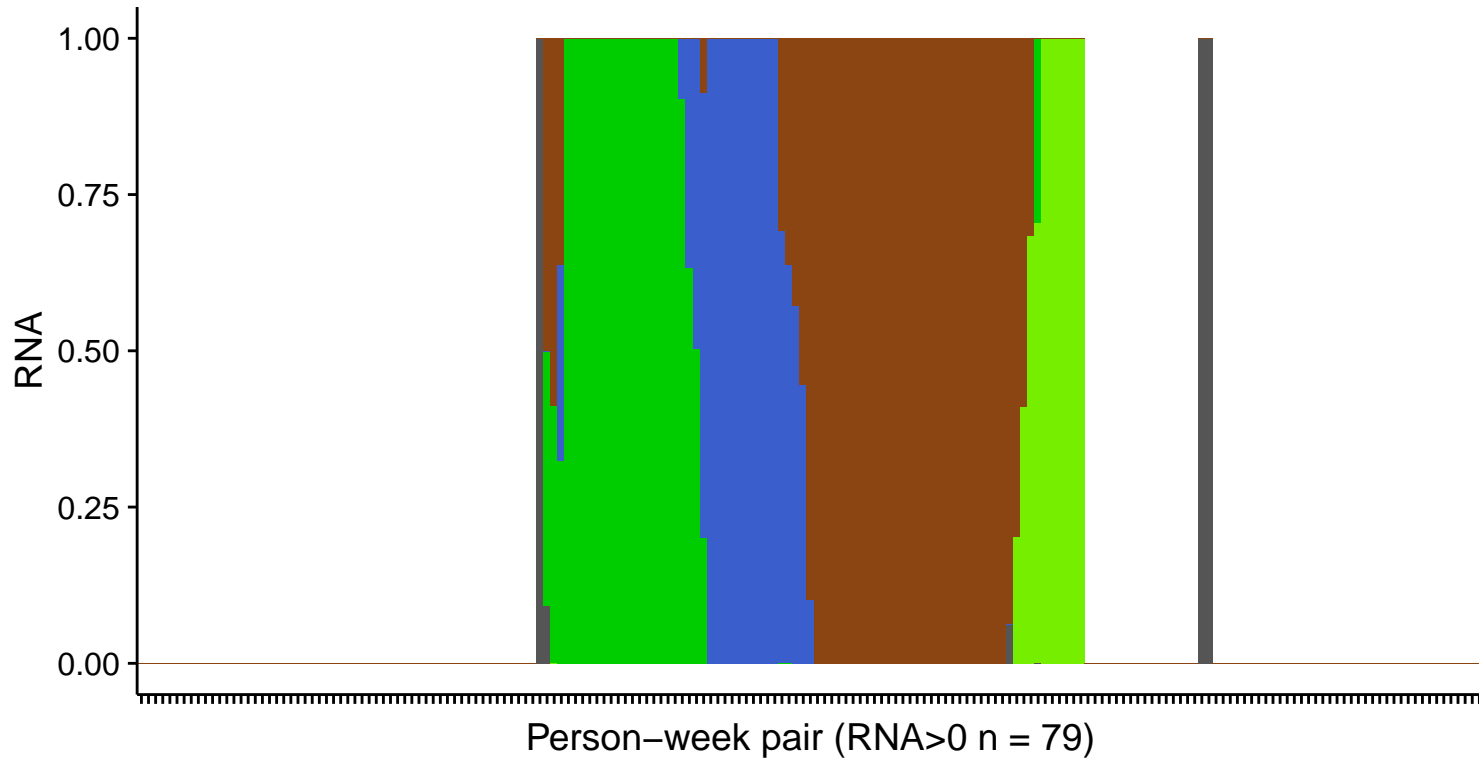

## Bug

- Bacteroides xylanisolvens*
- Odoribacter splanchnicus*
- Faecalibacterium prausnitzii*
- Akkermansia muciniphila*
- Escherichia coli*
- Klebsiella pneumoniae*
- other

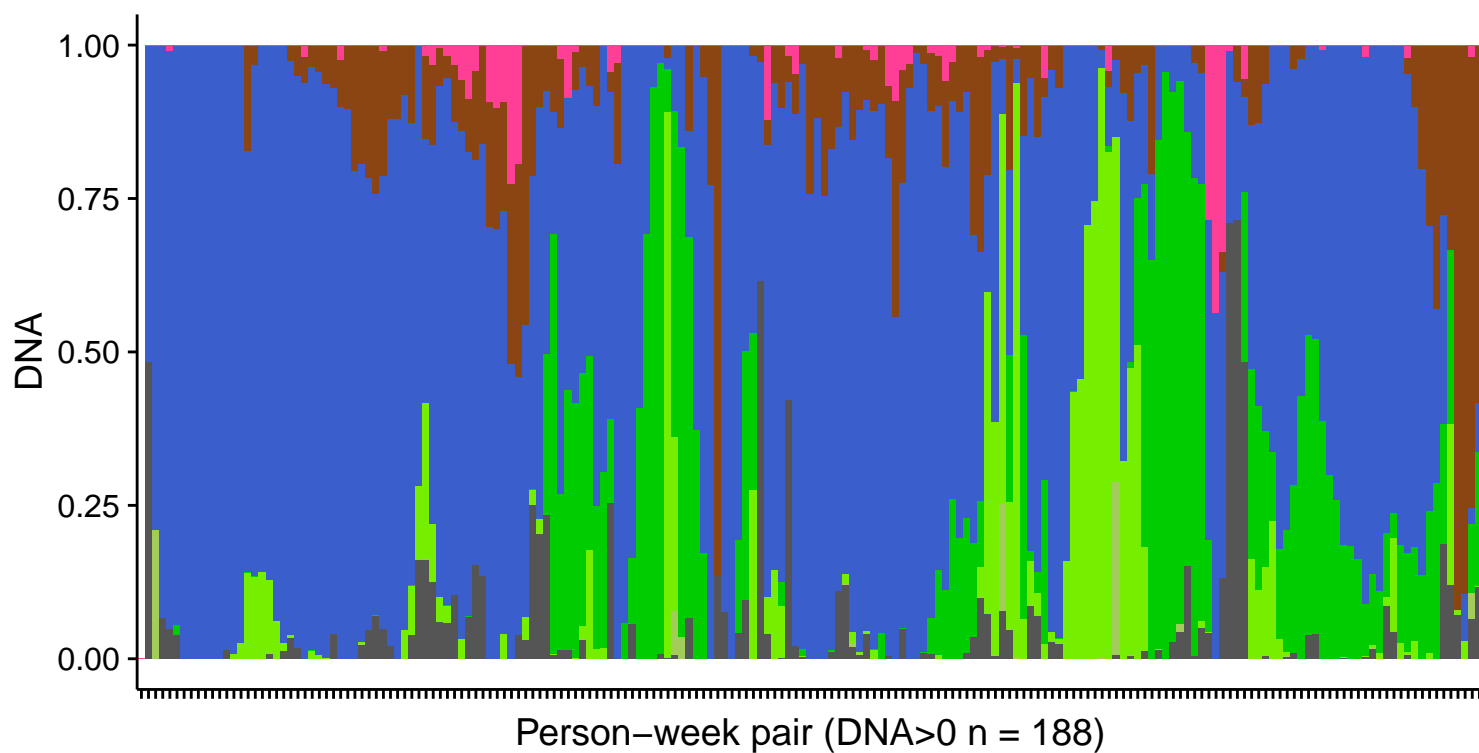

# PWY-5188: tetrapyrrole biosynthesis I (from glutamate)

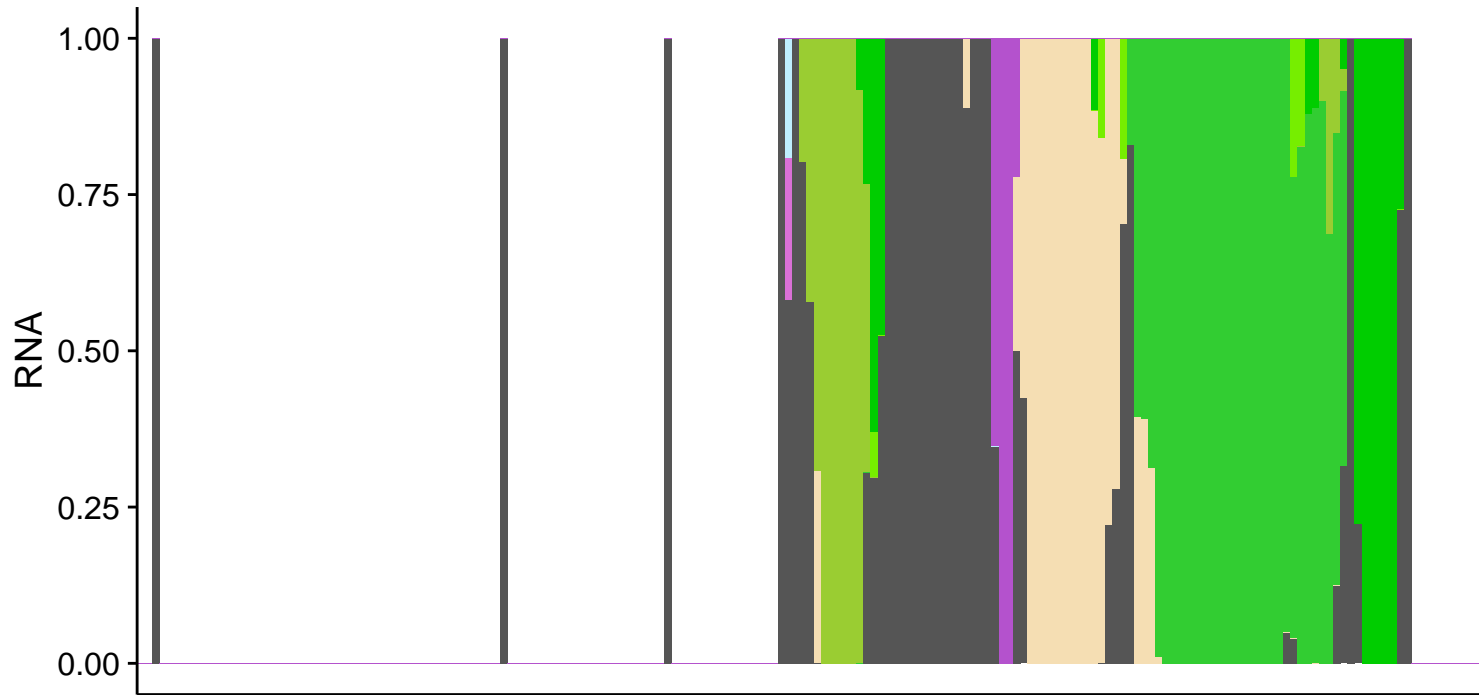

Person-week pair (RNA>0 n = 92)

## Bug

- Ruminococcus obeum*
- Ruminococcus bromii*
- Anaerostipes hadrus*
- Lachnospiraceae bacterium 5\_1\_63FAA*
- Rothia mucilaginosa*
- Akkermansia muciniphila*
- Escherichia coli*
- Klebsiella pneumoniae*
- Haemophilus parainfluenzae*
- Bilophila wadsworthia*
- Sutterella wadsworthensis*
- Methanobrevibacter smithii*
- other

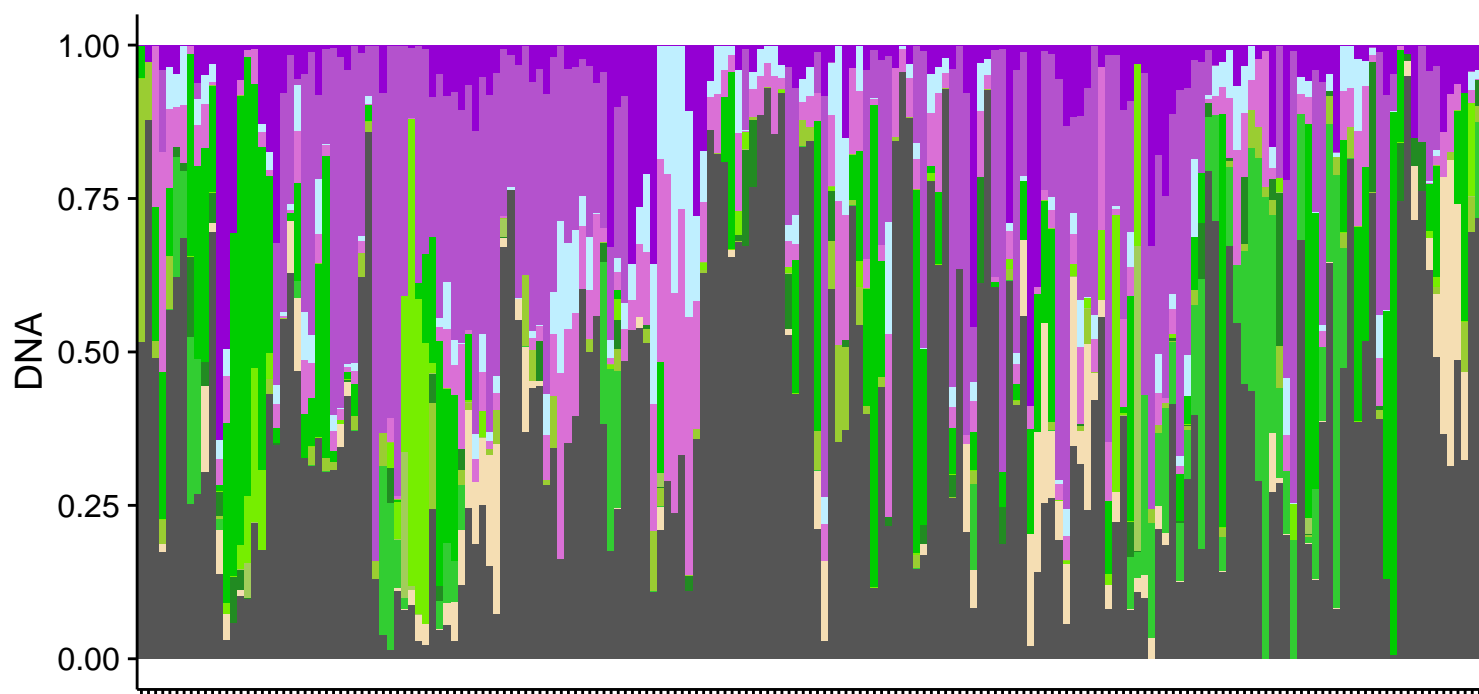

Person-week pair (DNA>0 n = 189)

# PWY-5189: tetrapyrrole biosynthesis II (from glycine)

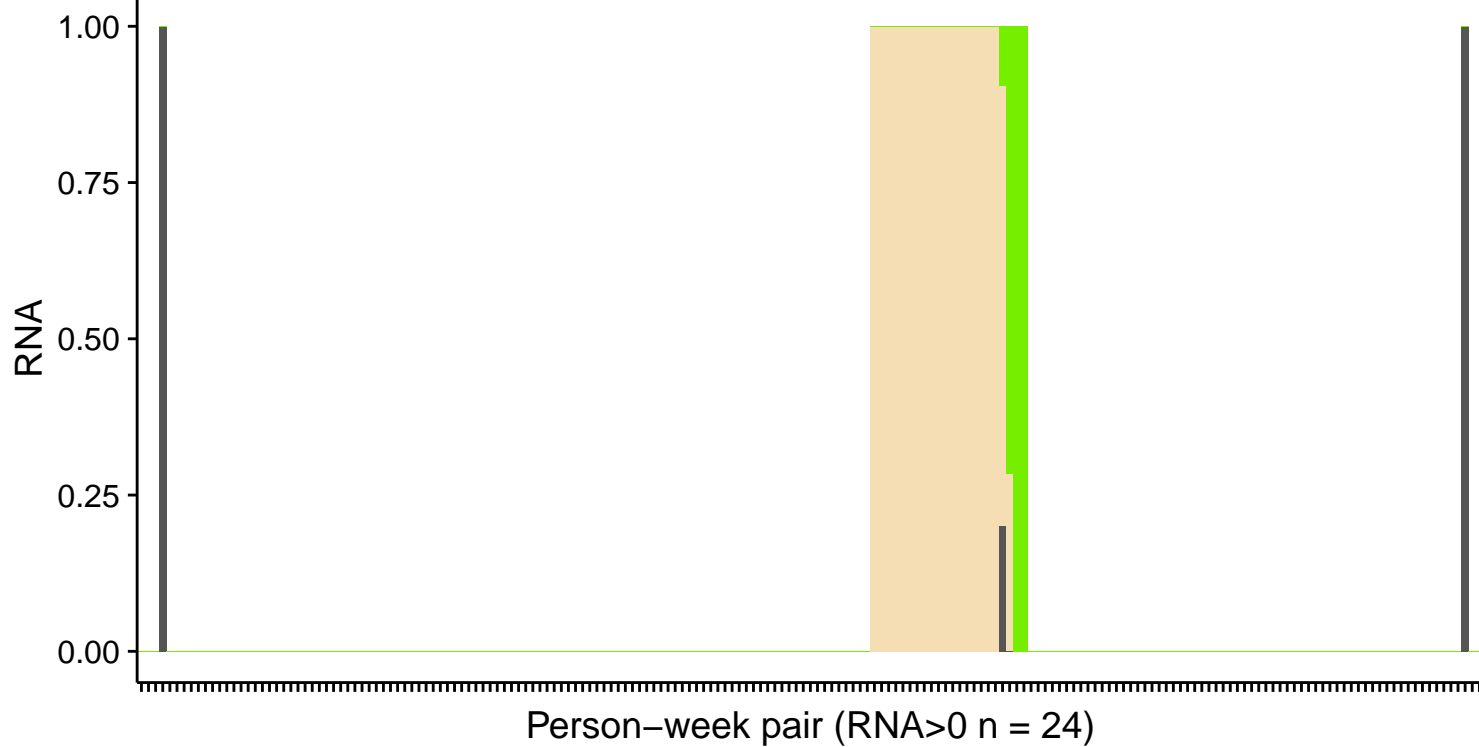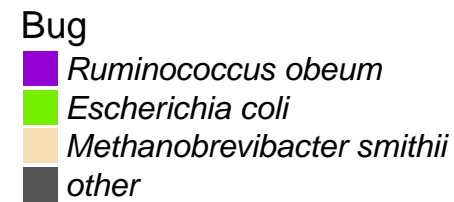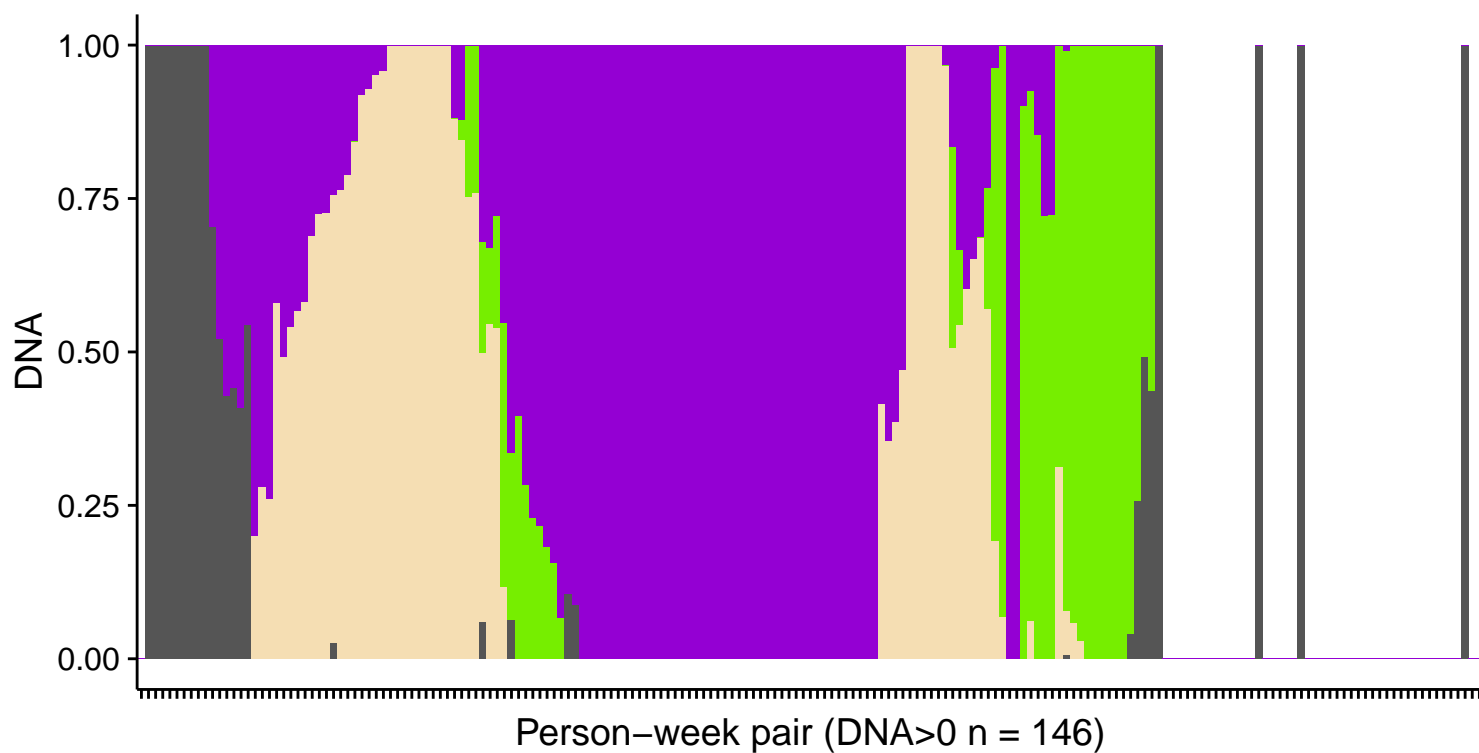

# RHAMCAT-PWY: L-rhamnose degradation I

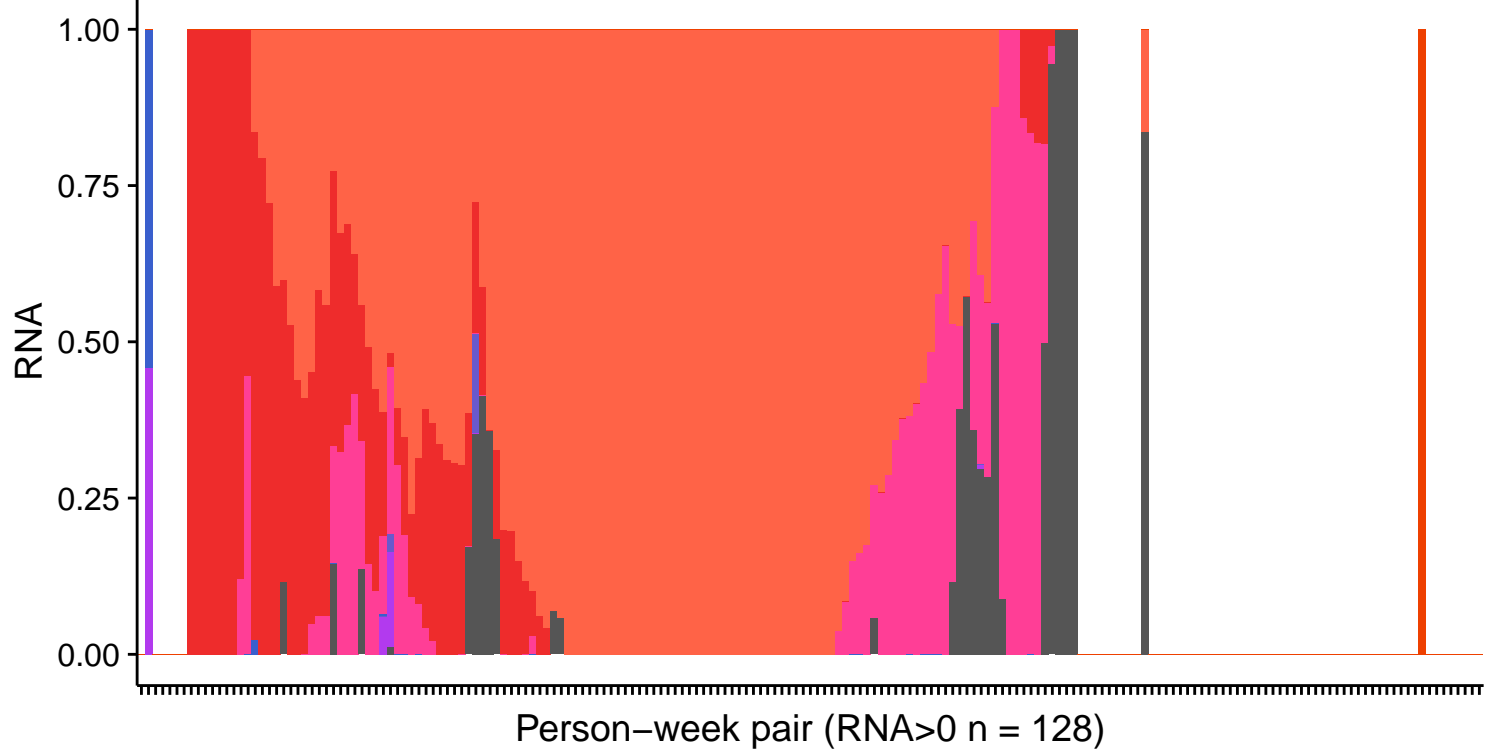

- Bug
- *Bacteroides caccae*
  - *Bacteroides ovatus*
  - *Bacteroides thetaiotaomicron*
  - *Bacteroides xylanisolvens*
  - *Faecalibacterium prausnitzii*
  - *Roseburia intestinalis*
  - *Ruminococcus torques*
  - *Escherichia coli*
  - *Klebsiella pneumoniae*
  - *other*

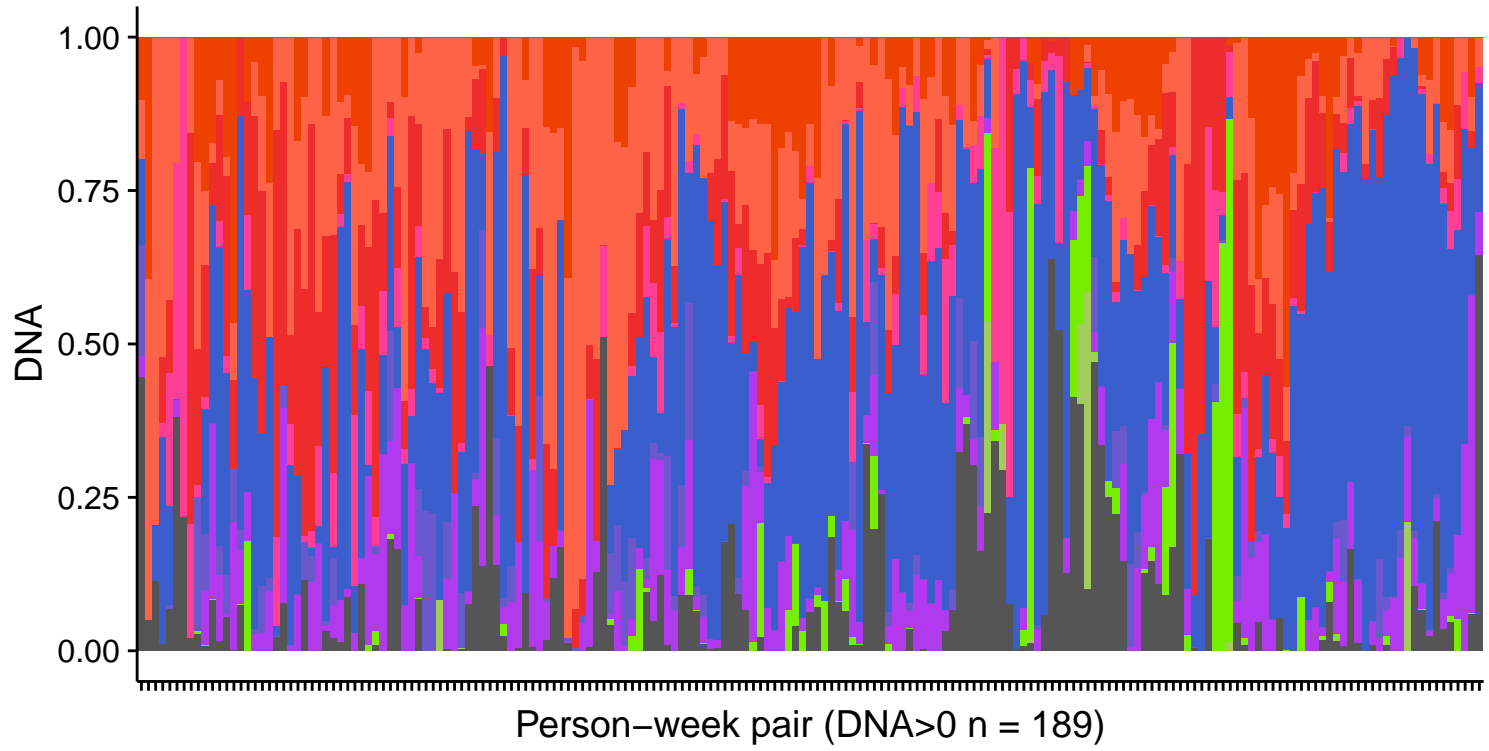

# ARO-PWY: chorismate biosynthesis I

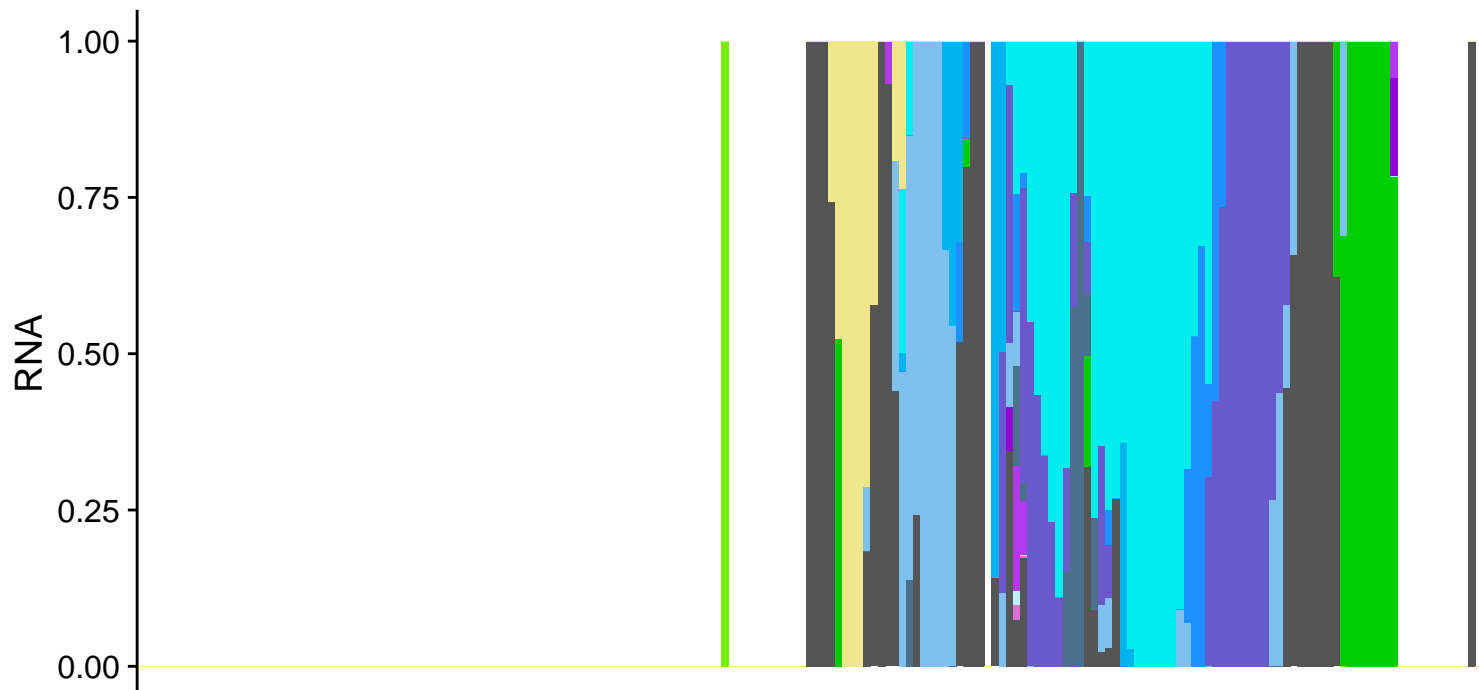

Person-week pair (RNA>0 n = 84)

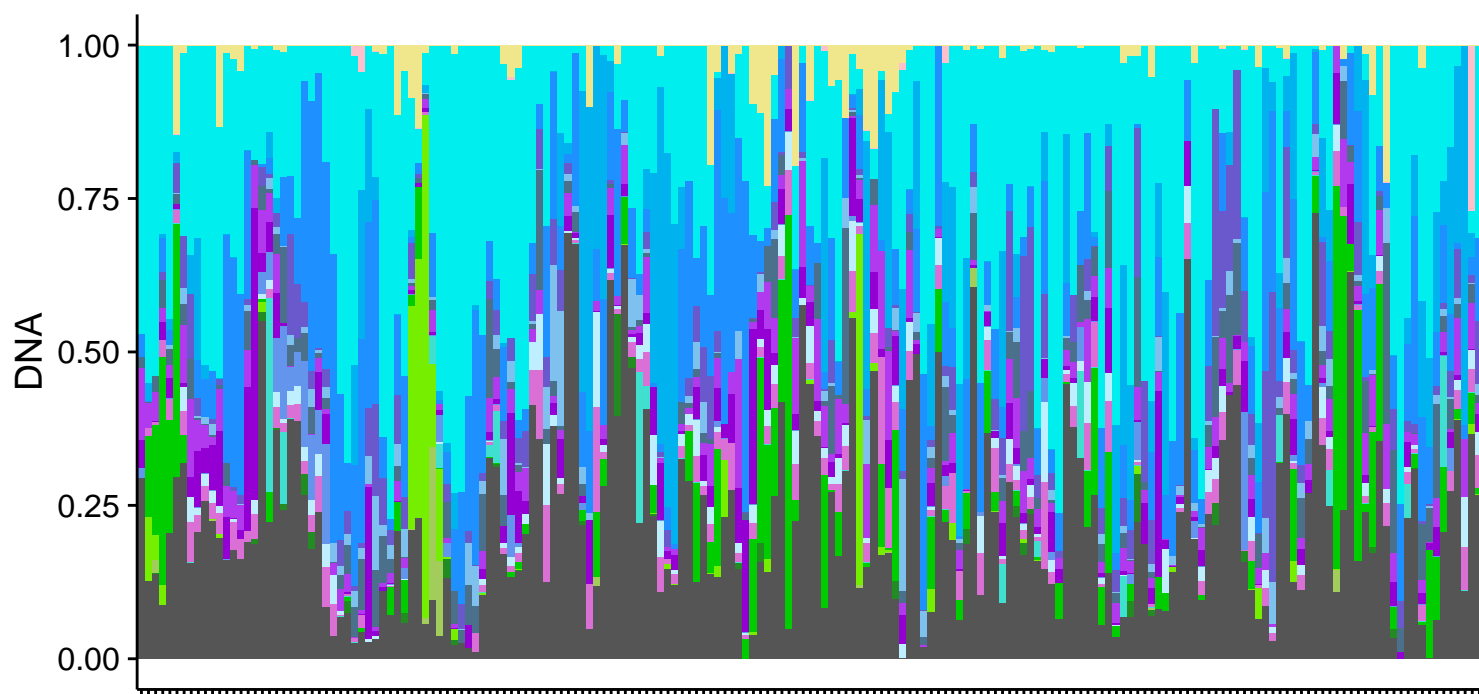

Person-week pair (DNA>0 n = 189)

## Bug

- Alistipes finegoldii*
- Bacteroides fragilis*
- Eubacterium rectale*
- Eubacterium siraeum*
- Eubacterium eligens*
- Roseburia intestinalis*
- Roseburia hominis*
- Roseburia inulinivorans*
- Ruminococcus torques*
- Ruminococcus obeum*
- Streptococcus salivarius*
- Anaerostipes hadrus*
- Lachnospiraceae bacterium 5\_1\_63FAA*
- Phascolarctobacterium succinatutens*
- Akkermansia muciniphila*
- Escherichia coli*
- Klebsiella pneumoniae*
- Haemophilus parainfluenzae*
- other*



# ARGSYN-PWY: L-arginine biosynthesis I (via L-ornithine)

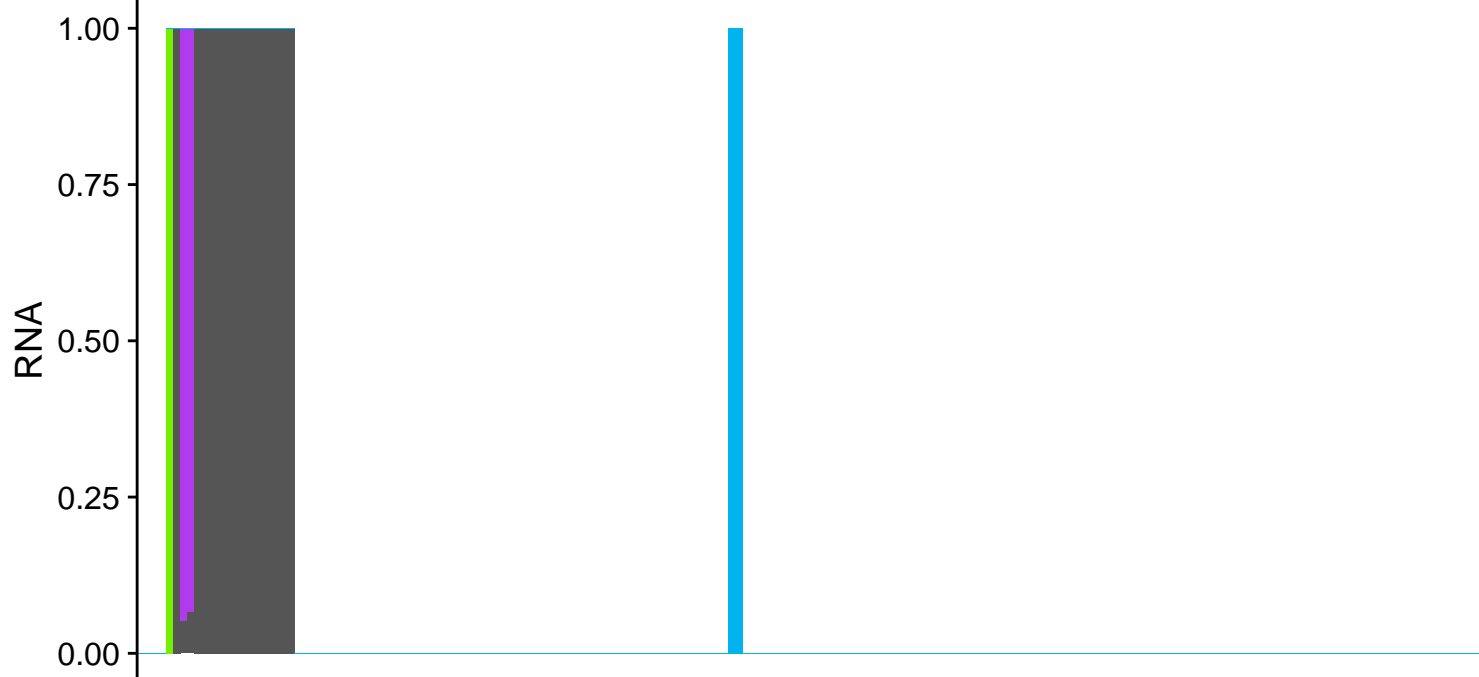

Person-week pair (RNA>0 n = 20)

Bug

- Eubacterium siraeum*
- Ruminococcus torques*
- Escherichia coli*
- Klebsiella pneumoniae*
- other

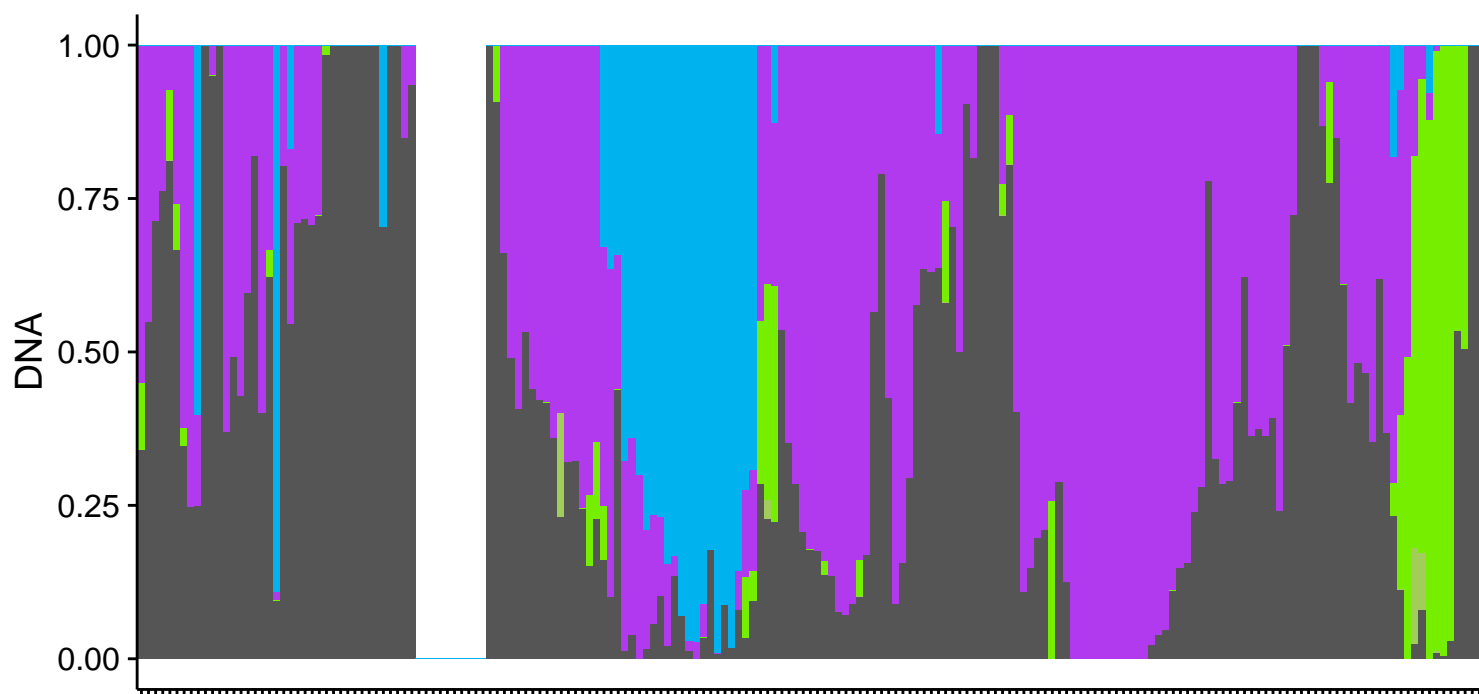

Person-week pair (DNA>0 n = 179)

# PWY-6305: putrescine biosynthesis IV

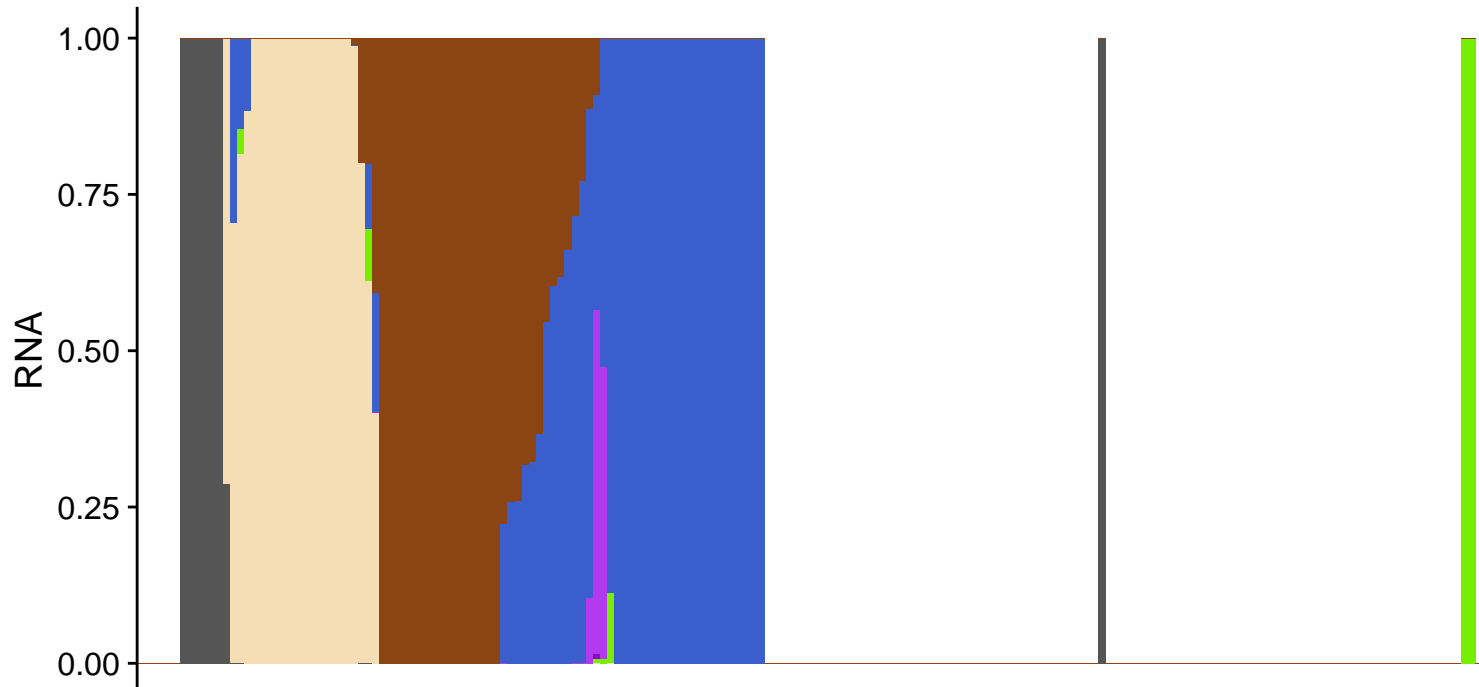

Person-week pair (RNA>0 n = 85)

## Bug

- Odoribacter splanchnicus*
- Faecalibacterium prausnitzii*
- Ruminococcus torques*
- Ruminococcus obeum*
- Escherichia coli*
- Klebsiella pneumoniae*
- Methanobrevibacter smithii*
- other

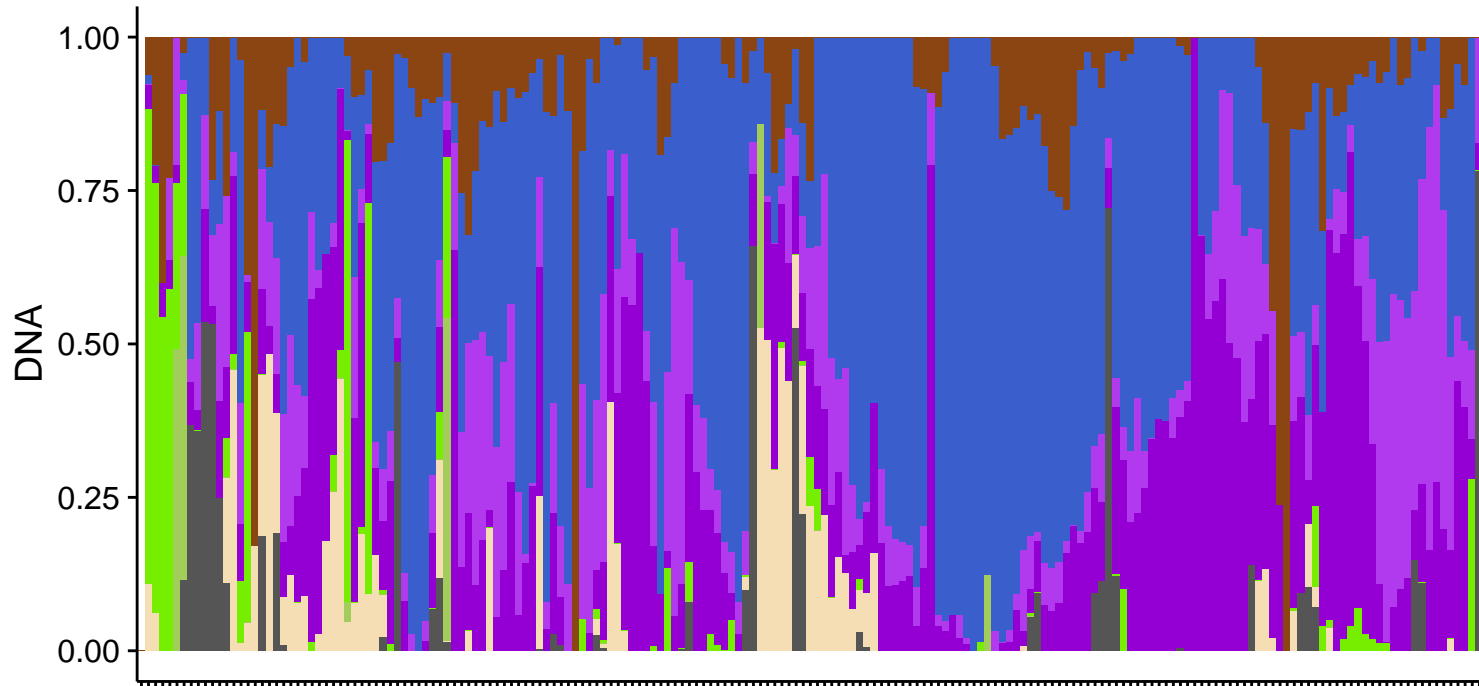

Person-week pair (DNA>0 n = 188)

# ARGSYNBSUB-PWY: L-arginine biosynthesis II (acetyl cycle)

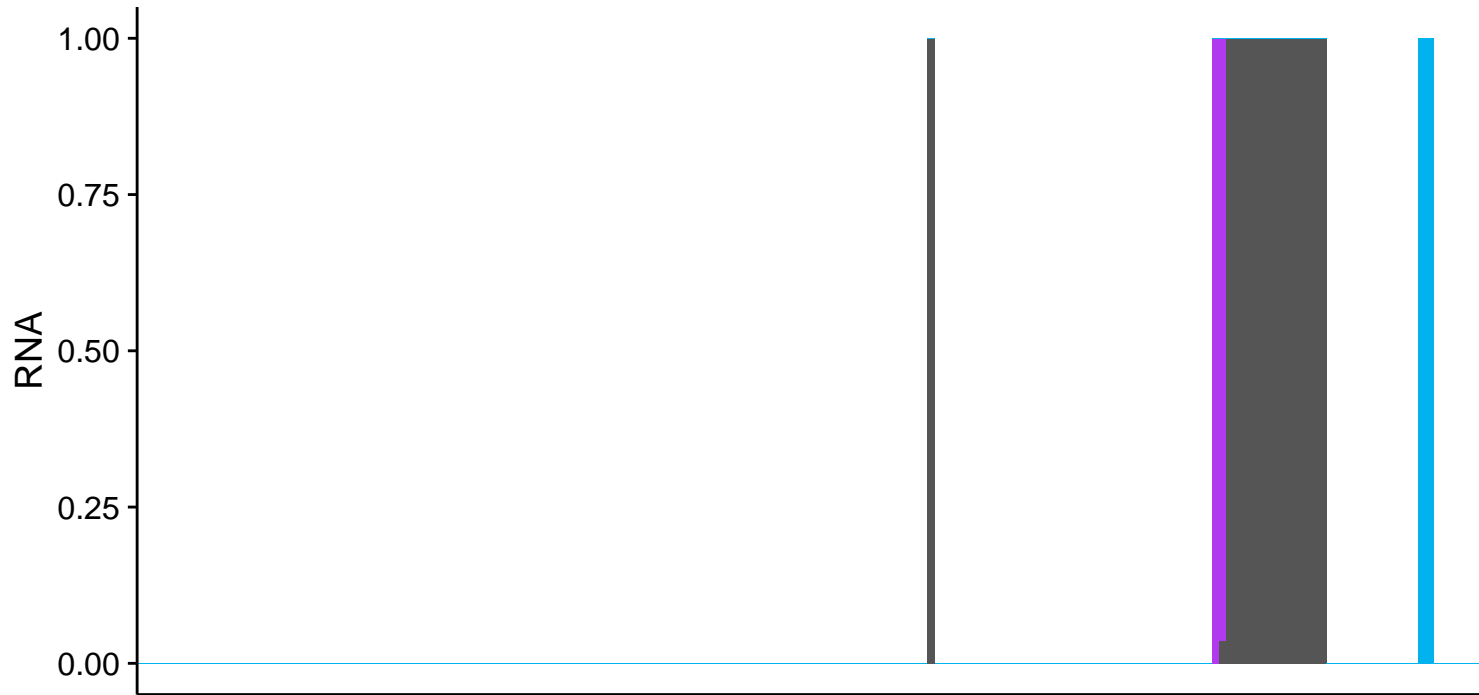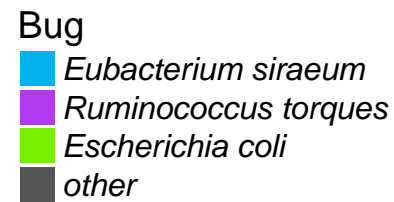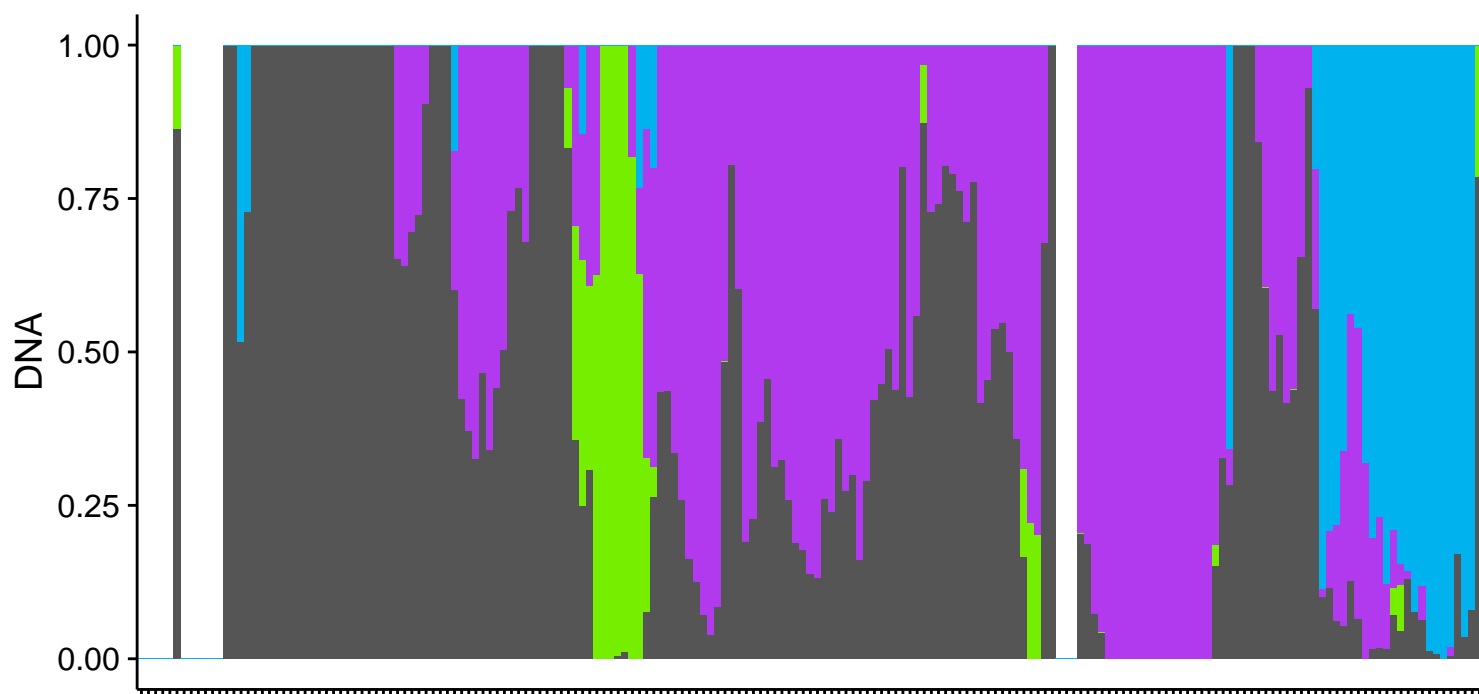

# PWY-7400: L-arginine biosynthesis IV (archaeobacteria)

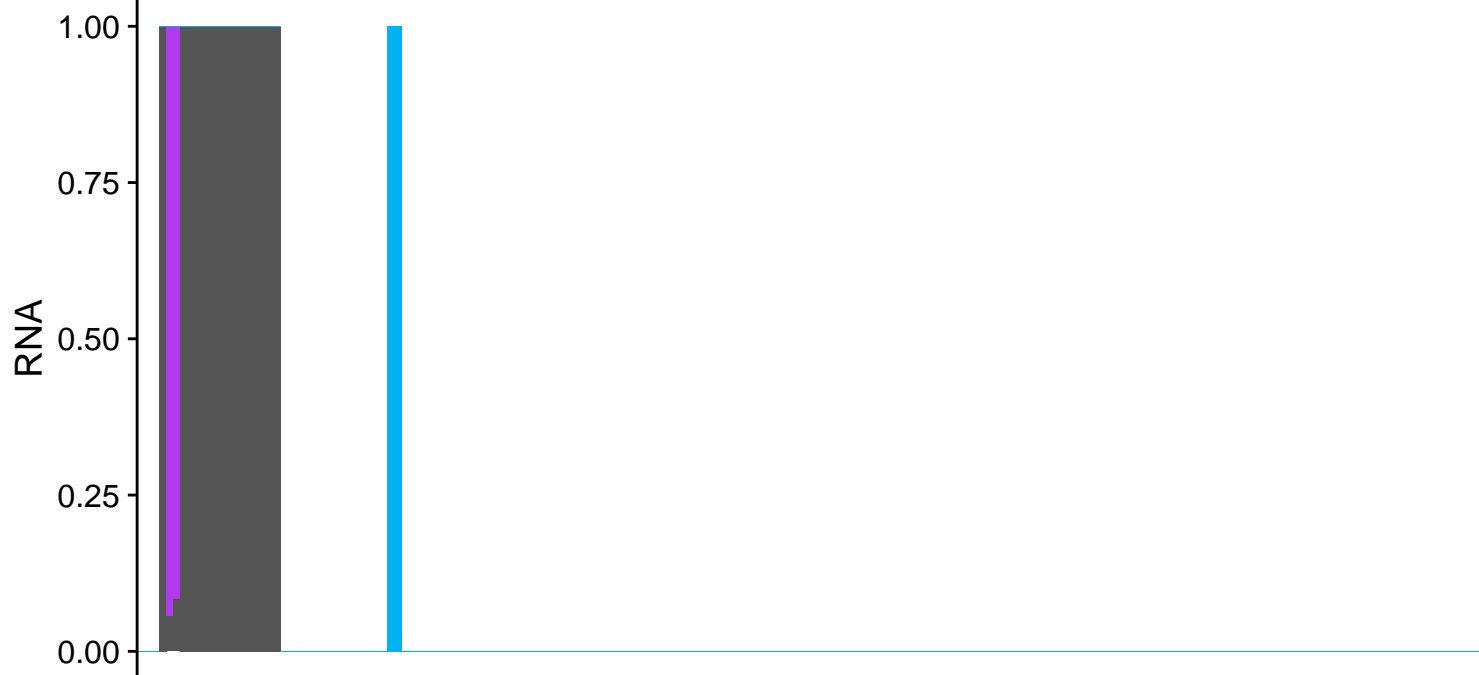

Bug

- Eubacterium siraeum*
- Ruminococcus torques*
- Escherichia coli*
- other

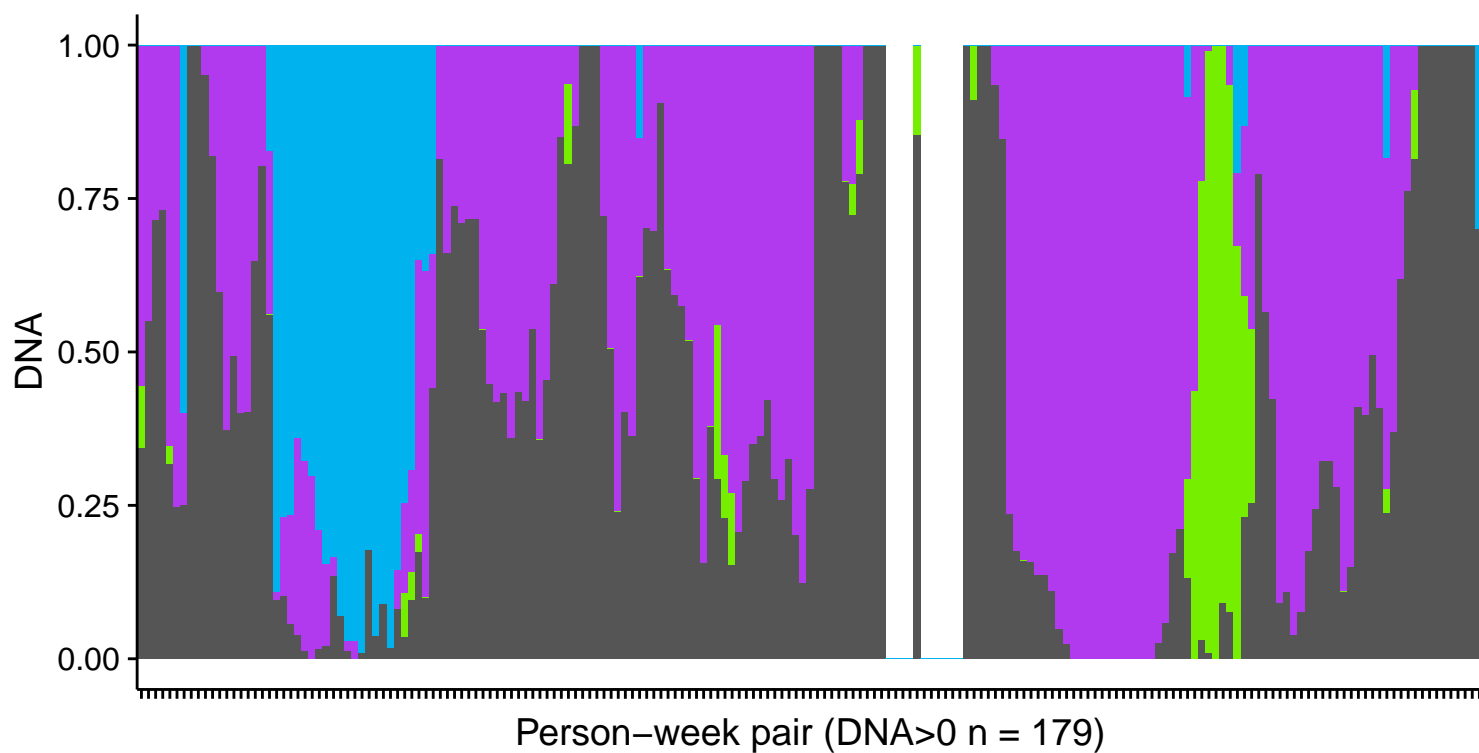

# GLUTORN-PWY: L-ornithine biosynthesis

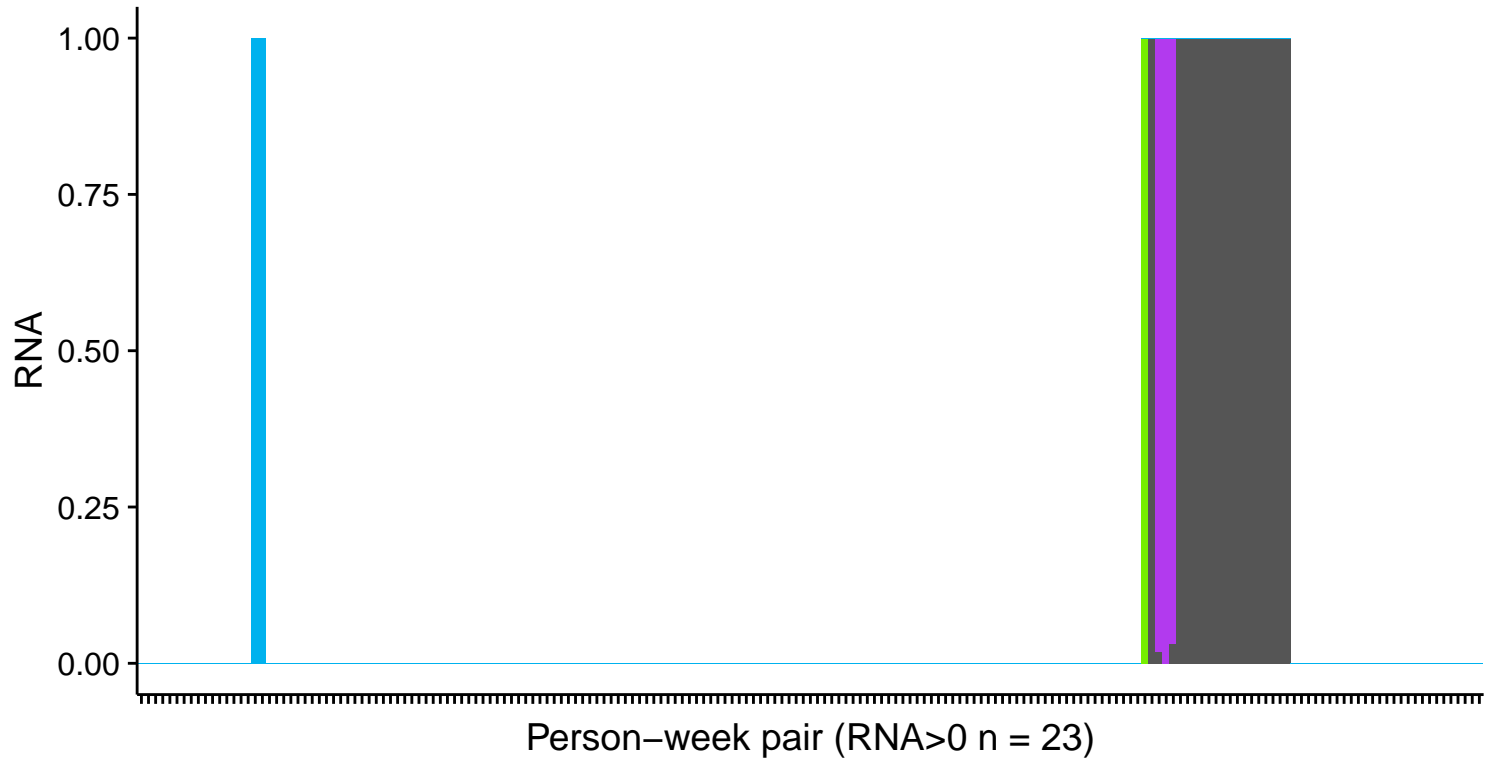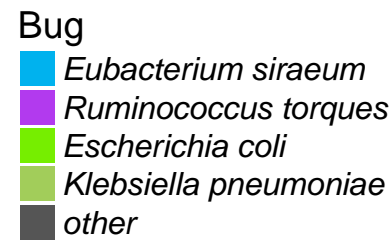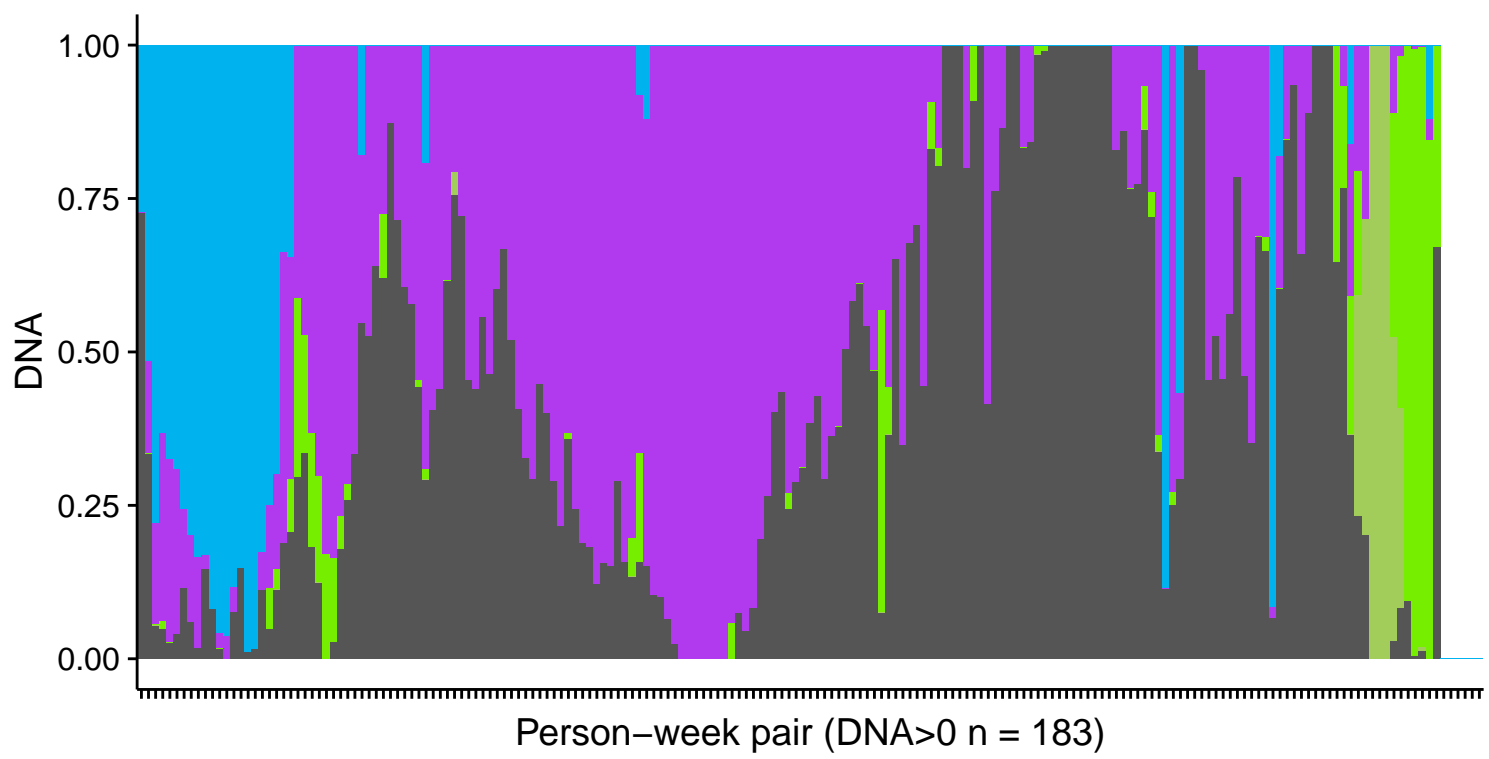

# COMPLETE-ARO-PWY: superpathway of aromatic amino acid biosynthesis

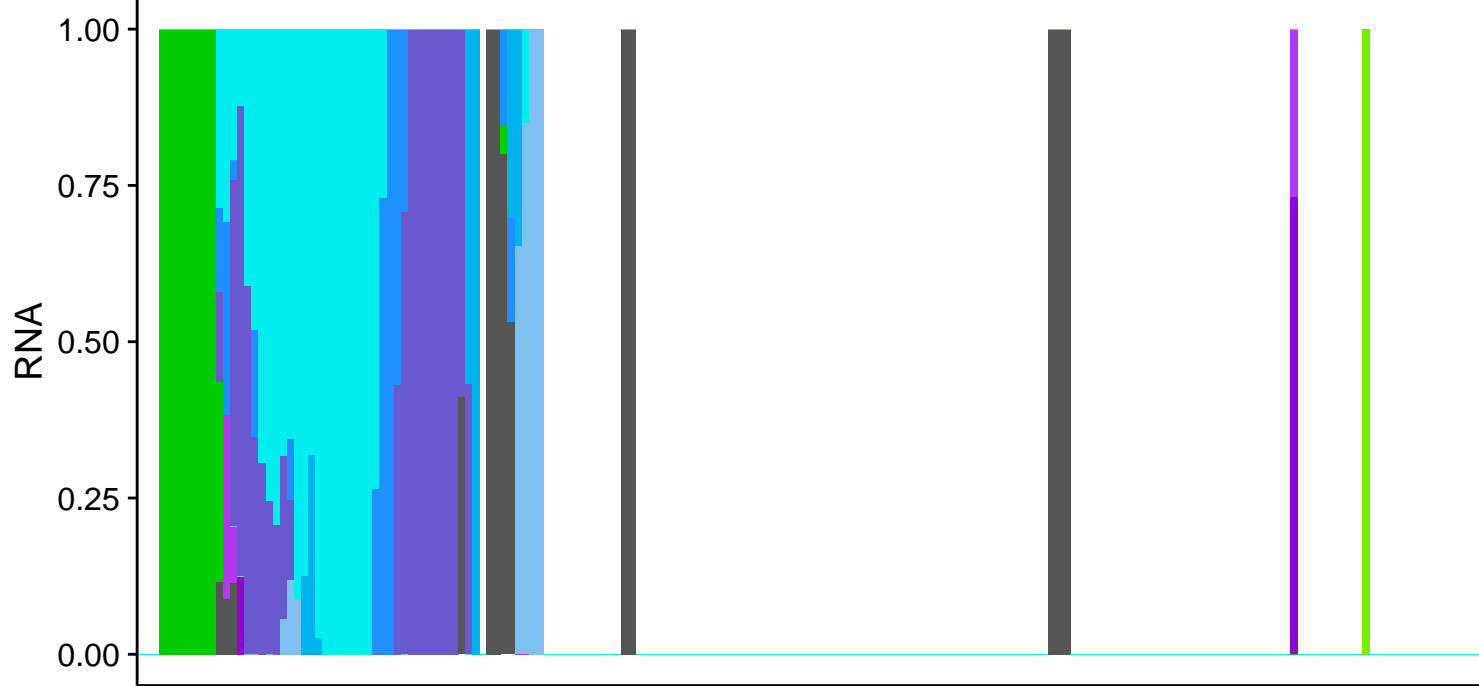

Person-week pair (RNA>0 n = 60)

## Bug

- *Bacteroides fragilis*
- *Eubacterium rectale*
- *Eubacterium siraeum*
- *Eubacterium eligens*
- *Roseburia intestinalis*
- *Roseburia hominis*
- *Ruminococcus torques*
- *Ruminococcus obeum*
- *Streptococcus salivarius*
- *Anaerostipes hadrus*
- *Lachnospiraceae bacterium 5 1 63FAA*
- *Phascolarctobacterium succinatutens*
- *Akkermansia muciniphila*
- *Escherichia coli*
- *Klebsiella pneumoniae*
- *Haemophilus parainfluenzae*
- *other*

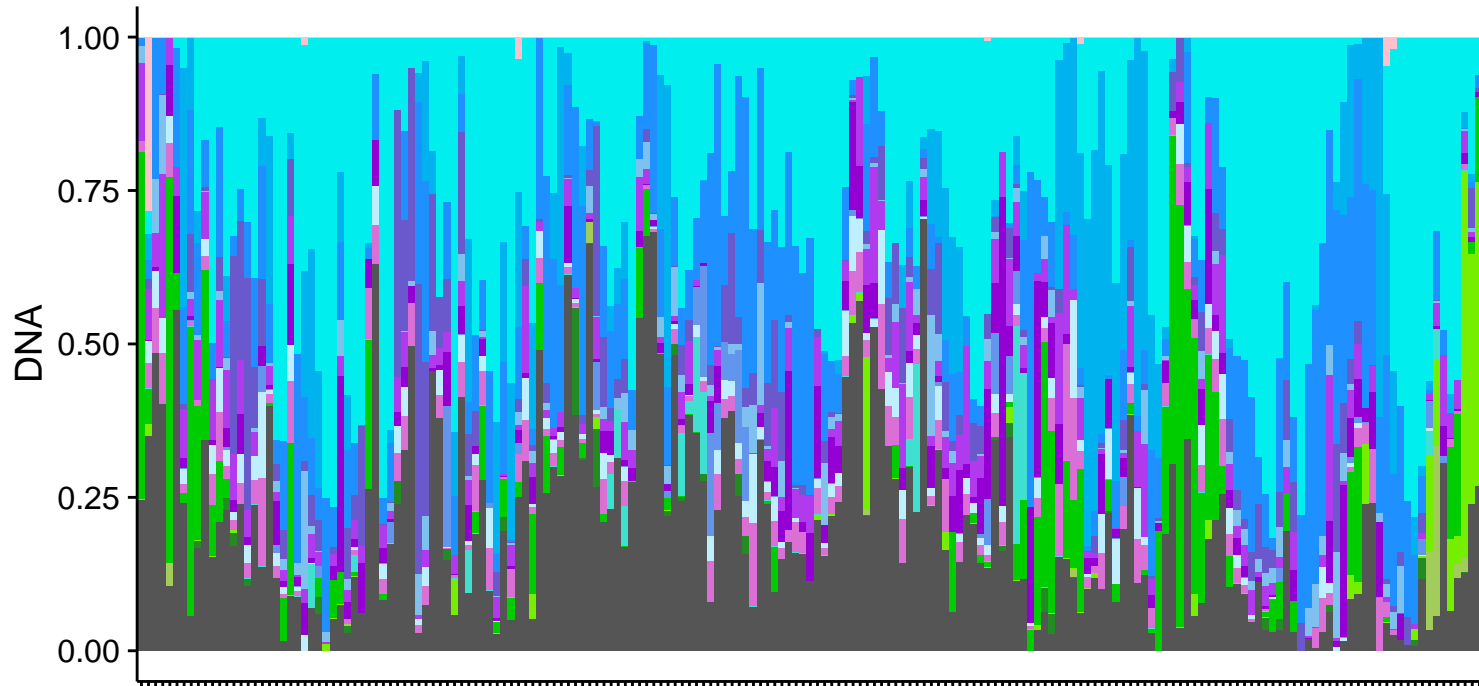

Person-week pair (DNA>0 n = 189)

# PWY-7234: inosine-5'-phosphate biosynthesis III

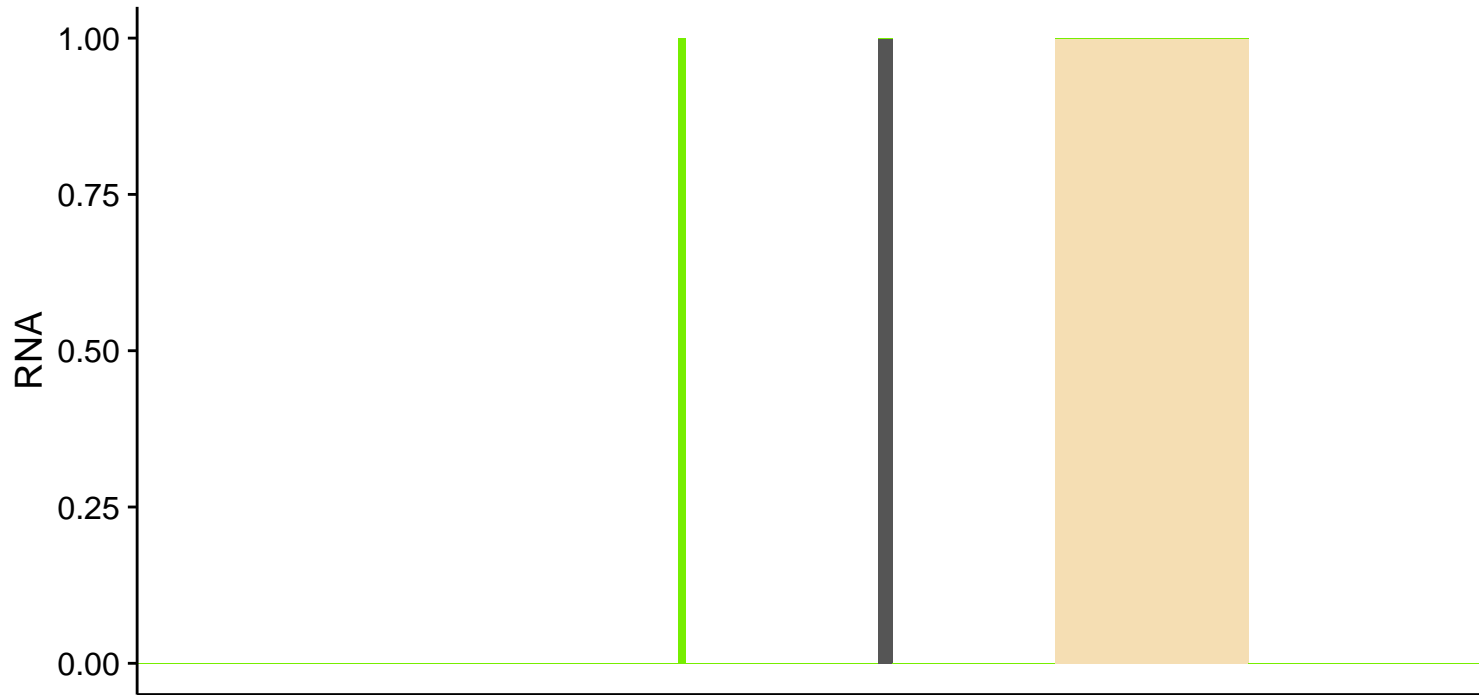

Person-week pair (RNA>0 n = 30)

Bug

- Escherichia coli*
- Haemophilus parainfluenzae*
- Methanobrevibacter smithii*
- other

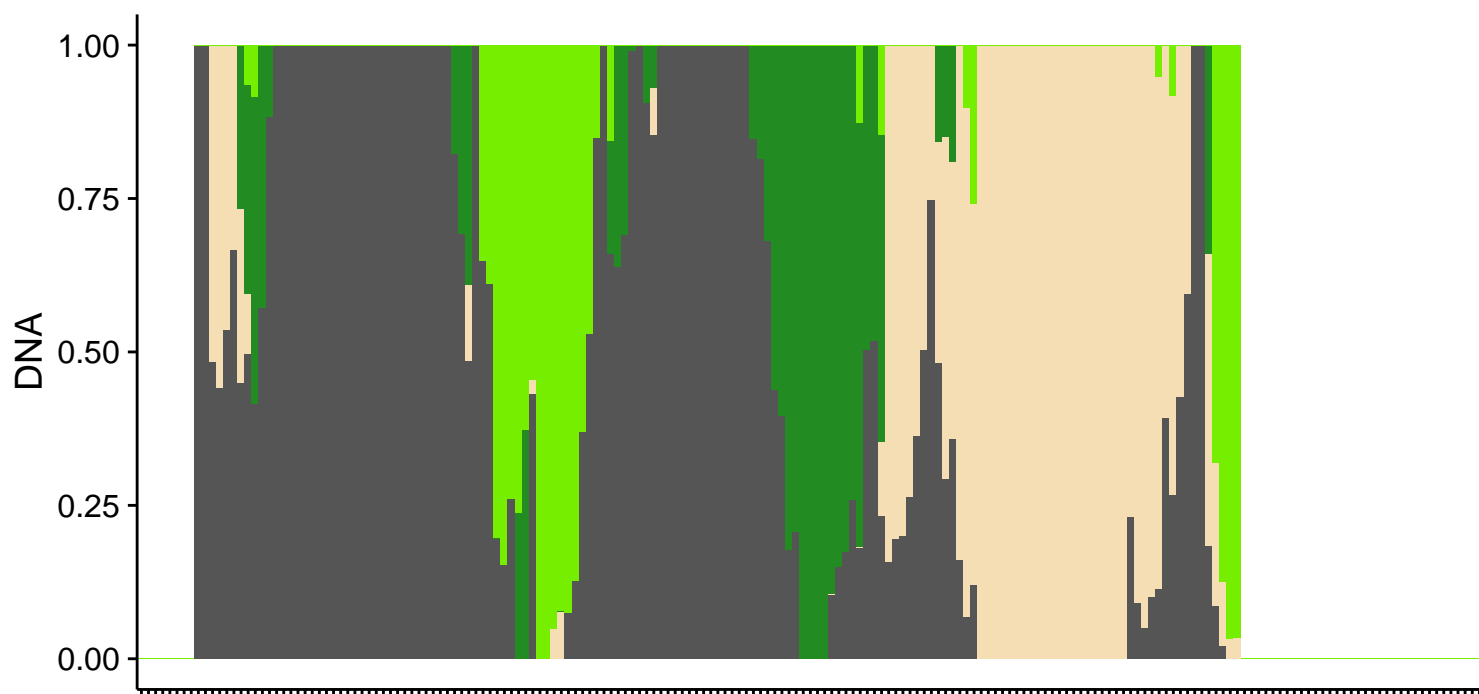

Person-week pair (DNA>0 n = 147)

PWY-7357: thiamin formation from pyrithiamine and oxythiamine (yeast)

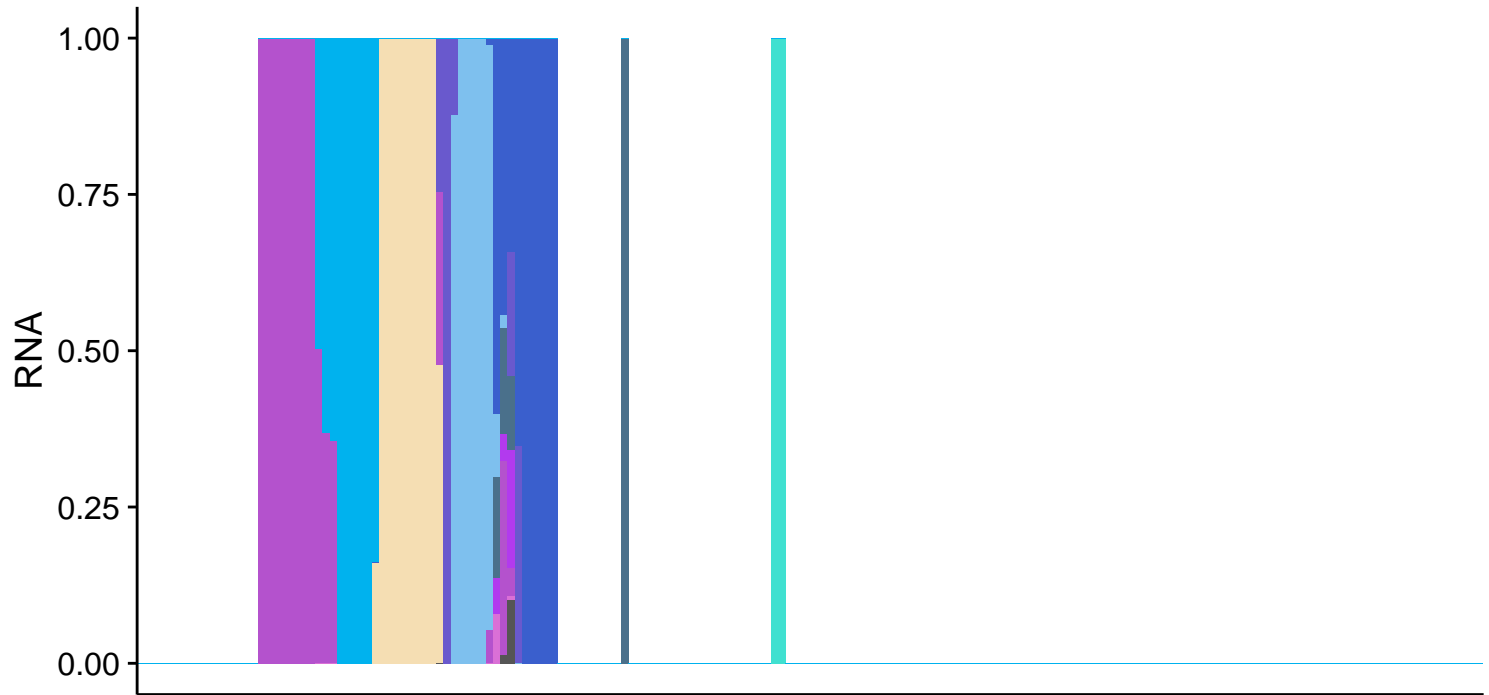

Bug

- █ *Eubacterium siraeum*
- █ *Faecalibacterium prausnitzii*
- █ *Roseburia intestinalis*
- █ *Roseburia hominis*
- █ *Roseburia inulinivorans*
- █ *Ruminococcus torques*
- █ *Ruminococcus obeum*
- █ *Ruminococcus bromii*
- █ *Lachnospiraceae bacterium 5 1 63FAA*
- █ *Phascolarctobacterium succinatutens*
- █ *Escherichia coli*
- █ *Klebsiella pneumoniae*
- █ *Methanobrevibacter smithii*
- █ *other*

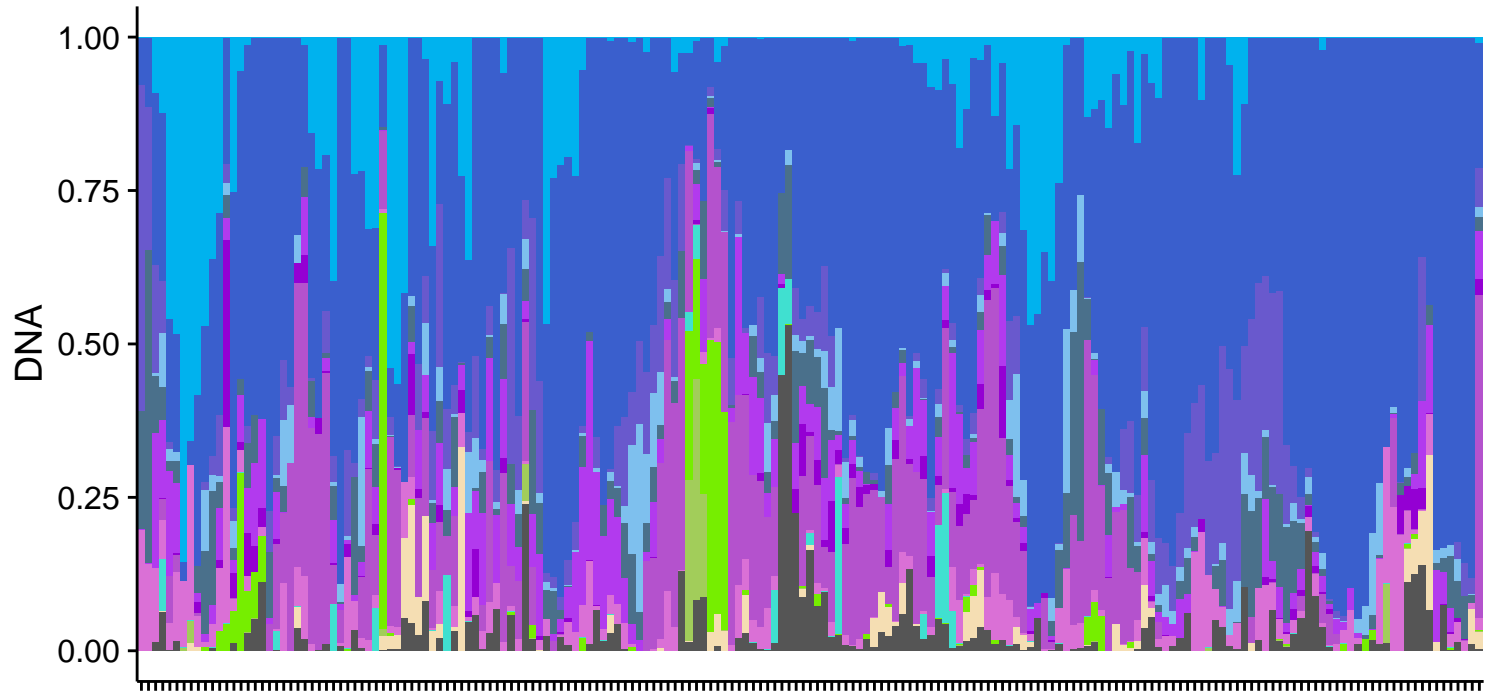



# PWY-6936: seleno-amino acid biosynthesis

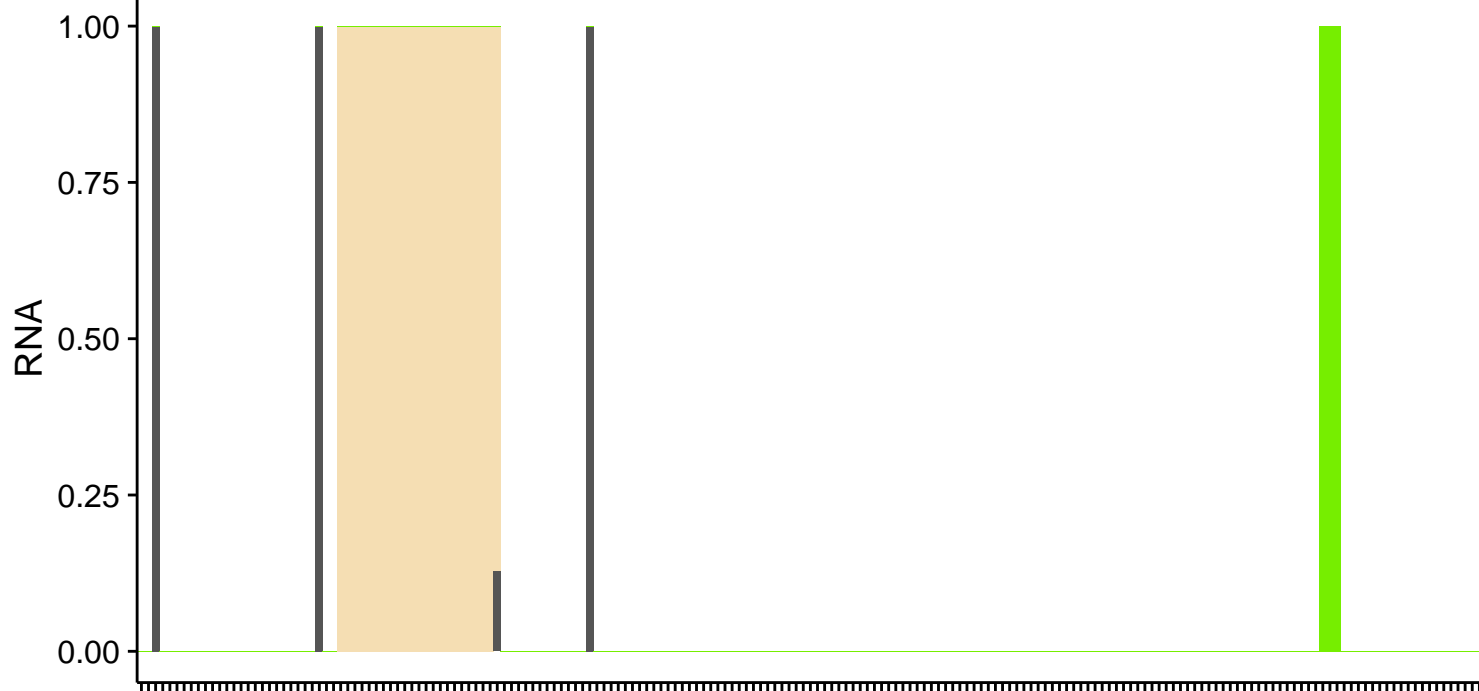

## Bug

- Lachnospiraceae bacterium 5\_1\_63FAA*
- Rothia mucilaginosa*
- Escherichia coli*
- Klebsiella pneumoniae*
- Haemophilus parainfluenzae*
- Methanobrevibacter smithii*
- other

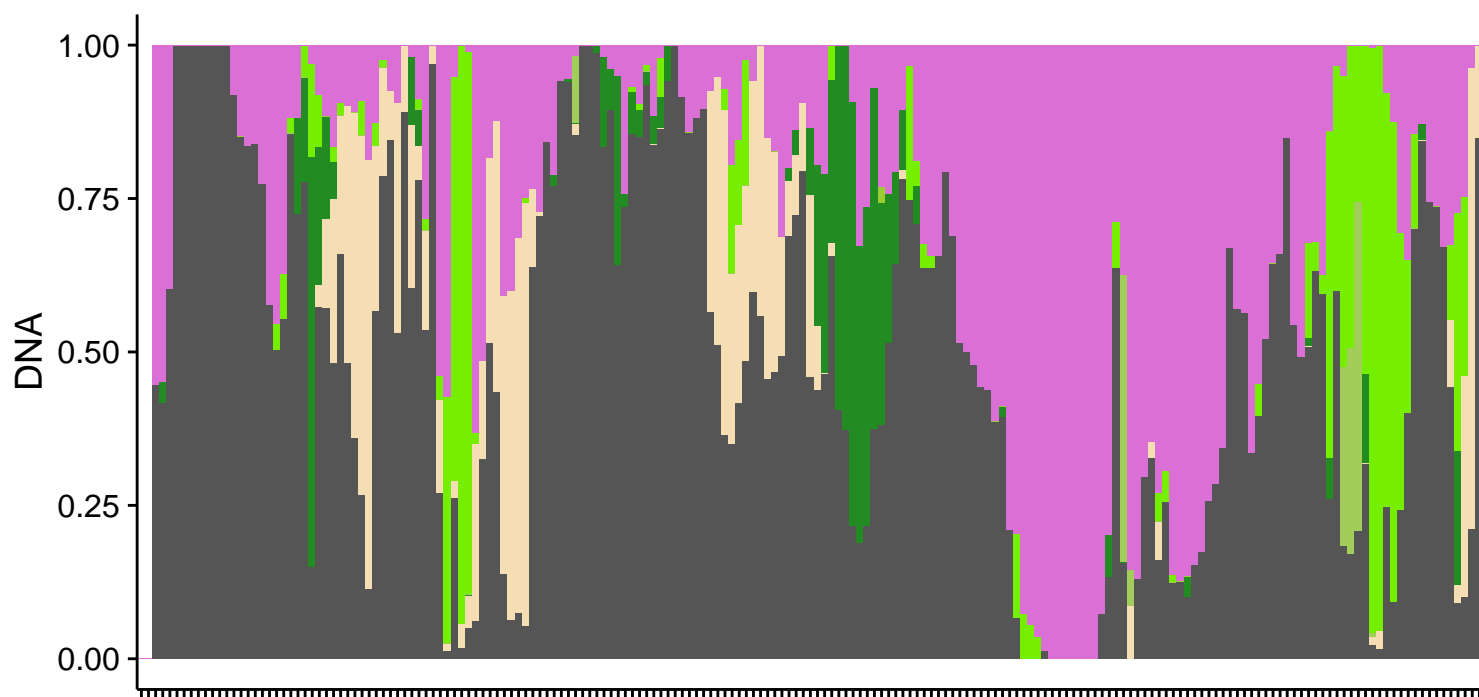

Supplement: NIHMS922671-supplement-Supplementary_Figure_8.pdf [file NIHMS922671-supplement-Supplementary_Figure_8.pdf]
