# Supplementary material
Source: PubMed Central journal article supplement (PMC6557121)

*Alistipes putredinis*, n=218

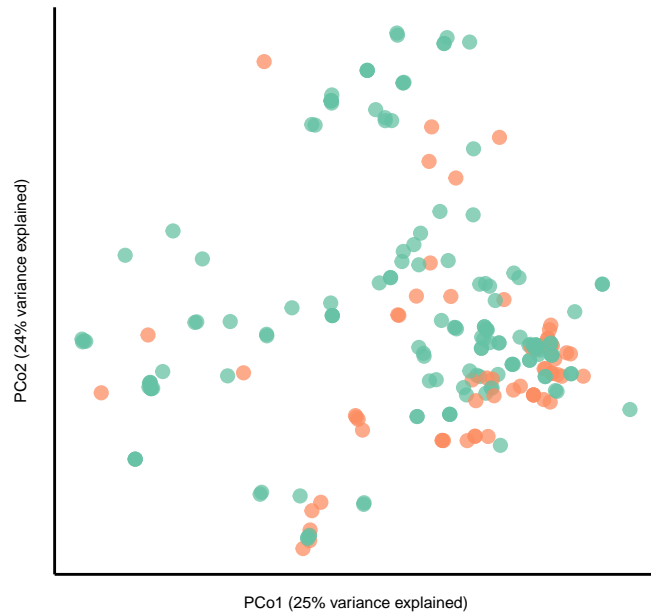

*Bacteroides dorei*, n=177

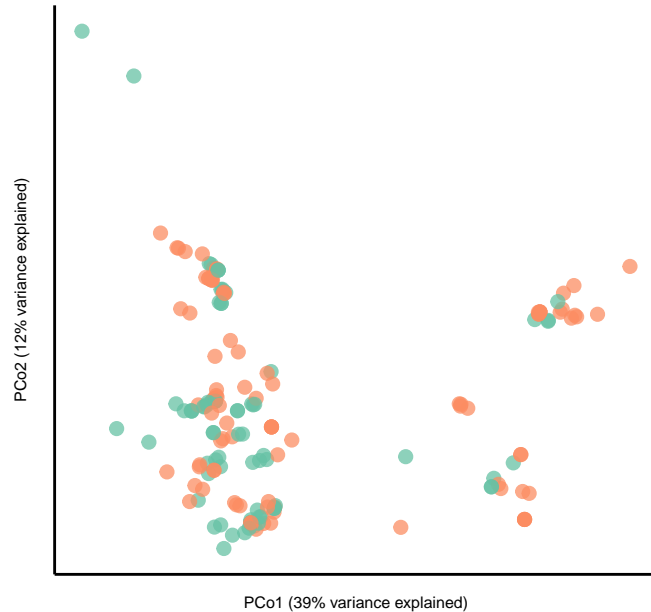

*Bacteroides cellulosilyticus*, n=138

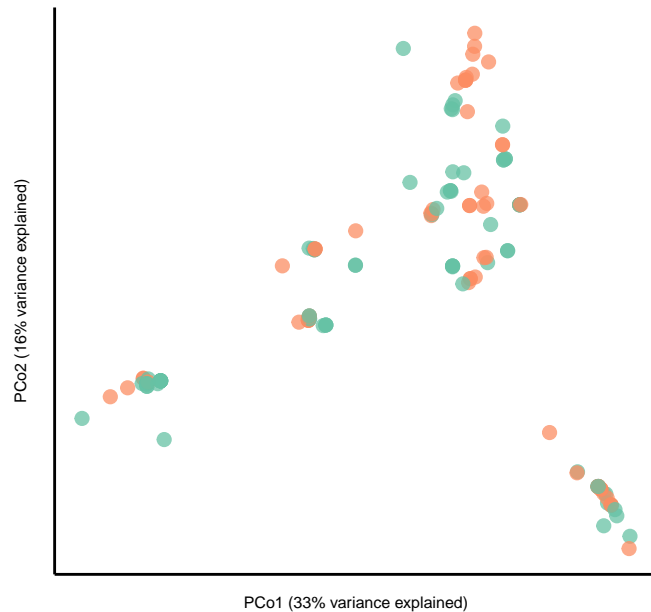

*Bacteroides eggerthii*, n=123

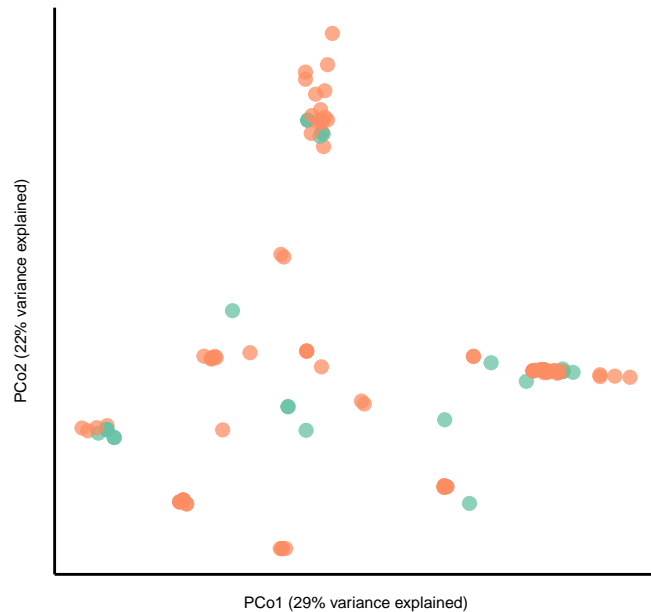

*Bacteroides intestinalis*, n=25

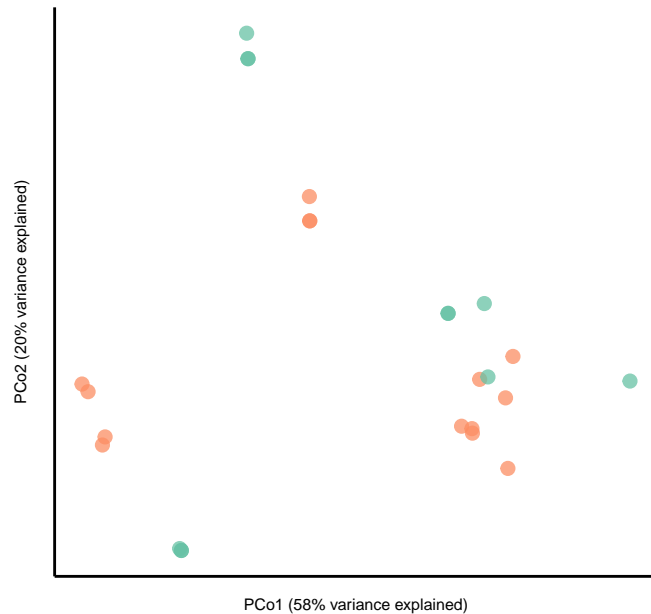

*Bacteroides stercoris*, n=197

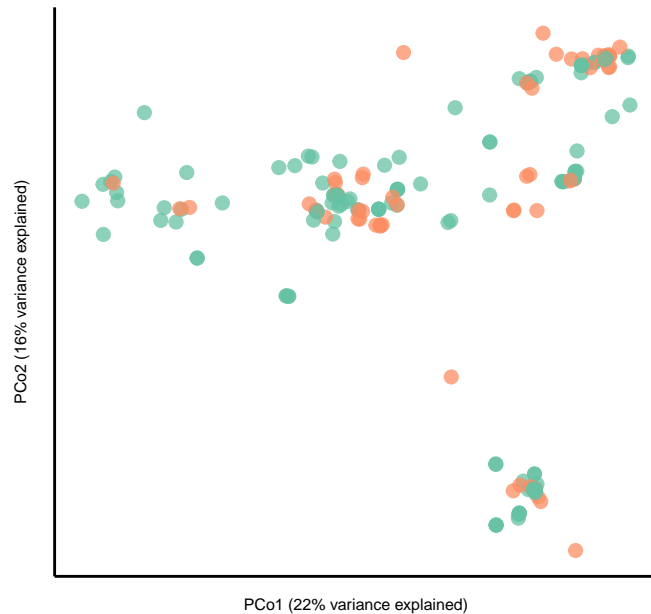

*Bacteroides massiliensis*, n=100

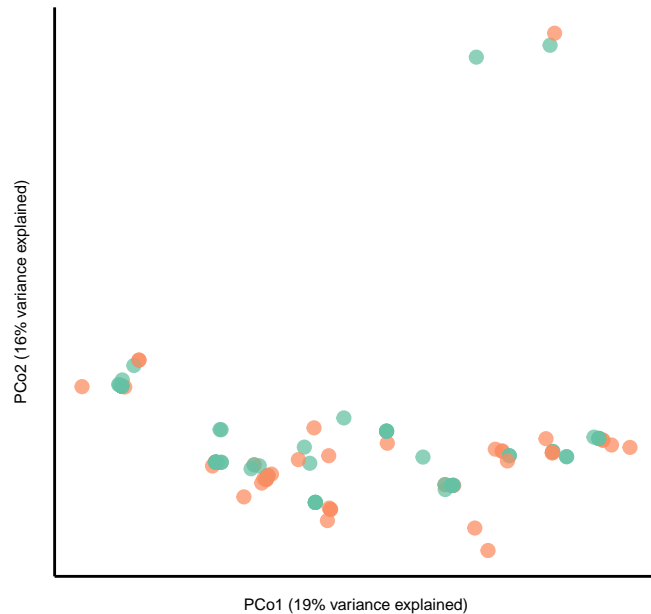

*Bacteroides uniformis*, n=362

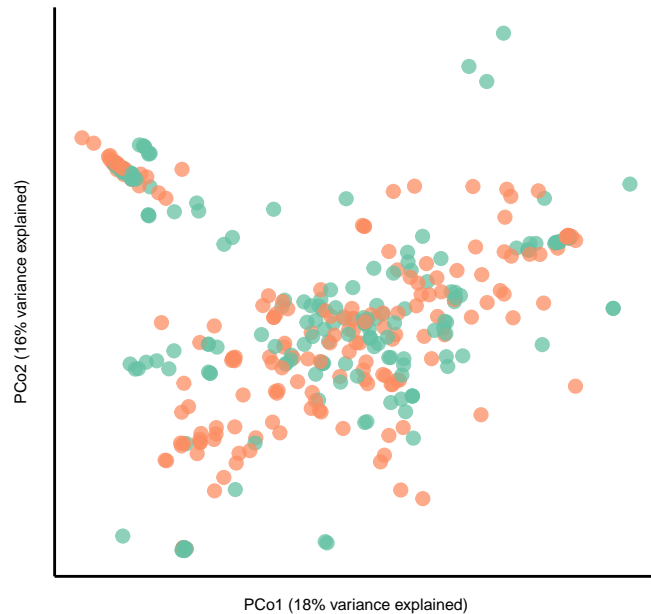

*Bacteroides vulgatus*, n=44

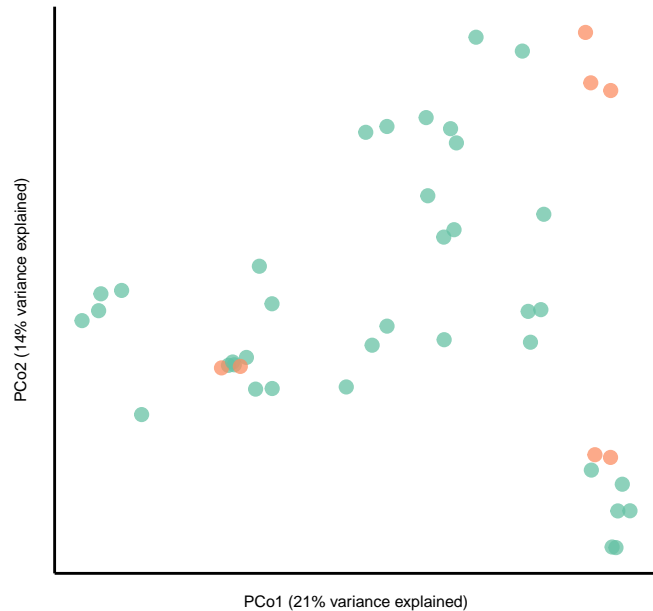

*Butyrivibrio crossotus*, n=77

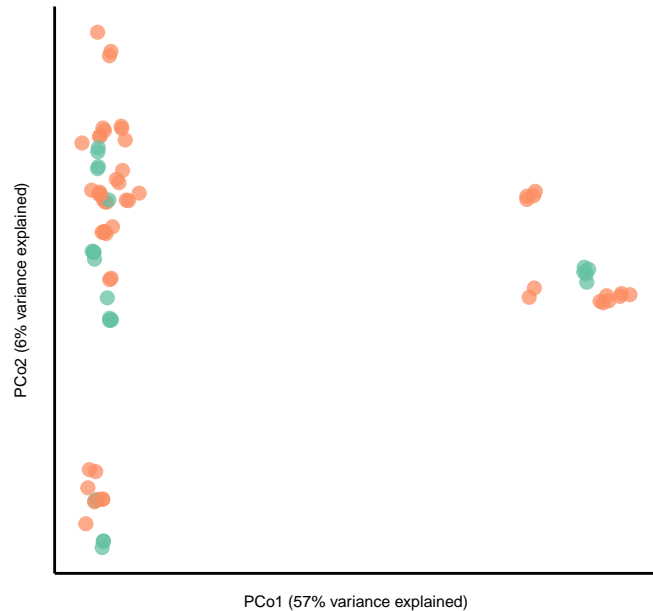

*Bifidobacterium adolescentis*, n=146

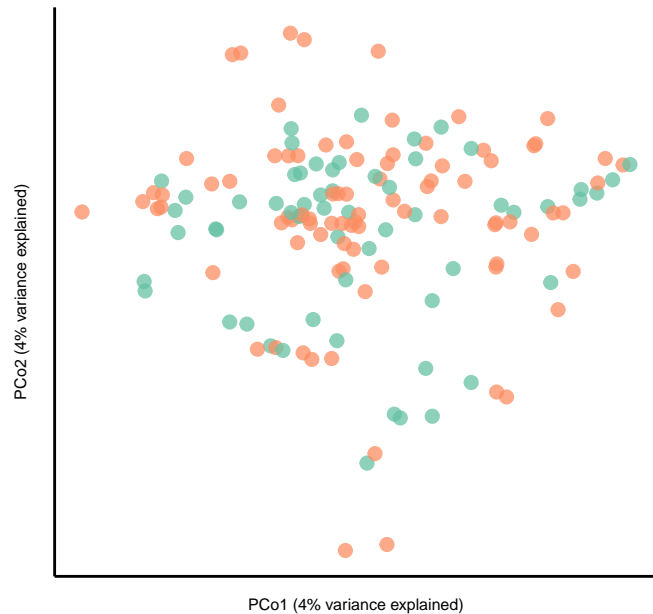

*Clostridium* sp I2 50, n=43

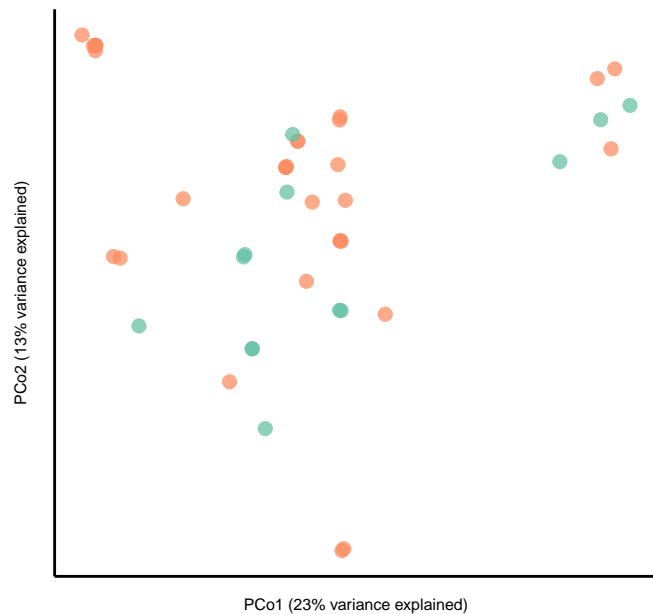

*Coprococcus eutactus*, n=22

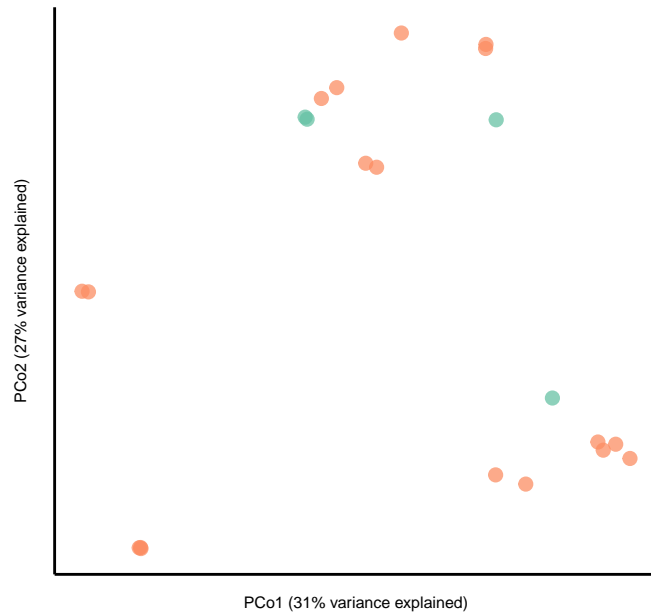

*Dialister invisus*, n=92

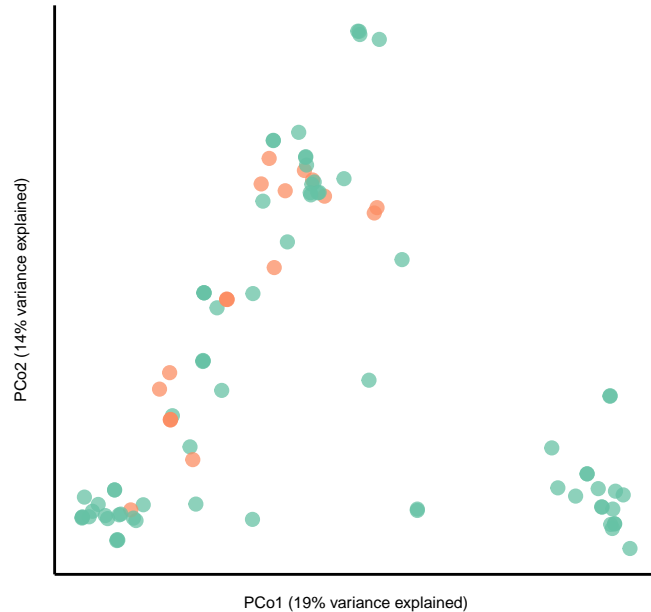

*Coprococcus sp art55 1*, n=89

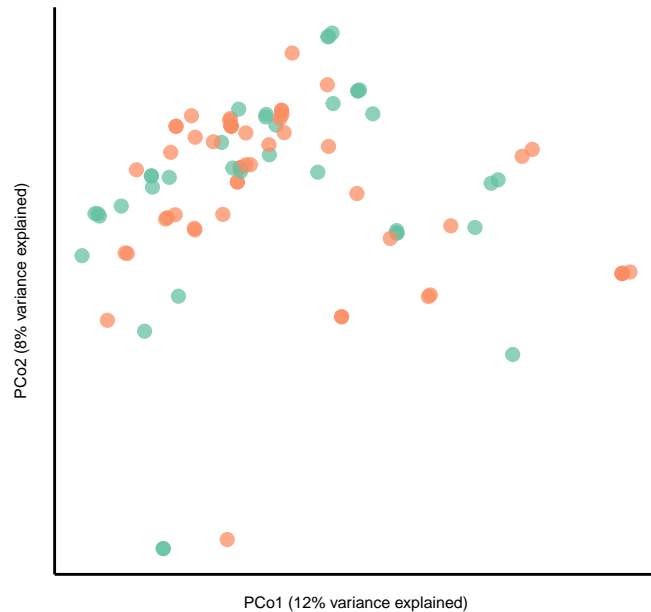

*Eubacterium ellgens*, n=17

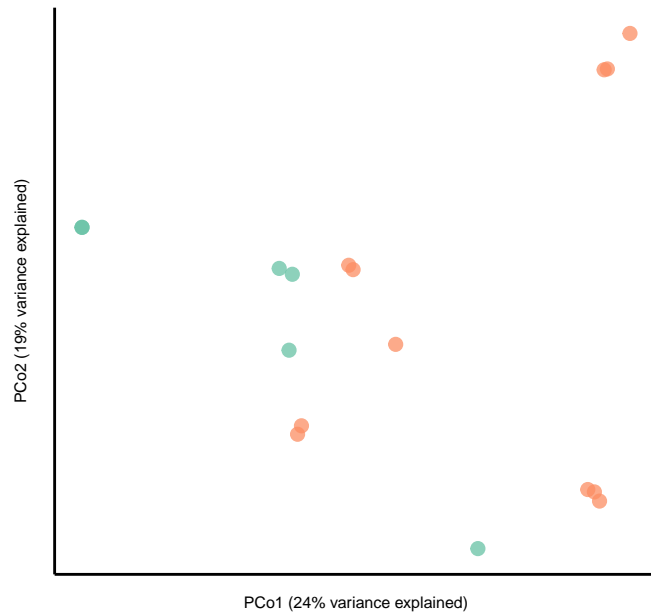

*Eubacterium rectale*, n=894

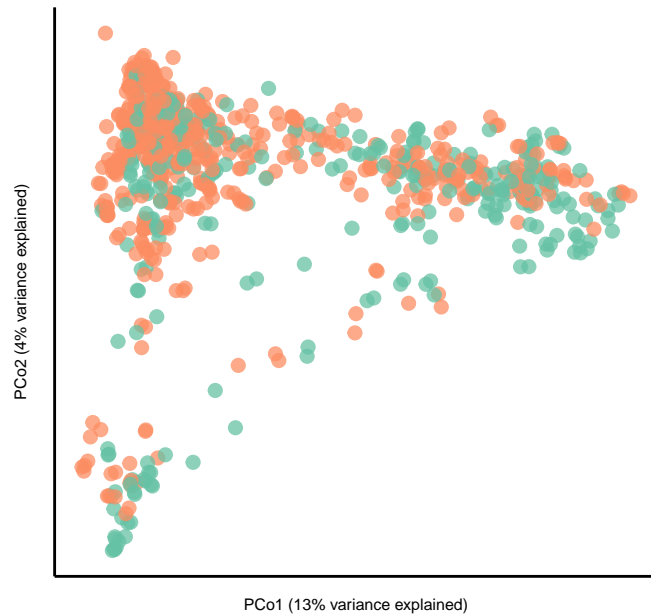

*Faecalibacterium prausnitzii*, n=679

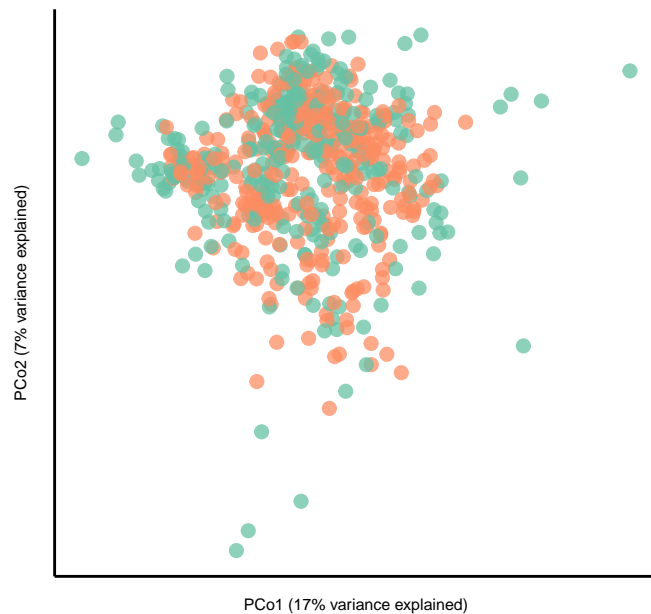

*Eubacterium siraeum*, n=355

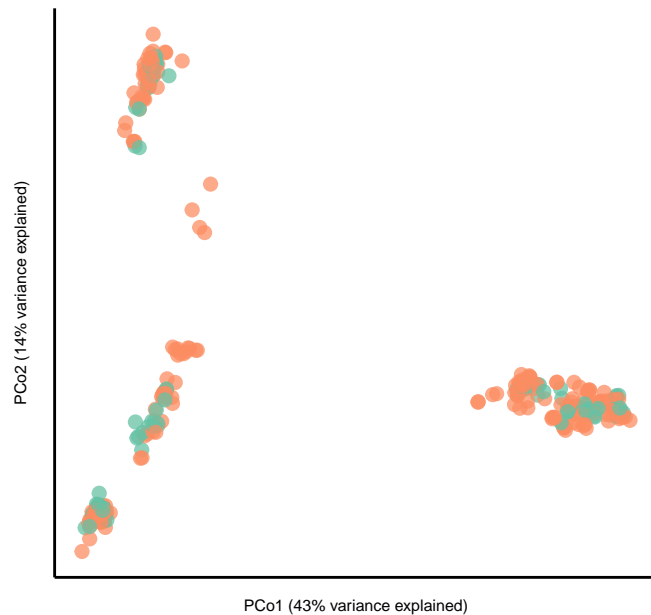

*Ruminococcus bromii*, n=112

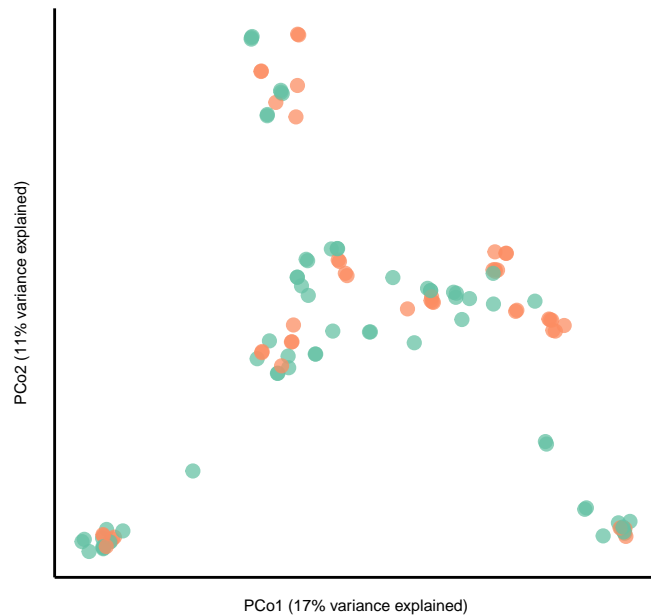

*Ruminococcus* sp 5 1 39bfaa, n=10

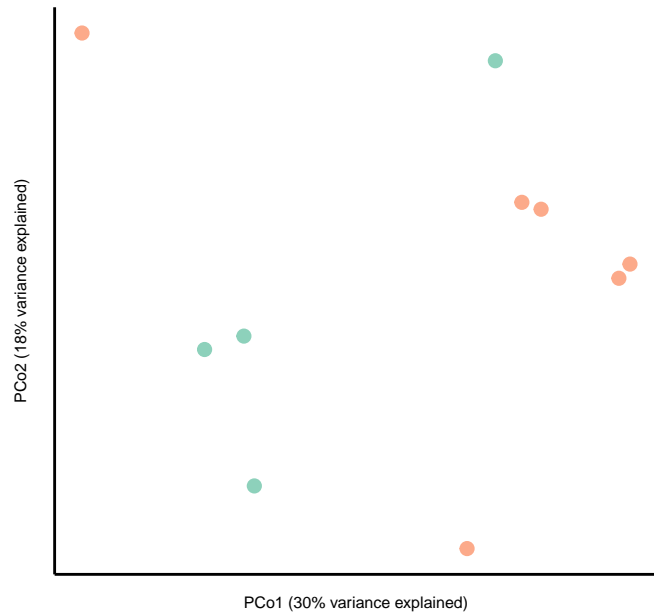

Supplement: NIHMS922671-supplement-Supplementary_Figure_10.pdf [file NIHMS922671-supplement-Supplementary_Figure_10.pdf]
