# Supplementary material
Source: PubMed Central journal article supplement (PMC6557121)

1 **Title**

2 **Metatranscriptome of human fecal microbial communities in a cohort**  
3 **of adult men**

4 **Supplementary information – SI**

5  
6 Galeb S. Abu-Alt<sup>a,c,1</sup>, Raaj S. Mehta<sup>d,1</sup>, Jason Lloyd-Price<sup>a,c</sup>, Himel Mallick<sup>a,c</sup>, Toby Branck<sup>a,g</sup>,  
7 Kerry L. Ivey<sup>b,h</sup>, David A. Drew<sup>d,e</sup>, Casey DuLong<sup>a</sup>, Eric Rimm<sup>b,i</sup>, Jacques Izard<sup>f</sup>, Andrew T.  
8 Chan<sup>c,d,e,i,1,2</sup>, Curtis Huttenhower<sup>a,c,1,2</sup>

9 <sup>a</sup>Biostatistics Department and <sup>b</sup>Department of Nutrition, Harvard T. H. Chan School of Public  
10 Health, Boston, MA 02115; <sup>c</sup>The Broad Institute, Cambridge, MA 02142; <sup>d</sup>Clinical and  
11 Translational Epidemiology Unit, <sup>e</sup>Division of Gastroenterology, Massachusetts General Hospital  
12 and Harvard Medical School, Boston, MA 02114; <sup>f</sup>University of Nebraska, Lincoln, 1901 North  
13 21 Street, Lincoln, NE 68588; <sup>g</sup>U.S. Army Natick Soldier Systems Center in Natick, MA 01760,  
14 <sup>h</sup>South Australian Health and Medical Research Institute, Infection and Immunity Theme, School  
15 of Medicine, Flinders University, Adelaide, Australia, 5000; <sup>i</sup>Channing Division of Network  
16 Medicine, Department of Medicine, Brigham and Women's Hospital  
17

18 <sup>1</sup>Contributed equally to this work

19 <sup>2</sup>To whom correspondence should be addressed:

20 Curtis Huttenhower  
21 Harvard T. H. Chan School of Public Health  
22 Department of Biostatistics  
23 655 Huntington Avenue  
24 Building 1, Room 413  
25 Boston, Massachusetts 02115  
26 Phone: 617.432.4912  
27 [chuttenh@hsph.harvard.edu](mailto:chuttenh@hsph.harvard.edu)

28 Andrew T. Chan  
29 Massachusetts General Hospital  
30 Clinical and Translational Epidemiology Unit  
31 55 Fruit St, GRJ-825C  
32 Boston MA 02114  
33 [achan@mgh.harvard.edu](mailto:achan@mgh.harvard.edu)

34

## 35 **Supplementary Notes**

### 36 **Viruses detected from non-enriched metagenomes and metatranscriptomes do not reflect** 37 **variation of bacterial taxa**

38 A small number of both DNA and RNA viruses were quantified confidently by MetaPhlan2, which  
39 is likely an underestimate of the gut virome diversity since our extraction protocol did not enrich  
40 for virus-like particles. Of the 30 DNA viral species detected in the cohort, 29 were bacteriophage  
41 belonging primarily to the Siphoviridae (19) family, with few Myoviridae (6), Podoviridae (2), and  
42 Inoviridae (1) members, and one *Escherichia* phage of unknown taxonomy. The most common  
43 putative phage identifications were *C2likevirus* (in 116 participants), *Epsilon15likevirus* (in 16  
44 participants), and *Lactobacillus Lc Nu* (in 16 participants), however, no correlation was found  
45 between the abundance distribution of these Caudovirales phages and their natural host genera  
46 *Lactococcus*, *Escherichia*, and *Lactobacillus*; although power for detecting this is low given non-  
47 virally-enriched detection rates. In metatranscriptomes, we identified 88 RNA viral species  
48 belonging to 19 families. Apart from rare Leviviridae and Iflaviridae members, these were all plant  
49 viruses, in agreement with previous studies<sup>1</sup> and possibly due to dietary ingestion. Most RNA  
50 viruses were detected in <30 (10%) metatranscriptomes with the exception of *Pepper mild mottle*  
51 *virus* (48% prevalence) and *Tomato mosaic virus* (39% prevalence), which together accounted  
52 for 31% of viral RNA on average (when present). Although gut viral ecology is more difficult to  
53 analyze than that of the bacteriome due to inadequate viral reference sequences<sup>2</sup>, these methods  
54 allow for some incidental analysis of DNA phage and RNA plant viruses in human gut  
55 metagenomes and metatranscriptomes.

### 56 **Effect of GC content and ORF length on transcription ratios.**

57 We analytically evaluated the effect of GC content and ORF length on transcription ratios, finding  
58 no interaction (**Supplementary Fig. 5**). The 430 structured MetaCyc pathways analyzed here  
59 were quantified from 808,694 UniRef90 gene families (3.4% of the total UniRef90 database) that  
60 had detectable DNA in at least one sample in our study. Of those, 89,991 and 44,792 UniRef90s  
61 had non-zero DNA and RNA abundance in at least one sample, respectively. This resulted in  
62 37,085 pathway-associated UniRef90 gene families for which RNA/DNA ratios were calculated.  
63 Among these genes, there were no significant differences in ratio when stratified by either %GC  
64 or length of nucleotide sequences; when tested continuously, there was no significant correlation  
65 of either length or %GC with RNA abundances. Intriguingly, a very low effect size (Pearson's  $r <$   
66  $0.04$ ), but significant, correlation was observed between sequence length and DNA abundance.  
67 Given the comparability of DNA and RNA protocols in this study, it is not clear why this might  
68 have arisen, but at such a minimal effect size it does not affect the study's conclusions.

### 69 **Core and variable fecal metatranscriptomes differ from the metagenome.**

70 The distribution of transcript abundance ranged over four orders of magnitude among 210  
71 pathways that were transcribed in >10% of samples (**Supplementary Fig. 6F**). The highest  
72 transcription ratios consistently arose from pathways that were both low prevalence and  
73 taxonomically restricted, e.g. archaeal methanogenesis and coenzyme 420 biosynthesis, as  
74 previously suggested by our pilot study<sup>3</sup>. Following energy metabolism and fermentation, which  
75 tended to dominate in both prevalence and expression levels, the highest metatranscription was  
76 observed for saturated and unsaturated fatty acid elongation pathways, albeit in less than one-  
77 third of samples. Fatty acids are generated from acetyl-CoA, which in turn is produced mainly  
78 during glycolytic energy release, and together this may explain the concerted metatranscription  
79 of glycolysis and energy-expensive fatty acid elongation. As the primary role for bacterial fatty  
80 acids is to serve as precursors for cell membrane building blocks (e.g. phospholipids), this likely

81 signals widespread cell growth in the typical fecal microbiota<sup>4</sup>. On the other end of the spectrum,  
82 pathways with the lowest metatranscription had mean RNA abundances below their  
83 corresponding DNA relative abundances, with prevalence of metatranscription ranging between  
84 15% (sulfate assimilation/cysteine synthesis) and 95% (peptidoglycan synthesis) of samples. This  
85 low tail of metatranscription included several amino acid synthesis pathways, including  
86 methionine, homoserine, aromatic and seleno-amino acids, followed by cofactor biosynthesis,  
87 including thiamine (and variants), tetrapyrrole, etc. Prevalent metatranscription of degradation of  
88 stachyose (PWY-6527), a legume-derived non-digestible tetrasaccharide that promotes SCFA  
89 producers, may reflect diet preferences. Together, these findings would underline that the fecal  
90 microbiome does not prioritize *de novo* synthesis of amino acids or widespread activation of  
91 specialized functions, yet displays high dynamic range and milieu activities such as transformation  
92 of phenolics, stress adaptation, and secondary metabolism.

### 93 **Genetic divergence patterns of stool-associated bacterial strains is species-specific and** 94 **preserved among host populations**

95 Nucleotide substitution rates within and between cohorts were strikingly similar for the compared  
96 species, indicating that species' evolutionary strategies within the stool niche were comparable  
97 between these host populations (**Fig. 6C**). The amount of genetic change was higher for  
98 Firmicutes than Bacteroidetes and did not appear to be simply a function of species prevalence  
99 in the two cohorts. For example, *Bacteroides dorei* and *uniformis*, and *Alistipes putredinis* had  
100 comparable prevalence with *Ruminococcus bromii*, *Dialister invisus*, and *Eubacterium rectale*, yet  
101 appreciably fewer nucleotide substitutions between strains. This may be due to *Bacteroides*  
102 species' more restrictive definitions by systematics<sup>5</sup>, serving as a reminder that culture-based  
103 isolate information and culture-independent microbial profiling may need further resolution as  
104 strain and transcriptional meta'omics are explored.

### 105 **Species-function relationships in fecal meta'omes.**

106 We quantified how tightly was each pathway coexpressed - that is, the extent to which the multiple  
107 enzymes making up each pathway were expressed at similar abundances within each organism  
108 and meta'ome (**Supplementary Dataset 4**). This was assessed using the average variance of  
109 gene families' transcription log ratios across samples (see **Methods**), here termed the EC  
110 dispersion. The distribution of dispersions from all pathways' ECs was significantly below 1 (one-  
111 sided t-test  $P=1.1 \times 10^{-16}$ ), with a mean of 0.89, indicating that functionally-related genes are co-  
112 expressed on average. Tightly coexpressed pathways (low dispersion) included methanogenesis  
113 (dispersion 0.26), two pathways for L-histidine degradation (0.38, 0.39), and degradation of the  
114 glutaryl-CoA (0.49) intermediate of tryptophan and lysine metabolism. Tryptophan and histidine  
115 are among the energetically most expensive amino acids to synthesize<sup>6,7</sup>, for which tight co-  
116 expression of degradation pathway is not surprising. No evidence was found for a relationship  
117 between EC dispersion and the number of species that transcribed the pathway (Spearman rho -  
118 0.01). Differences between pathways that were considered a part of the core or variably  
119 expressed metatranscriptome were also not detected (Wilcoxon rank-sum test p-value 0.10).

120

121 **Supplementary Discussion**

122 We briefly review here the current literature on the topic of microbiome sample stabilization with  
123 RNAlater. The reported minor effect of choice of sample handling method on microbiome  
124 composition<sup>8</sup> lacks testing for statistical significance of any variance, suggesting that between-  
125 condition variation in that study was comparable to replicate variation (and much smaller than  
126 population variability). In addition to our own validation work<sup>3</sup>, which indicates a negligible effect  
127 of RNAlater on microbial community composition, there are numerous reports on the evaluation  
128 of methods for storage and handling of microbiome samples in a cohort setting. These studies  
129 reveal a lack of significant alteration in community structure between samples preserved with  
130 RNAlater, ethanol, lyophilization, fecal occult blood test cards, and freezing at -80°C<sup>9-14</sup>.

131 The recent Choo et al. study<sup>15</sup> reports a statistically significant effect of storage method on  
132 microbial community composition, based on assessing the variation among differently stored  
133 samples collected from one individual sampled three times over 30 days. However, Choo et al.  
134 report that the variation attributable to storage method is markedly smaller than the variation  
135 explained by different sample time points (i.e. smaller than intra-individual difference, which in  
136 turn is far smaller than inter-individual difference). Notably, the variation introduced by RNAlater,  
137 relative to freezing at -80°C, was comparable to that introduced by sample storage in  
138 OMNIGene.Gut, another popular sample stabilization kit. Furthermore, significant but localized  
139 differences in taxon abundance relative to freezing were comparable among RNAlater and  
140 OmniGene.Gut. Finally, Choo et al evaluated stool samples from a single subject, which are not  
141 likely to be representative at the population level.

142

143

144

## 145 **Supplementary Figures**

146 Please note that **Supplementary Figures 6-10** are multi-panel, multi-page figures that were  
147 submitted as separate files due to their length and size.

148 **Supplementary Figure 1. Taxonomic profiles of gut metagenome ecology and stability.**  
149 Summaries of taxonomic membership and population diversity in the MLVS, which broadly agree  
150 with previous comparable gut metagenome profiles<sup>16-18</sup>. **A)** Inter-individual variation of major  
151 phyla. Seven out of fourteen phyla were found present at a relative abundance >0.1% with a  
152 prevalence >10%. Panels indicate collection time points, with the number of participants in  
153 parenthesis, and samples ordered by decreasing mean abundance of the most abundant phylum  
154 (Firmicutes). **B)** Relative abundances of most abundant (when present) species (rows) across  
155 913 samples. Columns in the heatmap were ordered based on average linkage clustering on a  
156 Euclidean distance matrix of log<sub>10</sub> relative abundances. The grey color indicates that the species  
157 was not detected. **C)** Principal coordinates ordination of 307 subjects on Bray-Curtis dissimilarity  
158 between abundance profiles for 139 species (detected in ≥10% samples at ≥0.01% abundance)  
159 averaged over time points and colored by sequencing depth, and each point in the ordination is  
160 one participant. The ordination of taxonomic profiles averaged for individual time points shows no  
161 bias from variability in input sequencing depth of samples. Labels t1-t4 represent sampling time  
162 points; samples were self-collected in two pairs (t1-t2 and t3-t4), six months apart, with each pair  
163 spanning 2-3 days.

164 **Supplementary Figure 2. Variation in genus composition among MLVS, HMP1-II, and**  
165 **ELDERMET cohorts.** PCoA of Bray-Curtis dissimilarities in genus composition of samples from  
166 **(A)** the ELDERMET cohort (participant age >65 yrs) reported by Claesson *et al*<sup>19</sup>, **(B)** the  
167 ELDERMET, MLVS (age range 65-81 yrs) and HMP1-II (age range 20-40 yrs) cohorts based on  
168 the intersection of genera detected in all three cohorts, and **(C)** the ELDERMET, MLVS and  
169 HMP1-II cohorts based on the union of *all* genera detected in the three cohorts. Cohort sample  
170 numbers are in parenthesis. Only genera with abundances ≥0.01% in ≥10% of samples in  
171 respective cohorts were used for ordination analysis; i.e. 42, 57, and 52 genera in ELDERMET,  
172 MLVS, and HMP1-II cohorts. **A)** Taxonomic composition of the ELDERMET cohort reported in<sup>19</sup>  
173 was recapitulated in our analysis indicating that 72% samples were dominated by Bacteroidetes  
174 with 56% average abundance across all 192 samples; Firmicutes averaged 39% abundance per  
175 sample. In contrast to Claesson *et al*<sup>19</sup>, though, we found that the control samples (9 young  
176 adults) in the ELDERMET cohort also contained Bacteroidetes at a slightly higher average  
177 abundance (45%) than Firmicutes (43%). Such differences in resulting taxonomic profiles are  
178 likely a consequence of different OTU calling pipelines. Claesson *et al* used the RDP tool suite  
179 version 10.16 whereas we used UPARSE version 9.0.2132 for *de novo* OTU clustering and the  
180 RDP classifier version 2.2 for taxonomic classification of OTU centroid sequences against the  
181 Greengenes 13\_8 database. **B)** Twenty-seven genera represented the taxonomic intersection of  
182 all three cohorts. In our MLVS data, taxonomic profiling reinforced Firmicutes and Bacteroidetes  
183 as the dominant provenance of bacterial clades, and, unlike in young adults of the HMP1-II  
184 cohort<sup>20,17</sup>, the proportion was tilted in favor of Firmicutes (50.6% ± 14.3%; mean ± s.d.) over  
185 Bacteroidetes (40.4% ± 14.3%) in the MLVS. One potential confounder in this comparison is the  
186 different DNA extraction protocol between MLVS and HMP, which was more efficient in extracting  
187 Bacteroidetes DNA from HMP samples<sup>21,22</sup>. **C)** Seventy genera represented the taxonomic union  
188 of all three datasets and, in addition to sample processing, the comparison is biased by  
189 differences in taxonomic assignment strategies for metagenomic and amplicon sequencing reads.  
190 Explicit comparison with data from an ELDERMET publication including whole metagenome  
191 shotgun (WMS) sequence data<sup>18</sup> was not possible as neither WMS nor 16S sequencing reads  
192 from that study are available from the MG-RAST server where the data were deposited

193 (<http://metagenomics.anl.gov/mgmain.html?mgpage=project&project=mgp154>). Taken together,  
194 these larger metagenomic and new metatranscriptomic data showed a greater enrichment for  
195 Firmicutes, clearer resolution at the species level, and fewer signs of instability or directly age-  
196 linked configurations, possibly due to the comparably high level of population health despite  
197 participant age. All numbers in parenthesis are stool metagenome sample counts from a total of  
198 307 MLVS, 253 HMP (male and female), and 170 ELDERMET (male and female) participants.

199 **Supplementary Figure 3. Feature detection as a function of sequencing depth.** Effect of  
200 sample sequencing depth on the ability to detect microbiome functional features in metagenomic  
201 and metatranscriptomic sequence data. HUMAnN2 functional profiling of DNA and RNA quality  
202 filtered reads was performed on individual samples in species-specific mode, i.e. nucleotide  
203 alignment against pangenomes of species identified in the sample with MetaPhlAn2, and in  
204 combined species-specific and -agnostic mode, in which reads not matching any pangenome  
205 reference sequences were subjected to DIAMOND<sup>23</sup> translated searching against the UniRef90  
206 database. Each sample is represented by a green and blue point in each plot. Linear regression  
207 trends with 95% confidence intervals are represented by straight lines and grey shading in each  
208 plot. Four plots per row from left to right show read alignment rates, and counts of detected  
209 UniRef90 gene families, enzymes, and pathways as a function aligned read counts, for 913 DNA  
210 samples (A) and 347 RNA samples (B). The number of gene families detected in metagenomic  
211 samples increased by less than half a log over a log difference in sequencing depth (A), but well  
212 over one log for metatranscriptomes (B) indicating great transcriptional capacity of the gut  
213 metagenome. Detection of UniRef90 transcripts Increasing sequencing depth would improve  
214 feature detection from RNA samples whereas feature detection was saturated with these input  
215 DNA read counts. C) Species rarefaction curve for samples with total counts above the 1<sup>st</sup> decile  
216 (836 samples). The vertical reference line is set at 50,000; at rarified count of 50,000 the median  
217 ratio of rarified to observed number of species of samples nears one (boxplot inset). On average,  
218 3.5% of input reads per sample were considered by MetaPhlAn2, implying per sample saturation  
219 at <1.5M input reads which is roughly seven times less than the average per sample sequencing  
220 depth after quality control (9.3M paired-end reads). The ratio of the Chao extrapolated richness  
221 from all samples ('specpool' function in the R/vegan package) to the observed number of species  
222 in all samples, indicated 89.9% species saturation in the MLVS cohort. D) Rarefaction curves of  
223 UniRef90 gene family abundances, using data from samples with total counts above the 9<sup>th</sup> decile  
224 (93 samples), plateaus at a count of 5M. This was also indicated by boxplot summaries of rarefied  
225 to observed UniRef90 ratios (inset). The per-sample average read usage rate by HUMAnN2 was  
226 60%, implying per sample saturation at 8.3M quality filtered reads. E) For UniRef90 transcript  
227 abundances, curves plateau at similar rarefaction levels based on analysis of 184 samples with  
228 highest total counts. Average sequencing depth for RNA samples was 6.7M paired-end reads,  
229 after quality control. Boxplot whiskers represent 1.5 times the inter-quartile range from the first  
230 and third quartiles. RPKs – reads per kilobase.

231 **Supplementary Figure 4. Definition of core metatranscriptome that is robust to sequencing**  
232 **depth.** Number of pathways (from a total of 340) with prevalence exceeding the given threshold,  
233 calculated from 341 samples with RNA sequencing depth greater than 1M, 2M, 4M, and 8M reads.  
234 A change in slope is observed at 81 pathways, which is robust to changes in sequencing depth.  
235 These pathways were thus defined as “core”.

236 **Supplementary Figure 5. UniRef90 gene and DNA-normalized transcript abundance is not**  
237 **biased by GC content and ORF length.** A) RNA/DNA ratios for gene families (UniRef90s, total  
238 n=37,085) do not vary significantly by GC content, plotted as deciles from the lowest to highest  
239 %GC in gene families analyzed in 341 metagenome-metatranscriptome paired samples from 96  
240 MLVS participants. GC content was calculated as an average across a single representative

241 nucleotide sequence per UniRef90 family. Boxplot whiskers represent 1.5 times the inter-quartile  
242 range from the first and third quartiles. Half-open interval labels for x-axis ticks include only the  
243 second endpoint, e.g. (0,1] includes values greater than zero and less than or equal to 1. **B)** When  
244 analyzed continuously (rather than quantized), neither DNA abundance nor RNA abundance of  
245 each UniRef90 gene family (one per point) is strongly correlated with %GC. Additionally, this small  
246 degree of %GC bias does not differ between DNA vs. RNA abundances. **C)** As above, RNA/DNA  
247 ratios for gene families do not vary significantly by gene length, as deciles from highest to lowest  
248 lengths across gene families. Length was again calculated using a single representative  
249 sequence per UniRef90. Boxplot whiskers represent 1.5 times the inter-quartile range from the  
250 first and third quartiles. **D)** As above, neither DNA nor RNA abundance of UniRef90 gene families  
251 were strongly correlated with length. A slightly greater association was detected between greater  
252 metagenomic (but not metatranscriptomic) abundance of shorter genes, but even this weak  
253 association was of extremely low effect size (maximum absolute Pearson correlation <0.04).

254 **Supplementary Figure 6. Core and variable metatranscriptomes of the stool microbiome,**  
255 **with pathway definitions and distribution range of pathway transcript abundances.** DNA-  
256 normalized transcript abundances for 239 gut microbiome pathways with detectable RNA in >10  
257 of the 341 metatranscriptomes, collected from 96 MLVS participants. **A)** Core metatranscriptome  
258 pathways (transcribed in >80% of samples) with RNA:DNA transcription ratio >1. **B)** Low-  
259 expression core metatranscriptome pathways with transcript abundance detectable in >80% of  
260 samples but an RNA:DNA ratio <1. **C)** Variably metatranscribed pathways detected in DNA but  
261 below detection in at least half of RNA samples, and **D)** variably metatranscribed pathways below  
262 detection in DNA (and matching RNA) in 30%-80% of the 341 samples. **E)** Thirty-eight pathways  
263 that do not fall into any of the categories depicted in **A-D**. **F)** Pathways with the 30 highest and 30  
264 lowest mean DNA-normalized transcript abundances among the 341 metatranscriptome samples.  
265 Points indicate individual samples with medians overlaid per pathway, with prevalence in  
266 parenthesis; see Supplementary Notes for supplementary results text.

267 **Supplementary Figure 7. Per pathway species contributions to metagenomes and**  
268 **metatranscriptomes.** Each point in a given pathway plot is a contributing species, and species  
269 contributions to DNA and RNA are expressed as relative abundances; i.e. the average  
270 abundances from 341 metagenome-metatranscriptome sample pairs from 96 participants. For  
271 example, if DNA or RNA for a given pathway is contributed by a single species, based on species-  
272 specific HUMAnN2 functional profiling, then the corresponding log<sub>10</sub> value along the x or y axis,  
273 respectively, is 1. Color scheme: red - species (points) that contributed more RNA than DNA for  
274 a given pathway; blue - species (points) that contributed more DNA than RNA for a given pathway;  
275 grey - species (points) that contributed equal levels of RNA and DNA for a given pathway. Number  
276 of species within each plot (n) and Spearman correlation coefficients (Rho) between species'  
277 contributions to DNA and RNA abundances of a pathway are provided in plot titles.

278 **Supplementary Figure 8. Species-stratified distributions of metagenomic potential (DNA)**  
279 **and metatranscriptomic activity (RNA) for all pathways with non-zero abundance in at least**  
280 **10% of samples.** The 40 most transcriptionally-active species are shown (additional species are  
281 grouped as "other"). Abundances were normalized within each pathway for 189 subject-week  
282 pairs, from 96 participants. For each pathway, the number of samples with non-zero RNA and  
283 DNA is given in the x-axis label. Subjects were ordered to emphasize blocks of subjects with  
284 similar metatranscriptomic profiles (see **Methods**). Pathways are sorted in decreasing order of  
285 their Weighted Spearman coefficients (see **Fig. 4B**).

286 **Supplementary Figure 9. Ecological interactions in the gut microbiome for individual time**  
287 **points.** Significant co-variation and co-exclusion relationships among 104 species in stool  
288 metagenomes of MLVS participants. Each node represents a species and edges correspond to

289 significant interactions inferred by BAnOCC (see **Methods**). Stool microbiome taxonomic profiles  
 290 were averaged within each participant for the first (215 participants) and second (258 participants)  
 291 collection pairs (separated by 6 months). 95% credible interval criteria was used to assess  
 292 significance, and only estimated absolute correlations with effect sizes  $\geq 0.15$  are reported.

293 **Supplementary Figure 10: Strain-level diversity is robust across cohorts.** Principal  
 294 coordinate analysis of pairwise nucleotide substitution rates among strains of 21 species identified  
 295 in stool metagenomes from MLVS and HMP1-II cohorts. Nucleotide substitution rates were  
 296 calculated from multiple sequence alignments using the Kimura Two-Parameter distance<sup>24</sup>. All  
 297 numbers in plot titles are sample counts in which indicated strains were above limit of detection;  
 298 from a total of 913 MLVS stool metagenomes and 564 HMP stool metagenomes (from 253 male  
 299 and female HMP participants) that were analyzed with StrainPhlAn.

300

301

302

303

304 **Supplementary Tables**

305 **Supplementary Table 1. Functional profiling of MLVS metagenomes and**  
 306 **metatranscriptomes.** UniRef90 gene families identified from DNA and RNA, plus those  
 307 characterizable to enzymes and pathways per sample and in the entire cohort.

|                 | Metagenome ( <i>n</i> = 913)             |                   | Metatranscriptome ( <i>n</i> = 347)      |                  |
|-----------------|------------------------------------------|-------------------|------------------------------------------|------------------|
|                 | Features per sample<br>(mean $\pm$ s.d.) | Unique in cohort* | Features per sample<br>(mean $\pm$ s.d.) | Unique in cohort |
| <b>UniRef90</b> | 173,609 $\pm$ 36,157                     | 1,569,171         | 32,279 $\pm$ 21,537                      | 602,896          |
| <b>ECs</b>      | 1045 $\pm$ 128                           | 1,909             | 623 $\pm$ 149                            | 1,570            |
| <b>Pathways</b> | 253 $\pm$ 40                             | 429               | 129 $\pm$ 48                             | 340              |

308 \* - Number of unique non-redundant features in entire cohort.



309 **SI References**

310  
311 1 Zhang, T. *et al.* RNA viral community in human feces: prevalence of plant pathogenic  
312 viruses. *PLoS Biol* **4**, e3, doi:10.1371/journal.pbio.0040003 (2006).  
313 2 Virgin, H. W. The virome in mammalian physiology and disease. *Cell* **157**, 142-150,  
314 doi:10.1016/j.cell.2014.02.032 (2014).  
315 3 Franzosa, E. A. *et al.* Relating the metatranscriptome and metagenome of the human  
316 gut. *Proceedings of the National Academy of Sciences of the United States of America*  
317 **111**, E2329-2338, doi:10.1073/pnas.1319284111 (2014).  
318 4 Zhang, Y. M. & Rock, C. O. Membrane lipid homeostasis in bacteria. *Nature reviews.*  
319 *Microbiology* **6**, 222-233, doi:10.1038/nrmicro1839 (2008).  
320 5 SHAH, H. N. & COLLINS, M. D. Proposal To Restrict the Genus *Bacteroides* (Castellani  
321 and Chalmers) to *Bacteroides fragilis* and Closely Related Species. *International Journal*  
322 *of Systematic and Evolutionary Microbiology* **39**, 85-87, doi:doi:10.1099/00207713-39-1-  
323 85 (1989).  
324 6 Akashi, H. & Gojobori, T. Metabolic efficiency and amino acid composition in the  
325 proteomes of *Escherichia coli* and *Bacillus subtilis*. *Proceedings of the National*  
326 *Academy of Sciences of the United States of America* **99**, 3695-3700,  
327 doi:10.1073/pnas.062526999 (2002).  
328 7 Bender, R. A. Regulation of the histidine utilization (hut) system in bacteria. *Microbiology*  
329 *and molecular biology reviews : MMBR* **76**, 565-584, doi:10.1128/MMBR.00014-12  
330 (2012).  
331 8 Reck, M. *et al.* Stool metatranscriptomics: A technical guideline for mRNA stabilisation  
332 and isolation. *BMC Genomics* **16**, 494, doi:10.1186/s12864-015-1694-y (2015).  
333 9 Song, S. J. *et al.* Preservation Methods Differ in Fecal Microbiome Stability, Affecting  
334 Suitability for Field Studies. *mSystems* **1**, doi:10.1128/mSystems.00021-16 (2016).  
335 10 Voigt, A. Y. *et al.* Temporal and technical variability of human gut metagenomes.  
336 *Genome biology* **16**, 73, doi:10.1186/s13059-015-0639-8 (2015).  
337 11 Vlckova, K., Mrazek, J., Kopečný, J. & Petrzalkova, K. J. Evaluation of different storage  
338 methods to characterize the fecal bacterial communities of captive western lowland  
339 gorillas (*Gorilla gorilla gorilla*). *J Microbiol Methods* **91**, 45-51,  
340 doi:10.1016/j.mimet.2012.07.015 (2012).  
341 12 Blekhman, R. *et al.* Common methods for fecal sample storage in field studies yield  
342 consistent signatures of individual identity in microbiome sequencing data. *Sci Rep* **6**,  
343 31519, doi:10.1038/srep31519 (2016).  
344 13 Flores, R. *et al.* Collection media and delayed freezing effects on microbial composition  
345 of human stool. *Microbiome* **3**, 33, doi:10.1186/s40168-015-0092-7 (2015).  
346 14 Vogtmann, E. *et al.* Comparison of Fecal Collection Methods for Microbiota Studies in  
347 Bangladesh. *Applied and environmental microbiology* **83**, doi:10.1128/AEM.00361-17  
348 (2017).  
349 15 Choo, J. M., Leong, L. E. & Rogers, G. B. Sample storage conditions significantly  
350 influence faecal microbiome profiles. *Sci Rep* **5**, 16350, doi:10.1038/srep16350 (2015).  
351 16 Qin, J. *et al.* A human gut microbial gene catalogue established by metagenomic  
352 sequencing. *Nature* **464**, 59-65, doi:10.1038/nature08821 (2010).  
353 17 Consortium, H. M. P. Structure, function and diversity of the healthy human microbiome.  
354 *Nature* **486**, 207-214, doi:10.1038/nature11234 (2012).  
355 18 Claesson, M. J. *et al.* Gut microbiota composition correlates with diet and health in the  
356 elderly. *Nature* **488**, 178-184, doi:10.1038/nature11319 (2012).  
357 19 Claesson, M. J. *et al.* Composition, variability, and temporal stability of the intestinal  
358 microbiota of the elderly. *Proceedings of the National Academy of Sciences of the*

359 *United States of America* **108 Suppl 1**, 4586-4591, doi:10.1073/pnas.1000097107  
360 (2011).

361 20 Lloyd-Price, J. *et al.* Strains, functions and dynamics in the expanded Human  
362 Microbiome Project. *Nature* **550**, 61-66, doi:10.1038/nature23889 (2017).

363 21 Wesolowska-Andersen, A. *et al.* Choice of bacterial DNA extraction method from fecal  
364 material influences community structure as evaluated by metagenomic analysis.  
365 *Microbiome* **2**, 19, doi:10.1186/2049-2618-2-19 (2014).

366 22 Shafquat, A., Joice, R., Simmons, S. L. & Huttenhower, C. Functional and phylogenetic  
367 assembly of microbial communities in the human microbiome. *Trends in microbiology*  
368 **22**, 261-266, doi:10.1016/j.tim.2014.01.011 (2014).

369 23 Buchfink, B., Xie, C. & Huson, D. H. Fast and sensitive protein alignment using  
370 DIAMOND. *Nature methods* **12**, 59-60, doi:10.1038/nmeth.3176 (2015).

371 24 Kimura, M. A simple method for estimating evolutionary rates of base substitutions  
372 through comparative studies of nucleotide sequences. *J Mol Evol* **16**, 111-120 (1980).

373

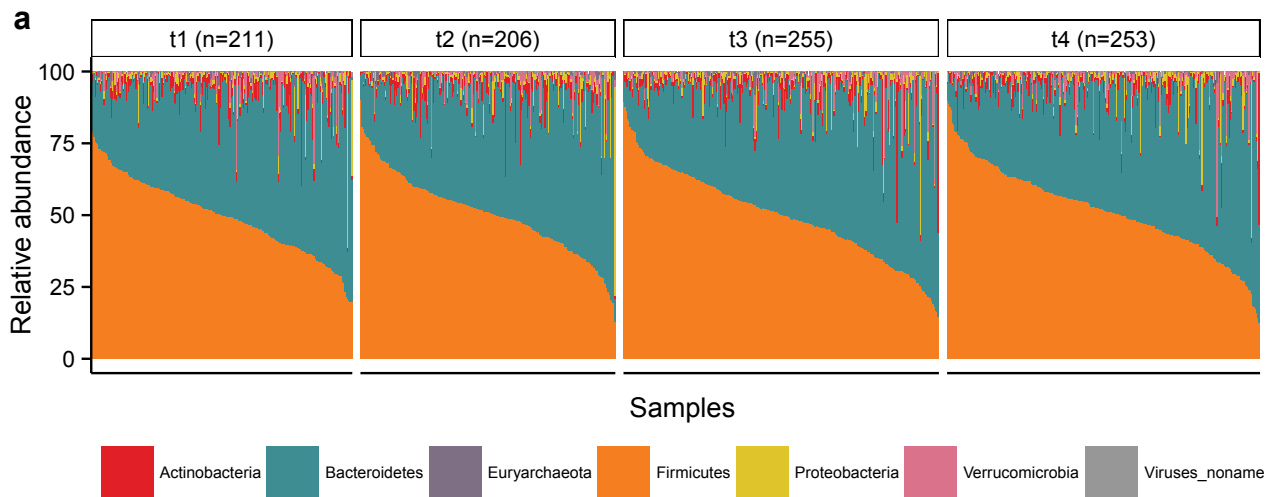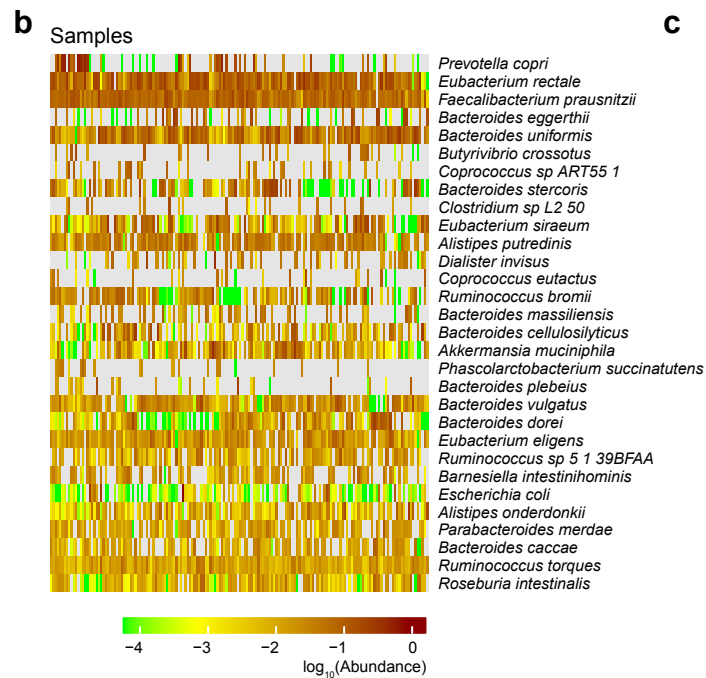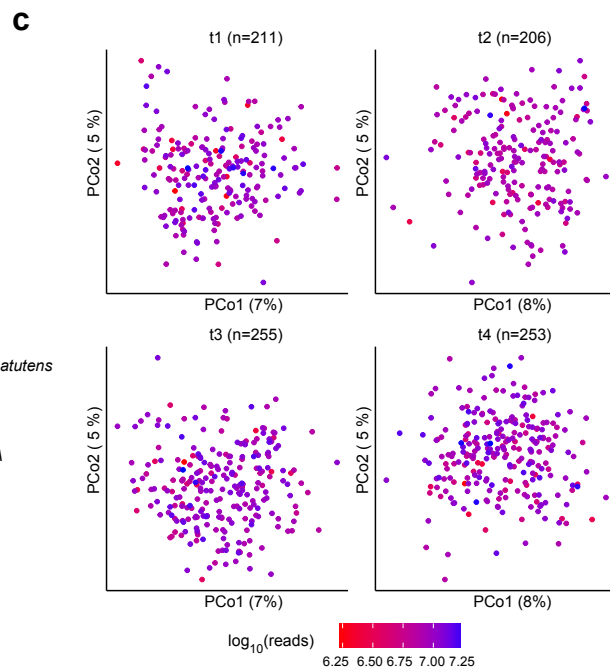

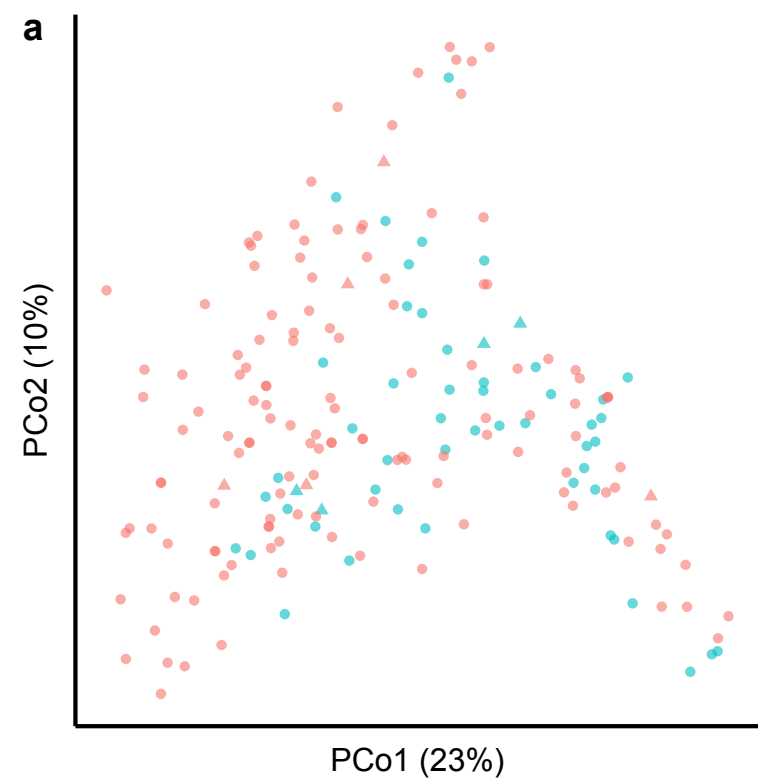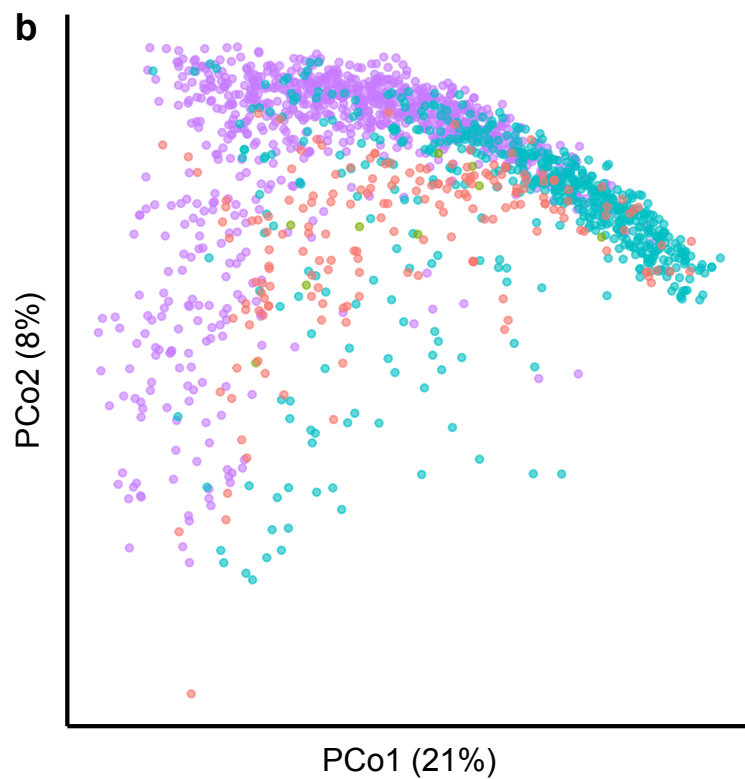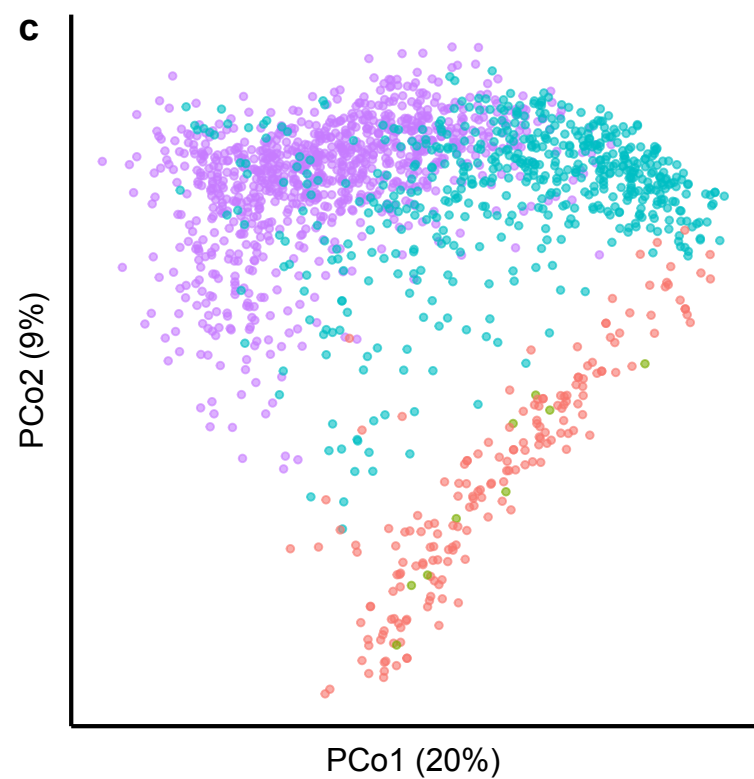

**a** Metagenome features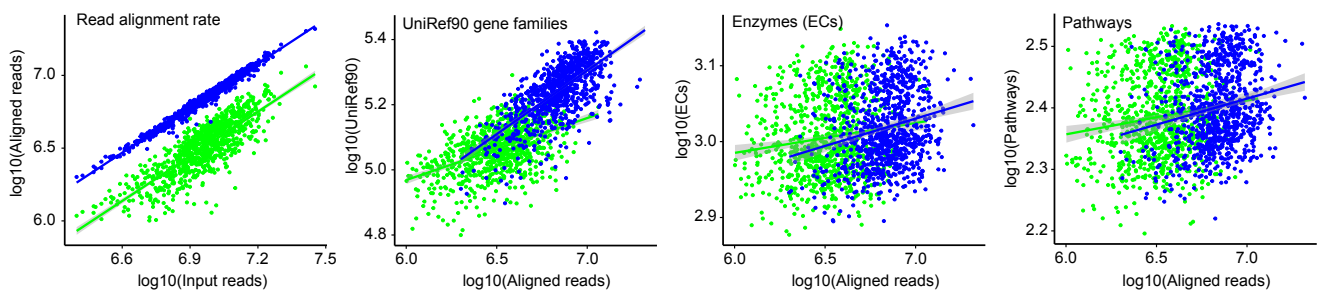**b** Metatranscriptome features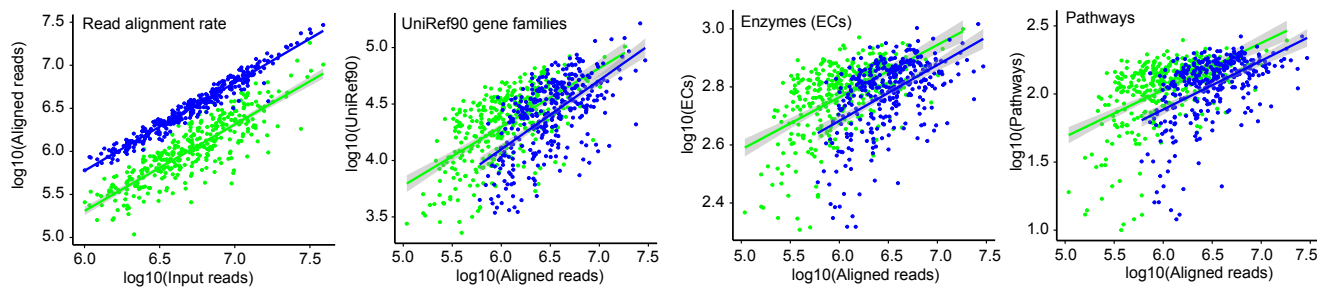**c** Species rarefaction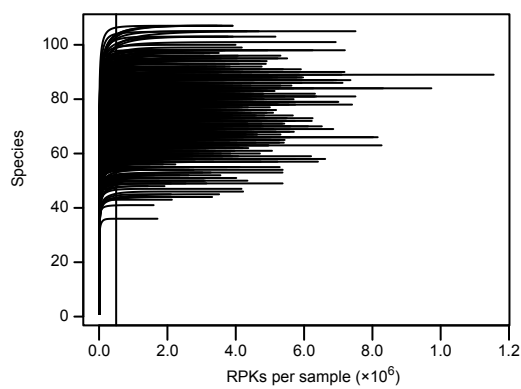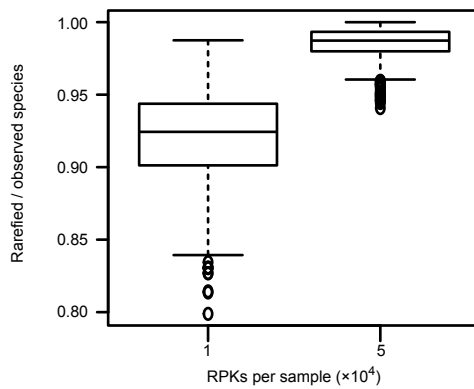**d** UniRef90 DNA rarefaction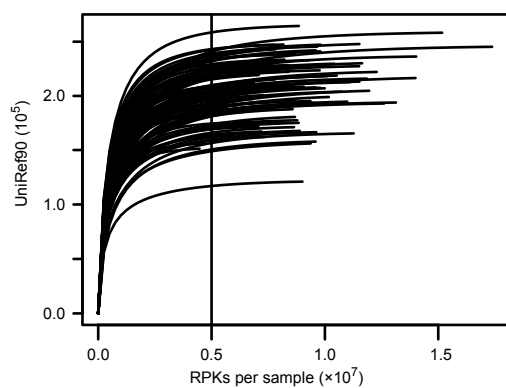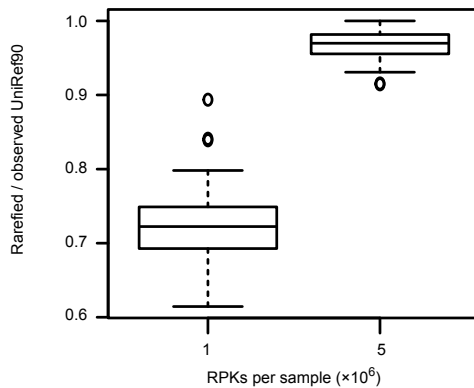**e** UniRef90 RNA rarefaction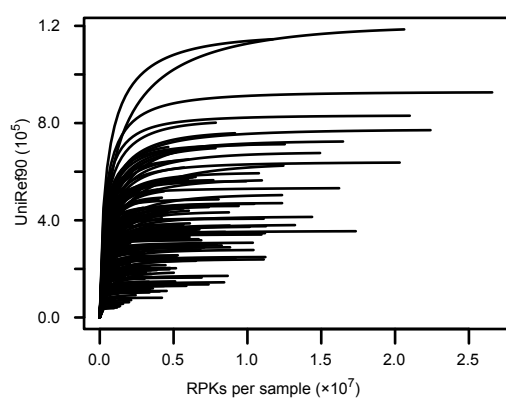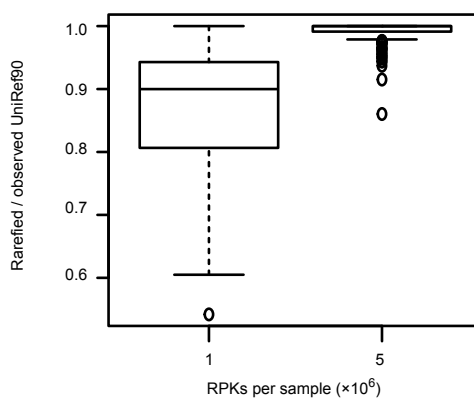

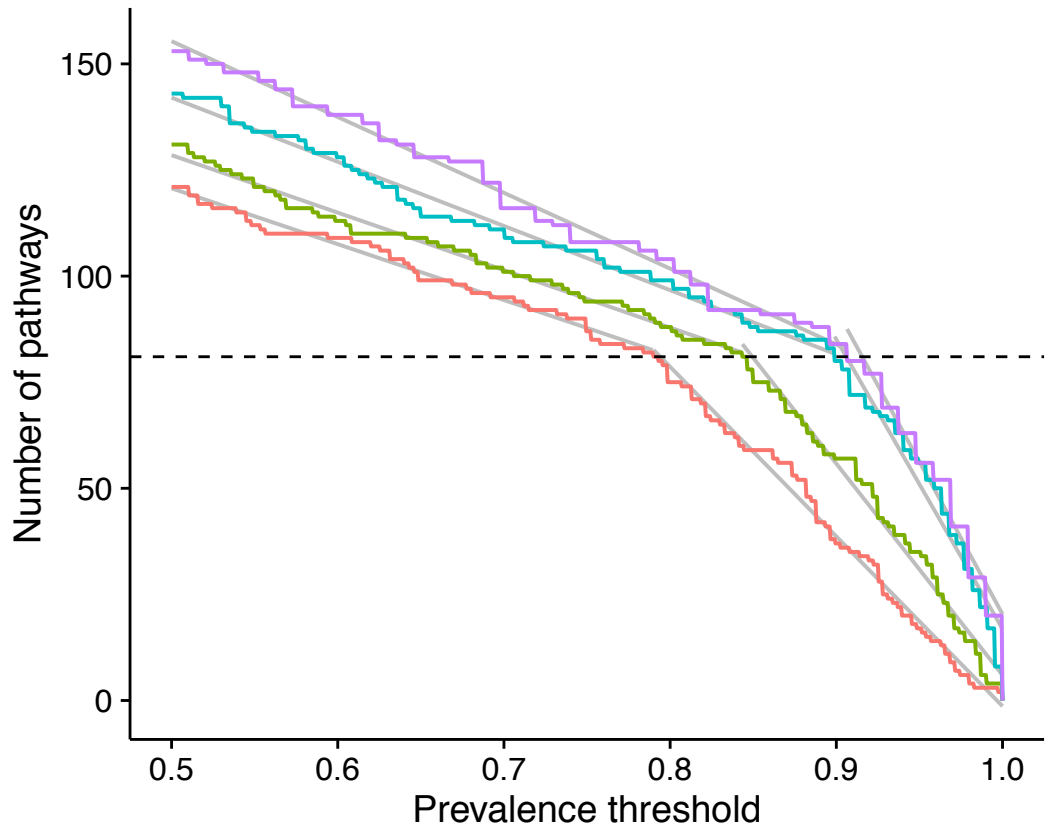

Minimum RNA reads — 1M — 2M — 4M — 8M

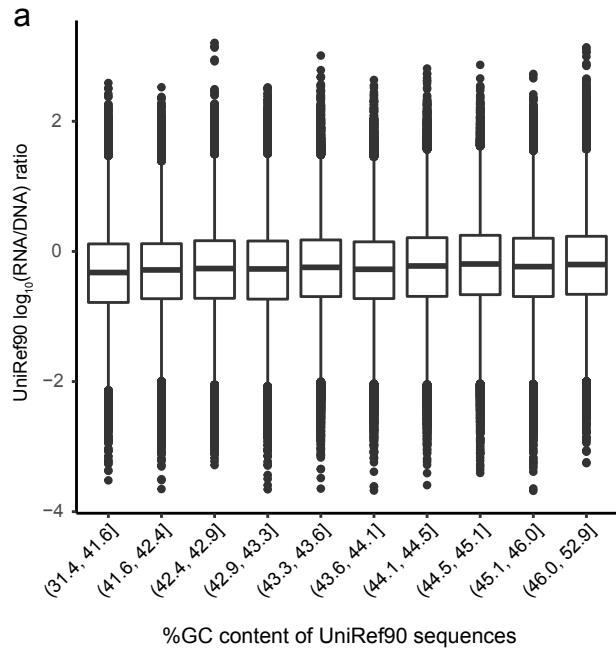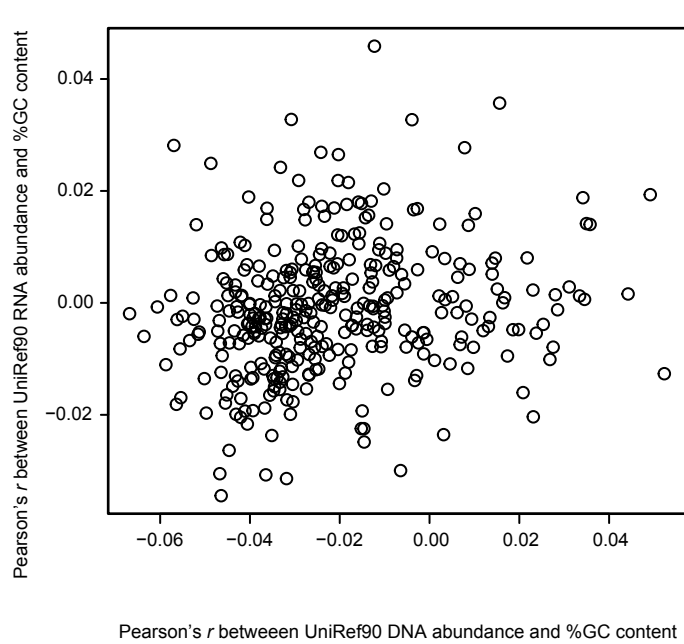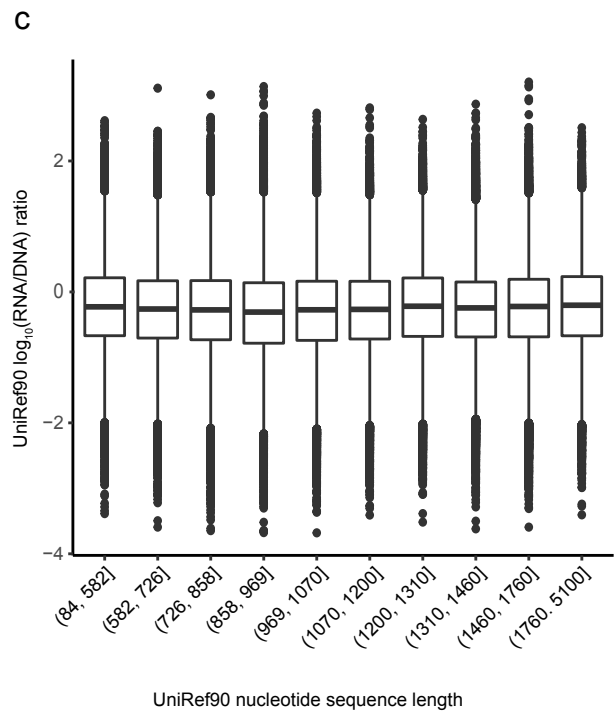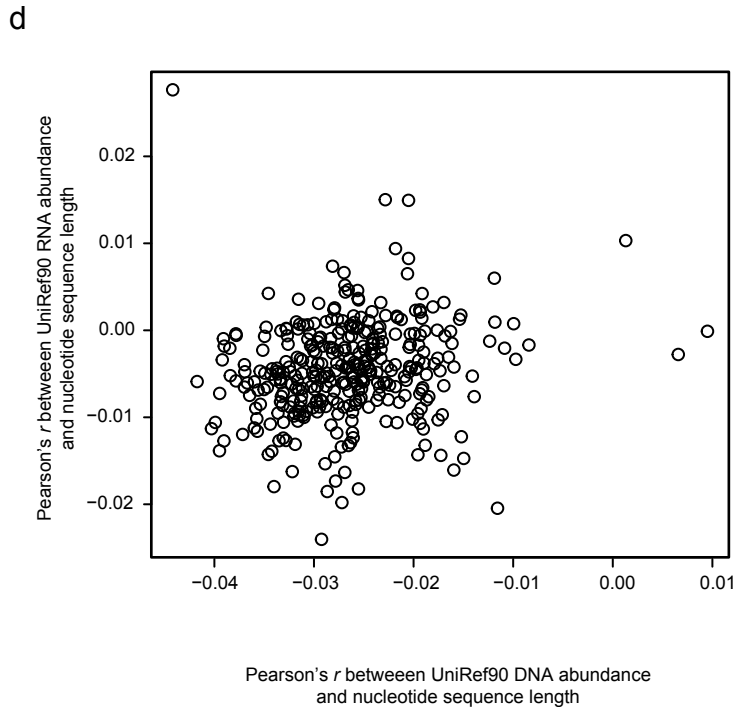

Supplement: NIHMS922671-supplement-Supplementary_Information.pdf [file NIHMS922671-supplement-Supplementary_Information.pdf]
