# Supplementary material
Source: PubMed Central journal article supplement (PMC6557121)

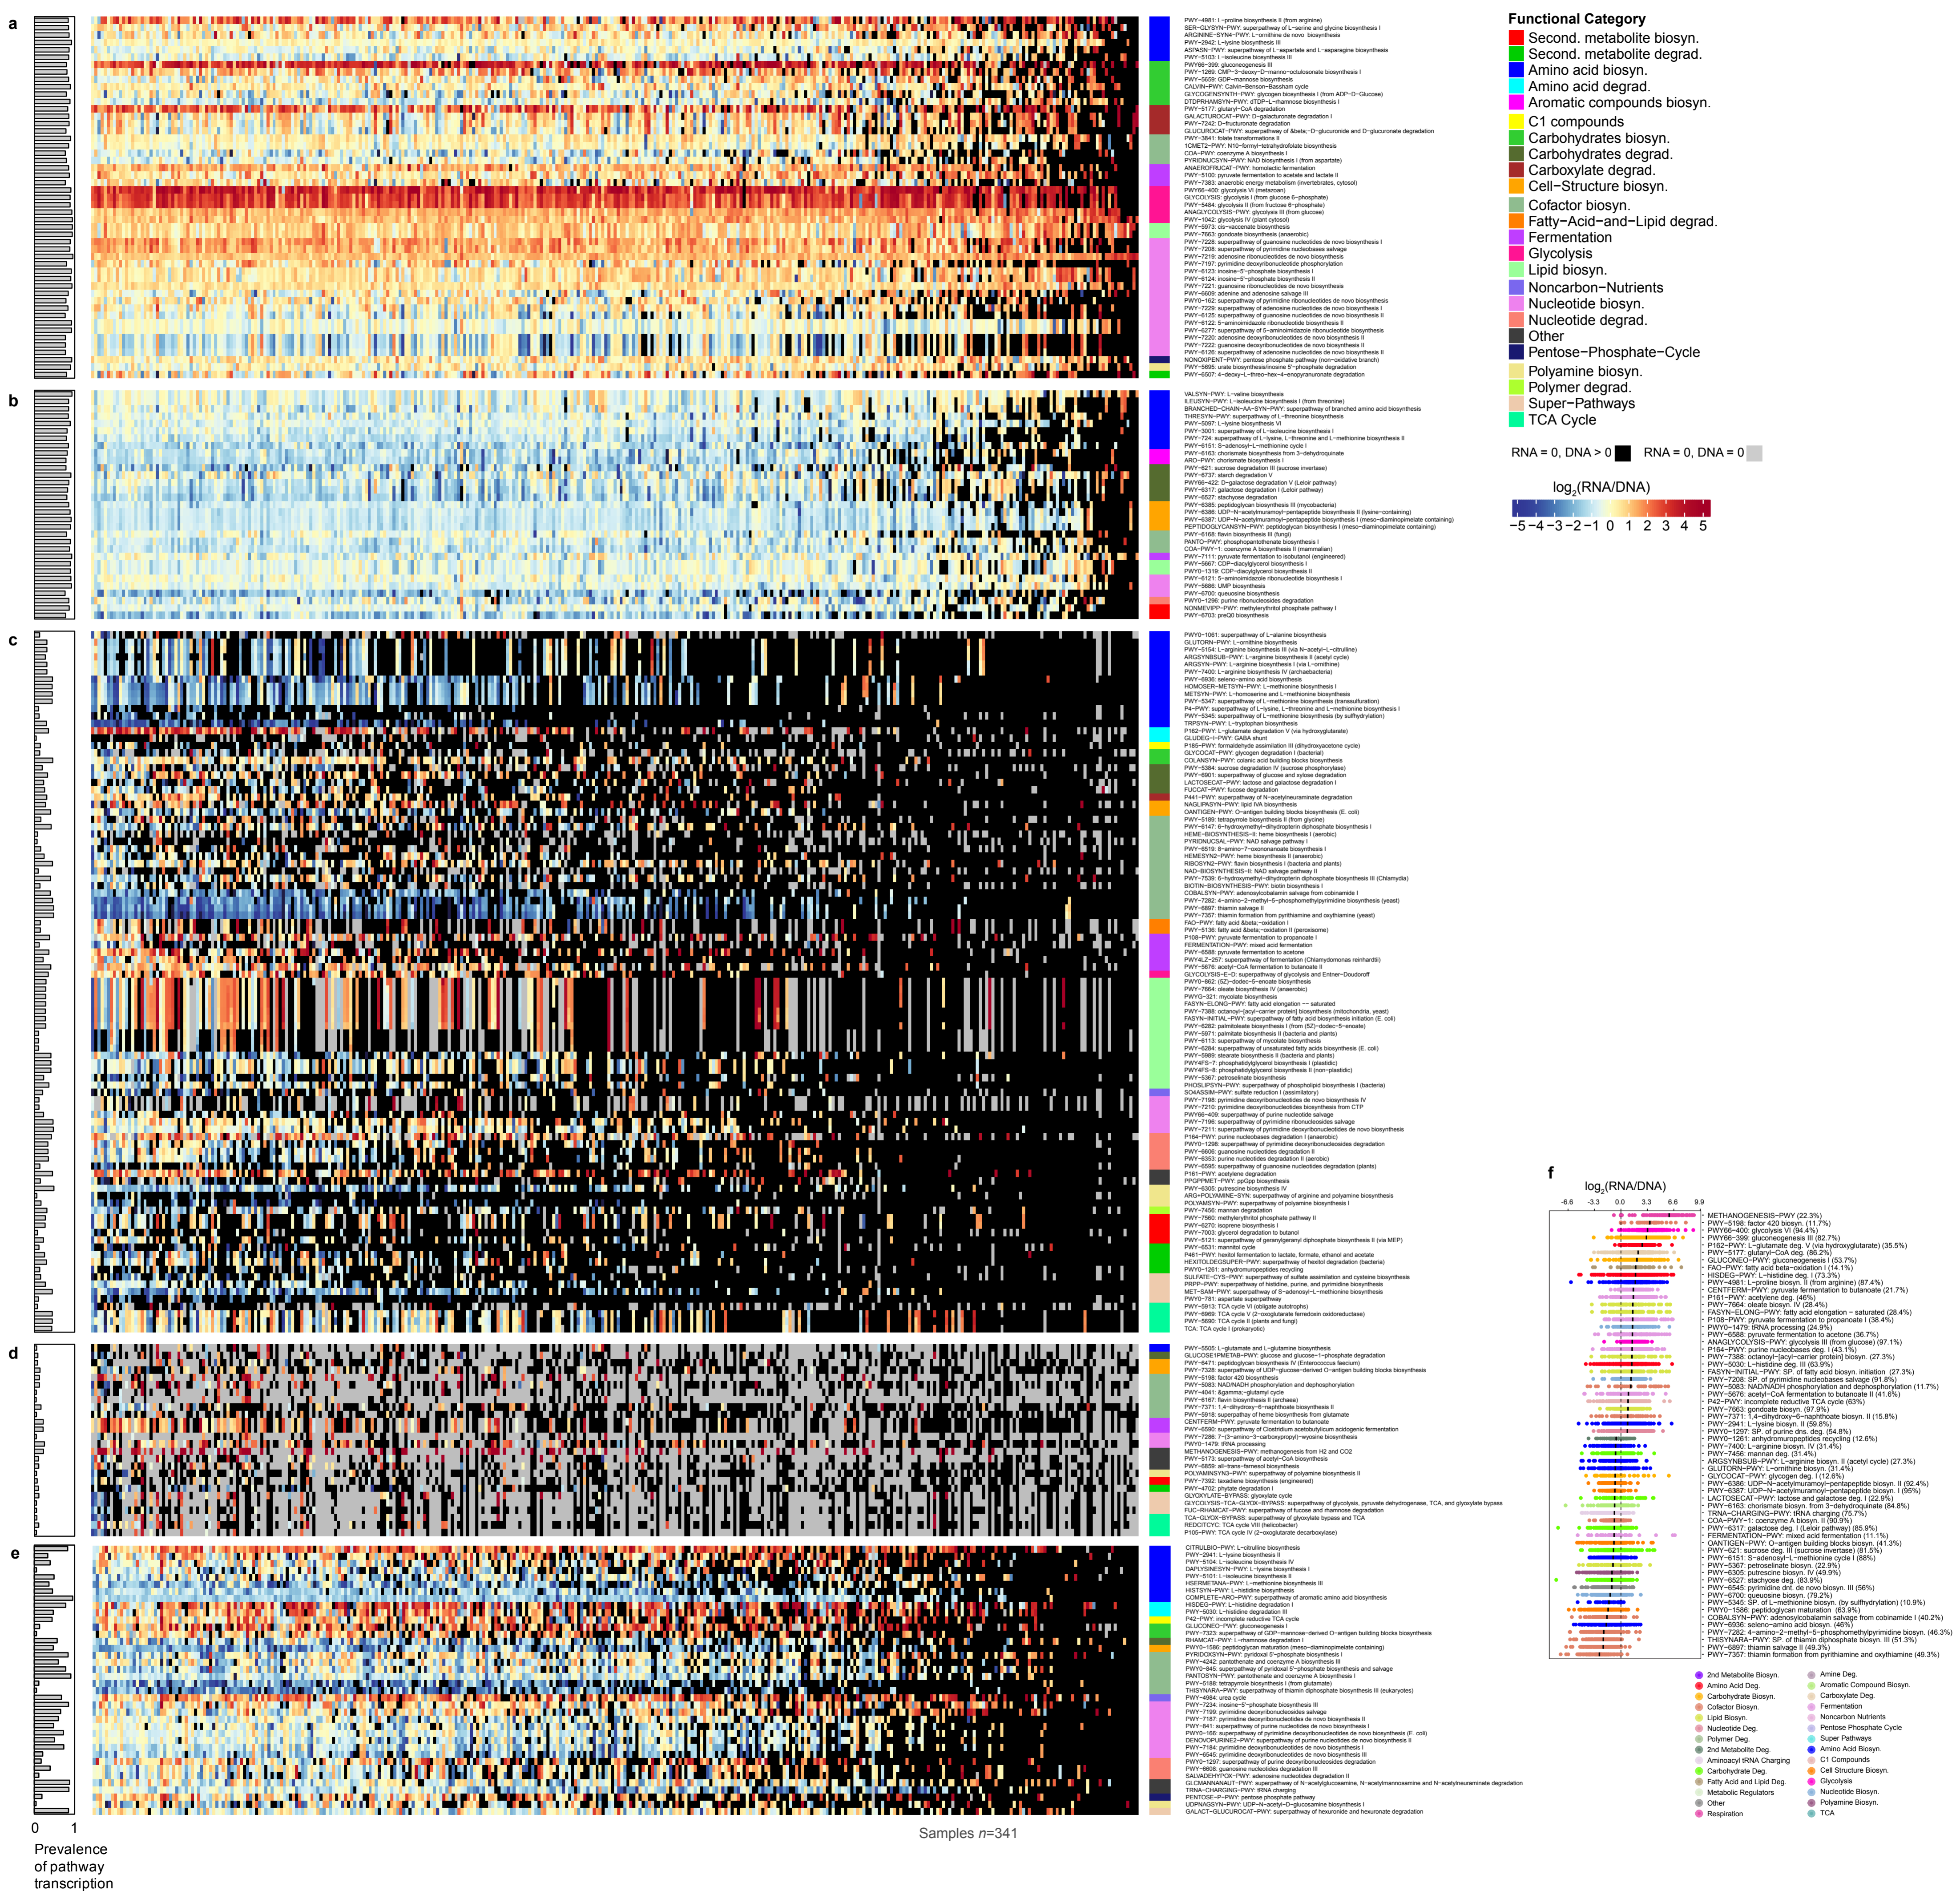

Supplement: NIHMS922671-supplement-Supplementary_Figure_6.pdf [file NIHMS922671-supplement-Supplementary_Figure_6.pdf]

**a****Week 1**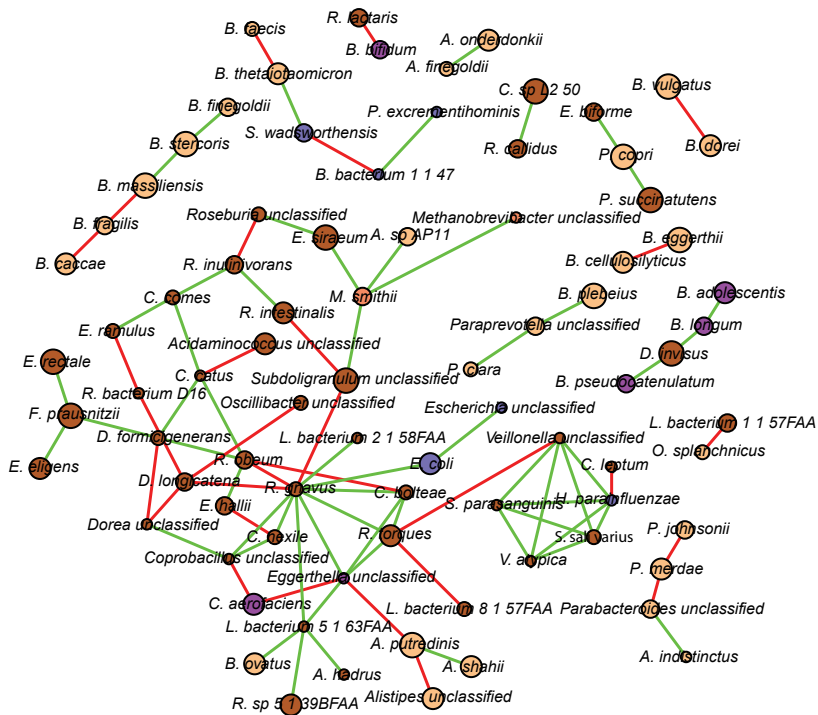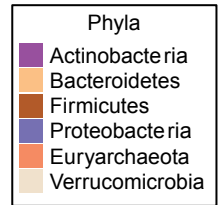**Ave. Rel. Abundance**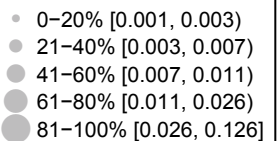**b****Week 2**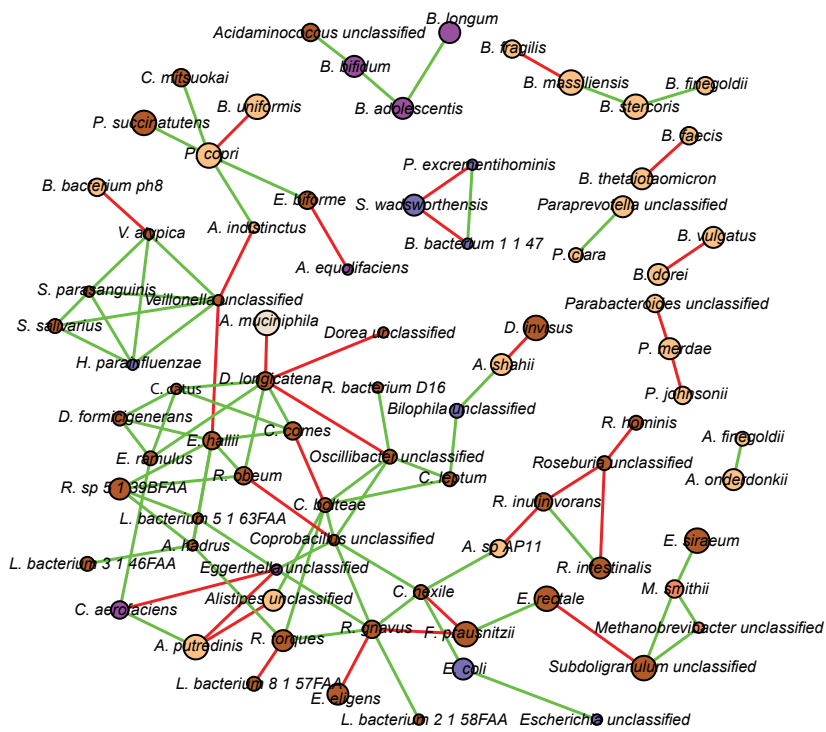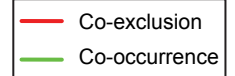

Supplement: NIHMS922671-supplement-Supplementary_Figure_9.pdf [file NIHMS922671-supplement-Supplementary_Figure_9.pdf]
